# Supplementary material for: Common garden comparisons confirm inherited differences in sensitivity to climate change between forest tree species
Source: PeerJ. 2019 Jan 15;7:e6213. doi: 10.7717/peerj.6213 (PMC6338101; doi:10.7717/peerj.6213)
Supplement: Supplemental Information 1 — Data set including averaged tree height (cm) per block of each population at each tests site; climate values for seed source (_s), tests site (_t) and climate transfer distance (_d). [file peerj-07-6213-s012.xlsx]

## Sheet: AllSp_data_PeerJ_01
Sp	Site	Blo	Age	HT	n	pop	Latitude_s	Longitude_s	Elevation_s	Tmax01_s	Tmax02_s	Tmax03_s	Tmax04_s	Tmax05_s	Tmax06_s	Tmax07_s	Tmax08_s	Tmax09_s	Tmax10_s	Tmax11_s	Tmax12_s	Tmin01_s	Tmin02_s	Tmin03_s	Tmin04_s	Tmin05_s	Tmin06_s	Tmin07_s	Tmin08_s	Tmin09_s	Tmin10_s	Tmin11_s	Tmin12_s	Tave01_s	Tave02_s	Tave03_s	Tave04_s	Tave05_s	Tave06_s	Tave07_s	Tave08_s	Tave09_s	Tave10_s	Tave11_s	Tave12_s	PPT01_s	PPT02_s	PPT03_s	PPT04_s
Fsy	Bucsuta	1	8	242.074	27	Aarnink	51.9333	6.7333	45	4.1	5.1	8.4	12.7	17.2	20.5	21.8	21.8	18.9	14.5	8.3	5	-1	-0.7	2.3	4	7.7	10.6	12.2	12	9.9	6.9	2.9	0.4	1.6	2.2	5.3	8.3	12.5	15.5	17	16.9	14.4	10.7	5.6	2.7	67	45	62	52
Fsy	Bucsuta	2	8	227.467	30	Aarnink	51.9333	6.7333	45	4.1	5.1	8.4	12.7	17.2	20.5	21.8	21.8	18.9	14.5	8.3	5	-1	-0.7	2.3	4	7.7	10.6	12.2	12	9.9	6.9	2.9	0.4	1.6	2.2	5.3	8.3	12.5	15.5	17	16.9	14.4	10.7	5.6	2.7	67	45	62	52
Fsy	Bucsuta	3	8	198.526	19	Aarnink	51.9333	6.7333	45	4.1	5.1	8.4	12.7	17.2	20.5	21.8	21.8	18.9	14.5	8.3	5	-1	-0.7	2.3	4	7.7	10.6	12.2	12	9.9	6.9	2.9	0.4	1.6	2.2	5.3	8.3	12.5	15.5	17	16.9	14.4	10.7	5.6	2.7	67	45	62	52
Fsy	Bucsuta	1	8	233.37	27	Bilowo11	54.3333	18.1667	250	-2.7	-2	2.9	8.9	14.6	18.1	19.5	18.9	14.9	10	3.9	-0.4	-6.7	-6.5	-2.9	1	5.5	9.2	11.2	10.6	7.8	4.3	0	-4.4	-4.7	-4.2	0	5	10.1	13.7	15.4	14.8	11.4	7.2	2	-2.4	41	30	30	37
Fsy	Bucsuta	2	8	198.333	27	Bilowo11	54.3333	18.1667	250	-2.7	-2	2.9	8.9	14.6	18.1	19.5	18.9	14.9	10	3.9	-0.4	-6.7	-6.5	-2.9	1	5.5	9.2	11.2	10.6	7.8	4.3	0	-4.4	-4.7	-4.2	0	5	10.1	13.7	15.4	14.8	11.4	7.2	2	-2.4	41	30	30	37
Fsy	Bucsuta	3	8	185.476	21	Bilowo11	54.3333	18.1667	250	-2.7	-2	2.9	8.9	14.6	18.1	19.5	18.9	14.9	10	3.9	-0.4	-6.7	-6.5	-2.9	1	5.5	9.2	11.2	10.6	7.8	4.3	0	-4.4	-4.7	-4.2	0	5	10.1	13.7	15.4	14.8	11.4	7.2	2	-2.4	41	30	30	37
Fsy	Bucsuta	1	8	203.889	27	HorniPla	48.85	14	990	-1.9	-0.3	4.3	9.1	14.3	17.6	19.3	18.7	15.4	10	3.2	-0.4	-8.2	-7.5	-4.5	-0.9	3.6	7	8.6	8.4	5.5	1.2	-2.7	-6	-5.1	-3.9	-0.1	4.1	9	12.3	14	13.6	10.4	5.6	0.3	-3.2	89	71	80	71
Fsy	Bucsuta	2	8	138.538	13	HorniPla	48.85	14	990	-1.9	-0.3	4.3	9.1	14.3	17.6	19.3	18.7	15.4	10	3.2	-0.4	-8.2	-7.5	-4.5	-0.9	3.6	7	8.6	8.4	5.5	1.2	-2.7	-6	-5.1	-3.9	-0.1	4.1	9	12.3	14	13.6	10.4	5.6	0.3	-3.2	89	71	80	71
Fsy	Bucsuta	3	8	122.533	30	HorniPla	48.85	14	990	-1.9	-0.3	4.3	9.1	14.3	17.6	19.3	18.7	15.4	10	3.2	-0.4	-8.2	-7.5	-4.5	-0.9	3.6	7	8.6	8.4	5.5	1.2	-2.7	-6	-5.1	-3.9	-0.1	4.1	9	12.3	14	13.6	10.4	5.6	0.3	-3.2	89	71	80	71
Fsy	Bucsuta	1	8	209.955	18	Nizbor	50	14	480	-0.7	1.5	6.5	11.8	17.2	20.1	22.1	21.5	17.6	12	4.9	0.9	-6.2	-4.9	-2	1.6	6.1	9.4	10.7	10.5	7.4	3.4	-1	-4.2	-3.5	-1.7	2.2	6.7	11.7	14.8	16.4	16	12.5	7.7	1.9	-1.7	27	24	29	36
Fsy	Bucsuta	2	8	167.25	7	Nizbor	50	14	480	-0.7	1.5	6.5	11.8	17.2	20.1	22.1	21.5	17.6	12	4.9	0.9	-6.2	-4.9	-2	1.6	6.1	9.4	10.7	10.5	7.4	3.4	-1	-4.2	-3.5	-1.7	2.2	6.7	11.7	14.8	16.4	16	12.5	7.7	1.9	-1.7	27	24	29	36
Fsy	Bucsuta	3	8	218.581	30	Nizbor	50	14	480	-0.7	1.5	6.5	11.8	17.2	20.1	22.1	21.5	17.6	12	4.9	0.9	-6.2	-4.9	-2	1.6	6.1	9.4	10.7	10.5	7.4	3.4	-1	-4.2	-3.5	-1.7	2.2	6.7	11.7	14.8	16.4	16	12.5	7.7	1.9	-1.7	27	24	29	36
Fsy	Bucsuta	1	8	183.833	6	Plateaux	46.8	5.8333	600	2.5	4.4	8.7	12.7	16.6	20.5	22.9	22.2	19.4	13.7	7.5	3.1	-3.2	-2.1	0.1	3.4	6.7	10.1	12	11.7	9.5	5.4	1.2	-2	-0.3	1.2	4.4	8	11.7	15.3	17.5	17	14.4	9.6	4.4	0.6	146	128	124	118
Fsy	Bucsuta	2	8	126.143	7	Plateaux	46.8	5.8333	600	2.5	4.4	8.7	12.7	16.6	20.5	22.9	22.2	19.4	13.7	7.5	3.1	-3.2	-2.1	0.1	3.4	6.7	10.1	12	11.7	9.5	5.4	1.2	-2	-0.3	1.2	4.4	8	11.7	15.3	17.5	17	14.4	9.6	4.4	0.6	146	128	124	118
Fsy	Bucsuta	3	8	147.385	13	Plateaux	46.8	5.8333	600	2.5	4.4	8.7	12.7	16.6	20.5	22.9	22.2	19.4	13.7	7.5	3.1	-3.2	-2.1	0.1	3.4	6.7	10.1	12	11.7	9.5	5.4	1.2	-2	-0.3	1.2	4.4	8	11.7	15.3	17.5	17	14.4	9.6	4.4	0.6	146	128	124	118
Fsy	Bucsuta	1	8	254.526	19	Soignes	50.8333	4.4167	110	4.2	6.3	9.3	13.5	17.8	21.4	22.2	21.8	20.1	15.3	8.6	5.3	-0.9	0.3	1.7	4.7	7.8	11	12.2	12.3	10.6	7.6	3.3	0.1	1.6	3.3	5.5	9.1	12.8	16.2	17.2	17.1	15.4	11.5	5.9	2.7	71	54	70	54
Fsy	Bucsuta	2	8	187	19	Soignes	50.8333	4.4167	110	4.2	6.3	9.3	13.5	17.8	21.4	22.2	21.8	20.1	15.3	8.6	5.3	-0.9	0.3	1.7	4.7	7.8	11	12.2	12.3	10.6	7.6	3.3	0.1	1.6	3.3	5.5	9.1	12.8	16.2	17.2	17.1	15.4	11.5	5.9	2.7	71	54	70	54
Fsy	Bucsuta	3	8	106.1	20	Soignes	50.8333	4.4167	110	4.2	6.3	9.3	13.5	17.8	21.4	22.2	21.8	20.1	15.3	8.6	5.3	-0.9	0.3	1.7	4.7	7.8	11	12.2	12.3	10.6	7.6	3.3	0.1	1.6	3.3	5.5	9.1	12.8	16.2	17.2	17.1	15.4	11.5	5.9	2.7	71	54	70	54
Fsy	Bucsuta	1	8	110.125	8	Torup	55.5667	13.2	40	1.9	2.1	4.9	9	14.6	18.9	19.8	19.6	16.2	11.8	7	3.3	-2.6	-2.7	-0.8	2.1	7.1	11.3	12.8	12.3	9.9	6.7	1.3	-0.5	-0.4	-0.3	2	5.5	10.8	15.1	16.3	15.9	13	9.2	4.1	1.4	55	34	44	36
Fsy	Bucsuta	2	8	125.5	18	Torup	55.5667	13.2	40	1.9	2.1	4.9	9	14.6	18.9	19.8	19.6	16.2	11.8	7	3.3	-2.6	-2.7	-0.8	2.1	7.1	11.3	12.8	12.3	9.9	6.7	1.3	-0.5	-0.4	-0.3	2	5.5	10.8	15.1	16.3	15.9	13	9.2	4.1	1.4	55	34	44	36
Fsy	Bucsuta	3	8	157.179	28	Torup	55.5667	13.2	40	1.9	2.1	4.9	9	14.6	18.9	19.8	19.6	16.2	11.8	7	3.3	-2.6	-2.7	-0.8	2.1	7.1	11.3	12.8	12.3	9.9	6.7	1.3	-0.5	-0.4	-0.3	2	5.5	10.8	15.1	16.3	15.9	13	9.2	4.1	1.4	55	34	44	36
Fsy	Bucsuta	1	8	220.97	33	UrachBW	48.4667	9.45	760	0.7	2.6	6.7	11	15.6	19	21.2	20.5	18	12.5	5.8	1.7	-4.9	-3.9	-1.8	1.5	5.4	8.9	10.7	10.1	7.7	3.7	-0.6	-3.7	-2.1	-0.7	2.5	6.3	10.5	14	15.9	15.3	12.8	8.1	2.6	-1	66	57	57	84
Fsy	Bucsuta	2	8	192.118	34	UrachBW	48.4667	9.45	760	0.7	2.6	6.7	11	15.6	19	21.2	20.5	18	12.5	5.8	1.7	-4.9	-3.9	-1.8	1.5	5.4	8.9	10.7	10.1	7.7	3.7	-0.6	-3.7	-2.1	-0.7	2.5	6.3	10.5	14	15.9	15.3	12.8	8.1	2.6	-1	66	57	57	84
Fsy	Bucsuta	3	8	191.077	39	UrachBW	48.4667	9.45	760	0.7	2.6	6.7	11	15.6	19	21.2	20.5	18	12.5	5.8	1.7	-4.9	-3.9	-1.8	1.5	5.4	8.9	10.7	10.1	7.7	3.7	-0.6	-3.7	-2.1	-0.7	2.5	6.3	10.5	14	15.9	15.3	12.8	8.1	2.6	-1	66	57	57	84
Fsy	Bucsuta	1	8	279.15	20	Westfiel	57.4	-2.75	10	6.3	6.1	8.6	10.9	13.5	16.8	17.9	17.6	15.7	13	8.4	7	0.3	-0.1	1.4	2.8	5.6	8.6	9.9	9.6	8.1	5.8	2.2	1.2	3.3	3	5	6.9	9.5	12.7	13.9	13.6	11.9	9.4	5.3	4.1	80	59	62	53
Fsy	Bucsuta	2	8	196.407	27	Westfiel	57.4	-2.75	10	6.3	6.1	8.6	10.9	13.5	16.8	17.9	17.6	15.7	13	8.4	7	0.3	-0.1	1.4	2.8	5.6	8.6	9.9	9.6	8.1	5.8	2.2	1.2	3.3	3	5	6.9	9.5	12.7	13.9	13.6	11.9	9.4	5.3	4.1	80	59	62	53
Fsy	Bucsuta	3	8	106.263	19	Westfiel	57.4	-2.75	10	6.3	6.1	8.6	10.9	13.5	16.8	17.9	17.6	15.7	13	8.4	7	0.3	-0.1	1.4	2.8	5.6	8.6	9.9	9.6	8.1	5.8	2.2	1.2	3.3	3	5	6.9	9.5	12.7	13.9	13.6	11.9	9.4	5.3	4.1	80	59	62	53
Fsy	Hahnengr	1	8	182.49	49	Aarnink	51.9333	6.7333	45	4.1	5.1	8.4	12.7	17.2	20.5	21.8	21.8	18.9	14.5	8.3	5	-1	-0.7	2.3	4	7.7	10.6	12.2	12	9.9	6.9	2.9	0.4	1.6	2.2	5.3	8.3	12.5	15.5	17	16.9	14.4	10.7	5.6	2.7	67	45	62	52
Fsy	Hahnengr	2	8	193.913	46	Aarnink	51.9333	6.7333	45	4.1	5.1	8.4	12.7	17.2	20.5	21.8	21.8	18.9	14.5	8.3	5	-1	-0.7	2.3	4	7.7	10.6	12.2	12	9.9	6.9	2.9	0.4	1.6	2.2	5.3	8.3	12.5	15.5	17	16.9	14.4	10.7	5.6	2.7	67	45	62	52
Fsy	Hahnengr	3	8	154.375	32	Aarnink	51.9333	6.7333	45	4.1	5.1	8.4	12.7	17.2	20.5	21.8	21.8	18.9	14.5	8.3	5	-1	-0.7	2.3	4	7.7	10.6	12.2	12	9.9	6.9	2.9	0.4	1.6	2.2	5.3	8.3	12.5	15.5	17	16.9	14.4	10.7	5.6	2.7	67	45	62	52
Fsy	Hahnengr	1	8	163.25	40	Bilowo11	54.3333	18.1667	250	-2.7	-2	2.9	8.9	14.6	18.1	19.5	18.9	14.9	10	3.9	-0.4	-6.7	-6.5	-2.9	1	5.5	9.2	11.2	10.6	7.8	4.3	0	-4.4	-4.7	-4.2	0	5	10.1	13.7	15.4	14.8	11.4	7.2	2	-2.4	41	30	30	37
Fsy	Hahnengr	2	8	171.88	50	Bilowo11	54.3333	18.1667	250	-2.7	-2	2.9	8.9	14.6	18.1	19.5	18.9	14.9	10	3.9	-0.4	-6.7	-6.5	-2.9	1	5.5	9.2	11.2	10.6	7.8	4.3	0	-4.4	-4.7	-4.2	0	5	10.1	13.7	15.4	14.8	11.4	7.2	2	-2.4	41	30	30	37
Fsy	Hahnengr	3	8	174.545	33	Bilowo11	54.3333	18.1667	250	-2.7	-2	2.9	8.9	14.6	18.1	19.5	18.9	14.9	10	3.9	-0.4	-6.7	-6.5	-2.9	1	5.5	9.2	11.2	10.6	7.8	4.3	0	-4.4	-4.7	-4.2	0	5	10.1	13.7	15.4	14.8	11.4	7.2	2	-2.4	41	30	30	37
Fsy	Hahnengr	1	8	219.7	50	HorniPla	48.85	14	990	-1.9	-0.3	4.3	9.1	14.3	17.6	19.3	18.7	15.4	10	3.2	-0.4	-8.2	-7.5	-4.5	-0.9	3.6	7	8.6	8.4	5.5	1.2	-2.7	-6	-5.1	-3.9	-0.1	4.1	9	12.3	14	13.6	10.4	5.6	0.3	-3.2	89	71	80	71
Fsy	Hahnengr	2	8	224.78	50	HorniPla	48.85	14	990	-1.9	-0.3	4.3	9.1	14.3	17.6	19.3	18.7	15.4	10	3.2	-0.4	-8.2	-7.5	-4.5	-0.9	3.6	7	8.6	8.4	5.5	1.2	-2.7	-6	-5.1	-3.9	-0.1	4.1	9	12.3	14	13.6	10.4	5.6	0.3	-3.2	89	71	80	71
Fsy	Hahnengr	3	8	196.062	32	HorniPla	48.85	14	990	-1.9	-0.3	4.3	9.1	14.3	17.6	19.3	18.7	15.4	10	3.2	-0.4	-8.2	-7.5	-4.5	-0.9	3.6	7	8.6	8.4	5.5	1.2	-2.7	-6	-5.1	-3.9	-0.1	4.1	9	12.3	14	13.6	10.4	5.6	0.3	-3.2	89	71	80	71
Fsy	Hahnengr	1	8	212.66	47	Nizbor	50	14	480	-0.7	1.5	6.5	11.8	17.2	20.1	22.1	21.5	17.6	12	4.9	0.9	-6.2	-4.9	-2	1.6	6.1	9.4	10.7	10.5	7.4	3.4	-1	-4.2	-3.5	-1.7	2.2	6.7	11.7	14.8	16.4	16	12.5	7.7	1.9	-1.7	27	24	29	36
Fsy	Hahnengr	2	8	155.1	40	Nizbor	50	14	480	-0.7	1.5	6.5	11.8	17.2	20.1	22.1	21.5	17.6	12	4.9	0.9	-6.2	-4.9	-2	1.6	6.1	9.4	10.7	10.5	7.4	3.4	-1	-4.2	-3.5	-1.7	2.2	6.7	11.7	14.8	16.4	16	12.5	7.7	1.9	-1.7	27	24	29	36
Fsy	Hahnengr	3	8	151.739	46	Nizbor	50	14	480	-0.7	1.5	6.5	11.8	17.2	20.1	22.1	21.5	17.6	12	4.9	0.9	-6.2	-4.9	-2	1.6	6.1	9.4	10.7	10.5	7.4	3.4	-1	-4.2	-3.5	-1.7	2.2	6.7	11.7	14.8	16.4	16	12.5	7.7	1.9	-1.7	27	24	29	36
Fsy	Hahnengr	1	8	136.143	35	Plateaux	46.8	5.8333	600	2.5	4.4	8.7	12.7	16.6	20.5	22.9	22.2	19.4	13.7	7.5	3.1	-3.2	-2.1	0.1	3.4	6.7	10.1	12	11.7	9.5	5.4	1.2	-2	-0.3	1.2	4.4	8	11.7	15.3	17.5	17	14.4	9.6	4.4	0.6	146	128	124	118
Fsy	Hahnengr	2	8	189.793	29	Plateaux	46.8	5.8333	600	2.5	4.4	8.7	12.7	16.6	20.5	22.9	22.2	19.4	13.7	7.5	3.1	-3.2	-2.1	0.1	3.4	6.7	10.1	12	11.7	9.5	5.4	1.2	-2	-0.3	1.2	4.4	8	11.7	15.3	17.5	17	14.4	9.6	4.4	0.6	146	128	124	118
Fsy	Hahnengr	3	8	140.75	40	Plateaux	46.8	5.8333	600	2.5	4.4	8.7	12.7	16.6	20.5	22.9	22.2	19.4	13.7	7.5	3.1	-3.2	-2.1	0.1	3.4	6.7	10.1	12	11.7	9.5	5.4	1.2	-2	-0.3	1.2	4.4	8	11.7	15.3	17.5	17	14.4	9.6	4.4	0.6	146	128	124	118
Fsy	Hahnengr	1	8	204	50	Soignes	50.8333	4.4167	110	4.2	6.3	9.3	13.5	17.8	21.4	22.2	21.8	20.1	15.3	8.6	5.3	-0.9	0.3	1.7	4.7	7.8	11	12.2	12.3	10.6	7.6	3.3	0.1	1.6	3.3	5.5	9.1	12.8	16.2	17.2	17.1	15.4	11.5	5.9	2.7	71	54	70	54
Fsy	Hahnengr	2	8	214.333	30	Soignes	50.8333	4.4167	110	4.2	6.3	9.3	13.5	17.8	21.4	22.2	21.8	20.1	15.3	8.6	5.3	-0.9	0.3	1.7	4.7	7.8	11	12.2	12.3	10.6	7.6	3.3	0.1	1.6	3.3	5.5	9.1	12.8	16.2	17.2	17.1	15.4	11.5	5.9	2.7	71	54	70	54
Fsy	Hahnengr	3	8	181.923	39	Soignes	50.8333	4.4167	110	4.2	6.3	9.3	13.5	17.8	21.4	22.2	21.8	20.1	15.3	8.6	5.3	-0.9	0.3	1.7	4.7	7.8	11	12.2	12.3	10.6	7.6	3.3	0.1	1.6	3.3	5.5	9.1	12.8	16.2	17.2	17.1	15.4	11.5	5.9	2.7	71	54	70	54
Fsy	Hahnengr	1	8	160.295	44	Torup	55.5667	13.2	40	1.9	2.1	4.9	9	14.6	18.9	19.8	19.6	16.2	11.8	7	3.3	-2.6	-2.7	-0.8	2.1	7.1	11.3	12.8	12.3	9.9	6.7	1.3	-0.5	-0.4	-0.3	2	5.5	10.8	15.1	16.3	15.9	13	9.2	4.1	1.4	55	34	44	36
Fsy	Hahnengr	2	8	192.143	49	Torup	55.5667	13.2	40	1.9	2.1	4.9	9	14.6	18.9	19.8	19.6	16.2	11.8	7	3.3	-2.6	-2.7	-0.8	2.1	7.1	11.3	12.8	12.3	9.9	6.7	1.3	-0.5	-0.4	-0.3	2	5.5	10.8	15.1	16.3	15.9	13	9.2	4.1	1.4	55	34	44	36
Fsy	Hahnengr	3	8	166.6	50	Torup	55.5667	13.2	40	1.9	2.1	4.9	9	14.6	18.9	19.8	19.6	16.2	11.8	7	3.3	-2.6	-2.7	-0.8	2.1	7.1	11.3	12.8	12.3	9.9	6.7	1.3	-0.5	-0.4	-0.3	2	5.5	10.8	15.1	16.3	15.9	13	9.2	4.1	1.4	55	34	44	36
Fsy	Hahnengr	1	8	180	48	UrachBW	48.4667	9.45	760	0.7	2.6	6.7	11	15.6	19	21.2	20.5	18	12.5	5.8	1.7	-4.9	-3.9	-1.8	1.5	5.4	8.9	10.7	10.1	7.7	3.7	-0.6	-3.7	-2.1	-0.7	2.5	6.3	10.5	14	15.9	15.3	12.8	8.1	2.6	-1	66	57	57	84
Fsy	Hahnengr	2	8	179.733	45	UrachBW	48.4667	9.45	760	0.7	2.6	6.7	11	15.6	19	21.2	20.5	18	12.5	5.8	1.7	-4.9	-3.9	-1.8	1.5	5.4	8.9	10.7	10.1	7.7	3.7	-0.6	-3.7	-2.1	-0.7	2.5	6.3	10.5	14	15.9	15.3	12.8	8.1	2.6	-1	66	57	57	84
Fsy	Hahnengr	3	8	166.923	26	UrachBW	48.4667	9.45	760	0.7	2.6	6.7	11	15.6	19	21.2	20.5	18	12.5	5.8	1.7	-4.9	-3.9	-1.8	1.5	5.4	8.9	10.7	10.1	7.7	3.7	-0.6	-3.7	-2.1	-0.7	2.5	6.3	10.5	14	15.9	15.3	12.8	8.1	2.6	-1	66	57	57	84
Fsy	Hahnengr	1	8	176.444	45	Westfiel	57.4	-2.75	10	6.3	6.1	8.6	10.9	13.5	16.8	17.9	17.6	15.7	13	8.4	7	0.3	-0.1	1.4	2.8	5.6	8.6	9.9	9.6	8.1	5.8	2.2	1.2	3.3	3	5	6.9	9.5	12.7	13.9	13.6	11.9	9.4	5.3	4.1	80	59	62	53
Fsy	Hahnengr	2	8	165.106	47	Westfiel	57.4	-2.75	10	6.3	6.1	8.6	10.9	13.5	16.8	17.9	17.6	15.7	13	8.4	7	0.3	-0.1	1.4	2.8	5.6	8.6	9.9	9.6	8.1	5.8	2.2	1.2	3.3	3	5	6.9	9.5	12.7	13.9	13.6	11.9	9.4	5.3	4.1	80	59	62	53
Fsy	Hahnengr	3	8	143.571	14	Westfiel	57.4	-2.75	10	6.3	6.1	8.6	10.9	13.5	16.8	17.9	17.6	15.7	13	8.4	7	0.3	-0.1	1.4	2.8	5.6	8.6	9.9	9.6	8.1	5.8	2.2	1.2	3.3	3	5	6.9	9.5	12.7	13.9	13.6	11.9	9.4	5.3	4.1	80	59	62	53
Fsy	Harre	1	8	97.7333	15	Aarnink	51.9333	6.7333	45	4.1	5.1	8.4	12.7	17.2	20.5	21.8	21.8	18.9	14.5	8.3	5	-1	-0.7	2.3	4	7.7	10.6	12.2	12	9.9	6.9	2.9	0.4	1.6	2.2	5.3	8.3	12.5	15.5	17	16.9	14.4	10.7	5.6	2.7	67	45	62	52
Fsy	Harre	2	8	118.037	27	Aarnink	51.9333	6.7333	45	4.1	5.1	8.4	12.7	17.2	20.5	21.8	21.8	18.9	14.5	8.3	5	-1	-0.7	2.3	4	7.7	10.6	12.2	12	9.9	6.9	2.9	0.4	1.6	2.2	5.3	8.3	12.5	15.5	17	16.9	14.4	10.7	5.6	2.7	67	45	62	52
Fsy	Harre	3	8	110.24	25	Aarnink	51.9333	6.7333	45	4.1	5.1	8.4	12.7	17.2	20.5	21.8	21.8	18.9	14.5	8.3	5	-1	-0.7	2.3	4	7.7	10.6	12.2	12	9.9	6.9	2.9	0.4	1.6	2.2	5.3	8.3	12.5	15.5	17	16.9	14.4	10.7	5.6	2.7	67	45	62	52
Fsy	Harre	1	8	135.591	22	Bilowo11	54.3333	18.1667	250	-2.7	-2	2.9	8.9	14.6	18.1	19.5	18.9	14.9	10	3.9	-0.4	-6.7	-6.5	-2.9	1	5.5	9.2	11.2	10.6	7.8	4.3	0	-4.4	-4.7	-4.2	0	5	10.1	13.7	15.4	14.8	11.4	7.2	2	-2.4	41	30	30	37
Fsy	Harre	2	8	200.471	34	Bilowo11	54.3333	18.1667	250	-2.7	-2	2.9	8.9	14.6	18.1	19.5	18.9	14.9	10	3.9	-0.4	-6.7	-6.5	-2.9	1	5.5	9.2	11.2	10.6	7.8	4.3	0	-4.4	-4.7	-4.2	0	5	10.1	13.7	15.4	14.8	11.4	7.2	2	-2.4	41	30	30	37
Fsy	Harre	3	8	114.909	22	Bilowo11	54.3333	18.1667	250	-2.7	-2	2.9	8.9	14.6	18.1	19.5	18.9	14.9	10	3.9	-0.4	-6.7	-6.5	-2.9	1	5.5	9.2	11.2	10.6	7.8	4.3	0	-4.4	-4.7	-4.2	0	5	10.1	13.7	15.4	14.8	11.4	7.2	2	-2.4	41	30	30	37
Fsy	Harre	1	8	133.294	34	HorniPla	48.85	14	990	-1.9	-0.3	4.3	9.1	14.3	17.6	19.3	18.7	15.4	10	3.2	-0.4	-8.2	-7.5	-4.5	-0.9	3.6	7	8.6	8.4	5.5	1.2	-2.7	-6	-5.1	-3.9	-0.1	4.1	9	12.3	14	13.6	10.4	5.6	0.3	-3.2	89	71	80	71
Fsy	Harre	2	8	150.919	37	HorniPla	48.85	14	990	-1.9	-0.3	4.3	9.1	14.3	17.6	19.3	18.7	15.4	10	3.2	-0.4	-8.2	-7.5	-4.5	-0.9	3.6	7	8.6	8.4	5.5	1.2	-2.7	-6	-5.1	-3.9	-0.1	4.1	9	12.3	14	13.6	10.4	5.6	0.3	-3.2	89	71	80	71
Fsy	Harre	3	8	101.588	34	HorniPla	48.85	14	990	-1.9	-0.3	4.3	9.1	14.3	17.6	19.3	18.7	15.4	10	3.2	-0.4	-8.2	-7.5	-4.5	-0.9	3.6	7	8.6	8.4	5.5	1.2	-2.7	-6	-5.1	-3.9	-0.1	4.1	9	12.3	14	13.6	10.4	5.6	0.3	-3.2	89	71	80	71
Fsy	Harre	1	8	121.588	17	Nizbor	50	14	480	-0.7	1.5	6.5	11.8	17.2	20.1	22.1	21.5	17.6	12	4.9	0.9	-6.2	-4.9	-2	1.6	6.1	9.4	10.7	10.5	7.4	3.4	-1	-4.2	-3.5	-1.7	2.2	6.7	11.7	14.8	16.4	16	12.5	7.7	1.9	-1.7	27	24	29	36
Fsy	Harre	2	8	178.553	38	Nizbor	50	14	480	-0.7	1.5	6.5	11.8	17.2	20.1	22.1	21.5	17.6	12	4.9	0.9	-6.2	-4.9	-2	1.6	6.1	9.4	10.7	10.5	7.4	3.4	-1	-4.2	-3.5	-1.7	2.2	6.7	11.7	14.8	16.4	16	12.5	7.7	1.9	-1.7	27	24	29	36
Fsy	Harre	3	8	82.4667	30	Nizbor	50	14	480	-0.7	1.5	6.5	11.8	17.2	20.1	22.1	21.5	17.6	12	4.9	0.9	-6.2	-4.9	-2	1.6	6.1	9.4	10.7	10.5	7.4	3.4	-1	-4.2	-3.5	-1.7	2.2	6.7	11.7	14.8	16.4	16	12.5	7.7	1.9	-1.7	27	24	29	36
Fsy	Harre	1	8	75.8947	19	Plateaux	46.8	5.8333	600	2.5	4.4	8.7	12.7	16.6	20.5	22.9	22.2	19.4	13.7	7.5	3.1	-3.2	-2.1	0.1	3.4	6.7	10.1	12	11.7	9.5	5.4	1.2	-2	-0.3	1.2	4.4	8	11.7	15.3	17.5	17	14.4	9.6	4.4	0.6	146	128	124	118
Fsy	Harre	2	8	114.308	13	Plateaux	46.8	5.8333	600	2.5	4.4	8.7	12.7	16.6	20.5	22.9	22.2	19.4	13.7	7.5	3.1	-3.2	-2.1	0.1	3.4	6.7	10.1	12	11.7	9.5	5.4	1.2	-2	-0.3	1.2	4.4	8	11.7	15.3	17.5	17	14.4	9.6	4.4	0.6	146	128	124	118
Fsy	Harre	3	8	76.6471	17	Plateaux	46.8	5.8333	600	2.5	4.4	8.7	12.7	16.6	20.5	22.9	22.2	19.4	13.7	7.5	3.1	-3.2	-2.1	0.1	3.4	6.7	10.1	12	11.7	9.5	5.4	1.2	-2	-0.3	1.2	4.4	8	11.7	15.3	17.5	17	14.4	9.6	4.4	0.6	146	128	124	118
Fsy	Harre	1	8	146.692	26	Soignes	50.8333	4.4167	110	4.2	6.3	9.3	13.5	17.8	21.4	22.2	21.8	20.1	15.3	8.6	5.3	-0.9	0.3	1.7	4.7	7.8	11	12.2	12.3	10.6	7.6	3.3	0.1	1.6	3.3	5.5	9.1	12.8	16.2	17.2	17.1	15.4	11.5	5.9	2.7	71	54	70	54
Fsy	Harre	2	8	132.593	27	Soignes	50.8333	4.4167	110	4.2	6.3	9.3	13.5	17.8	21.4	22.2	21.8	20.1	15.3	8.6	5.3	-0.9	0.3	1.7	4.7	7.8	11	12.2	12.3	10.6	7.6	3.3	0.1	1.6	3.3	5.5	9.1	12.8	16.2	17.2	17.1	15.4	11.5	5.9	2.7	71	54	70	54
Fsy	Harre	3	8	90.9	20	Soignes	50.8333	4.4167	110	4.2	6.3	9.3	13.5	17.8	21.4	22.2	21.8	20.1	15.3	8.6	5.3	-0.9	0.3	1.7	4.7	7.8	11	12.2	12.3	10.6	7.6	3.3	0.1	1.6	3.3	5.5	9.1	12.8	16.2	17.2	17.1	15.4	11.5	5.9	2.7	71	54	70	54
Fsy	Harre	1	8	110.161	31	Torup	55.5667	13.2	40	1.9	2.1	4.9	9	14.6	18.9	19.8	19.6	16.2	11.8	7	3.3	-2.6	-2.7	-0.8	2.1	7.1	11.3	12.8	12.3	9.9	6.7	1.3	-0.5	-0.4	-0.3	2	5.5	10.8	15.1	16.3	15.9	13	9.2	4.1	1.4	55	34	44	36
Fsy	Harre	2	8	155.174	23	Torup	55.5667	13.2	40	1.9	2.1	4.9	9	14.6	18.9	19.8	19.6	16.2	11.8	7	3.3	-2.6	-2.7	-0.8	2.1	7.1	11.3	12.8	12.3	9.9	6.7	1.3	-0.5	-0.4	-0.3	2	5.5	10.8	15.1	16.3	15.9	13	9.2	4.1	1.4	55	34	44	36
Fsy	Harre	3	8	138.381	21	Torup	55.5667	13.2	40	1.9	2.1	4.9	9	14.6	18.9	19.8	19.6	16.2	11.8	7	3.3	-2.6	-2.7	-0.8	2.1	7.1	11.3	12.8	12.3	9.9	6.7	1.3	-0.5	-0.4	-0.3	2	5.5	10.8	15.1	16.3	15.9	13	9.2	4.1	1.4	55	34	44	36
Fsy	Harre	1	8	153.381	42	UrachBW	48.4667	9.45	760	0.7	2.6	6.7	11	15.6	19	21.2	20.5	18	12.5	5.8	1.7	-4.9	-3.9	-1.8	1.5	5.4	8.9	10.7	10.1	7.7	3.7	-0.6	-3.7	-2.1	-0.7	2.5	6.3	10.5	14	15.9	15.3	12.8	8.1	2.6	-1	66	57	57	84
Fsy	Harre	2	8	208.043	47	UrachBW	48.4667	9.45	760	0.7	2.6	6.7	11	15.6	19	21.2	20.5	18	12.5	5.8	1.7	-4.9	-3.9	-1.8	1.5	5.4	8.9	10.7	10.1	7.7	3.7	-0.6	-3.7	-2.1	-0.7	2.5	6.3	10.5	14	15.9	15.3	12.8	8.1	2.6	-1	66	57	57	84
Fsy	Harre	3	8	220.444	45	UrachBW	48.4667	9.45	760	0.7	2.6	6.7	11	15.6	19	21.2	20.5	18	12.5	5.8	1.7	-4.9	-3.9	-1.8	1.5	5.4	8.9	10.7	10.1	7.7	3.7	-0.6	-3.7	-2.1	-0.7	2.5	6.3	10.5	14	15.9	15.3	12.8	8.1	2.6	-1	66	57	57	84
Fsy	Harre	1	8	114.25	20	Westfiel	57.4	-2.75	10	6.3	6.1	8.6	10.9	13.5	16.8	17.9	17.6	15.7	13	8.4	7	0.3	-0.1	1.4	2.8	5.6	8.6	9.9	9.6	8.1	5.8	2.2	1.2	3.3	3	5	6.9	9.5	12.7	13.9	13.6	11.9	9.4	5.3	4.1	80	59	62	53
Fsy	Harre	2	8	141.8	25	Westfiel	57.4	-2.75	10	6.3	6.1	8.6	10.9	13.5	16.8	17.9	17.6	15.7	13	8.4	7	0.3	-0.1	1.4	2.8	5.6	8.6	9.9	9.6	8.1	5.8	2.2	1.2	3.3	3	5	6.9	9.5	12.7	13.9	13.6	11.9	9.4	5.3	4.1	80	59	62	53
Fsy	Harre	3	8	87.1739	23	Westfiel	57.4	-2.75	10	6.3	6.1	8.6	10.9	13.5	16.8	17.9	17.6	15.7	13	8.4	7	0.3	-0.1	1.4	2.8	5.6	8.6	9.9	9.6	8.1	5.8	2.2	1.2	3.3	3	5	6.9	9.5	12.7	13.9	13.6	11.9	9.4	5.3	4.1	80	59	62	53
Fsy	Mlacik	1	8	189.074	27	Aarnink	51.9333	6.7333	45	4.1	5.1	8.4	12.7	17.2	20.5	21.8	21.8	18.9	14.5	8.3	5	-1	-0.7	2.3	4	7.7	10.6	12.2	12	9.9	6.9	2.9	0.4	1.6	2.2	5.3	8.3	12.5	15.5	17	16.9	14.4	10.7	5.6	2.7	67	45	62	52
Fsy	Mlacik	2	8	165.742	31	Aarnink	51.9333	6.7333	45	4.1	5.1	8.4	12.7	17.2	20.5	21.8	21.8	18.9	14.5	8.3	5	-1	-0.7	2.3	4	7.7	10.6	12.2	12	9.9	6.9	2.9	0.4	1.6	2.2	5.3	8.3	12.5	15.5	17	16.9	14.4	10.7	5.6	2.7	67	45	62	52
Fsy	Mlacik	3	8	175.824	17	Aarnink	51.9333	6.7333	45	4.1	5.1	8.4	12.7	17.2	20.5	21.8	21.8	18.9	14.5	8.3	5	-1	-0.7	2.3	4	7.7	10.6	12.2	12	9.9	6.9	2.9	0.4	1.6	2.2	5.3	8.3	12.5	15.5	17	16.9	14.4	10.7	5.6	2.7	67	45	62	52
Fsy	Mlacik	1	8	179.222	45	Bilowo11	54.3333	18.1667	250	-2.7	-2	2.9	8.9	14.6	18.1	19.5	18.9	14.9	10	3.9	-0.4	-6.7	-6.5	-2.9	1	5.5	9.2	11.2	10.6	7.8	4.3	0	-4.4	-4.7	-4.2	0	5	10.1	13.7	15.4	14.8	11.4	7.2	2	-2.4	41	30	30	37
Fsy	Mlacik	2	8	164.029	34	Bilowo11	54.3333	18.1667	250	-2.7	-2	2.9	8.9	14.6	18.1	19.5	18.9	14.9	10	3.9	-0.4	-6.7	-6.5	-2.9	1	5.5	9.2	11.2	10.6	7.8	4.3	0	-4.4	-4.7	-4.2	0	5	10.1	13.7	15.4	14.8	11.4	7.2	2	-2.4	41	30	30	37
Fsy	Mlacik	3	8	161.139	36	Bilowo11	54.3333	18.1667	250	-2.7	-2	2.9	8.9	14.6	18.1	19.5	18.9	14.9	10	3.9	-0.4	-6.7	-6.5	-2.9	1	5.5	9.2	11.2	10.6	7.8	4.3	0	-4.4	-4.7	-4.2	0	5	10.1	13.7	15.4	14.8	11.4	7.2	2	-2.4	41	30	30	37
Fsy	Mlacik	1	8	137.432	44	HorniPla	48.85	14	990	-1.9	-0.3	4.3	9.1	14.3	17.6	19.3	18.7	15.4	10	3.2	-0.4	-8.2	-7.5	-4.5	-0.9	3.6	7	8.6	8.4	5.5	1.2	-2.7	-6	-5.1	-3.9	-0.1	4.1	9	12.3	14	13.6	10.4	5.6	0.3	-3.2	89	71	80	71
Fsy	Mlacik	2	8	175.413	46	HorniPla	48.85	14	990	-1.9	-0.3	4.3	9.1	14.3	17.6	19.3	18.7	15.4	10	3.2	-0.4	-8.2	-7.5	-4.5	-0.9	3.6	7	8.6	8.4	5.5	1.2	-2.7	-6	-5.1	-3.9	-0.1	4.1	9	12.3	14	13.6	10.4	5.6	0.3	-3.2	89	71	80	71
Fsy	Mlacik	3	8	162.571	28	HorniPla	48.85	14	990	-1.9	-0.3	4.3	9.1	14.3	17.6	19.3	18.7	15.4	10	3.2	-0.4	-8.2	-7.5	-4.5	-0.9	3.6	7	8.6	8.4	5.5	1.2	-2.7	-6	-5.1	-3.9	-0.1	4.1	9	12.3	14	13.6	10.4	5.6	0.3	-3.2	89	71	80	71
Fsy	Mlacik	1	8	113.548	31	Nizbor	50	14	480	-0.7	1.5	6.5	11.8	17.2	20.1	22.1	21.5	17.6	12	4.9	0.9	-6.2	-4.9	-2	1.6	6.1	9.4	10.7	10.5	7.4	3.4	-1	-4.2	-3.5	-1.7	2.2	6.7	11.7	14.8	16.4	16	12.5	7.7	1.9	-1.7	27	24	29	36
Fsy	Mlacik	2	8	147.091	22	Nizbor	50	14	480	-0.7	1.5	6.5	11.8	17.2	20.1	22.1	21.5	17.6	12	4.9	0.9	-6.2	-4.9	-2	1.6	6.1	9.4	10.7	10.5	7.4	3.4	-1	-4.2	-3.5	-1.7	2.2	6.7	11.7	14.8	16.4	16	12.5	7.7	1.9	-1.7	27	24	29	36
Fsy	Mlacik	3	8	143.278	36	Nizbor	50	14	480	-0.7	1.5	6.5	11.8	17.2	20.1	22.1	21.5	17.6	12	4.9	0.9	-6.2	-4.9	-2	1.6	6.1	9.4	10.7	10.5	7.4	3.4	-1	-4.2	-3.5	-1.7	2.2	6.7	11.7	14.8	16.4	16	12.5	7.7	1.9	-1.7	27	24	29	36
Fsy	Mlacik	1	8	143.25	20	Plateaux	46.8	5.8333	600	2.5	4.4	8.7	12.7	16.6	20.5	22.9	22.2	19.4	13.7	7.5	3.1	-3.2	-2.1	0.1	3.4	6.7	10.1	12	11.7	9.5	5.4	1.2	-2	-0.3	1.2	4.4	8	11.7	15.3	17.5	17	14.4	9.6	4.4	0.6	146	128	124	118
Fsy	Mlacik	2	8	118.6	15	Plateaux	46.8	5.8333	600	2.5	4.4	8.7	12.7	16.6	20.5	22.9	22.2	19.4	13.7	7.5	3.1	-3.2	-2.1	0.1	3.4	6.7	10.1	12	11.7	9.5	5.4	1.2	-2	-0.3	1.2	4.4	8	11.7	15.3	17.5	17	14.4	9.6	4.4	0.6	146	128	124	118
Fsy	Mlacik	3	8	204.519	27	Plateaux	46.8	5.8333	600	2.5	4.4	8.7	12.7	16.6	20.5	22.9	22.2	19.4	13.7	7.5	3.1	-3.2	-2.1	0.1	3.4	6.7	10.1	12	11.7	9.5	5.4	1.2	-2	-0.3	1.2	4.4	8	11.7	15.3	17.5	17	14.4	9.6	4.4	0.6	146	128	124	118
Fsy	Mlacik	1	8	130.303	33	Soignes	50.8333	4.4167	110	4.2	6.3	9.3	13.5	17.8	21.4	22.2	21.8	20.1	15.3	8.6	5.3	-0.9	0.3	1.7	4.7	7.8	11	12.2	12.3	10.6	7.6	3.3	0.1	1.6	3.3	5.5	9.1	12.8	16.2	17.2	17.1	15.4	11.5	5.9	2.7	71	54	70	54
Fsy	Mlacik	2	8	189.469	32	Soignes	50.8333	4.4167	110	4.2	6.3	9.3	13.5	17.8	21.4	22.2	21.8	20.1	15.3	8.6	5.3	-0.9	0.3	1.7	4.7	7.8	11	12.2	12.3	10.6	7.6	3.3	0.1	1.6	3.3	5.5	9.1	12.8	16.2	17.2	17.1	15.4	11.5	5.9	2.7	71	54	70	54
Fsy	Mlacik	3	8	180.536	28	Soignes	50.8333	4.4167	110	4.2	6.3	9.3	13.5	17.8	21.4	22.2	21.8	20.1	15.3	8.6	5.3	-0.9	0.3	1.7	4.7	7.8	11	12.2	12.3	10.6	7.6	3.3	0.1	1.6	3.3	5.5	9.1	12.8	16.2	17.2	17.1	15.4	11.5	5.9	2.7	71	54	70	54
Fsy	Mlacik	1	8	118.333	30	Torup	55.5667	13.2	40	1.9	2.1	4.9	9	14.6	18.9	19.8	19.6	16.2	11.8	7	3.3	-2.6	-2.7	-0.8	2.1	7.1	11.3	12.8	12.3	9.9	6.7	1.3	-0.5	-0.4	-0.3	2	5.5	10.8	15.1	16.3	15.9	13	9.2	4.1	1.4	55	34	44	36
Fsy	Mlacik	2	8	106.579	19	Torup	55.5667	13.2	40	1.9	2.1	4.9	9	14.6	18.9	19.8	19.6	16.2	11.8	7	3.3	-2.6	-2.7	-0.8	2.1	7.1	11.3	12.8	12.3	9.9	6.7	1.3	-0.5	-0.4	-0.3	2	5.5	10.8	15.1	16.3	15.9	13	9.2	4.1	1.4	55	34	44	36
Fsy	Mlacik	3	8	143.667	18	Torup	55.5667	13.2	40	1.9	2.1	4.9	9	14.6	18.9	19.8	19.6	16.2	11.8	7	3.3	-2.6	-2.7	-0.8	2.1	7.1	11.3	12.8	12.3	9.9	6.7	1.3	-0.5	-0.4	-0.3	2	5.5	10.8	15.1	16.3	15.9	13	9.2	4.1	1.4	55	34	44	36
Fsy	Mlacik	1	8	173.919	37	UrachBW	48.4667	9.45	760	0.7	2.6	6.7	11	15.6	19	21.2	20.5	18	12.5	5.8	1.7	-4.9	-3.9	-1.8	1.5	5.4	8.9	10.7	10.1	7.7	3.7	-0.6	-3.7	-2.1	-0.7	2.5	6.3	10.5	14	15.9	15.3	12.8	8.1	2.6	-1	66	57	57	84
Fsy	Mlacik	2	8	161.368	38	UrachBW	48.4667	9.45	760	0.7	2.6	6.7	11	15.6	19	21.2	20.5	18	12.5	5.8	1.7	-4.9	-3.9	-1.8	1.5	5.4	8.9	10.7	10.1	7.7	3.7	-0.6	-3.7	-2.1	-0.7	2.5	6.3	10.5	14	15.9	15.3	12.8	8.1	2.6	-1	66	57	57	84
Fsy	Mlacik	3	8	185.368	38	UrachBW	48.4667	9.45	760	0.7	2.6	6.7	11	15.6	19	21.2	20.5	18	12.5	5.8	1.7	-4.9	-3.9	-1.8	1.5	5.4	8.9	10.7	10.1	7.7	3.7	-0.6	-3.7	-2.1	-0.7	2.5	6.3	10.5	14	15.9	15.3	12.8	8.1	2.6	-1	66	57	57	84
Fsy	Mlacik	1	8	180	25	Westfiel	57.4	-2.75	10	6.3	6.1	8.6	10.9	13.5	16.8	17.9	17.6	15.7	13	8.4	7	0.3	-0.1	1.4	2.8	5.6	8.6	9.9	9.6	8.1	5.8	2.2	1.2	3.3	3	5	6.9	9.5	12.7	13.9	13.6	11.9	9.4	5.3	4.1	80	59	62	53
Fsy	Mlacik	2	8	176.6	25	Westfiel	57.4	-2.75	10	6.3	6.1	8.6	10.9	13.5	16.8	17.9	17.6	15.7	13	8.4	7	0.3	-0.1	1.4	2.8	5.6	8.6	9.9	9.6	8.1	5.8	2.2	1.2	3.3	3	5	6.9	9.5	12.7	13.9	13.6	11.9	9.4	5.3	4.1	80	59	62	53
Fsy	Mlacik	3	8	147	22	Westfiel	57.4	-2.75	10	6.3	6.1	8.6	10.9	13.5	16.8	17.9	17.6	15.7	13	8.4	7	0.3	-0.1	1.4	2.8	5.6	8.6	9.9	9.6	8.1	5.8	2.2	1.2	3.3	3	5	6.9	9.5	12.7	13.9	13.6	11.9	9.4	5.3	4.1	80	59	62	53
Fsy	Oosteren	1	8	274.091	22	Aarnink	51.9333	6.7333	45	4.1	5.1	8.4	12.7	17.2	20.5	21.8	21.8	18.9	14.5	8.3	5	-1	-0.7	2.3	4	7.7	10.6	12.2	12	9.9	6.9	2.9	0.4	1.6	2.2	5.3	8.3	12.5	15.5	17	16.9	14.4	10.7	5.6	2.7	67	45	62	52
Fsy	Oosteren	2	8	250	23	Aarnink	51.9333	6.7333	45	4.1	5.1	8.4	12.7	17.2	20.5	21.8	21.8	18.9	14.5	8.3	5	-1	-0.7	2.3	4	7.7	10.6	12.2	12	9.9	6.9	2.9	0.4	1.6	2.2	5.3	8.3	12.5	15.5	17	16.9	14.4	10.7	5.6	2.7	67	45	62	52
Fsy	Oosteren	3	8	304.074	81	Aarnink	51.9333	6.7333	45	4.1	5.1	8.4	12.7	17.2	20.5	21.8	21.8	18.9	14.5	8.3	5	-1	-0.7	2.3	4	7.7	10.6	12.2	12	9.9	6.9	2.9	0.4	1.6	2.2	5.3	8.3	12.5	15.5	17	16.9	14.4	10.7	5.6	2.7	67	45	62	52
Fsy	Oosteren	1	8	218.056	36	Bilowo11	54.3333	18.1667	250	-2.7	-2	2.9	8.9	14.6	18.1	19.5	18.9	14.9	10	3.9	-0.4	-6.7	-6.5	-2.9	1	5.5	9.2	11.2	10.6	7.8	4.3	0	-4.4	-4.7	-4.2	0	5	10.1	13.7	15.4	14.8	11.4	7.2	2	-2.4	41	30	30	37
Fsy	Oosteren	2	8	287.619	21	Bilowo11	54.3333	18.1667	250	-2.7	-2	2.9	8.9	14.6	18.1	19.5	18.9	14.9	10	3.9	-0.4	-6.7	-6.5	-2.9	1	5.5	9.2	11.2	10.6	7.8	4.3	0	-4.4	-4.7	-4.2	0	5	10.1	13.7	15.4	14.8	11.4	7.2	2	-2.4	41	30	30	37
Fsy	Oosteren	3	8	212.973	37	Bilowo11	54.3333	18.1667	250	-2.7	-2	2.9	8.9	14.6	18.1	19.5	18.9	14.9	10	3.9	-0.4	-6.7	-6.5	-2.9	1	5.5	9.2	11.2	10.6	7.8	4.3	0	-4.4	-4.7	-4.2	0	5	10.1	13.7	15.4	14.8	11.4	7.2	2	-2.4	41	30	30	37
Fsy	Oosteren	1	8	331.429	49	HorniPla	48.85	14	990	-1.9	-0.3	4.3	9.1	14.3	17.6	19.3	18.7	15.4	10	3.2	-0.4	-8.2	-7.5	-4.5	-0.9	3.6	7	8.6	8.4	5.5	1.2	-2.7	-6	-5.1	-3.9	-0.1	4.1	9	12.3	14	13.6	10.4	5.6	0.3	-3.2	89	71	80	71
Fsy	Oosteren	2	8	184	40	HorniPla	48.85	14	990	-1.9	-0.3	4.3	9.1	14.3	17.6	19.3	18.7	15.4	10	3.2	-0.4	-8.2	-7.5	-4.5	-0.9	3.6	7	8.6	8.4	5.5	1.2	-2.7	-6	-5.1	-3.9	-0.1	4.1	9	12.3	14	13.6	10.4	5.6	0.3	-3.2	89	71	80	71
Fsy	Oosteren	3	8	224	40	HorniPla	48.85	14	990	-1.9	-0.3	4.3	9.1	14.3	17.6	19.3	18.7	15.4	10	3.2	-0.4	-8.2	-7.5	-4.5	-0.9	3.6	7	8.6	8.4	5.5	1.2	-2.7	-6	-5.1	-3.9	-0.1	4.1	9	12.3	14	13.6	10.4	5.6	0.3	-3.2	89	71	80	71
Fsy	Oosteren	1	8	327.955	44	Nizbor	50	14	480	-0.7	1.5	6.5	11.8	17.2	20.1	22.1	21.5	17.6	12	4.9	0.9	-6.2	-4.9	-2	1.6	6.1	9.4	10.7	10.5	7.4	3.4	-1	-4.2	-3.5	-1.7	2.2	6.7	11.7	14.8	16.4	16	12.5	7.7	1.9	-1.7	27	24	29	36
Fsy	Oosteren	2	8	206.5	40	Nizbor	50	14	480	-0.7	1.5	6.5	11.8	17.2	20.1	22.1	21.5	17.6	12	4.9	0.9	-6.2	-4.9	-2	1.6	6.1	9.4	10.7	10.5	7.4	3.4	-1	-4.2	-3.5	-1.7	2.2	6.7	11.7	14.8	16.4	16	12.5	7.7	1.9	-1.7	27	24	29	36
Fsy	Oosteren	3	8	196.857	35	Nizbor	50	14	480	-0.7	1.5	6.5	11.8	17.2	20.1	22.1	21.5	17.6	12	4.9	0.9	-6.2	-4.9	-2	1.6	6.1	9.4	10.7	10.5	7.4	3.4	-1	-4.2	-3.5	-1.7	2.2	6.7	11.7	14.8	16.4	16	12.5	7.7	1.9	-1.7	27	24	29	36
Fsy	Oosteren	1	8	310	18	Plateaux	46.8	5.8333	600	2.5	4.4	8.7	12.7	16.6	20.5	22.9	22.2	19.4	13.7	7.5	3.1	-3.2	-2.1	0.1	3.4	6.7	10.1	12	11.7	9.5	5.4	1.2	-2	-0.3	1.2	4.4	8	11.7	15.3	17.5	17	14.4	9.6	4.4	0.6	146	128	124	118
Fsy	Oosteren	2	8	251.429	21	Plateaux	46.8	5.8333	600	2.5	4.4	8.7	12.7	16.6	20.5	22.9	22.2	19.4	13.7	7.5	3.1	-3.2	-2.1	0.1	3.4	6.7	10.1	12	11.7	9.5	5.4	1.2	-2	-0.3	1.2	4.4	8	11.7	15.3	17.5	17	14.4	9.6	4.4	0.6	146	128	124	118
Fsy	Oosteren	3	8	216.207	29	Plateaux	46.8	5.8333	600	2.5	4.4	8.7	12.7	16.6	20.5	22.9	22.2	19.4	13.7	7.5	3.1	-3.2	-2.1	0.1	3.4	6.7	10.1	12	11.7	9.5	5.4	1.2	-2	-0.3	1.2	4.4	8	11.7	15.3	17.5	17	14.4	9.6	4.4	0.6	146	128	124	118
Fsy	Oosteren	1	8	215.652	23	Soignes	50.8333	4.4167	110	4.2	6.3	9.3	13.5	17.8	21.4	22.2	21.8	20.1	15.3	8.6	5.3	-0.9	0.3	1.7	4.7	7.8	11	12.2	12.3	10.6	7.6	3.3	0.1	1.6	3.3	5.5	9.1	12.8	16.2	17.2	17.1	15.4	11.5	5.9	2.7	71	54	70	54
Fsy	Oosteren	2	8	226.207	29	Soignes	50.8333	4.4167	110	4.2	6.3	9.3	13.5	17.8	21.4	22.2	21.8	20.1	15.3	8.6	5.3	-0.9	0.3	1.7	4.7	7.8	11	12.2	12.3	10.6	7.6	3.3	0.1	1.6	3.3	5.5	9.1	12.8	16.2	17.2	17.1	15.4	11.5	5.9	2.7	71	54	70	54
Fsy	Oosteren	3	8	268.696	23	Soignes	50.8333	4.4167	110	4.2	6.3	9.3	13.5	17.8	21.4	22.2	21.8	20.1	15.3	8.6	5.3	-0.9	0.3	1.7	4.7	7.8	11	12.2	12.3	10.6	7.6	3.3	0.1	1.6	3.3	5.5	9.1	12.8	16.2	17.2	17.1	15.4	11.5	5.9	2.7	71	54	70	54
Fsy	Oosteren	1	8	279.062	32	Torup	55.5667	13.2	40	1.9	2.1	4.9	9	14.6	18.9	19.8	19.6	16.2	11.8	7	3.3	-2.6	-2.7	-0.8	2.1	7.1	11.3	12.8	12.3	9.9	6.7	1.3	-0.5	-0.4	-0.3	2	5.5	10.8	15.1	16.3	15.9	13	9.2	4.1	1.4	55	34	44	36
Fsy	Oosteren	2	8	300.75	40	Torup	55.5667	13.2	40	1.9	2.1	4.9	9	14.6	18.9	19.8	19.6	16.2	11.8	7	3.3	-2.6	-2.7	-0.8	2.1	7.1	11.3	12.8	12.3	9.9	6.7	1.3	-0.5	-0.4	-0.3	2	5.5	10.8	15.1	16.3	15.9	13	9.2	4.1	1.4	55	34	44	36
Fsy	Oosteren	3	8	182.778	36	Torup	55.5667	13.2	40	1.9	2.1	4.9	9	14.6	18.9	19.8	19.6	16.2	11.8	7	3.3	-2.6	-2.7	-0.8	2.1	7.1	11.3	12.8	12.3	9.9	6.7	1.3	-0.5	-0.4	-0.3	2	5.5	10.8	15.1	16.3	15.9	13	9.2	4.1	1.4	55	34	44	36
Fsy	Oosteren	1	8	318.4	50	UrachBW	48.4667	9.45	760	0.7	2.6	6.7	11	15.6	19	21.2	20.5	18	12.5	5.8	1.7	-4.9	-3.9	-1.8	1.5	5.4	8.9	10.7	10.1	7.7	3.7	-0.6	-3.7	-2.1	-0.7	2.5	6.3	10.5	14	15.9	15.3	12.8	8.1	2.6	-1	66	57	57	84
Fsy	Oosteren	2	8	287.872	47	UrachBW	48.4667	9.45	760	0.7	2.6	6.7	11	15.6	19	21.2	20.5	18	12.5	5.8	1.7	-4.9	-3.9	-1.8	1.5	5.4	8.9	10.7	10.1	7.7	3.7	-0.6	-3.7	-2.1	-0.7	2.5	6.3	10.5	14	15.9	15.3	12.8	8.1	2.6	-1	66	57	57	84
Fsy	Oosteren	3	8	324.318	44	UrachBW	48.4667	9.45	760	0.7	2.6	6.7	11	15.6	19	21.2	20.5	18	12.5	5.8	1.7	-4.9	-3.9	-1.8	1.5	5.4	8.9	10.7	10.1	7.7	3.7	-0.6	-3.7	-2.1	-0.7	2.5	6.3	10.5	14	15.9	15.3	12.8	8.1	2.6	-1	66	57	57	84
Fsy	Oosteren	1	8	321.935	31	Westfiel	57.4	-2.75	10	6.3	6.1	8.6	10.9	13.5	16.8	17.9	17.6	15.7	13	8.4	7	0.3	-0.1	1.4	2.8	5.6	8.6	9.9	9.6	8.1	5.8	2.2	1.2	3.3	3	5	6.9	9.5	12.7	13.9	13.6	11.9	9.4	5.3	4.1	80	59	62	53
Fsy	Oosteren	2	8	254.359	39	Westfiel	57.4	-2.75	10	6.3	6.1	8.6	10.9	13.5	16.8	17.9	17.6	15.7	13	8.4	7	0.3	-0.1	1.4	2.8	5.6	8.6	9.9	9.6	8.1	5.8	2.2	1.2	3.3	3	5	6.9	9.5	12.7	13.9	13.6	11.9	9.4	5.3	4.1	80	59	62	53
Fsy	Oosteren	3	8	338.75	24	Westfiel	57.4	-2.75	10	6.3	6.1	8.6	10.9	13.5	16.8	17.9	17.6	15.7	13	8.4	7	0.3	-0.1	1.4	2.8	5.6	8.6	9.9	9.6	8.1	5.8	2.2	1.2	3.3	3	5	6.9	9.5	12.7	13.9	13.6	11.9	9.4	5.3	4.1	80	59	62	53
Fsy	Straza	1	8	273.333	45	Aarnink	51.9333	6.7333	45	4.1	5.1	8.4	12.7	17.2	20.5	21.8	21.8	18.9	14.5	8.3	5	-1	-0.7	2.3	4	7.7	10.6	12.2	12	9.9	6.9	2.9	0.4	1.6	2.2	5.3	8.3	12.5	15.5	17	16.9	14.4	10.7	5.6	2.7	67	45	62	52
Fsy	Straza	2	8	261.795	39	Aarnink	51.9333	6.7333	45	4.1	5.1	8.4	12.7	17.2	20.5	21.8	21.8	18.9	14.5	8.3	5	-1	-0.7	2.3	4	7.7	10.6	12.2	12	9.9	6.9	2.9	0.4	1.6	2.2	5.3	8.3	12.5	15.5	17	16.9	14.4	10.7	5.6	2.7	67	45	62	52
Fsy	Straza	3	8	260.4	45	Aarnink	51.9333	6.7333	45	4.1	5.1	8.4	12.7	17.2	20.5	21.8	21.8	18.9	14.5	8.3	5	-1	-0.7	2.3	4	7.7	10.6	12.2	12	9.9	6.9	2.9	0.4	1.6	2.2	5.3	8.3	12.5	15.5	17	16.9	14.4	10.7	5.6	2.7	67	45	62	52
Fsy	Straza	1	8	242.857	42	Bilowo11	54.3333	18.1667	250	-2.7	-2	2.9	8.9	14.6	18.1	19.5	18.9	14.9	10	3.9	-0.4	-6.7	-6.5	-2.9	1	5.5	9.2	11.2	10.6	7.8	4.3	0	-4.4	-4.7	-4.2	0	5	10.1	13.7	15.4	14.8	11.4	7.2	2	-2.4	41	30	30	37
Fsy	Straza	2	8			Bilowo11	54.3333	18.1667	250	-2.7	-2	2.9	8.9	14.6	18.1	19.5	18.9	14.9	10	3.9	-0.4	-6.7	-6.5	-2.9	1	5.5	9.2	11.2	10.6	7.8	4.3	0	-4.4	-4.7	-4.2	0	5	10.1	13.7	15.4	14.8	11.4	7.2	2	-2.4	41	30	30	37
Fsy	Straza	3	8	252.5	10	Bilowo11	54.3333	18.1667	250	-2.7	-2	2.9	8.9	14.6	18.1	19.5	18.9	14.9	10	3.9	-0.4	-6.7	-6.5	-2.9	1	5.5	9.2	11.2	10.6	7.8	4.3	0	-4.4	-4.7	-4.2	0	5	10.1	13.7	15.4	14.8	11.4	7.2	2	-2.4	41	30	30	37
Fsy	Straza	1	8	257.647	17	HorniPla	48.85	14	990	-1.9	-0.3	4.3	9.1	14.3	17.6	19.3	18.7	15.4	10	3.2	-0.4	-8.2	-7.5	-4.5	-0.9	3.6	7	8.6	8.4	5.5	1.2	-2.7	-6	-5.1	-3.9	-0.1	4.1	9	12.3	14	13.6	10.4	5.6	0.3	-3.2	89	71	80	71
Fsy	Straza	2	8	271.852	27	HorniPla	48.85	14	990	-1.9	-0.3	4.3	9.1	14.3	17.6	19.3	18.7	15.4	10	3.2	-0.4	-8.2	-7.5	-4.5	-0.9	3.6	7	8.6	8.4	5.5	1.2	-2.7	-6	-5.1	-3.9	-0.1	4.1	9	12.3	14	13.6	10.4	5.6	0.3	-3.2	89	71	80	71
Fsy	Straza	3	8	259.655	29	HorniPla	48.85	14	990	-1.9	-0.3	4.3	9.1	14.3	17.6	19.3	18.7	15.4	10	3.2	-0.4	-8.2	-7.5	-4.5	-0.9	3.6	7	8.6	8.4	5.5	1.2	-2.7	-6	-5.1	-3.9	-0.1	4.1	9	12.3	14	13.6	10.4	5.6	0.3	-3.2	89	71	80	71
Fsy	Straza	1	8	262.81	21	Nizbor	50	14	480	-0.7	1.5	6.5	11.8	17.2	20.1	22.1	21.5	17.6	12	4.9	0.9	-6.2	-4.9	-2	1.6	6.1	9.4	10.7	10.5	7.4	3.4	-1	-4.2	-3.5	-1.7	2.2	6.7	11.7	14.8	16.4	16	12.5	7.7	1.9	-1.7	27	24	29	36
Fsy	Straza	2	8	240.208	24	Nizbor	50	14	480	-0.7	1.5	6.5	11.8	17.2	20.1	22.1	21.5	17.6	12	4.9	0.9	-6.2	-4.9	-2	1.6	6.1	9.4	10.7	10.5	7.4	3.4	-1	-4.2	-3.5	-1.7	2.2	6.7	11.7	14.8	16.4	16	12.5	7.7	1.9	-1.7	27	24	29	36
Fsy	Straza	3	8	281.069	29	Nizbor	50	14	480	-0.7	1.5	6.5	11.8	17.2	20.1	22.1	21.5	17.6	12	4.9	0.9	-6.2	-4.9	-2	1.6	6.1	9.4	10.7	10.5	7.4	3.4	-1	-4.2	-3.5	-1.7	2.2	6.7	11.7	14.8	16.4	16	12.5	7.7	1.9	-1.7	27	24	29	36
Fsy	Straza	1	8			Plateaux	46.8	5.8333	600	2.5	4.4	8.7	12.7	16.6	20.5	22.9	22.2	19.4	13.7	7.5	3.1	-3.2	-2.1	0.1	3.4	6.7	10.1	12	11.7	9.5	5.4	1.2	-2	-0.3	1.2	4.4	8	11.7	15.3	17.5	17	14.4	9.6	4.4	0.6	146	128	124	118
Fsy	Straza	2	8			Plateaux	46.8	5.8333	600	2.5	4.4	8.7	12.7	16.6	20.5	22.9	22.2	19.4	13.7	7.5	3.1	-3.2	-2.1	0.1	3.4	6.7	10.1	12	11.7	9.5	5.4	1.2	-2	-0.3	1.2	4.4	8	11.7	15.3	17.5	17	14.4	9.6	4.4	0.6	146	128	124	118
Fsy	Straza	3	8	257.568	37	Plateaux	46.8	5.8333	600	2.5	4.4	8.7	12.7	16.6	20.5	22.9	22.2	19.4	13.7	7.5	3.1	-3.2	-2.1	0.1	3.4	6.7	10.1	12	11.7	9.5	5.4	1.2	-2	-0.3	1.2	4.4	8	11.7	15.3	17.5	17	14.4	9.6	4.4	0.6	146	128	124	118
Fsy	Straza	1	8	261.458	48	Soignes	50.8333	4.4167	110	4.2	6.3	9.3	13.5	17.8	21.4	22.2	21.8	20.1	15.3	8.6	5.3	-0.9	0.3	1.7	4.7	7.8	11	12.2	12.3	10.6	7.6	3.3	0.1	1.6	3.3	5.5	9.1	12.8	16.2	17.2	17.1	15.4	11.5	5.9	2.7	71	54	70	54
Fsy	Straza	2	8	248.111	45	Soignes	50.8333	4.4167	110	4.2	6.3	9.3	13.5	17.8	21.4	22.2	21.8	20.1	15.3	8.6	5.3	-0.9	0.3	1.7	4.7	7.8	11	12.2	12.3	10.6	7.6	3.3	0.1	1.6	3.3	5.5	9.1	12.8	16.2	17.2	17.1	15.4	11.5	5.9	2.7	71	54	70	54
Fsy	Straza	3	8	241.077	39	Soignes	50.8333	4.4167	110	4.2	6.3	9.3	13.5	17.8	21.4	22.2	21.8	20.1	15.3	8.6	5.3	-0.9	0.3	1.7	4.7	7.8	11	12.2	12.3	10.6	7.6	3.3	0.1	1.6	3.3	5.5	9.1	12.8	16.2	17.2	17.1	15.4	11.5	5.9	2.7	71	54	70	54
Fsy	Straza	1	8	217.955	44	Torup	55.5667	13.2	40	1.9	2.1	4.9	9	14.6	18.9	19.8	19.6	16.2	11.8	7	3.3	-2.6	-2.7	-0.8	2.1	7.1	11.3	12.8	12.3	9.9	6.7	1.3	-0.5	-0.4	-0.3	2	5.5	10.8	15.1	16.3	15.9	13	9.2	4.1	1.4	55	34	44	36
Fsy	Straza	2	8	218.75	48	Torup	55.5667	13.2	40	1.9	2.1	4.9	9	14.6	18.9	19.8	19.6	16.2	11.8	7	3.3	-2.6	-2.7	-0.8	2.1	7.1	11.3	12.8	12.3	9.9	6.7	1.3	-0.5	-0.4	-0.3	2	5.5	10.8	15.1	16.3	15.9	13	9.2	4.1	1.4	55	34	44	36
Fsy	Straza	3	8	239.39	41	Torup	55.5667	13.2	40	1.9	2.1	4.9	9	14.6	18.9	19.8	19.6	16.2	11.8	7	3.3	-2.6	-2.7	-0.8	2.1	7.1	11.3	12.8	12.3	9.9	6.7	1.3	-0.5	-0.4	-0.3	2	5.5	10.8	15.1	16.3	15.9	13	9.2	4.1	1.4	55	34	44	36
Fsy	Straza	1	8	232	28	UrachBW	48.4667	9.45	760	0.7	2.6	6.7	11	15.6	19	21.2	20.5	18	12.5	5.8	1.7	-4.9	-3.9	-1.8	1.5	5.4	8.9	10.7	10.1	7.7	3.7	-0.6	-3.7	-2.1	-0.7	2.5	6.3	10.5	14	15.9	15.3	12.8	8.1	2.6	-1	66	57	57	84
Fsy	Straza	2	8	233.721	43	UrachBW	48.4667	9.45	760	0.7	2.6	6.7	11	15.6	19	21.2	20.5	18	12.5	5.8	1.7	-4.9	-3.9	-1.8	1.5	5.4	8.9	10.7	10.1	7.7	3.7	-0.6	-3.7	-2.1	-0.7	2.5	6.3	10.5	14	15.9	15.3	12.8	8.1	2.6	-1	66	57	57	84
Fsy	Straza	3	8	233.906	32	UrachBW	48.4667	9.45	760	0.7	2.6	6.7	11	15.6	19	21.2	20.5	18	12.5	5.8	1.7	-4.9	-3.9	-1.8	1.5	5.4	8.9	10.7	10.1	7.7	3.7	-0.6	-3.7	-2.1	-0.7	2.5	6.3	10.5	14	15.9	15.3	12.8	8.1	2.6	-1	66	57	57	84
Fsy	Straza	1	8	240.733	45	Westfiel	57.4	-2.75	10	6.3	6.1	8.6	10.9	13.5	16.8	17.9	17.6	15.7	13	8.4	7	0.3	-0.1	1.4	2.8	5.6	8.6	9.9	9.6	8.1	5.8	2.2	1.2	3.3	3	5	6.9	9.5	12.7	13.9	13.6	11.9	9.4	5.3	4.1	80	59	62	53
Fsy	Straza	2	8	242.628	43	Westfiel	57.4	-2.75	10	6.3	6.1	8.6	10.9	13.5	16.8	17.9	17.6	15.7	13	8.4	7	0.3	-0.1	1.4	2.8	5.6	8.6	9.9	9.6	8.1	5.8	2.2	1.2	3.3	3	5	6.9	9.5	12.7	13.9	13.6	11.9	9.4	5.3	4.1	80	59	62	53
Fsy	Straza	3	8	220.837	43	Westfiel	57.4	-2.75	10	6.3	6.1	8.6	10.9	13.5	16.8	17.9	17.6	15.7	13	8.4	7	0.3	-0.1	1.4	2.8	5.6	8.6	9.9	9.6	8.1	5.8	2.2	1.2	3.3	3	5	6.9	9.5	12.7	13.9	13.6	11.9	9.4	5.3	4.1	80	59	62	53
Pab	19_Kryni	7	16	494.9		700_COSN	47.3333	25.1667	1025	-3	-1.1	4.1	11.2	15.9	18.8	20.6	20.5	17.4	11.7	4.8	-0.6	-11.6	-8.9	-5.2	-0.1	4.5	7.9	9.5	9.2	5.4	0.4	-2.4	-7.2	-7.3	-5	-0.5	5.6	10.2	13.3	15.1	14.9	11.4	6	1.2	-3.9	37	39	36	53
Pab	19_Kryni	7	16	474.2		702_NOVE	48.8333	14.8	500	-0.2	1.8	7.1	13.2	18	21.1	23	22.4	18.8	12.5	5.6	1.5	-6.8	-5.7	-2.5	2.3	6.2	9.7	11.4	10.9	7.8	3.1	-0.4	-3.8	-3.5	-2	2.3	7.8	12.1	15.4	17.2	16.6	13.3	7.8	2.6	-1.2	41	46	44	53
Pab	19_Kryni	7	16	332.2		708_TAVE	46.3	7.11667	1600	-1.8	-0.8	2.9	7.1	11.1	15	17.2	16	13.9	8.8	3.1	-0.4	-8.7	-7.9	-5	-1.6	1.9	5.5	7.4	7	5.4	1.2	-3.1	-6.6	-5.3	-4.4	-1.1	2.8	6.5	10.2	12.3	11.5	9.6	5	0	-3.5	138	129	118	115
Pab	19_Kryni	7	16	413.8		711_ZWIN	49.7333	8.61667	500	0.6	2.6	8.2	13.5	17.5	20.8	22.3	21.1	18.6	12.5	5.8	1.6	-5.2	-4	-1.7	2.9	6.1	9.6	11.1	10.6	8	3.6	0.2	-3.4	-2.3	-0.7	3.2	8.2	11.8	15.2	16.7	15.8	13.3	8.1	3	-0.9	52	45	36	41
Pab	19_Kryni	7	16	473.1		713_LIPT	48.9333	19.85	1125	-3.2	-1.9	1.7	8.1	12.6	16.1	18	17.7	15	9.9	3.1	-1.3	-10.9	-9.2	-6.5	-1.2	3.3	6.7	8.2	8	5	0.9	-2.6	-7.2	-7.1	-5.5	-2.4	3.5	7.9	11.4	13.1	12.9	10	5.4	0.3	-4.2	65	66	65	83
Pab	19_Kryni	7	16	377.2		714_MORA	49.75	16.6667	570	-1.9	0.7	5.3	12	16.3	19.5	21.3	20.7	17.7	11.9	4.9	-0.2	-8	-6	-3.1	1.5	5.5	8.8	9.9	9.7	7.3	3.3	-0.4	-5	-5	-2.6	1.1	6.7	10.9	14.2	15.6	15.2	12.5	7.6	2.2	-2.6	25	30	29	39
Pab	19_Kryni	7	16	362.9		717_CRES	46.5167	8.63333	1120	0.7	1.6	5.1	9.3	13.4	16.9	19.1	18.1	16	11.3	5.7	2.6	-5.5	-4.8	-2.2	1.1	4.6	8.3	10.4	9.7	8	3.9	-0.3	-3.6	-2.4	-1.6	1.4	5.2	9	12.6	14.8	13.9	12	7.6	2.7	-0.5	83	81	96	141
Pab	19_Kryni	7	16	394.2		721_BURG	48.1667	12.8167	500	0.5	2.8	8.4	13.9	17.7	21.2	22.9	22.2	19.6	13.4	6.5	1.7	-7	-5.6	-1.9	2.9	6.5	9.9	11.6	11.2	8.7	3.7	-0.2	-4.5	-3.3	-1.4	3.3	8.4	12.1	15.6	17.2	16.7	14.1	8.5	3.1	-1.4	60	51	55	70
Pab	19_Kryni	7	16	380.9		723_BADE	48.7667	8.23333	500	1.3	3.8	8.7	13.7	17.6	21	23.2	22.1	19.6	13.6	6.7	2.6	-4.6	-3.2	-1	3.1	6.5	9.8	11.6	11.1	8.7	4.3	0.3	-3	-1.7	0.3	3.9	8.4	12.1	15.4	17.4	16.6	14.2	9	3.5	-0.2	80	61	56	64
Pab	19_Kryni	7	16	403.2		730_KLAS	48.9667	18.8667	700	-2.5	0.6	5.6	12.4	16.7	20	21.9	21.5	18.4	12.5	4.7	-0.8	-10.6	-7.8	-4.2	0.8	4.8	8.1	9.2	8.8	6.2	2	-1.4	-6.6	-6.5	-3.6	0.7	6.6	10.7	14	15.6	15.1	12.3	7.3	1.6	-3.7	45	52	46	58
Pab	19_Kryni	7	16	324.7		733_OEST	60.5	11	275	-5.2	-4.2	1.3	7.1	13.9	18.5	20.2	18.5	13.6	7.5	1	-2.7	-11	-11.1	-6.8	-1.6	3.5	8.3	10.3	9.3	5.7	1.5	-3.7	-7.9	-8.1	-7.6	-2.7	2.8	8.7	13.4	15.2	13.9	9.6	4.5	-1.3	-5.3	44	38	25	40
Pab	19_Kryni	7	16	393.1		734_BOGS	59.9667	10.65	160	-3.3	-2.5	2.6	8.4	14.9	19.5	21	19.6	14.7	8.8	2.5	-0.9	-8.7	-8.9	-5	-0.2	5	9.8	11.6	11	7.4	3.1	-1.9	-5.6	-6	-5.7	-1.2	4.1	10	14.6	16.3	15.3	11	6	0.3	-3.2	49	40	27	44
Pab	19_Kryni	7	16	460.9		735_KNIT	47.2	14.8167	1300	-4.8	-1.6	3.4	8.7	13.2	16.8	18.5	17.7	14.3	8.4	1.3	-3.9	-12.7	-10.7	-7.1	-2.1	2	5.6	6.8	6.1	3.3	-1.5	-5.4	-10	-8.8	-6.1	-1.8	3.3	7.6	11.2	12.7	11.9	8.8	3.4	-2	-7	32	32	36	48
Pab	19_Kryni	7	16	376.1		743_WITE	55.0833	30.1667	150	-6	-4.1	0.4	9.9	18	21.4	22.7	21.6	16.3	9.3	2.2	-2.6	-12.9	-11.5	-7.4	0.7	6.7	10.6	12.1	11.3	6.8	2.4	-2.6	-8	-9.4	-7.8	-3.5	5.3	12.4	16	17.4	16.4	11.5	5.8	-0.2	-5.3	36	30	33	41
Pab	19_Kryni	7	16	414.8		744_TERE	56.5	32	200	-6.9	-5.6	-1.1	8.6	16.7	21.1	22.4	21	15.2	8.1	1	-3.3	-14.1	-13.6	-10.1	-1.1	4.9	9.4	11	10.4	5.7	1.5	-4.2	-9.2	-10.5	-9.6	-5.6	3.8	10.8	15.3	16.7	15.7	10.4	4.8	-1.6	-6.3	31	27	25	42
Pab	19_Kryni	7	16	406.9		746_WISM	53.8333	11.3333	100	1.2	1.6	5.3	10.4	15.3	19.4	20.9	20.4	18.2	12.5	6.8	3.3	-4	-4	-1.9	2.6	6.4	10.4	12.5	12.3	10	6.2	2.1	-1	-1.4	-1.2	1.7	6.5	10.9	14.9	16.7	16.4	14.1	9.4	4.5	1.1	49	41	34	42
Pab	19_Kryni	7	16	481.1		749_CUCU	47.3333	25	1410	-4.6	-2.5	2.3	8.9	13.2	16	17.8	17.8	15.1	9.6	2.8	-2.4	-13.6	-10.6	-7.1	-2.3	2.2	5.4	6.9	6.8	3.3	-1.6	-4.5	-9.3	-9.1	-6.6	-2.4	3.3	7.7	10.7	12.3	12.3	9.2	4	-0.8	-5.8	40	42	37	55
Pab	19_Kryni	7	16	466.8		754_HRAB	48.9833	20.1833	900	-2.4	-0.4	3.7	10.5	15	18.4	20.2	19.9	17.1	11.8	4.3	-0.8	-11.2	-8.8	-5.5	-0.2	4.2	7.5	8.9	8.4	5.4	1	-2.3	-7.4	-6.8	-4.6	-0.9	5.2	9.6	12.9	14.6	14.1	11.3	6.4	1	-4.1	36	37	39	55
Pab	19_Kryni	7	16	520.8		755_MARG	47.75	25.75	670	-2.6	-0.6	4.6	12.8	17.9	21.1	22.5	22.3	18.9	12.4	5.6	0.2	-10.4	-8	-4.3	1.3	6.3	9.8	11.6	11.2	7.2	2	-1.2	-6.1	-6.5	-4.3	0.2	7.1	12.1	15.5	17.1	16.7	13.1	7.2	2.2	-2.9	33	33	31	49
Pab	19_Kryni	7	16	391		756_VERI	58.0833	27.4167	30	-6	-5	-0.3	8	16	20.4	22	20.4	15.4	8.6	1.6	-2.5	-11.8	-11.3	-7.8	0.1	5.8	10.4	12.2	11.4	7.4	3	-2	-7	-8.9	-8.2	-4.1	4	10.9	15.4	17.1	15.9	11.4	5.8	-0.2	-4.8	33	29	28	39
Pab	19_Kryni	7	16	402.1		758_VORA	47.4	15.8833	1200	-4	-1.3	3.5	9.1	13.6	16.8	18.7	17.9	14.6	9	1.9	-2.6	-11.3	-9.2	-6.3	-1.5	2.6	6	7.3	6.8	3.9	-0.6	-4.3	-8.3	-7.6	-5.2	-1.4	3.8	8.1	11.4	13	12.4	9.3	4.2	-1.2	-5.5	35	44	42	56
Pab	19_Kryni	7	16	423.8		759_VEIT	47.65	15.5833	1000	-2.9	-0.3	4.2	10	14.7	17.9	19.8	19	15.5	9.8	3.1	-1.5	-9.8	-8	-5.1	-0.4	3.7	7.2	8.7	8.1	5.2	0.7	-2.9	-6.8	-6.4	-4.1	-0.5	4.8	9.2	12.5	14.2	13.6	10.4	5.3	0.1	-4.2	70	55	52	59
Pab	19_Kryni	7	16	467.8		764_PRZE	54.1667	21.95	150	-4.5	-3.5	2.5	11.5	17.6	21.1	22.8	22	17.9	11.5	3.9	-0.8	-10	-9.3	-4.3	2.7	7.1	10.4	12.7	12	8.8	4.4	-0.5	-5.5	-7.3	-6.4	-0.9	7.1	12.4	15.8	17.7	17	13.4	8	1.7	-3.2	41	33	31	44
Pab	19_Kryni	7	16	466.2		765_STUE	47.3333	15.6	640	-1.1	1.4	5.9	11.9	16.9	20.3	21.9	21.5	17.8	11.9	5.1	0.6	-7.6	-6.1	-3	1.8	6	9.5	11	10.6	7.5	2.9	-0.5	-4.4	-4.3	-2.4	1.5	6.9	11.5	14.9	16.5	16	12.7	7.4	2.3	-1.9	46	51	52	57
Pab	19_Kryni	7	16	432.9		766_DOBR	49.7833	14.2	420	-0.6	1.7	6.9	13.2	18.1	21.4	23.3	22.6	19	12.7	5.3	1.2	-6.4	-5.1	-2	2.5	6.7	10.2	11.8	11.3	8.3	3.6	-0.3	-3.9	-3.5	-1.7	2.5	7.9	12.4	15.8	17.5	17	13.6	8.2	2.5	-1.3	29	28	31	38
Pab	19_Kryni	7	16	283.9		768_VALL	62.3333	14.1333	450	-6.2	-4.9	0.3	5.6	11.9	17	18.6	17.1	12.2	6.2	0.3	-3	-13.5	-12.9	-8.9	-3.3	1.7	6.9	9	8.3	4.9	0.5	-4.7	-9	-9.9	-8.9	-4.3	1.2	6.8	11.9	13.8	12.7	8.5	3.4	-2.2	-6	41	30	31	39
Pab	19_Kryni	7	16	409		770_VAL_	46.2833	11.4667	1100	-0.1	2.7	7.2	12.5	16.2	20.3	22.6	21.4	19.3	12.4	5.9	1.5	-8.1	-6	-2.4	2	5.2	8.8	10.3	10.1	8.2	2.8	-1	-5.5	-4.1	-1.6	2.4	7.2	10.7	14.6	16.5	15.7	13.7	7.6	2.4	-2	47	37	43	57
Pab	19_Kryni	7	16	467.8		773_JASI	48.25	24.3333	700	-2.5	-0.6	4.3	12.2	17.2	20.5	22.2	21.9	18.4	12.4	5.4	0.3	-9.5	-7	-3.4	2	6.3	9.6	11.1	10.9	7.1	2.3	-0.9	-5.1	-6	-3.8	0.4	7.1	11.8	15.1	16.7	16.4	12.8	7.3	2.2	-2.4	46	51	43	60
Pab	19_Kryni	7	16	317.8		778_BORO	42.25	23.5833	1300	-0.5	0.9	4	9.5	14.5	18.2	20.8	21.1	17.7	12.3	7.1	2.3	-7.3	-6	-4.2	-0.1	4.4	7.8	9.5	10	7	2.9	0	-4	-3.9	-2.5	-0.1	4.7	9.4	13	15.1	15.5	12.4	7.6	3.5	-0.8	69	51	54	60
Pab	19_Kryni	7	16	316.8		779_URJA	61.1	23.5	100	-5.4	-4.7	-0.3	6.7	14.4	19.7	21.3	19.2	13.7	7.5	1.7	-2	-11.9	-12.1	-9.1	-1.7	3.2	8.6	10.8	9.9	6.3	2.1	-2.6	-7.3	-8.7	-8.4	-4.7	2.5	8.8	14.2	16	14.5	10	4.8	-0.4	-4.7	37	28	23	32
Pab	19_Kryni	7	16	336.9		790_MALI	47.5	9.83333	600	0.5	3.2	8.1	13.3	17.3	20.9	22.3	21.3	18.8	12.9	6.6	1.8	-6.1	-4.7	-1.3	3.1	6.4	10	11.7	10.9	8.6	4.3	-0.1	-4.2	-2.8	-0.8	3.4	8.2	11.8	15.4	17	16.1	13.7	8.6	3.3	-1.2	117	105	102	124
Pab	19_Kryni	7	16	418		796_BUEK	48.0667	20.6333	615	-2.1	1.3	6.5	13.7	18.4	21.6	23.7	23.1	19.9	13.7	6.1	0.6	-8.9	-6	-3.1	2.2	6.7	10.3	11.6	11.1	7.8	2.6	-0.2	-5	-5.5	-2.3	1.7	8	12.6	15.9	17.7	17.1	13.9	8.2	2.9	-2.2	40	41	35	52
Pab	19_Kryni	7	16	426		798_GURK	46.8667	14.2833	1300	-4.7	-1.4	3.5	8.6	13.3	16.9	18.7	18	14.7	8.6	1.5	-3.4	-12.5	-10.3	-6.6	-1.9	2.1	5.8	7	6.3	3.8	-1	-4.8	-9.5	-8.6	-5.9	-1.5	3.4	7.7	11.4	12.9	12.1	9.2	3.8	-1.6	-6.4	33	36	39	62
Pab	20_Nyirj	7	16	1023.9	23	700_COSN	47.3333	25.1667	1025	-3	-1.1	4.1	11.2	15.9	18.8	20.6	20.5	17.4	11.7	4.8	-0.6	-11.6	-8.9	-5.2	-0.1	4.5	7.9	9.5	9.2	5.4	0.4	-2.4	-7.2	-7.3	-5	-0.5	5.6	10.2	13.3	15.1	14.9	11.4	6	1.2	-3.9	37	39	36	53
Pab	20_Nyirj	7	16	1009.8	22	702_NOVE	48.8333	14.8	500	-0.2	1.8	7.1	13.2	18	21.1	23	22.4	18.8	12.5	5.6	1.5	-6.8	-5.7	-2.5	2.3	6.2	9.7	11.4	10.9	7.8	3.1	-0.4	-3.8	-3.5	-2	2.3	7.8	12.1	15.4	17.2	16.6	13.3	7.8	2.6	-1.2	41	46	44	53
Pab	20_Nyirj	7	16	748.3	21	708_TAVE	46.3	7.11667	1600	-1.8	-0.8	2.9	7.1	11.1	15	17.2	16	13.9	8.8	3.1	-0.4	-8.7	-7.9	-5	-1.6	1.9	5.5	7.4	7	5.4	1.2	-3.1	-6.6	-5.3	-4.4	-1.1	2.8	6.5	10.2	12.3	11.5	9.6	5	0	-3.5	138	129	118	115
Pab	20_Nyirj	7	16	900	23	711_ZWIN	49.7333	8.61667	500	0.6	2.6	8.2	13.5	17.5	20.8	22.3	21.1	18.6	12.5	5.8	1.6	-5.2	-4	-1.7	2.9	6.1	9.6	11.1	10.6	8	3.6	0.2	-3.4	-2.3	-0.7	3.2	8.2	11.8	15.2	16.7	15.8	13.3	8.1	3	-0.9	52	45	36	41
Pab	20_Nyirj	7	16	1005.2	23	713_LIPT	48.9333	19.85	1125	-3.2	-1.9	1.7	8.1	12.6	16.1	18	17.7	15	9.9	3.1	-1.3	-10.9	-9.2	-6.5	-1.2	3.3	6.7	8.2	8	5	0.9	-2.6	-7.2	-7.1	-5.5	-2.4	3.5	7.9	11.4	13.1	12.9	10	5.4	0.3	-4.2	65	66	65	83
Pab	20_Nyirj	7	16	1001.6	25	714_MORA	49.75	16.6667	570	-1.9	0.7	5.3	12	16.3	19.5	21.3	20.7	17.7	11.9	4.9	-0.2	-8	-6	-3.1	1.5	5.5	8.8	9.9	9.7	7.3	3.3	-0.4	-5	-5	-2.6	1.1	6.7	10.9	14.2	15.6	15.2	12.5	7.6	2.2	-2.6	25	30	29	39
Pab	20_Nyirj	7	16	884.1	23	717_CRES	46.5167	8.63333	1120	0.7	1.6	5.1	9.3	13.4	16.9	19.1	18.1	16	11.3	5.7	2.6	-5.5	-4.8	-2.2	1.1	4.6	8.3	10.4	9.7	8	3.9	-0.3	-3.6	-2.4	-1.6	1.4	5.2	9	12.6	14.8	13.9	12	7.6	2.7	-0.5	83	81	96	141
Pab	20_Nyirj	7	16	942.6	23	721_BURG	48.1667	12.8167	500	0.5	2.8	8.4	13.9	17.7	21.2	22.9	22.2	19.6	13.4	6.5	1.7	-7	-5.6	-1.9	2.9	6.5	9.9	11.6	11.2	8.7	3.7	-0.2	-4.5	-3.3	-1.4	3.3	8.4	12.1	15.6	17.2	16.7	14.1	8.5	3.1	-1.4	60	51	55	70
Pab	20_Nyirj	7	16	888.8	24	723_BADE	48.7667	8.23333	500	1.3	3.8	8.7	13.7	17.6	21	23.2	22.1	19.6	13.6	6.7	2.6	-4.6	-3.2	-1	3.1	6.5	9.8	11.6	11.1	8.7	4.3	0.3	-3	-1.7	0.3	3.9	8.4	12.1	15.4	17.4	16.6	14.2	9	3.5	-0.2	80	61	56	64
Pab	20_Nyirj	7	16	997	22	730_KLAS	48.9667	18.8667	700	-2.5	0.6	5.6	12.4	16.7	20	21.9	21.5	18.4	12.5	4.7	-0.8	-10.6	-7.8	-4.2	0.8	4.8	8.1	9.2	8.8	6.2	2	-1.4	-6.6	-6.5	-3.6	0.7	6.6	10.7	14	15.6	15.1	12.3	7.3	1.6	-3.7	45	52	46	58
Pab	20_Nyirj	7	16	835.5	21	733_OEST	60.5	11	275	-5.2	-4.2	1.3	7.1	13.9	18.5	20.2	18.5	13.6	7.5	1	-2.7	-11	-11.1	-6.8	-1.6	3.5	8.3	10.3	9.3	5.7	1.5	-3.7	-7.9	-8.1	-7.6	-2.7	2.8	8.7	13.4	15.2	13.9	9.6	4.5	-1.3	-5.3	44	38	25	40
Pab	20_Nyirj	7	16	865.2	21	734_BOGS	59.9667	10.65	160	-3.3	-2.5	2.6	8.4	14.9	19.5	21	19.6	14.7	8.8	2.5	-0.9	-8.7	-8.9	-5	-0.2	5	9.8	11.6	11	7.4	3.1	-1.9	-5.6	-6	-5.7	-1.2	4.1	10	14.6	16.3	15.3	11	6	0.3	-3.2	49	40	27	44
Pab	20_Nyirj	7	16	961.3	23	735_KNIT	47.2	14.8167	1300	-4.8	-1.6	3.4	8.7	13.2	16.8	18.5	17.7	14.3	8.4	1.3	-3.9	-12.7	-10.7	-7.1	-2.1	2	5.6	6.8	6.1	3.3	-1.5	-5.4	-10	-8.8	-6.1	-1.8	3.3	7.6	11.2	12.7	11.9	8.8	3.4	-2	-7	32	32	36	48
Pab	20_Nyirj	7	16	900.8	20	743_WITE	55.0833	30.1667	150	-6	-4.1	0.4	9.9	18	21.4	22.7	21.6	16.3	9.3	2.2	-2.6	-12.9	-11.5	-7.4	0.7	6.7	10.6	12.1	11.3	6.8	2.4	-2.6	-8	-9.4	-7.8	-3.5	5.3	12.4	16	17.4	16.4	11.5	5.8	-0.2	-5.3	36	30	33	41
Pab	20_Nyirj	7	16	838.3	24	744_TERE	56.5	32	200	-6.9	-5.6	-1.1	8.6	16.7	21.1	22.4	21	15.2	8.1	1	-3.3	-14.1	-13.6	-10.1	-1.1	4.9	9.4	11	10.4	5.7	1.5	-4.2	-9.2	-10.5	-9.6	-5.6	3.8	10.8	15.3	16.7	15.7	10.4	4.8	-1.6	-6.3	31	27	25	42
Pab	20_Nyirj	7	16	1008.3	26	746_WISM	53.8333	11.3333	100	1.2	1.6	5.3	10.4	15.3	19.4	20.9	20.4	18.2	12.5	6.8	3.3	-4	-4	-1.9	2.6	6.4	10.4	12.5	12.3	10	6.2	2.1	-1	-1.4	-1.2	1.7	6.5	10.9	14.9	16.7	16.4	14.1	9.4	4.5	1.1	49	41	34	42
Pab	20_Nyirj	7	16	1007.6	23	749_CUCU	47.3333	25	1410	-4.6	-2.5	2.3	8.9	13.2	16	17.8	17.8	15.1	9.6	2.8	-2.4	-13.6	-10.6	-7.1	-2.3	2.2	5.4	6.9	6.8	3.3	-1.6	-4.5	-9.3	-9.1	-6.6	-2.4	3.3	7.7	10.7	12.3	12.3	9.2	4	-0.8	-5.8	40	42	37	55
Pab	20_Nyirj	7	16	1001.5	23	754_HRAB	48.9833	20.1833	900	-2.4	-0.4	3.7	10.5	15	18.4	20.2	19.9	17.1	11.8	4.3	-0.8	-11.2	-8.8	-5.5	-0.2	4.2	7.5	8.9	8.4	5.4	1	-2.3	-7.4	-6.8	-4.6	-0.9	5.2	9.6	12.9	14.6	14.1	11.3	6.4	1	-4.1	36	37	39	55
Pab	20_Nyirj	7	16	1001.4	25	755_MARG	47.75	25.75	670	-2.6	-0.6	4.6	12.8	17.9	21.1	22.5	22.3	18.9	12.4	5.6	0.2	-10.4	-8	-4.3	1.3	6.3	9.8	11.6	11.2	7.2	2	-1.2	-6.1	-6.5	-4.3	0.2	7.1	12.1	15.5	17.1	16.7	13.1	7.2	2.2	-2.9	33	33	31	49
Pab	20_Nyirj	7	16	909.2	24	756_VERI	58.0833	27.4167	30	-6	-5	-0.3	8	16	20.4	22	20.4	15.4	8.6	1.6	-2.5	-11.8	-11.3	-7.8	0.1	5.8	10.4	12.2	11.4	7.4	3	-2	-7	-8.9	-8.2	-4.1	4	10.9	15.4	17.1	15.9	11.4	5.8	-0.2	-4.8	33	29	28	39
Pab	20_Nyirj	7	16	933	24	758_VORA	47.4	15.8833	1200	-4	-1.3	3.5	9.1	13.6	16.8	18.7	17.9	14.6	9	1.9	-2.6	-11.3	-9.2	-6.3	-1.5	2.6	6	7.3	6.8	3.9	-0.6	-4.3	-8.3	-7.6	-5.2	-1.4	3.8	8.1	11.4	13	12.4	9.3	4.2	-1.2	-5.5	35	44	42	56
Pab	20_Nyirj	7	16	902.6	25	759_VEIT	47.65	15.5833	1000	-2.9	-0.3	4.2	10	14.7	17.9	19.8	19	15.5	9.8	3.1	-1.5	-9.8	-8	-5.1	-0.4	3.7	7.2	8.7	8.1	5.2	0.7	-2.9	-6.8	-6.4	-4.1	-0.5	4.8	9.2	12.5	14.2	13.6	10.4	5.3	0.1	-4.2	70	55	52	59
Pab	20_Nyirj	7	16	962.5	26	764_PRZE	54.1667	21.95	150	-4.5	-3.5	2.5	11.5	17.6	21.1	22.8	22	17.9	11.5	3.9	-0.8	-10	-9.3	-4.3	2.7	7.1	10.4	12.7	12	8.8	4.4	-0.5	-5.5	-7.3	-6.4	-0.9	7.1	12.4	15.8	17.7	17	13.4	8	1.7	-3.2	41	33	31	44
Pab	20_Nyirj	7	16	934.4	26	765_STUE	47.3333	15.6	640	-1.1	1.4	5.9	11.9	16.9	20.3	21.9	21.5	17.8	11.9	5.1	0.6	-7.6	-6.1	-3	1.8	6	9.5	11	10.6	7.5	2.9	-0.5	-4.4	-4.3	-2.4	1.5	6.9	11.5	14.9	16.5	16	12.7	7.4	2.3	-1.9	46	51	52	57
Pab	20_Nyirj	7	16	985.8	26	766_DOBR	49.7833	14.2	420	-0.6	1.7	6.9	13.2	18.1	21.4	23.3	22.6	19	12.7	5.3	1.2	-6.4	-5.1	-2	2.5	6.7	10.2	11.8	11.3	8.3	3.6	-0.3	-3.9	-3.5	-1.7	2.5	7.9	12.4	15.8	17.5	17	13.6	8.2	2.5	-1.3	29	28	31	38
Pab	20_Nyirj	7	16	558.4	16	768_VALL	62.3333	14.1333	450	-6.2	-4.9	0.3	5.6	11.9	17	18.6	17.1	12.2	6.2	0.3	-3	-13.5	-12.9	-8.9	-3.3	1.7	6.9	9	8.3	4.9	0.5	-4.7	-9	-9.9	-8.9	-4.3	1.2	6.8	11.9	13.8	12.7	8.5	3.4	-2.2	-6	41	30	31	39
Pab	20_Nyirj	7	16	965.4	23	770_VAL_	46.2833	11.4667	1100	-0.1	2.7	7.2	12.5	16.2	20.3	22.6	21.4	19.3	12.4	5.9	1.5	-8.1	-6	-2.4	2	5.2	8.8	10.3	10.1	8.2	2.8	-1	-5.5	-4.1	-1.6	2.4	7.2	10.7	14.6	16.5	15.7	13.7	7.6	2.4	-2	47	37	43	57
Pab	20_Nyirj	7	16	991.5	25	773_JASI	48.25	24.3333	700	-2.5	-0.6	4.3	12.2	17.2	20.5	22.2	21.9	18.4	12.4	5.4	0.3	-9.5	-7	-3.4	2	6.3	9.6	11.1	10.9	7.1	2.3	-0.9	-5.1	-6	-3.8	0.4	7.1	11.8	15.1	16.7	16.4	12.8	7.3	2.2	-2.4	46	51	43	60
Pab	20_Nyirj	7	16	702.9	24	778_BORO	42.25	23.5833	1300	-0.5	0.9	4	9.5	14.5	18.2	20.8	21.1	17.7	12.3	7.1	2.3	-7.3	-6	-4.2	-0.1	4.4	7.8	9.5	10	7	2.9	0	-4	-3.9	-2.5	-0.1	4.7	9.4	13	15.1	15.5	12.4	7.6	3.5	-0.8	69	51	54	60
Pab	20_Nyirj	7	16	817.1	24	779_URJA	61.1	23.5	100	-5.4	-4.7	-0.3	6.7	14.4	19.7	21.3	19.2	13.7	7.5	1.7	-2	-11.9	-12.1	-9.1	-1.7	3.2	8.6	10.8	9.9	6.3	2.1	-2.6	-7.3	-8.7	-8.4	-4.7	2.5	8.8	14.2	16	14.5	10	4.8	-0.4	-4.7	37	28	23	32
Pab	20_Nyirj	7	16	823.2	25	790_MALI	47.5	9.83333	600	0.5	3.2	8.1	13.3	17.3	20.9	22.3	21.3	18.8	12.9	6.6	1.8	-6.1	-4.7	-1.3	3.1	6.4	10	11.7	10.9	8.6	4.3	-0.1	-4.2	-2.8	-0.8	3.4	8.2	11.8	15.4	17	16.1	13.7	8.6	3.3	-1.2	117	105	102	124
Pab	20_Nyirj	7	16	951.3	24	796_BUEK	48.0667	20.6333	615	-2.1	1.3	6.5	13.7	18.4	21.6	23.7	23.1	19.9	13.7	6.1	0.6	-8.9	-6	-3.1	2.2	6.7	10.3	11.6	11.1	7.8	2.6	-0.2	-5	-5.5	-2.3	1.7	8	12.6	15.9	17.7	17.1	13.9	8.2	2.9	-2.2	40	41	35	52
Pab	20_Nyirj	7	16	947.4	25	798_GURK	46.8667	14.2833	1300	-4.7	-1.4	3.5	8.6	13.3	16.9	18.7	18	14.7	8.6	1.5	-3.4	-12.5	-10.3	-6.6	-1.9	2.1	5.8	7	6.3	3.8	-1	-4.8	-9.5	-8.6	-5.9	-1.5	3.4	7.7	11.4	12.9	12.1	9.2	3.8	-1.6	-6.4	33	36	39	62
Pab	6_Abild	7	16	809.4	24	700_COSN	47.3333	25.1667	1025	-3	-1.1	4.1	11.2	15.9	18.8	20.6	20.5	17.4	11.7	4.8	-0.6	-11.6	-8.9	-5.2	-0.1	4.5	7.9	9.5	9.2	5.4	0.4	-2.4	-7.2	-7.3	-5	-0.5	5.6	10.2	13.3	15.1	14.9	11.4	6	1.2	-3.9	37	39	36	53
Pab	6_Abild	7	16	674.5	23	702_NOVE	48.8333	14.8	500	-0.2	1.8	7.1	13.2	18	21.1	23	22.4	18.8	12.5	5.6	1.5	-6.8	-5.7	-2.5	2.3	6.2	9.7	11.4	10.9	7.8	3.1	-0.4	-3.8	-3.5	-2	2.3	7.8	12.1	15.4	17.2	16.6	13.3	7.8	2.6	-1.2	41	46	44	53
Pab	6_Abild	7	16	646.1	25	708_TAVE	46.3	7.11667	1600	-1.8	-0.8	2.9	7.1	11.1	15	17.2	16	13.9	8.8	3.1	-0.4	-8.7	-7.9	-5	-1.6	1.9	5.5	7.4	7	5.4	1.2	-3.1	-6.6	-5.3	-4.4	-1.1	2.8	6.5	10.2	12.3	11.5	9.6	5	0	-3.5	138	129	118	115
Pab	6_Abild	7	16	695.8	24	711_ZWIN	49.7333	8.61667	500	0.6	2.6	8.2	13.5	17.5	20.8	22.3	21.1	18.6	12.5	5.8	1.6	-5.2	-4	-1.7	2.9	6.1	9.6	11.1	10.6	8	3.6	0.2	-3.4	-2.3	-0.7	3.2	8.2	11.8	15.2	16.7	15.8	13.3	8.1	3	-0.9	52	45	36	41
Pab	6_Abild	7	16	745.5	22	713_LIPT	48.9333	19.85	1125	-3.2	-1.9	1.7	8.1	12.6	16.1	18	17.7	15	9.9	3.1	-1.3	-10.9	-9.2	-6.5	-1.2	3.3	6.7	8.2	8	5	0.9	-2.6	-7.2	-7.1	-5.5	-2.4	3.5	7.9	11.4	13.1	12.9	10	5.4	0.3	-4.2	65	66	65	83
Pab	6_Abild	7	16	773.9	19	714_MORA	49.75	16.6667	570	-1.9	0.7	5.3	12	16.3	19.5	21.3	20.7	17.7	11.9	4.9	-0.2	-8	-6	-3.1	1.5	5.5	8.8	9.9	9.7	7.3	3.3	-0.4	-5	-5	-2.6	1.1	6.7	10.9	14.2	15.6	15.2	12.5	7.6	2.2	-2.6	25	30	29	39
Pab	6_Abild	7	16	702.9	25	717_CRES	46.5167	8.63333	1120	0.7	1.6	5.1	9.3	13.4	16.9	19.1	18.1	16	11.3	5.7	2.6	-5.5	-4.8	-2.2	1.1	4.6	8.3	10.4	9.7	8	3.9	-0.3	-3.6	-2.4	-1.6	1.4	5.2	9	12.6	14.8	13.9	12	7.6	2.7	-0.5	83	81	96	141
Pab	6_Abild	7	16	731.3	21	721_BURG	48.1667	12.8167	500	0.5	2.8	8.4	13.9	17.7	21.2	22.9	22.2	19.6	13.4	6.5	1.7	-7	-5.6	-1.9	2.9	6.5	9.9	11.6	11.2	8.7	3.7	-0.2	-4.5	-3.3	-1.4	3.3	8.4	12.1	15.6	17.2	16.7	14.1	8.5	3.1	-1.4	60	51	55	70
Pab	6_Abild	7	16	695.8	24	723_BADE	48.7667	8.23333	500	1.3	3.8	8.7	13.7	17.6	21	23.2	22.1	19.6	13.6	6.7	2.6	-4.6	-3.2	-1	3.1	6.5	9.8	11.6	11.1	8.7	4.3	0.3	-3	-1.7	0.3	3.9	8.4	12.1	15.4	17.4	16.6	14.2	9	3.5	-0.2	80	61	56	64
Pab	6_Abild	7	16	724.2	24	730_KLAS	48.9667	18.8667	700	-2.5	0.6	5.6	12.4	16.7	20	21.9	21.5	18.4	12.5	4.7	-0.8	-10.6	-7.8	-4.2	0.8	4.8	8.1	9.2	8.8	6.2	2	-1.4	-6.6	-6.5	-3.6	0.7	6.6	10.7	14	15.6	15.1	12.3	7.3	1.6	-3.7	45	52	46	58
Pab	6_Abild	7	16	674.5	23	733_OEST	60.5	11	275	-5.2	-4.2	1.3	7.1	13.9	18.5	20.2	18.5	13.6	7.5	1	-2.7	-11	-11.1	-6.8	-1.6	3.5	8.3	10.3	9.3	5.7	1.5	-3.7	-7.9	-8.1	-7.6	-2.7	2.8	8.7	13.4	15.2	13.9	9.6	4.5	-1.3	-5.3	44	38	25	40
Pab	6_Abild	7	16	717.1	25	734_BOGS	59.9667	10.65	160	-3.3	-2.5	2.6	8.4	14.9	19.5	21	19.6	14.7	8.8	2.5	-0.9	-8.7	-8.9	-5	-0.2	5	9.8	11.6	11	7.4	3.1	-1.9	-5.6	-6	-5.7	-1.2	4.1	10	14.6	16.3	15.3	11	6	0.3	-3.2	49	40	27	44
Pab	6_Abild	7	16	688.7	22	735_KNIT	47.2	14.8167	1300	-4.8	-1.6	3.4	8.7	13.2	16.8	18.5	17.7	14.3	8.4	1.3	-3.9	-12.7	-10.7	-7.1	-2.1	2	5.6	6.8	6.1	3.3	-1.5	-5.4	-10	-8.8	-6.1	-1.8	3.3	7.6	11.2	12.7	11.9	8.8	3.4	-2	-7	32	32	36	48
Pab	6_Abild	7	16	766.8	23	743_WITE	55.0833	30.1667	150	-6	-4.1	0.4	9.9	18	21.4	22.7	21.6	16.3	9.3	2.2	-2.6	-12.9	-11.5	-7.4	0.7	6.7	10.6	12.1	11.3	6.8	2.4	-2.6	-8	-9.4	-7.8	-3.5	5.3	12.4	16	17.4	16.4	11.5	5.8	-0.2	-5.3	36	30	33	41
Pab	6_Abild	7	16	724.2	24	744_TERE	56.5	32	200	-6.9	-5.6	-1.1	8.6	16.7	21.1	22.4	21	15.2	8.1	1	-3.3	-14.1	-13.6	-10.1	-1.1	4.9	9.4	11	10.4	5.7	1.5	-4.2	-9.2	-10.5	-9.6	-5.6	3.8	10.8	15.3	16.7	15.7	10.4	4.8	-1.6	-6.3	31	27	25	42
Pab	6_Abild	7	16	731.3	25	746_WISM	53.8333	11.3333	100	1.2	1.6	5.3	10.4	15.3	19.4	20.9	20.4	18.2	12.5	6.8	3.3	-4	-4	-1.9	2.6	6.4	10.4	12.5	12.3	10	6.2	2.1	-1	-1.4	-1.2	1.7	6.5	10.9	14.9	16.7	16.4	14.1	9.4	4.5	1.1	49	41	34	42
Pab	6_Abild	7	16	830.7	25	749_CUCU	47.3333	25	1410	-4.6	-2.5	2.3	8.9	13.2	16	17.8	17.8	15.1	9.6	2.8	-2.4	-13.6	-10.6	-7.1	-2.3	2.2	5.4	6.9	6.8	3.3	-1.6	-4.5	-9.3	-9.1	-6.6	-2.4	3.3	7.7	10.7	12.3	12.3	9.2	4	-0.8	-5.8	40	42	37	55
Pab	6_Abild	7	16	837.8	24	754_HRAB	48.9833	20.1833	900	-2.4	-0.4	3.7	10.5	15	18.4	20.2	19.9	17.1	11.8	4.3	-0.8	-11.2	-8.8	-5.5	-0.2	4.2	7.5	8.9	8.4	5.4	1	-2.3	-7.4	-6.8	-4.6	-0.9	5.2	9.6	12.9	14.6	14.1	11.3	6.4	1	-4.1	36	37	39	55
Pab	6_Abild	7	16	759.7	24	755_MARG	47.75	25.75	670	-2.6	-0.6	4.6	12.8	17.9	21.1	22.5	22.3	18.9	12.4	5.6	0.2	-10.4	-8	-4.3	1.3	6.3	9.8	11.6	11.2	7.2	2	-1.2	-6.1	-6.5	-4.3	0.2	7.1	12.1	15.5	17.1	16.7	13.1	7.2	2.2	-2.9	33	33	31	49
Pab	6_Abild	7	16	781	24	756_VERI	58.0833	27.4167	30	-6	-5	-0.3	8	16	20.4	22	20.4	15.4	8.6	1.6	-2.5	-11.8	-11.3	-7.8	0.1	5.8	10.4	12.2	11.4	7.4	3	-2	-7	-8.9	-8.2	-4.1	4	10.9	15.4	17.1	15.9	11.4	5.8	-0.2	-4.8	33	29	28	39
Pab	6_Abild	7	16	731.3	24	758_VORA	47.4	15.8833	1200	-4	-1.3	3.5	9.1	13.6	16.8	18.7	17.9	14.6	9	1.9	-2.6	-11.3	-9.2	-6.3	-1.5	2.6	6	7.3	6.8	3.9	-0.6	-4.3	-8.3	-7.6	-5.2	-1.4	3.8	8.1	11.4	13	12.4	9.3	4.2	-1.2	-5.5	35	44	42	56
Pab	6_Abild	7	16	695.8	23	759_VEIT	47.65	15.5833	1000	-2.9	-0.3	4.2	10	14.7	17.9	19.8	19	15.5	9.8	3.1	-1.5	-9.8	-8	-5.1	-0.4	3.7	7.2	8.7	8.1	5.2	0.7	-2.9	-6.8	-6.4	-4.1	-0.5	4.8	9.2	12.5	14.2	13.6	10.4	5.3	0.1	-4.2	70	55	52	59
Pab	6_Abild	7	16	781	24	764_PRZE	54.1667	21.95	150	-4.5	-3.5	2.5	11.5	17.6	21.1	22.8	22	17.9	11.5	3.9	-0.8	-10	-9.3	-4.3	2.7	7.1	10.4	12.7	12	8.8	4.4	-0.5	-5.5	-7.3	-6.4	-0.9	7.1	12.4	15.8	17.7	17	13.4	8	1.7	-3.2	41	33	31	44
Pab	6_Abild	7	16	724.2	21	765_STUE	47.3333	15.6	640	-1.1	1.4	5.9	11.9	16.9	20.3	21.9	21.5	17.8	11.9	5.1	0.6	-7.6	-6.1	-3	1.8	6	9.5	11	10.6	7.5	2.9	-0.5	-4.4	-4.3	-2.4	1.5	6.9	11.5	14.9	16.5	16	12.7	7.4	2.3	-1.9	46	51	52	57
Pab	6_Abild	7	16	731.3	25	766_DOBR	49.7833	14.2	420	-0.6	1.7	6.9	13.2	18.1	21.4	23.3	22.6	19	12.7	5.3	1.2	-6.4	-5.1	-2	2.5	6.7	10.2	11.8	11.3	8.3	3.6	-0.3	-3.9	-3.5	-1.7	2.5	7.9	12.4	15.8	17.5	17	13.6	8.2	2.5	-1.3	29	28	31	38
Pab	6_Abild	7	16	560.9	24	768_VALL	62.3333	14.1333	450	-6.2	-4.9	0.3	5.6	11.9	17	18.6	17.1	12.2	6.2	0.3	-3	-13.5	-12.9	-8.9	-3.3	1.7	6.9	9	8.3	4.9	0.5	-4.7	-9	-9.9	-8.9	-4.3	1.2	6.8	11.9	13.8	12.7	8.5	3.4	-2.2	-6	41	30	31	39
Pab	6_Abild	7	16	617.7	23	770_VAL_	46.2833	11.4667	1100	-0.1	2.7	7.2	12.5	16.2	20.3	22.6	21.4	19.3	12.4	5.9	1.5	-8.1	-6	-2.4	2	5.2	8.8	10.3	10.1	8.2	2.8	-1	-5.5	-4.1	-1.6	2.4	7.2	10.7	14.6	16.5	15.7	13.7	7.6	2.4	-2	47	37	43	57
Pab	6_Abild	7	16	766.8	23	773_JASI	48.25	24.3333	700	-2.5	-0.6	4.3	12.2	17.2	20.5	22.2	21.9	18.4	12.4	5.4	0.3	-9.5	-7	-3.4	2	6.3	9.6	11.1	10.9	7.1	2.3	-0.9	-5.1	-6	-3.8	0.4	7.1	11.8	15.1	16.7	16.4	12.8	7.3	2.2	-2.4	46	51	43	60
Pab	6_Abild	7	16	560.9	25	778_BORO	42.25	23.5833	1300	-0.5	0.9	4	9.5	14.5	18.2	20.8	21.1	17.7	12.3	7.1	2.3	-7.3	-6	-4.2	-0.1	4.4	7.8	9.5	10	7	2.9	0	-4	-3.9	-2.5	-0.1	4.7	9.4	13	15.1	15.5	12.4	7.6	3.5	-0.8	69	51	54	60
Pab	6_Abild	7	16	695.8	24	779_URJA	61.1	23.5	100	-5.4	-4.7	-0.3	6.7	14.4	19.7	21.3	19.2	13.7	7.5	1.7	-2	-11.9	-12.1	-9.1	-1.7	3.2	8.6	10.8	9.9	6.3	2.1	-2.6	-7.3	-8.7	-8.4	-4.7	2.5	8.8	14.2	16	14.5	10	4.8	-0.4	-4.7	37	28	23	32
Pab	6_Abild	7	16	631.9	24	790_MALI	47.5	9.83333	600	0.5	3.2	8.1	13.3	17.3	20.9	22.3	21.3	18.8	12.9	6.6	1.8	-6.1	-4.7	-1.3	3.1	6.4	10	11.7	10.9	8.6	4.3	-0.1	-4.2	-2.8	-0.8	3.4	8.2	11.8	15.4	17	16.1	13.7	8.6	3.3	-1.2	117	105	102	124
Pab	6_Abild	7	16	788.1	21	796_BUEK	48.0667	20.6333	615	-2.1	1.3	6.5	13.7	18.4	21.6	23.7	23.1	19.9	13.7	6.1	0.6	-8.9	-6	-3.1	2.2	6.7	10.3	11.6	11.1	7.8	2.6	-0.2	-5	-5.5	-2.3	1.7	8	12.6	15.9	17.7	17.1	13.9	8.2	2.9	-2.2	40	41	35	52
Pab	6_Abild	7	16	695.8	23	798_GURK	46.8667	14.2833	1300	-4.7	-1.4	3.5	8.6	13.3	16.9	18.7	18	14.7	8.6	1.5	-3.4	-12.5	-10.3	-6.6	-1.9	2.1	5.8	7	6.3	3.8	-1	-4.8	-9.5	-8.6	-5.9	-1.5	3.4	7.7	11.4	12.9	12.1	9.2	3.8	-1.6	-6.4	33	36	39	62
Pab	7_Lisjo	7	18	508.5	12	700_COSN	47.3333	25.1667	1025	-3	-1.1	4.1	11.2	15.9	18.8	20.6	20.5	17.4	11.7	4.8	-0.6	-11.6	-8.9	-5.2	-0.1	4.5	7.9	9.5	9.2	5.4	0.4	-2.4	-7.2	-7.3	-5	-0.5	5.6	10.2	13.3	15.1	14.9	11.4	6	1.2	-3.9	37	39	36	53
Pab	7_Lisjo	7	18	504	12	702_NOVE	48.8333	14.8	500	-0.2	1.8	7.1	13.2	18	21.1	23	22.4	18.8	12.5	5.6	1.5	-6.8	-5.7	-2.5	2.3	6.2	9.7	11.4	10.9	7.8	3.1	-0.4	-3.8	-3.5	-2	2.3	7.8	12.1	15.4	17.2	16.6	13.3	7.8	2.6	-1.2	41	46	44	53
Pab	7_Lisjo	7	18	391.5	12	708_TAVE	46.3	7.11667	1600	-1.8	-0.8	2.9	7.1	11.1	15	17.2	16	13.9	8.8	3.1	-0.4	-8.7	-7.9	-5	-1.6	1.9	5.5	7.4	7	5.4	1.2	-3.1	-6.6	-5.3	-4.4	-1.1	2.8	6.5	10.2	12.3	11.5	9.6	5	0	-3.5	138	129	118	115
Pab	7_Lisjo	7	18	459	11	711_ZWIN	49.7333	8.61667	500	0.6	2.6	8.2	13.5	17.5	20.8	22.3	21.1	18.6	12.5	5.8	1.6	-5.2	-4	-1.7	2.9	6.1	9.6	11.1	10.6	8	3.6	0.2	-3.4	-2.3	-0.7	3.2	8.2	11.8	15.2	16.7	15.8	13.3	8.1	3	-0.9	52	45	36	41
Pab	7_Lisjo	7	18	472.5	6	713_LIPT	48.9333	19.85	1125	-3.2	-1.9	1.7	8.1	12.6	16.1	18	17.7	15	9.9	3.1	-1.3	-10.9	-9.2	-6.5	-1.2	3.3	6.7	8.2	8	5	0.9	-2.6	-7.2	-7.1	-5.5	-2.4	3.5	7.9	11.4	13.1	12.9	10	5.4	0.3	-4.2	65	66	65	83
Pab	7_Lisjo	7	18	405	10	714_MORA	49.75	16.6667	570	-1.9	0.7	5.3	12	16.3	19.5	21.3	20.7	17.7	11.9	4.9	-0.2	-8	-6	-3.1	1.5	5.5	8.8	9.9	9.7	7.3	3.3	-0.4	-5	-5	-2.6	1.1	6.7	10.9	14.2	15.6	15.2	12.5	7.6	2.2	-2.6	25	30	29	39
Pab	7_Lisjo	7	18	463.5	10	717_CRES	46.5167	8.63333	1120	0.7	1.6	5.1	9.3	13.4	16.9	19.1	18.1	16	11.3	5.7	2.6	-5.5	-4.8	-2.2	1.1	4.6	8.3	10.4	9.7	8	3.9	-0.3	-3.6	-2.4	-1.6	1.4	5.2	9	12.6	14.8	13.9	12	7.6	2.7	-0.5	83	81	96	141
Pab	7_Lisjo	7	18	423	15	721_BURG	48.1667	12.8167	500	0.5	2.8	8.4	13.9	17.7	21.2	22.9	22.2	19.6	13.4	6.5	1.7	-7	-5.6	-1.9	2.9	6.5	9.9	11.6	11.2	8.7	3.7	-0.2	-4.5	-3.3	-1.4	3.3	8.4	12.1	15.6	17.2	16.7	14.1	8.5	3.1	-1.4	60	51	55	70
Pab	7_Lisjo	7	18	355.5	12	723_BADE	48.7667	8.23333	500	1.3	3.8	8.7	13.7	17.6	21	23.2	22.1	19.6	13.6	6.7	2.6	-4.6	-3.2	-1	3.1	6.5	9.8	11.6	11.1	8.7	4.3	0.3	-3	-1.7	0.3	3.9	8.4	12.1	15.4	17.4	16.6	14.2	9	3.5	-0.2	80	61	56	64
Pab	7_Lisjo	7	18	391.5	15	730_KLAS	48.9667	18.8667	700	-2.5	0.6	5.6	12.4	16.7	20	21.9	21.5	18.4	12.5	4.7	-0.8	-10.6	-7.8	-4.2	0.8	4.8	8.1	9.2	8.8	6.2	2	-1.4	-6.6	-6.5	-3.6	0.7	6.6	10.7	14	15.6	15.1	12.3	7.3	1.6	-3.7	45	52	46	58
Pab	7_Lisjo	7	18	423	14	733_OEST	60.5	11	275	-5.2	-4.2	1.3	7.1	13.9	18.5	20.2	18.5	13.6	7.5	1	-2.7	-11	-11.1	-6.8	-1.6	3.5	8.3	10.3	9.3	5.7	1.5	-3.7	-7.9	-8.1	-7.6	-2.7	2.8	8.7	13.4	15.2	13.9	9.6	4.5	-1.3	-5.3	44	38	25	40
Pab	7_Lisjo	7	18	522	16	734_BOGS	59.9667	10.65	160	-3.3	-2.5	2.6	8.4	14.9	19.5	21	19.6	14.7	8.8	2.5	-0.9	-8.7	-8.9	-5	-0.2	5	9.8	11.6	11	7.4	3.1	-1.9	-5.6	-6	-5.7	-1.2	4.1	10	14.6	16.3	15.3	11	6	0.3	-3.2	49	40	27	44
Pab	7_Lisjo	7	18	454.5	10	735_KNIT	47.2	14.8167	1300	-4.8	-1.6	3.4	8.7	13.2	16.8	18.5	17.7	14.3	8.4	1.3	-3.9	-12.7	-10.7	-7.1	-2.1	2	5.6	6.8	6.1	3.3	-1.5	-5.4	-10	-8.8	-6.1	-1.8	3.3	7.6	11.2	12.7	11.9	8.8	3.4	-2	-7	32	32	36	48
Pab	7_Lisjo	7	18	553.5	16	743_WITE	55.0833	30.1667	150	-6	-4.1	0.4	9.9	18	21.4	22.7	21.6	16.3	9.3	2.2	-2.6	-12.9	-11.5	-7.4	0.7	6.7	10.6	12.1	11.3	6.8	2.4	-2.6	-8	-9.4	-7.8	-3.5	5.3	12.4	16	17.4	16.4	11.5	5.8	-0.2	-5.3	36	30	33	41
Pab	7_Lisjo	7	18	522	20	744_TERE	56.5	32	200	-6.9	-5.6	-1.1	8.6	16.7	21.1	22.4	21	15.2	8.1	1	-3.3	-14.1	-13.6	-10.1	-1.1	4.9	9.4	11	10.4	5.7	1.5	-4.2	-9.2	-10.5	-9.6	-5.6	3.8	10.8	15.3	16.7	15.7	10.4	4.8	-1.6	-6.3	31	27	25	42
Pab	7_Lisjo	7	18	391.5	12	746_WISM	53.8333	11.3333	100	1.2	1.6	5.3	10.4	15.3	19.4	20.9	20.4	18.2	12.5	6.8	3.3	-4	-4	-1.9	2.6	6.4	10.4	12.5	12.3	10	6.2	2.1	-1	-1.4	-1.2	1.7	6.5	10.9	14.9	16.7	16.4	14.1	9.4	4.5	1.1	49	41	34	42
Pab	7_Lisjo	7	18	535.5	14	749_CUCU	47.3333	25	1410	-4.6	-2.5	2.3	8.9	13.2	16	17.8	17.8	15.1	9.6	2.8	-2.4	-13.6	-10.6	-7.1	-2.3	2.2	5.4	6.9	6.8	3.3	-1.6	-4.5	-9.3	-9.1	-6.6	-2.4	3.3	7.7	10.7	12.3	12.3	9.2	4	-0.8	-5.8	40	42	37	55
Pab	7_Lisjo	7	18	544.5	14	754_HRAB	48.9833	20.1833	900	-2.4	-0.4	3.7	10.5	15	18.4	20.2	19.9	17.1	11.8	4.3	-0.8	-11.2	-8.8	-5.5	-0.2	4.2	7.5	8.9	8.4	5.4	1	-2.3	-7.4	-6.8	-4.6	-0.9	5.2	9.6	12.9	14.6	14.1	11.3	6.4	1	-4.1	36	37	39	55
Pab	7_Lisjo	7	18	499.5	14	755_MARG	47.75	25.75	670	-2.6	-0.6	4.6	12.8	17.9	21.1	22.5	22.3	18.9	12.4	5.6	0.2	-10.4	-8	-4.3	1.3	6.3	9.8	11.6	11.2	7.2	2	-1.2	-6.1	-6.5	-4.3	0.2	7.1	12.1	15.5	17.1	16.7	13.1	7.2	2.2	-2.9	33	33	31	49
Pab	7_Lisjo	7	18	549	18	756_VERI	58.0833	27.4167	30	-6	-5	-0.3	8	16	20.4	22	20.4	15.4	8.6	1.6	-2.5	-11.8	-11.3	-7.8	0.1	5.8	10.4	12.2	11.4	7.4	3	-2	-7	-8.9	-8.2	-4.1	4	10.9	15.4	17.1	15.9	11.4	5.8	-0.2	-4.8	33	29	28	39
Pab	7_Lisjo	7	18	409.5	13	758_VORA	47.4	15.8833	1200	-4	-1.3	3.5	9.1	13.6	16.8	18.7	17.9	14.6	9	1.9	-2.6	-11.3	-9.2	-6.3	-1.5	2.6	6	7.3	6.8	3.9	-0.6	-4.3	-8.3	-7.6	-5.2	-1.4	3.8	8.1	11.4	13	12.4	9.3	4.2	-1.2	-5.5	35	44	42	56
Pab	7_Lisjo	7	18	409.5	14	759_VEIT	47.65	15.5833	1000	-2.9	-0.3	4.2	10	14.7	17.9	19.8	19	15.5	9.8	3.1	-1.5	-9.8	-8	-5.1	-0.4	3.7	7.2	8.7	8.1	5.2	0.7	-2.9	-6.8	-6.4	-4.1	-0.5	4.8	9.2	12.5	14.2	13.6	10.4	5.3	0.1	-4.2	70	55	52	59
Pab	7_Lisjo	7	18	643.5	19	764_PRZE	54.1667	21.95	150	-4.5	-3.5	2.5	11.5	17.6	21.1	22.8	22	17.9	11.5	3.9	-0.8	-10	-9.3	-4.3	2.7	7.1	10.4	12.7	12	8.8	4.4	-0.5	-5.5	-7.3	-6.4	-0.9	7.1	12.4	15.8	17.7	17	13.4	8	1.7	-3.2	41	33	31	44
Pab	7_Lisjo	7	18	477	9	765_STUE	47.3333	15.6	640	-1.1	1.4	5.9	11.9	16.9	20.3	21.9	21.5	17.8	11.9	5.1	0.6	-7.6	-6.1	-3	1.8	6	9.5	11	10.6	7.5	2.9	-0.5	-4.4	-4.3	-2.4	1.5	6.9	11.5	14.9	16.5	16	12.7	7.4	2.3	-1.9	46	51	52	57
Pab	7_Lisjo	7	18	481.5	15	766_DOBR	49.7833	14.2	420	-0.6	1.7	6.9	13.2	18.1	21.4	23.3	22.6	19	12.7	5.3	1.2	-6.4	-5.1	-2	2.5	6.7	10.2	11.8	11.3	8.3	3.6	-0.3	-3.9	-3.5	-1.7	2.5	7.9	12.4	15.8	17.5	17	13.6	8.2	2.5	-1.3	29	28	31	38
Pab	7_Lisjo	7	18	324	10	768_VALL	62.3333	14.1333	450	-6.2	-4.9	0.3	5.6	11.9	17	18.6	17.1	12.2	6.2	0.3	-3	-13.5	-12.9	-8.9	-3.3	1.7	6.9	9	8.3	4.9	0.5	-4.7	-9	-9.9	-8.9	-4.3	1.2	6.8	11.9	13.8	12.7	8.5	3.4	-2.2	-6	41	30	31	39
Pab	7_Lisjo	7	18	391.5	9	770_VAL_	46.2833	11.4667	1100	-0.1	2.7	7.2	12.5	16.2	20.3	22.6	21.4	19.3	12.4	5.9	1.5	-8.1	-6	-2.4	2	5.2	8.8	10.3	10.1	8.2	2.8	-1	-5.5	-4.1	-1.6	2.4	7.2	10.7	14.6	16.5	15.7	13.7	7.6	2.4	-2	47	37	43	57
Pab	7_Lisjo	7	18	562.5	18	773_JASI	48.25	24.3333	700	-2.5	-0.6	4.3	12.2	17.2	20.5	22.2	21.9	18.4	12.4	5.4	0.3	-9.5	-7	-3.4	2	6.3	9.6	11.1	10.9	7.1	2.3	-0.9	-5.1	-6	-3.8	0.4	7.1	11.8	15.1	16.7	16.4	12.8	7.3	2.2	-2.4	46	51	43	60
Pab	7_Lisjo	7	18	342	5	778_BORO	42.25	23.5833	1300	-0.5	0.9	4	9.5	14.5	18.2	20.8	21.1	17.7	12.3	7.1	2.3	-7.3	-6	-4.2	-0.1	4.4	7.8	9.5	10	7	2.9	0	-4	-3.9	-2.5	-0.1	4.7	9.4	13	15.1	15.5	12.4	7.6	3.5	-0.8	69	51	54	60
Pab	7_Lisjo	7	18	427.5	12	779_URJA	61.1	23.5	100	-5.4	-4.7	-0.3	6.7	14.4	19.7	21.3	19.2	13.7	7.5	1.7	-2	-11.9	-12.1	-9.1	-1.7	3.2	8.6	10.8	9.9	6.3	2.1	-2.6	-7.3	-8.7	-8.4	-4.7	2.5	8.8	14.2	16	14.5	10	4.8	-0.4	-4.7	37	28	23	32
Pab	7_Lisjo	7	18	319.5	10	790_MALI	47.5	9.83333	600	0.5	3.2	8.1	13.3	17.3	20.9	22.3	21.3	18.8	12.9	6.6	1.8	-6.1	-4.7	-1.3	3.1	6.4	10	11.7	10.9	8.6	4.3	-0.1	-4.2	-2.8	-0.8	3.4	8.2	11.8	15.4	17	16.1	13.7	8.6	3.3	-1.2	117	105	102	124
Pab	7_Lisjo	7	18	495	11	796_BUEK	48.0667	20.6333	615	-2.1	1.3	6.5	13.7	18.4	21.6	23.7	23.1	19.9	13.7	6.1	0.6	-8.9	-6	-3.1	2.2	6.7	10.3	11.6	11.1	7.8	2.6	-0.2	-5	-5.5	-2.3	1.7	8	12.6	15.9	17.7	17.1	13.9	8.2	2.9	-2.2	40	41	35	52
Pab	7_Lisjo	7	18	346.5	9	798_GURK	46.8667	14.2833	1300	-4.7	-1.4	3.5	8.6	13.3	16.9	18.7	18	14.7	8.6	1.5	-3.4	-12.5	-10.3	-6.6	-1.9	2.1	5.8	7	6.3	3.8	-1	-4.8	-9.5	-8.6	-5.9	-1.5	3.4	7.7	11.4	12.9	12.1	9.2	3.8	-1.6	-6.4	33	36	39	62
Pab	8_Lappko	7	19	351	12	700_COSN	47.3333	25.1667	1025	-3	-1.1	4.1	11.2	15.9	18.8	20.6	20.5	17.4	11.7	4.8	-0.6	-11.6	-8.9	-5.2	-0.1	4.5	7.9	9.5	9.2	5.4	0.4	-2.4	-7.2	-7.3	-5	-0.5	5.6	10.2	13.3	15.1	14.9	11.4	6	1.2	-3.9	37	39	36	53
Pab	8_Lappko	7	19	243	7	702_NOVE	48.8333	14.8	500	-0.2	1.8	7.1	13.2	18	21.1	23	22.4	18.8	12.5	5.6	1.5	-6.8	-5.7	-2.5	2.3	6.2	9.7	11.4	10.9	7.8	3.1	-0.4	-3.8	-3.5	-2	2.3	7.8	12.1	15.4	17.2	16.6	13.3	7.8	2.6	-1.2	41	46	44	53
Pab	8_Lappko	7	19	231	8	708_TAVE	46.3	7.11667	1600	-1.8	-0.8	2.9	7.1	11.1	15	17.2	16	13.9	8.8	3.1	-0.4	-8.7	-7.9	-5	-1.6	1.9	5.5	7.4	7	5.4	1.2	-3.1	-6.6	-5.3	-4.4	-1.1	2.8	6.5	10.2	12.3	11.5	9.6	5	0	-3.5	138	129	118	115
Pab	8_Lappko	7	19	249	5	711_ZWIN	49.7333	8.61667	500	0.6	2.6	8.2	13.5	17.5	20.8	22.3	21.1	18.6	12.5	5.8	1.6	-5.2	-4	-1.7	2.9	6.1	9.6	11.1	10.6	8	3.6	0.2	-3.4	-2.3	-0.7	3.2	8.2	11.8	15.2	16.7	15.8	13.3	8.1	3	-0.9	52	45	36	41
Pab	8_Lappko	7	19	333	13	713_LIPT	48.9333	19.85	1125	-3.2	-1.9	1.7	8.1	12.6	16.1	18	17.7	15	9.9	3.1	-1.3	-10.9	-9.2	-6.5	-1.2	3.3	6.7	8.2	8	5	0.9	-2.6	-7.2	-7.1	-5.5	-2.4	3.5	7.9	11.4	13.1	12.9	10	5.4	0.3	-4.2	65	66	65	83
Pab	8_Lappko	7	19	345	10	714_MORA	49.75	16.6667	570	-1.9	0.7	5.3	12	16.3	19.5	21.3	20.7	17.7	11.9	4.9	-0.2	-8	-6	-3.1	1.5	5.5	8.8	9.9	9.7	7.3	3.3	-0.4	-5	-5	-2.6	1.1	6.7	10.9	14.2	15.6	15.2	12.5	7.6	2.2	-2.6	25	30	29	39
Pab	8_Lappko	7	19	339	9	717_CRES	46.5167	8.63333	1120	0.7	1.6	5.1	9.3	13.4	16.9	19.1	18.1	16	11.3	5.7	2.6	-5.5	-4.8	-2.2	1.1	4.6	8.3	10.4	9.7	8	3.9	-0.3	-3.6	-2.4	-1.6	1.4	5.2	9	12.6	14.8	13.9	12	7.6	2.7	-0.5	83	81	96	141
Pab	8_Lappko	7	19	258	8	721_BURG	48.1667	12.8167	500	0.5	2.8	8.4	13.9	17.7	21.2	22.9	22.2	19.6	13.4	6.5	1.7	-7	-5.6	-1.9	2.9	6.5	9.9	11.6	11.2	8.7	3.7	-0.2	-4.5	-3.3	-1.4	3.3	8.4	12.1	15.6	17.2	16.7	14.1	8.5	3.1	-1.4	60	51	55	70
Pab	8_Lappko	7	19	162	4	723_BADE	48.7667	8.23333	500	1.3	3.8	8.7	13.7	17.6	21	23.2	22.1	19.6	13.6	6.7	2.6	-4.6	-3.2	-1	3.1	6.5	9.8	11.6	11.1	8.7	4.3	0.3	-3	-1.7	0.3	3.9	8.4	12.1	15.4	17.4	16.6	14.2	9	3.5	-0.2	80	61	56	64
Pab	8_Lappko	7	19	282	9	730_KLAS	48.9667	18.8667	700	-2.5	0.6	5.6	12.4	16.7	20	21.9	21.5	18.4	12.5	4.7	-0.8	-10.6	-7.8	-4.2	0.8	4.8	8.1	9.2	8.8	6.2	2	-1.4	-6.6	-6.5	-3.6	0.7	6.6	10.7	14	15.6	15.1	12.3	7.3	1.6	-3.7	45	52	46	58
Pab	8_Lappko	7	19	390	12	733_OEST	60.5	11	275	-5.2	-4.2	1.3	7.1	13.9	18.5	20.2	18.5	13.6	7.5	1	-2.7	-11	-11.1	-6.8	-1.6	3.5	8.3	10.3	9.3	5.7	1.5	-3.7	-7.9	-8.1	-7.6	-2.7	2.8	8.7	13.4	15.2	13.9	9.6	4.5	-1.3	-5.3	44	38	25	40
Pab	8_Lappko	7	19	366	15	734_BOGS	59.9667	10.65	160	-3.3	-2.5	2.6	8.4	14.9	19.5	21	19.6	14.7	8.8	2.5	-0.9	-8.7	-8.9	-5	-0.2	5	9.8	11.6	11	7.4	3.1	-1.9	-5.6	-6	-5.7	-1.2	4.1	10	14.6	16.3	15.3	11	6	0.3	-3.2	49	40	27	44
Pab	8_Lappko	7	19	219	5	735_KNIT	47.2	14.8167	1300	-4.8	-1.6	3.4	8.7	13.2	16.8	18.5	17.7	14.3	8.4	1.3	-3.9	-12.7	-10.7	-7.1	-2.1	2	5.6	6.8	6.1	3.3	-1.5	-5.4	-10	-8.8	-6.1	-1.8	3.3	7.6	11.2	12.7	11.9	8.8	3.4	-2	-7	32	32	36	48
Pab	8_Lappko	7	19	381	20	743_WITE	55.0833	30.1667	150	-6	-4.1	0.4	9.9	18	21.4	22.7	21.6	16.3	9.3	2.2	-2.6	-12.9	-11.5	-7.4	0.7	6.7	10.6	12.1	11.3	6.8	2.4	-2.6	-8	-9.4	-7.8	-3.5	5.3	12.4	16	17.4	16.4	11.5	5.8	-0.2	-5.3	36	30	33	41
Pab	8_Lappko	7	19	360	17	744_TERE	56.5	32	200	-6.9	-5.6	-1.1	8.6	16.7	21.1	22.4	21	15.2	8.1	1	-3.3	-14.1	-13.6	-10.1	-1.1	4.9	9.4	11	10.4	5.7	1.5	-4.2	-9.2	-10.5	-9.6	-5.6	3.8	10.8	15.3	16.7	15.7	10.4	4.8	-1.6	-6.3	31	27	25	42
Pab	8_Lappko	7	19	282	8	746_WISM	53.8333	11.3333	100	1.2	1.6	5.3	10.4	15.3	19.4	20.9	20.4	18.2	12.5	6.8	3.3	-4	-4	-1.9	2.6	6.4	10.4	12.5	12.3	10	6.2	2.1	-1	-1.4	-1.2	1.7	6.5	10.9	14.9	16.7	16.4	14.1	9.4	4.5	1.1	49	41	34	42
Pab	8_Lappko	7	19	378	5	749_CUCU	47.3333	25	1410	-4.6	-2.5	2.3	8.9	13.2	16	17.8	17.8	15.1	9.6	2.8	-2.4	-13.6	-10.6	-7.1	-2.3	2.2	5.4	6.9	6.8	3.3	-1.6	-4.5	-9.3	-9.1	-6.6	-2.4	3.3	7.7	10.7	12.3	12.3	9.2	4	-0.8	-5.8	40	42	37	55
Pab	8_Lappko	7	19	441	2	754_HRAB	48.9833	20.1833	900	-2.4	-0.4	3.7	10.5	15	18.4	20.2	19.9	17.1	11.8	4.3	-0.8	-11.2	-8.8	-5.5	-0.2	4.2	7.5	8.9	8.4	5.4	1	-2.3	-7.4	-6.8	-4.6	-0.9	5.2	9.6	12.9	14.6	14.1	11.3	6.4	1	-4.1	36	37	39	55
Pab	8_Lappko	7	19	363	7	755_MARG	47.75	25.75	670	-2.6	-0.6	4.6	12.8	17.9	21.1	22.5	22.3	18.9	12.4	5.6	0.2	-10.4	-8	-4.3	1.3	6.3	9.8	11.6	11.2	7.2	2	-1.2	-6.1	-6.5	-4.3	0.2	7.1	12.1	15.5	17.1	16.7	13.1	7.2	2.2	-2.9	33	33	31	49
Pab	8_Lappko	7	19	456	16	756_VERI	58.0833	27.4167	30	-6	-5	-0.3	8	16	20.4	22	20.4	15.4	8.6	1.6	-2.5	-11.8	-11.3	-7.8	0.1	5.8	10.4	12.2	11.4	7.4	3	-2	-7	-8.9	-8.2	-4.1	4	10.9	15.4	17.1	15.9	11.4	5.8	-0.2	-4.8	33	29	28	39
Pab	8_Lappko	7	19	315	10	758_VORA	47.4	15.8833	1200	-4	-1.3	3.5	9.1	13.6	16.8	18.7	17.9	14.6	9	1.9	-2.6	-11.3	-9.2	-6.3	-1.5	2.6	6	7.3	6.8	3.9	-0.6	-4.3	-8.3	-7.6	-5.2	-1.4	3.8	8.1	11.4	13	12.4	9.3	4.2	-1.2	-5.5	35	44	42	56
Pab	8_Lappko	7	19	294	6	759_VEIT	47.65	15.5833	1000	-2.9	-0.3	4.2	10	14.7	17.9	19.8	19	15.5	9.8	3.1	-1.5	-9.8	-8	-5.1	-0.4	3.7	7.2	8.7	8.1	5.2	0.7	-2.9	-6.8	-6.4	-4.1	-0.5	4.8	9.2	12.5	14.2	13.6	10.4	5.3	0.1	-4.2	70	55	52	59
Pab	8_Lappko	7	19	408	9	764_PRZE	54.1667	21.95	150	-4.5	-3.5	2.5	11.5	17.6	21.1	22.8	22	17.9	11.5	3.9	-0.8	-10	-9.3	-4.3	2.7	7.1	10.4	12.7	12	8.8	4.4	-0.5	-5.5	-7.3	-6.4	-0.9	7.1	12.4	15.8	17.7	17	13.4	8	1.7	-3.2	41	33	31	44
Pab	8_Lappko	7	19	261	9	765_STUE	47.3333	15.6	640	-1.1	1.4	5.9	11.9	16.9	20.3	21.9	21.5	17.8	11.9	5.1	0.6	-7.6	-6.1	-3	1.8	6	9.5	11	10.6	7.5	2.9	-0.5	-4.4	-4.3	-2.4	1.5	6.9	11.5	14.9	16.5	16	12.7	7.4	2.3	-1.9	46	51	52	57
Pab	8_Lappko	7	19	273	3	766_DOBR	49.7833	14.2	420	-0.6	1.7	6.9	13.2	18.1	21.4	23.3	22.6	19	12.7	5.3	1.2	-6.4	-5.1	-2	2.5	6.7	10.2	11.8	11.3	8.3	3.6	-0.3	-3.9	-3.5	-1.7	2.5	7.9	12.4	15.8	17.5	17	13.6	8.2	2.5	-1.3	29	28	31	38
Pab	8_Lappko	7	19	246	8	768_VALL	62.3333	14.1333	450	-6.2	-4.9	0.3	5.6	11.9	17	18.6	17.1	12.2	6.2	0.3	-3	-13.5	-12.9	-8.9	-3.3	1.7	6.9	9	8.3	4.9	0.5	-4.7	-9	-9.9	-8.9	-4.3	1.2	6.8	11.9	13.8	12.7	8.5	3.4	-2.2	-6	41	30	31	39
Pab	8_Lappko	7	19	321	5	770_VAL_	46.2833	11.4667	1100	-0.1	2.7	7.2	12.5	16.2	20.3	22.6	21.4	19.3	12.4	5.9	1.5	-8.1	-6	-2.4	2	5.2	8.8	10.3	10.1	8.2	2.8	-1	-5.5	-4.1	-1.6	2.4	7.2	10.7	14.6	16.5	15.7	13.7	7.6	2.4	-2	47	37	43	57
Pab	8_Lappko	7	19	369	12	773_JASI	48.25	24.3333	700	-2.5	-0.6	4.3	12.2	17.2	20.5	22.2	21.9	18.4	12.4	5.4	0.3	-9.5	-7	-3.4	2	6.3	9.6	11.1	10.9	7.1	2.3	-0.9	-5.1	-6	-3.8	0.4	7.1	11.8	15.1	16.7	16.4	12.8	7.3	2.2	-2.4	46	51	43	60
Pab	8_Lappko	7	19	255	11	778_BORO	42.25	23.5833	1300	-0.5	0.9	4	9.5	14.5	18.2	20.8	21.1	17.7	12.3	7.1	2.3	-7.3	-6	-4.2	-0.1	4.4	7.8	9.5	10	7	2.9	0	-4	-3.9	-2.5	-0.1	4.7	9.4	13	15.1	15.5	12.4	7.6	3.5	-0.8	69	51	54	60
Pab	8_Lappko	7	19	366	20	779_URJA	61.1	23.5	100	-5.4	-4.7	-0.3	6.7	14.4	19.7	21.3	19.2	13.7	7.5	1.7	-2	-11.9	-12.1	-9.1	-1.7	3.2	8.6	10.8	9.9	6.3	2.1	-2.6	-7.3	-8.7	-8.4	-4.7	2.5	8.8	14.2	16	14.5	10	4.8	-0.4	-4.7	37	28	23	32
Pab	8_Lappko	7	19	252	10	790_MALI	47.5	9.83333	600	0.5	3.2	8.1	13.3	17.3	20.9	22.3	21.3	18.8	12.9	6.6	1.8	-6.1	-4.7	-1.3	3.1	6.4	10	11.7	10.9	8.6	4.3	-0.1	-4.2	-2.8	-0.8	3.4	8.2	11.8	15.4	17	16.1	13.7	8.6	3.3	-1.2	117	105	102	124
Pab	8_Lappko	7	19	390	3	796_BUEK	48.0667	20.6333	615	-2.1	1.3	6.5	13.7	18.4	21.6	23.7	23.1	19.9	13.7	6.1	0.6	-8.9	-6	-3.1	2.2	6.7	10.3	11.6	11.1	7.8	2.6	-0.2	-5	-5.5	-2.3	1.7	8	12.6	15.9	17.7	17.1	13.9	8.2	2.9	-2.2	40	41	35	52
Pab	8_Lappko	7	19	318	13	798_GURK	46.8667	14.2833	1300	-4.7	-1.4	3.5	8.6	13.3	16.9	18.7	18	14.7	8.6	1.5	-3.4	-12.5	-10.3	-6.6	-1.9	2.1	5.8	7	6.3	3.8	-1	-4.8	-9.5	-8.6	-5.9	-1.5	3.4	7.7	11.4	12.9	12.1	9.2	3.8	-1.6	-6.4	33	36	39	62
Psy	1002_Egy	1	16	496.667		c15	61.67	33.67	141	-8.7	-7.8	-2.4	5.1	12.2	18.1	20.3	18.6	12.4	5.4	-0.5	-5	-15.8	-14.9	-11.4	-3.1	2.3	7.9	10.5	9.8	5.3	0.3	-4.9	-10.8	-12.3	-11.4	-6.9	1	7.3	13	15.4	14.2	8.9	2.8	-2.7	-7.9	34	25	27	39
Psy	1002_Egy	1	16	340		c2	67	32.55	11	-9.1	-9.1	-4.4	2	8.1	15.4	18.9	16.6	10.6	3.6	-1.6	-6.4	-17.2	-17.3	-13.7	-6.3	0	6	9	7.8	3.4	-2	-7.4	-13.8	-13.2	-13.2	-9	-2.2	4	10.7	14	12.2	7	0.8	-4.5	-10.1	30	27	28	26
Psy	1002_Egy	1	16	678.333		c24	58.17	26.47	85	-5.6	-4.8	-0.5	7.2	15.2	19.7	21.3	20	15	8.5	1.8	-2.2	-11.3	-11.1	-7.9	-0.2	5.6	10.1	12.1	11.5	7.6	3.1	-1.7	-6.6	-8.4	-8	-4.2	3.5	10.4	14.9	16.7	15.8	11.3	5.8	0	-4.4	35	28	27	38
Psy	1002_Egy	1	16	640		c25	56.45	25.17	78	-4.7	-3.6	0.9	9.1	16.3	20.3	21.5	20.6	16	9.6	3	-1.3	-10.4	-9.9	-6.4	1	6.3	10.3	12.1	11.5	7.9	3.6	-0.8	-5.8	-7.6	-6.8	-2.7	5	11.3	15.3	16.8	16	11.9	6.6	1.1	-3.6	37	31	35	42
Psy	1002_Egy	1	16	755		c37	50.17	32.17	117	-3.2	-2.1	2.8	13.6	20.9	24.6	26.3	25.5	20.7	12.7	5.1	0	-10.1	-9	-4.8	3.4	9.6	13	14.6	13.5	8.5	3.3	-1.2	-5.8	-6.6	-5.5	-1	8.5	15.3	18.8	20.5	19.5	14.6	8	2	-2.9	37	35	30	37
Psy	1002_Egy	1	16	745		c38	52.02	34	175	-5.4	-4.6	-0.1	10.9	19	22.8	24.6	23.5	18.2	10.5	2.7	-2	-12.6	-11.8	-7.4	1.5	7.8	11.6	13.4	12.2	7.1	1.9	-3.2	-7.8	-9	-8.2	-3.7	6.2	13.4	17.2	19	17.9	12.6	6.2	-0.3	-4.9	39	32	33	38
Psy	1002_Egy	1	16	628.333		c4	62.9	40.4	105	-9.4	-9	-3.8	4.4	11.6	18.3	21.3	19.5	12	4.5	-1.7	-6.4	-16.8	-16.6	-13	-4.2	2	7.5	10.4	9.6	4.5	-0.4	-6.4	-12.8	-13.1	-12.8	-8.4	0.1	6.8	12.9	15.9	14.6	8.2	2	-4	-9.6	38	29	30	37
Psy	1002_Egy	1	16	665		c43	55.53	38.95	120	-8.2	-6.6	-1.3	9.3	17.9	22.4	23.9	22.6	16.4	7.9	0.3	-4.6	-14.9	-14.1	-8.7	0.8	7.4	11.4	13.5	12.2	7	1.6	-4.6	-9.9	-11.5	-10.3	-5	5.1	12.7	16.9	18.7	17.4	11.7	4.7	-2.2	-7.2	36	27	29	36
Psy	1002_Egy	1	16	671.667		c45	56.67	43.47	106	-9.3	-7.8	-1.7	8.7	17.5	21.9	23.5	22.1	15.2	6.6	-0.8	-5.8	-15.3	-14.6	-9	0.5	7.5	11.8	14.1	12.7	7.3	1.1	-5.4	-11.1	-12.3	-11.2	-5.4	4.6	12.5	16.9	18.8	17.4	11.3	3.9	-3.1	-8.5	39	27	27	37
Psy	1002_Egy	1	16	586.667		c48	58	42	165	-9.6	-7.8	-1.8	7.3	16.4	20.7	22.5	21	14.4	6.2	-1	-6.2	-16.1	-15.3	-9.9	-0.9	6.3	10.5	12.8	11.2	6	0.4	-5.8	-11.9	-12.9	-11.5	-5.8	3.2	11.4	15.6	17.6	16.1	10.2	3.3	-3.4	-9.1	38	30	29	38
Psy	1002_Egy	1	16	701.667		c50	54.67	39.75	95	-8.1	-6.9	-1.5	9.4	18.8	23.2	24.6	23.5	17.3	8.4	0.4	-4.3	-15.2	-14.8	-9.2	0.9	7.9	11.6	13.6	12.4	7.2	1.6	-4.9	-9.9	-11.6	-10.8	-5.3	5.2	13.4	17.4	19.1	18	12.3	5	-2.2	-7.1	33	24	27	33
Psy	1002_Egy	1	16	696.667		c51	53	34	179	-6.1	-5.4	-1.3	9.6	18.2	22.1	24	22.6	17	9.6	1.9	-2.5	-13	-12.5	-8.6	0.6	7	11.1	13.1	11.7	6.5	1.6	-3.6	-8.3	-9.5	-9	-5	5.1	12.6	16.6	18.5	17.1	11.7	5.6	-0.9	-5.4	33	29	30	38
Psy	1002_Egy	1	16	723.333		c54	53.2	41.33	137	-7.6	-6.6	-1.6	10	19.5	23.8	25.3	24.4	18.2	9.1	0.9	-4	-15.2	-14.5	-8.8	1.4	8.7	12.4	14.2	13.2	7.5	1.3	-5	-10.3	-11.4	-10.5	-5.2	5.7	14.1	18.1	19.8	18.8	12.8	5.2	-2.1	-7.2	36	27	30	32
Psy	1002_Egy	1	16	745		c55	51.63	39.47	135	-6.5	-5	-0.4	11.9	20.6	24.7	26.3	25.3	19.3	10.3	2	-2.8	-13.6	-12.7	-7.4	2.4	8.9	12.6	14.4	13.5	8.2	2.1	-4	-8.7	-10.1	-8.9	-3.9	7.2	14.8	18.7	20.3	19.4	13.7	6.2	-1	-5.8	37	29	28	36
Psy	13_Khark	1	15			c15	61.67	33.67	141	-8.7	-7.8	-2.4	5.1	12.2	18.1	20.3	18.6	12.4	5.4	-0.5	-5	-15.8	-14.9	-11.4	-3.1	2.3	7.9	10.5	9.8	5.3	0.3	-4.9	-10.8	-12.3	-11.4	-6.9	1	7.3	13	15.4	14.2	8.9	2.8	-2.7	-7.9	34	25	27	39
Psy	13_Khark	1	15			c2	67	32.55	11	-9.1	-9.1	-4.4	2	8.1	15.4	18.9	16.6	10.6	3.6	-1.6	-6.4	-17.2	-17.3	-13.7	-6.3	0	6	9	7.8	3.4	-2	-7.4	-13.8	-13.2	-13.2	-9	-2.2	4	10.7	14	12.2	7	0.8	-4.5	-10.1	30	27	28	26
Psy	13_Khark	1	15	580		c24	58.17	26.47	85	-5.6	-4.8	-0.5	7.2	15.2	19.7	21.3	20	15	8.5	1.8	-2.2	-11.3	-11.1	-7.9	-0.2	5.6	10.1	12.1	11.5	7.6	3.1	-1.7	-6.6	-8.4	-8	-4.2	3.5	10.4	14.9	16.7	15.8	11.3	5.8	0	-4.4	35	28	27	38
Psy	13_Khark	1	15	620		c25	56.45	25.17	78	-4.7	-3.6	0.9	9.1	16.3	20.3	21.5	20.6	16	9.6	3	-1.3	-10.4	-9.9	-6.4	1	6.3	10.3	12.1	11.5	7.9	3.6	-0.8	-5.8	-7.6	-6.8	-2.7	5	11.3	15.3	16.8	16	11.9	6.6	1.1	-3.6	37	31	35	42
Psy	13_Khark	1	15	580		c37	50.17	32.17	117	-3.2	-2.1	2.8	13.6	20.9	24.6	26.3	25.5	20.7	12.7	5.1	0	-10.1	-9	-4.8	3.4	9.6	13	14.6	13.5	8.5	3.3	-1.2	-5.8	-6.6	-5.5	-1	8.5	15.3	18.8	20.5	19.5	14.6	8	2	-2.9	37	35	30	37
Psy	13_Khark	1	15	610		c38	52.02	34	175	-5.4	-4.6	-0.1	10.9	19	22.8	24.6	23.5	18.2	10.5	2.7	-2	-12.6	-11.8	-7.4	1.5	7.8	11.6	13.4	12.2	7.1	1.9	-3.2	-7.8	-9	-8.2	-3.7	6.2	13.4	17.2	19	17.9	12.6	6.2	-0.3	-4.9	39	32	33	38
Psy	13_Khark	1	15			c4	62.9	40.4	105	-9.4	-9	-3.8	4.4	11.6	18.3	21.3	19.5	12	4.5	-1.7	-6.4	-16.8	-16.6	-13	-4.2	2	7.5	10.4	9.6	4.5	-0.4	-6.4	-12.8	-13.1	-12.8	-8.4	0.1	6.8	12.9	15.9	14.6	8.2	2	-4	-9.6	38	29	30	37
Psy	13_Khark	1	15	550		c43	55.53	38.95	120	-8.2	-6.6	-1.3	9.3	17.9	22.4	23.9	22.6	16.4	7.9	0.3	-4.6	-14.9	-14.1	-8.7	0.8	7.4	11.4	13.5	12.2	7	1.6	-4.6	-9.9	-11.5	-10.3	-5	5.1	12.7	16.9	18.7	17.4	11.7	4.7	-2.2	-7.2	36	27	29	36
Psy	13_Khark	1	15	540		c45	56.67	43.47	106	-9.3	-7.8	-1.7	8.7	17.5	21.9	23.5	22.1	15.2	6.6	-0.8	-5.8	-15.3	-14.6	-9	0.5	7.5	11.8	14.1	12.7	7.3	1.1	-5.4	-11.1	-12.3	-11.2	-5.4	4.6	12.5	16.9	18.8	17.4	11.3	3.9	-3.1	-8.5	39	27	27	37
Psy	13_Khark	1	15			c48	58	42	165	-9.6	-7.8	-1.8	7.3	16.4	20.7	22.5	21	14.4	6.2	-1	-6.2	-16.1	-15.3	-9.9	-0.9	6.3	10.5	12.8	11.2	6	0.4	-5.8	-11.9	-12.9	-11.5	-5.8	3.2	11.4	15.6	17.6	16.1	10.2	3.3	-3.4	-9.1	38	30	29	38
Psy	13_Khark	1	15	670		c50	54.67	39.75	95	-8.1	-6.9	-1.5	9.4	18.8	23.2	24.6	23.5	17.3	8.4	0.4	-4.3	-15.2	-14.8	-9.2	0.9	7.9	11.6	13.6	12.4	7.2	1.6	-4.9	-9.9	-11.6	-10.8	-5.3	5.2	13.4	17.4	19.1	18	12.3	5	-2.2	-7.1	33	24	27	33
Psy	13_Khark	1	15	600		c51	53	34	179	-6.1	-5.4	-1.3	9.6	18.2	22.1	24	22.6	17	9.6	1.9	-2.5	-13	-12.5	-8.6	0.6	7	11.1	13.1	11.7	6.5	1.6	-3.6	-8.3	-9.5	-9	-5	5.1	12.6	16.6	18.5	17.1	11.7	5.6	-0.9	-5.4	33	29	30	38
Psy	13_Khark	1	15	530		c54	53.2	41.33	137	-7.6	-6.6	-1.6	10	19.5	23.8	25.3	24.4	18.2	9.1	0.9	-4	-15.2	-14.5	-8.8	1.4	8.7	12.4	14.2	13.2	7.5	1.3	-5	-10.3	-11.4	-10.5	-5.2	5.7	14.1	18.1	19.8	18.8	12.8	5.2	-2.1	-7.2	36	27	30	32
Psy	13_Khark	1	15	610		c55	51.63	39.47	135	-6.5	-5	-0.4	11.9	20.6	24.7	26.3	25.3	19.3	10.3	2	-2.8	-13.6	-12.7	-7.4	2.4	8.9	12.6	14.4	13.5	8.2	2.1	-4	-8.7	-10.1	-8.9	-3.9	7.2	14.8	18.7	20.3	19.4	13.7	6.2	-1	-5.8	37	29	28	36
Psy	16_Kovro	1	17	480		c15	61.67	33.67	141	-8.7	-7.8	-2.4	5.1	12.2	18.1	20.3	18.6	12.4	5.4	-0.5	-5	-15.8	-14.9	-11.4	-3.1	2.3	7.9	10.5	9.8	5.3	0.3	-4.9	-10.8	-12.3	-11.4	-6.9	1	7.3	13	15.4	14.2	8.9	2.8	-2.7	-7.9	34	25	27	39
Psy	16_Kovro	1	17	260		c2	67	32.55	11	-9.1	-9.1	-4.4	2	8.1	15.4	18.9	16.6	10.6	3.6	-1.6	-6.4	-17.2	-17.3	-13.7	-6.3	0	6	9	7.8	3.4	-2	-7.4	-13.8	-13.2	-13.2	-9	-2.2	4	10.7	14	12.2	7	0.8	-4.5	-10.1	30	27	28	26
Psy	16_Kovro	1	17	540		c24	58.17	26.47	85	-5.6	-4.8	-0.5	7.2	15.2	19.7	21.3	20	15	8.5	1.8	-2.2	-11.3	-11.1	-7.9	-0.2	5.6	10.1	12.1	11.5	7.6	3.1	-1.7	-6.6	-8.4	-8	-4.2	3.5	10.4	14.9	16.7	15.8	11.3	5.8	0	-4.4	35	28	27	38
Psy	16_Kovro	1	17	560		c25	56.45	25.17	78	-4.7	-3.6	0.9	9.1	16.3	20.3	21.5	20.6	16	9.6	3	-1.3	-10.4	-9.9	-6.4	1	6.3	10.3	12.1	11.5	7.9	3.6	-0.8	-5.8	-7.6	-6.8	-2.7	5	11.3	15.3	16.8	16	11.9	6.6	1.1	-3.6	37	31	35	42
Psy	16_Kovro	1	17	510		c37	50.17	32.17	117	-3.2	-2.1	2.8	13.6	20.9	24.6	26.3	25.5	20.7	12.7	5.1	0	-10.1	-9	-4.8	3.4	9.6	13	14.6	13.5	8.5	3.3	-1.2	-5.8	-6.6	-5.5	-1	8.5	15.3	18.8	20.5	19.5	14.6	8	2	-2.9	37	35	30	37
Psy	16_Kovro	1	17	470		c38	52.02	34	175	-5.4	-4.6	-0.1	10.9	19	22.8	24.6	23.5	18.2	10.5	2.7	-2	-12.6	-11.8	-7.4	1.5	7.8	11.6	13.4	12.2	7.1	1.9	-3.2	-7.8	-9	-8.2	-3.7	6.2	13.4	17.2	19	17.9	12.6	6.2	-0.3	-4.9	39	32	33	38
Psy	16_Kovro	1	17	490		c4	62.9	40.4	105	-9.4	-9	-3.8	4.4	11.6	18.3	21.3	19.5	12	4.5	-1.7	-6.4	-16.8	-16.6	-13	-4.2	2	7.5	10.4	9.6	4.5	-0.4	-6.4	-12.8	-13.1	-12.8	-8.4	0.1	6.8	12.9	15.9	14.6	8.2	2	-4	-9.6	38	29	30	37
Psy	16_Kovro	1	17	630		c43	55.53	38.95	120	-8.2	-6.6	-1.3	9.3	17.9	22.4	23.9	22.6	16.4	7.9	0.3	-4.6	-14.9	-14.1	-8.7	0.8	7.4	11.4	13.5	12.2	7	1.6	-4.6	-9.9	-11.5	-10.3	-5	5.1	12.7	16.9	18.7	17.4	11.7	4.7	-2.2	-7.2	36	27	29	36
Psy	16_Kovro	1	17	600		c45	56.67	43.47	106	-9.3	-7.8	-1.7	8.7	17.5	21.9	23.5	22.1	15.2	6.6	-0.8	-5.8	-15.3	-14.6	-9	0.5	7.5	11.8	14.1	12.7	7.3	1.1	-5.4	-11.1	-12.3	-11.2	-5.4	4.6	12.5	16.9	18.8	17.4	11.3	3.9	-3.1	-8.5	39	27	27	37
Psy	16_Kovro	1	17	580		c48	58	42	165	-9.6	-7.8	-1.8	7.3	16.4	20.7	22.5	21	14.4	6.2	-1	-6.2	-16.1	-15.3	-9.9	-0.9	6.3	10.5	12.8	11.2	6	0.4	-5.8	-11.9	-12.9	-11.5	-5.8	3.2	11.4	15.6	17.6	16.1	10.2	3.3	-3.4	-9.1	38	30	29	38
Psy	16_Kovro	1	17	500		c50	54.67	39.75	95	-8.1	-6.9	-1.5	9.4	18.8	23.2	24.6	23.5	17.3	8.4	0.4	-4.3	-15.2	-14.8	-9.2	0.9	7.9	11.6	13.6	12.4	7.2	1.6	-4.9	-9.9	-11.6	-10.8	-5.3	5.2	13.4	17.4	19.1	18	12.3	5	-2.2	-7.1	33	24	27	33
Psy	16_Kovro	1	17	580		c51	53	34	179	-6.1	-5.4	-1.3	9.6	18.2	22.1	24	22.6	17	9.6	1.9	-2.5	-13	-12.5	-8.6	0.6	7	11.1	13.1	11.7	6.5	1.6	-3.6	-8.3	-9.5	-9	-5	5.1	12.6	16.6	18.5	17.1	11.7	5.6	-0.9	-5.4	33	29	30	38
Psy	16_Kovro	1	17	610		c54	53.2	41.33	137	-7.6	-6.6	-1.6	10	19.5	23.8	25.3	24.4	18.2	9.1	0.9	-4	-15.2	-14.5	-8.8	1.4	8.7	12.4	14.2	13.2	7.5	1.3	-5	-10.3	-11.4	-10.5	-5.2	5.7	14.1	18.1	19.8	18.8	12.8	5.2	-2.1	-7.2	36	27	30	32
Psy	16_Kovro	1	17	530		c55	51.63	39.47	135	-6.5	-5	-0.4	11.9	20.6	24.7	26.3	25.3	19.3	10.3	2	-2.8	-13.6	-12.7	-7.4	2.4	8.9	12.6	14.4	13.5	8.2	2.1	-4	-8.7	-10.1	-8.9	-3.9	7.2	14.8	18.7	20.3	19.4	13.7	6.2	-1	-5.8	37	29	28	36
Psy	17_David	1	17	425		c15	61.67	33.67	141	-8.7	-7.8	-2.4	5.1	12.2	18.1	20.3	18.6	12.4	5.4	-0.5	-5	-15.8	-14.9	-11.4	-3.1	2.3	7.9	10.5	9.8	5.3	0.3	-4.9	-10.8	-12.3	-11.4	-6.9	1	7.3	13	15.4	14.2	8.9	2.8	-2.7	-7.9	34	25	27	39
Psy	17_David	1	17	274		c2	67	32.55	11	-9.1	-9.1	-4.4	2	8.1	15.4	18.9	16.6	10.6	3.6	-1.6	-6.4	-17.2	-17.3	-13.7	-6.3	0	6	9	7.8	3.4	-2	-7.4	-13.8	-13.2	-13.2	-9	-2.2	4	10.7	14	12.2	7	0.8	-4.5	-10.1	30	27	28	26
Psy	17_David	1	17	434		c24	58.17	26.47	85	-5.6	-4.8	-0.5	7.2	15.2	19.7	21.3	20	15	8.5	1.8	-2.2	-11.3	-11.1	-7.9	-0.2	5.6	10.1	12.1	11.5	7.6	3.1	-1.7	-6.6	-8.4	-8	-4.2	3.5	10.4	14.9	16.7	15.8	11.3	5.8	0	-4.4	35	28	27	38
Psy	17_David	1	17	463		c25	56.45	25.17	78	-4.7	-3.6	0.9	9.1	16.3	20.3	21.5	20.6	16	9.6	3	-1.3	-10.4	-9.9	-6.4	1	6.3	10.3	12.1	11.5	7.9	3.6	-0.8	-5.8	-7.6	-6.8	-2.7	5	11.3	15.3	16.8	16	11.9	6.6	1.1	-3.6	37	31	35	42
Psy	17_David	1	17	474		c37	50.17	32.17	117	-3.2	-2.1	2.8	13.6	20.9	24.6	26.3	25.5	20.7	12.7	5.1	0	-10.1	-9	-4.8	3.4	9.6	13	14.6	13.5	8.5	3.3	-1.2	-5.8	-6.6	-5.5	-1	8.5	15.3	18.8	20.5	19.5	14.6	8	2	-2.9	37	35	30	37
Psy	17_David	1	17	494		c38	52.02	34	175	-5.4	-4.6	-0.1	10.9	19	22.8	24.6	23.5	18.2	10.5	2.7	-2	-12.6	-11.8	-7.4	1.5	7.8	11.6	13.4	12.2	7.1	1.9	-3.2	-7.8	-9	-8.2	-3.7	6.2	13.4	17.2	19	17.9	12.6	6.2	-0.3	-4.9	39	32	33	38
Psy	17_David	1	17	392		c4	62.9	40.4	105	-9.4	-9	-3.8	4.4	11.6	18.3	21.3	19.5	12	4.5	-1.7	-6.4	-16.8	-16.6	-13	-4.2	2	7.5	10.4	9.6	4.5	-0.4	-6.4	-12.8	-13.1	-12.8	-8.4	0.1	6.8	12.9	15.9	14.6	8.2	2	-4	-9.6	38	29	30	37
Psy	17_David	1	17	458		c43	55.53	38.95	120	-8.2	-6.6	-1.3	9.3	17.9	22.4	23.9	22.6	16.4	7.9	0.3	-4.6	-14.9	-14.1	-8.7	0.8	7.4	11.4	13.5	12.2	7	1.6	-4.6	-9.9	-11.5	-10.3	-5	5.1	12.7	16.9	18.7	17.4	11.7	4.7	-2.2	-7.2	36	27	29	36
Psy	17_David	1	17	421		c45	56.67	43.47	106	-9.3	-7.8	-1.7	8.7	17.5	21.9	23.5	22.1	15.2	6.6	-0.8	-5.8	-15.3	-14.6	-9	0.5	7.5	11.8	14.1	12.7	7.3	1.1	-5.4	-11.1	-12.3	-11.2	-5.4	4.6	12.5	16.9	18.8	17.4	11.3	3.9	-3.1	-8.5	39	27	27	37
Psy	17_David	1	17	401		c48	58	42	165	-9.6	-7.8	-1.8	7.3	16.4	20.7	22.5	21	14.4	6.2	-1	-6.2	-16.1	-15.3	-9.9	-0.9	6.3	10.5	12.8	11.2	6	0.4	-5.8	-11.9	-12.9	-11.5	-5.8	3.2	11.4	15.6	17.6	16.1	10.2	3.3	-3.4	-9.1	38	30	29	38
Psy	17_David	1	17	444		c50	54.67	39.75	95	-8.1	-6.9	-1.5	9.4	18.8	23.2	24.6	23.5	17.3	8.4	0.4	-4.3	-15.2	-14.8	-9.2	0.9	7.9	11.6	13.6	12.4	7.2	1.6	-4.9	-9.9	-11.6	-10.8	-5.3	5.2	13.4	17.4	19.1	18	12.3	5	-2.2	-7.1	33	24	27	33
Psy	17_David	1	17	477		c51	53	34	179	-6.1	-5.4	-1.3	9.6	18.2	22.1	24	22.6	17	9.6	1.9	-2.5	-13	-12.5	-8.6	0.6	7	11.1	13.1	11.7	6.5	1.6	-3.6	-8.3	-9.5	-9	-5	5.1	12.6	16.6	18.5	17.1	11.7	5.6	-0.9	-5.4	33	29	30	38
Psy	17_David	1	17	489		c54	53.2	41.33	137	-7.6	-6.6	-1.6	10	19.5	23.8	25.3	24.4	18.2	9.1	0.9	-4	-15.2	-14.5	-8.8	1.4	8.7	12.4	14.2	13.2	7.5	1.3	-5	-10.3	-11.4	-10.5	-5.2	5.7	14.1	18.1	19.8	18.8	12.8	5.2	-2.1	-7.2	36	27	30	32
Psy	17_David	1	17	539		c55	51.63	39.47	135	-6.5	-5	-0.4	11.9	20.6	24.7	26.3	25.3	19.3	10.3	2	-2.8	-13.6	-12.7	-7.4	2.4	8.9	12.6	14.4	13.5	8.2	2.1	-4	-8.7	-10.1	-8.9	-3.9	7.2	14.8	18.7	20.3	19.4	13.7	6.2	-1	-5.8	37	29	28	36
Qpe	T-DE-001	1001	8	312.42	84	1	51.7942	-2.4895	90.6667	6.4	6.6	8.9	12.2	15.4	18.9	20.4	19.9	17.5	13.9	9.3	7.3	1.1	1	2	4.4	7.1	10.3	11.8	11.6	9.5	7.1	3.4	1.9	3.8	3.8	5.5	8.3	11.3	14.6	16.1	15.7	13.5	10.5	6.4	4.6	81	56	64	54
Qpe	T-DE-001	1002	8	215.176	87	1	51.7942	-2.4895	90.6667	6.4	6.6	8.9	12.2	15.4	18.9	20.4	19.9	17.5	13.9	9.3	7.3	1.1	1	2	4.4	7.1	10.3	11.8	11.6	9.5	7.1	3.4	1.9	3.8	3.8	5.5	8.3	11.3	14.6	16.1	15.7	13.5	10.5	6.4	4.6	81	56	64	54
Qpe	T-DE-001	1003	8	237.524	87	1	51.7942	-2.4895	90.6667	6.4	6.6	8.9	12.2	15.4	18.9	20.4	19.9	17.5	13.9	9.3	7.3	1.1	1	2	4.4	7.1	10.3	11.8	11.6	9.5	7.1	3.4	1.9	3.8	3.8	5.5	8.3	11.3	14.6	16.1	15.7	13.5	10.5	6.4	4.6	81	56	64	54
Qpe	T-DE-001	2005	8	229.624	89	1	51.7942	-2.4895	90.6667	6.4	6.6	8.9	12.2	15.4	18.9	20.4	19.9	17.5	13.9	9.3	7.3	1.1	1	2	4.4	7.1	10.3	11.8	11.6	9.5	7.1	3.4	1.9	3.8	3.8	5.5	8.3	11.3	14.6	16.1	15.7	13.5	10.5	6.4	4.6	81	56	64	54
Qpe	T-DE-001	2006	8	282.48	173	1	51.7942	-2.4895	90.6667	6.4	6.6	8.9	12.2	15.4	18.9	20.4	19.9	17.5	13.9	9.3	7.3	1.1	1	2	4.4	7.1	10.3	11.8	11.6	9.5	7.1	3.4	1.9	3.8	3.8	5.5	8.3	11.3	14.6	16.1	15.7	13.5	10.5	6.4	4.6	81	56	64	54
Qpe	T-DE-001	3010	8	317.201	89	1	51.7942	-2.4895	90.6667	6.4	6.6	8.9	12.2	15.4	18.9	20.4	19.9	17.5	13.9	9.3	7.3	1.1	1	2	4.4	7.1	10.3	11.8	11.6	9.5	7.1	3.4	1.9	3.8	3.8	5.5	8.3	11.3	14.6	16.1	15.7	13.5	10.5	6.4	4.6	81	56	64	54
Qpe	T-DE-001	3011	8	322.762	177	1	51.7942	-2.4895	90.6667	6.4	6.6	8.9	12.2	15.4	18.9	20.4	19.9	17.5	13.9	9.3	7.3	1.1	1	2	4.4	7.1	10.3	11.8	11.6	9.5	7.1	3.4	1.9	3.8	3.8	5.5	8.3	11.3	14.6	16.1	15.7	13.5	10.5	6.4	4.6	81	56	64	54
Qpe	T-DE-001	4013	8	234.877	43	21	46.4607	2.89067	270	6.1	7.8	12	15.1	18.5	22.2	24.7	24.1	21.7	16.3	10.3	6.4	-1	-0.3	1.4	4.2	7.3	10.6	12.3	12	10.2	6.1	2.8	-0.2	2.6	3.7	6.7	9.6	12.9	16.4	18.5	18.1	15.9	11.2	6.6	3.1	58	58	56	55
Qpe	T-DE-001	4014	8	237.472	45	21	46.4607	2.89067	270	6.1	7.8	12	15.1	18.5	22.2	24.7	24.1	21.7	16.3	10.3	6.4	-1	-0.3	1.4	4.2	7.3	10.6	12.3	12	10.2	6.1	2.8	-0.2	2.6	3.7	6.7	9.6	12.9	16.4	18.5	18.1	15.9	11.2	6.6	3.1	58	58	56	55
Qpe	T-DE-001	1001	8	236.312	87	26	51.948	-2.45	70	6.5	6.8	9.1	12.2	15.5	18.9	20.3	19.9	17.6	14.2	9.5	7.4	1.2	1.1	2.2	4.5	7.2	10.3	11.8	11.6	9.6	7.3	3.6	2.1	3.9	4	5.6	8.3	11.3	14.6	16.1	15.7	13.6	10.7	6.5	4.8	69	48	55	49
Qpe	T-DE-001	1002	8	217.089	90	26	51.948	-2.45	70	6.5	6.8	9.1	12.2	15.5	18.9	20.3	19.9	17.6	14.2	9.5	7.4	1.2	1.1	2.2	4.5	7.2	10.3	11.8	11.6	9.6	7.3	3.6	2.1	3.9	4	5.6	8.3	11.3	14.6	16.1	15.7	13.6	10.7	6.5	4.8	69	48	55	49
Qpe	T-DE-001	2008	8	241.8	180	26	51.948	-2.45	70	6.5	6.8	9.1	12.2	15.5	18.9	20.3	19.9	17.6	14.2	9.5	7.4	1.2	1.1	2.2	4.5	7.2	10.3	11.8	11.6	9.6	7.3	3.6	2.1	3.9	4	5.6	8.3	11.3	14.6	16.1	15.7	13.6	10.7	6.5	4.8	69	48	55	49
Qpe	T-DE-001	3010	8	251.266	87	26	51.948	-2.45	70	6.5	6.8	9.1	12.2	15.5	18.9	20.3	19.9	17.6	14.2	9.5	7.4	1.2	1.1	2.2	4.5	7.2	10.3	11.8	11.6	9.6	7.3	3.6	2.1	3.9	4	5.6	8.3	11.3	14.6	16.1	15.7	13.6	10.7	6.5	4.8	69	48	55	49
Qpe	T-DE-001	3012	8	269.7	88	26	51.948	-2.45	70	6.5	6.8	9.1	12.2	15.5	18.9	20.3	19.9	17.6	14.2	9.5	7.4	1.2	1.1	2.2	4.5	7.2	10.3	11.8	11.6	9.6	7.3	3.6	2.1	3.9	4	5.6	8.3	11.3	14.6	16.1	15.7	13.6	10.7	6.5	4.8	69	48	55	49
Qpe	T-DE-001	1004	8	163.23	89	260	56.071	9.597	25	2.7	3.3	5.4	9.2	14.7	18	19.3	19.1	15.9	11.6	7.3	4.3	-5.4	-5.4	-2	2.8	7.6	11	12.9	11.7	9.3	5.6	1.1	0.2	-1.3	-1	1.7	6	11.1	14.5	16.1	15.4	12.6	8.6	4.2	2.2	59	41	47	43
Qpe	T-DE-001	2007	8	225.78	88	260	56.071	9.597	25	2.7	3.3	5.4	9.2	14.7	18	19.3	19.1	15.9	11.6	7.3	4.3	-5.4	-5.4	-2	2.8	7.6	11	12.9	11.7	9.3	5.6	1.1	0.2	-1.3	-1	1.7	6	11.1	14.5	16.1	15.4	12.6	8.6	4.2	2.2	59	41	47	43
Qpe	T-DE-001	3010	8	178.321	86	260	56.071	9.597	25	2.7	3.3	5.4	9.2	14.7	18	19.3	19.1	15.9	11.6	7.3	4.3	-5.4	-5.4	-2	2.8	7.6	11	12.9	11.7	9.3	5.6	1.1	0.2	-1.3	-1	1.7	6	11.1	14.5	16.1	15.4	12.6	8.6	4.2	2.2	59	41	47	43
Qpe	T-DE-001	1003	8	272.573	88	263	53.707	9.762	10	2	3.1	6.7	11.8	17	20.3	21.5	21.4	18.6	13	7.3	3.7	-2.6	-2.5	-0.3	2.7	6.6	9.9	11.9	11.5	9	5.8	2.3	-0.8	-0.3	0.3	3.2	7.3	11.8	15.1	16.7	16.4	13.8	9.4	4.8	1.5	62	44	52	47
Qpe	T-DE-001	2008	8	293.858	90	263	53.707	9.762	10	2	3.1	6.7	11.8	17	20.3	21.5	21.4	18.6	13	7.3	3.7	-2.6	-2.5	-0.3	2.7	6.6	9.9	11.9	11.5	9	5.8	2.3	-0.8	-0.3	0.3	3.2	7.3	11.8	15.1	16.7	16.4	13.8	9.4	4.8	1.5	62	44	52	47
Qpe	T-DE-001	3009	8	284.777	90	263	53.707	9.762	10	2	3.1	6.7	11.8	17	20.3	21.5	21.4	18.6	13	7.3	3.7	-2.6	-2.5	-0.3	2.7	6.6	9.9	11.9	11.5	9	5.8	2.3	-0.8	-0.3	0.3	3.2	7.3	11.8	15.1	16.7	16.4	13.8	9.4	4.8	1.5	62	44	52	47
Qpe	T-DE-001	4013	8	168.499	72	277	40.917	31.667	1200	2.1	3.8	8.1	12.7	17.1	20.7	22.8	23	20.4	14.9	10.3	4.2	-4.5	-3.4	-1.1	2.7	6.5	9.2	11.4	11.1	8.7	5	1.6	-2	-1.2	0.2	3.5	7.7	11.8	14.9	17.1	17	14.6	10	6	1.1	87	69	68	67
Qpe	T-DE-001	4014	8	185.252	38	277	40.917	31.667	1200	2.1	3.8	8.1	12.7	17.1	20.7	22.8	23	20.4	14.9	10.3	4.2	-4.5	-3.4	-1.1	2.7	6.5	9.2	11.4	11.1	8.7	5	1.6	-2	-1.2	0.2	3.5	7.7	11.8	14.9	17.1	17	14.6	10	6	1.1	87	69	68	67
Qpe	T-DE-001	1003	8	186.664	90	31	52.8327	10.317	110	2	3.1	7.1	12.2	17.7	21	22.3	22	18.5	13	7	3.3	-3.1	-3	-0.8	2.4	6.3	9.6	11.7	11.2	8.5	5.2	1.8	-1.6	-0.6	0	3.1	7.3	12	15.3	17	16.6	13.5	9.1	4.4	0.8	53	42	47	50
Qpe	T-DE-001	2005	8	191.46	88	31	52.8327	10.317	110	2	3.1	7.1	12.2	17.7	21	22.3	22	18.5	13	7	3.3	-3.1	-3	-0.8	2.4	6.3	9.6	11.7	11.2	8.5	5.2	1.8	-1.6	-0.6	0	3.1	7.3	12	15.3	17	16.6	13.5	9.1	4.4	0.8	53	42	47	50
Qpe	T-DE-001	3012	8	243.551	90	31	52.8327	10.317	110	2	3.1	7.1	12.2	17.7	21	22.3	22	18.5	13	7	3.3	-3.1	-3	-0.8	2.4	6.3	9.6	11.7	11.2	8.5	5.2	1.8	-1.6	-0.6	0	3.1	7.3	12	15.3	17	16.6	13.5	9.1	4.4	0.8	53	42	47	50
Qpe	T-DE-001	1002	8	163.845	85	33	51.1827	17.9313	210	-0.2	1.5	6.7	13	18.2	21.7	22.8	22.6	18.6	13.6	6.9	2.1	-5.7	-4.5	-0.9	3	7.4	10.9	12	11.6	8.8	4.7	1	-3.1	-3	-1.5	2.9	8	12.8	16.3	17.4	17.1	13.7	9.1	4	-0.5	31	28	29	37
Qpe	T-DE-001	2007	8	174.785	82	33	51.1827	17.9313	210	-0.2	1.5	6.7	13	18.2	21.7	22.8	22.6	18.6	13.6	6.9	2.1	-5.7	-4.5	-0.9	3	7.4	10.9	12	11.6	8.8	4.7	1	-3.1	-3	-1.5	2.9	8	12.8	16.3	17.4	17.1	13.7	9.1	4	-0.5	31	28	29	37
Qpe	T-DE-001	3012	8	235.592	88	33	51.1827	17.9313	210	-0.2	1.5	6.7	13	18.2	21.7	22.8	22.6	18.6	13.6	6.9	2.1	-5.7	-4.5	-0.9	3	7.4	10.9	12	11.6	8.8	4.7	1	-3.1	-3	-1.5	2.9	8	12.8	16.3	17.4	17.1	13.7	9.1	4	-0.5	31	28	29	37
Qpe	T-DE-001	1004	8	203.511	89	41	56.1315	9.396	250	1.3	1.9	4.1	7.8	13.6	16.9	17.9	18.1	14.6	10.5	6	2.9	-6	-6	-2.9	1.3	6.1	9.4	11	10.2	7.8	4.5	-0.4	-0.8	-2.4	-2	0.6	4.6	9.8	13.1	14.5	14.1	11.2	7.5	2.8	1.1	61	42	47	47
Qpe	T-DE-001	2008	8	224.621	90	41	56.1315	9.396	250	1.3	1.9	4.1	7.8	13.6	16.9	17.9	18.1	14.6	10.5	6	2.9	-6	-6	-2.9	1.3	6.1	9.4	11	10.2	7.8	4.5	-0.4	-0.8	-2.4	-2	0.6	4.6	9.8	13.1	14.5	14.1	11.2	7.5	2.8	1.1	61	42	47	47
Qpe	T-DE-001	3011	8	141.794	87	41	56.1315	9.396	250	1.3	1.9	4.1	7.8	13.6	16.9	17.9	18.1	14.6	10.5	6	2.9	-6	-6	-2.9	1.3	6.1	9.4	11	10.2	7.8	4.5	-0.4	-0.8	-2.4	-2	0.6	4.6	9.8	13.1	14.5	14.1	11.2	7.5	2.8	1.1	61	42	47	47
Qpe	T-DE-001	1001	8	155.83	90	50	46.604	0.178	130	6.9	8.3	12.3	15.4	18.5	22.5	24.6	24.1	21.8	16.6	11	7.3	0.6	1.2	2.8	5.3	8	11.4	13.2	12.8	11.1	7.4	4.1	1.3	3.7	4.7	7.5	10.3	13.2	16.9	18.9	18.5	16.4	12	7.5	4.3	70	62	57	53
Qpe	T-DE-001	2007	8	132.807	81	50	46.604	0.178	130	6.9	8.3	12.3	15.4	18.5	22.5	24.6	24.1	21.8	16.6	11	7.3	0.6	1.2	2.8	5.3	8	11.4	13.2	12.8	11.1	7.4	4.1	1.3	3.7	4.7	7.5	10.3	13.2	16.9	18.9	18.5	16.4	12	7.5	4.3	70	62	57	53
Qpe	T-DE-001	3009	8	165.151	87	50	46.604	0.178	130	6.9	8.3	12.3	15.4	18.5	22.5	24.6	24.1	21.8	16.6	11	7.3	0.6	1.2	2.8	5.3	8	11.4	13.2	12.8	11.1	7.4	4.1	1.3	3.7	4.7	7.5	10.3	13.2	16.9	18.9	18.5	16.4	12	7.5	4.3	70	62	57	53
Qpe	T-DE-001	1003	8	186.166	88	61	51.769	7.174	75	3.9	5	8.3	12.8	17.4	20.5	21.9	21.5	18.9	14.4	7.9	4.9	-0.9	-0.6	1.6	4.1	7.9	10.8	12.5	12	9.7	6.8	2.8	0.2	1.5	2.2	5	8.5	12.7	15.7	17.2	16.7	14.3	10.6	5.4	2.5	71	49	64	55
Qpe	T-DE-001	2007	8	272.002	80	61	51.769	7.174	75	3.9	5	8.3	12.8	17.4	20.5	21.9	21.5	18.9	14.4	7.9	4.9	-0.9	-0.6	1.6	4.1	7.9	10.8	12.5	12	9.7	6.8	2.8	0.2	1.5	2.2	5	8.5	12.7	15.7	17.2	16.7	14.3	10.6	5.4	2.5	71	49	64	55
Qpe	T-DE-001	3011	8	251.876	90	61	51.769	7.174	75	3.9	5	8.3	12.8	17.4	20.5	21.9	21.5	18.9	14.4	7.9	4.9	-0.9	-0.6	1.6	4.1	7.9	10.8	12.5	12	9.7	6.8	2.8	0.2	1.5	2.2	5	8.5	12.7	15.7	17.2	16.7	14.3	10.6	5.4	2.5	71	49	64	55
Qpe	T-DE-001	1001	8	275.487	89	77	47.761	5.487	330	3.4	5.3	10	14.1	17.8	21.1	23.4	22.9	20.1	14.5	8.2	3.9	-1.8	-1.3	1.3	4.4	7.7	11.1	12.9	12.5	10.4	6.2	2	-0.9	0.8	2	5.6	9.2	12.7	16.1	18.1	17.7	15.3	10.4	5.1	1.5	83	71	72	56
Qpe	T-DE-001	2005	8	266.261	90	77	47.761	5.487	330	3.4	5.3	10	14.1	17.8	21.1	23.4	22.9	20.1	14.5	8.2	3.9	-1.8	-1.3	1.3	4.4	7.7	11.1	12.9	12.5	10.4	6.2	2	-0.9	0.8	2	5.6	9.2	12.7	16.1	18.1	17.7	15.3	10.4	5.1	1.5	83	71	72	56
Qpe	T-DE-001	3010	8	213.166	90	77	47.761	5.487	330	3.4	5.3	10	14.1	17.8	21.1	23.4	22.9	20.1	14.5	8.2	3.9	-1.8	-1.3	1.3	4.4	7.7	11.1	12.9	12.5	10.4	6.2	2	-0.9	0.8	2	5.6	9.2	12.7	16.1	18.1	17.7	15.3	10.4	5.1	1.5	83	71	72	56
Qpe	T-DE-001	1002	8	253.705	88	87	49.361	7.872	470	1.1	3.3	7.3	12	16.1	19.9	21.3	20.4	18.6	13	6.2	3	-3.8	-3.2	-0.9	2.4	5.9	9.4	10.9	10.5	8.2	4.6	0.4	-2.2	-1.4	0	3.2	7.2	11	14.6	16.1	15.4	13.4	8.8	3.3	0.4	63	54	51	52
Qpe	T-DE-001	1004	8	204.135	89	87	49.361	7.872	470	1.1	3.3	7.3	12	16.1	19.9	21.3	20.4	18.6	13	6.2	3	-3.8	-3.2	-0.9	2.4	5.9	9.4	10.9	10.5	8.2	4.6	0.4	-2.2	-1.4	0	3.2	7.2	11	14.6	16.1	15.4	13.4	8.8	3.3	0.4	63	54	51	52
Qpe	T-DE-001	2006	8	232.82	175	87	49.361	7.872	470	1.1	3.3	7.3	12	16.1	19.9	21.3	20.4	18.6	13	6.2	3	-3.8	-3.2	-0.9	2.4	5.9	9.4	10.9	10.5	8.2	4.6	0.4	-2.2	-1.4	0	3.2	7.2	11	14.6	16.1	15.4	13.4	8.8	3.3	0.4	63	54	51	52
Qpe	T-DE-001	3009	8	256.154	89	87	49.361	7.872	470	1.1	3.3	7.3	12	16.1	19.9	21.3	20.4	18.6	13	6.2	3	-3.8	-3.2	-0.9	2.4	5.9	9.4	10.9	10.5	8.2	4.6	0.4	-2.2	-1.4	0	3.2	7.2	11	14.6	16.1	15.4	13.4	8.8	3.3	0.4	63	54	51	52
Qpe	T-DE-001	3012	8	246.565	88	87	49.361	7.872	470	1.1	3.3	7.3	12	16.1	19.9	21.3	20.4	18.6	13	6.2	3	-3.8	-3.2	-0.9	2.4	5.9	9.4	10.9	10.5	8.2	4.6	0.4	-2.2	-1.4	0	3.2	7.2	11	14.6	16.1	15.4	13.4	8.8	3.3	0.4	63	54	51	52
Qpe	T-DE-002	1001	8	366.116	166	1	51.7942	-2.4895	90.6667	6.4	6.6	8.9	12.2	15.4	18.9	20.4	19.9	17.5	13.9	9.3	7.3	1.1	1	2	4.4	7.1	10.3	11.8	11.6	9.5	7.1	3.4	1.9	3.8	3.8	5.5	8.3	11.3	14.6	16.1	15.7	13.5	10.5	6.4	4.6	81	56	64	54
Qpe	T-DE-002	1002	8	395.837	138	1	51.7942	-2.4895	90.6667	6.4	6.6	8.9	12.2	15.4	18.9	20.4	19.9	17.5	13.9	9.3	7.3	1.1	1	2	4.4	7.1	10.3	11.8	11.6	9.5	7.1	3.4	1.9	3.8	3.8	5.5	8.3	11.3	14.6	16.1	15.7	13.5	10.5	6.4	4.6	81	56	64	54
Qpe	T-DE-002	2005	8	452.417	91	1	51.7942	-2.4895	90.6667	6.4	6.6	8.9	12.2	15.4	18.9	20.4	19.9	17.5	13.9	9.3	7.3	1.1	1	2	4.4	7.1	10.3	11.8	11.6	9.5	7.1	3.4	1.9	3.8	3.8	5.5	8.3	11.3	14.6	16.1	15.7	13.5	10.5	6.4	4.6	81	56	64	54
Qpe	T-DE-002	2006	8	333.273	55	1	51.7942	-2.4895	90.6667	6.4	6.6	8.9	12.2	15.4	18.9	20.4	19.9	17.5	13.9	9.3	7.3	1.1	1	2	4.4	7.1	10.3	11.8	11.6	9.5	7.1	3.4	1.9	3.8	3.8	5.5	8.3	11.3	14.6	16.1	15.7	13.5	10.5	6.4	4.6	81	56	64	54
Qpe	T-DE-002	2007	8	327.062	74	1	51.7942	-2.4895	90.6667	6.4	6.6	8.9	12.2	15.4	18.9	20.4	19.9	17.5	13.9	9.3	7.3	1.1	1	2	4.4	7.1	10.3	11.8	11.6	9.5	7.1	3.4	1.9	3.8	3.8	5.5	8.3	11.3	14.6	16.1	15.7	13.5	10.5	6.4	4.6	81	56	64	54
Qpe	T-DE-002	3009	8	484.36	109	1	51.7942	-2.4895	90.6667	6.4	6.6	8.9	12.2	15.4	18.9	20.4	19.9	17.5	13.9	9.3	7.3	1.1	1	2	4.4	7.1	10.3	11.8	11.6	9.5	7.1	3.4	1.9	3.8	3.8	5.5	8.3	11.3	14.6	16.1	15.7	13.5	10.5	6.4	4.6	81	56	64	54
Qpe	T-DE-002	3010	8	447.86	113	1	51.7942	-2.4895	90.6667	6.4	6.6	8.9	12.2	15.4	18.9	20.4	19.9	17.5	13.9	9.3	7.3	1.1	1	2	4.4	7.1	10.3	11.8	11.6	9.5	7.1	3.4	1.9	3.8	3.8	5.5	8.3	11.3	14.6	16.1	15.7	13.5	10.5	6.4	4.6	81	56	64	54
Qpe	T-DE-002	1001	8	326.614	54	21	46.4607	2.89067	270	6.1	7.8	12	15.1	18.5	22.2	24.7	24.1	21.7	16.3	10.3	6.4	-1	-0.3	1.4	4.2	7.3	10.6	12.3	12	10.2	6.1	2.8	-0.2	2.6	3.7	6.7	9.6	12.9	16.4	18.5	18.1	15.9	11.2	6.6	3.1	58	58	56	55
Qpe	T-DE-002	1004	8	469.799	43	21	46.4607	2.89067	270	6.1	7.8	12	15.1	18.5	22.2	24.7	24.1	21.7	16.3	10.3	6.4	-1	-0.3	1.4	4.2	7.3	10.6	12.3	12	10.2	6.1	2.8	-0.2	2.6	3.7	6.7	9.6	12.9	16.4	18.5	18.1	15.9	11.2	6.6	3.1	58	58	56	55
Qpe	T-DE-002	2006	8	335.638	67	21	46.4607	2.89067	270	6.1	7.8	12	15.1	18.5	22.2	24.7	24.1	21.7	16.3	10.3	6.4	-1	-0.3	1.4	4.2	7.3	10.6	12.3	12	10.2	6.1	2.8	-0.2	2.6	3.7	6.7	9.6	12.9	16.4	18.5	18.1	15.9	11.2	6.6	3.1	58	58	56	55
Qpe	T-DE-002	2007	8	299.961	58	21	46.4607	2.89067	270	6.1	7.8	12	15.1	18.5	22.2	24.7	24.1	21.7	16.3	10.3	6.4	-1	-0.3	1.4	4.2	7.3	10.6	12.3	12	10.2	6.1	2.8	-0.2	2.6	3.7	6.7	9.6	12.9	16.4	18.5	18.1	15.9	11.2	6.6	3.1	58	58	56	55
Qpe	T-DE-002	3012	8	393.287	136	21	46.4607	2.89067	270	6.1	7.8	12	15.1	18.5	22.2	24.7	24.1	21.7	16.3	10.3	6.4	-1	-0.3	1.4	4.2	7.3	10.6	12.3	12	10.2	6.1	2.8	-0.2	2.6	3.7	6.7	9.6	12.9	16.4	18.5	18.1	15.9	11.2	6.6	3.1	58	58	56	55
Qpe	T-DE-002	1002	8	351.164	75	26	51.948	-2.45	70	6.5	6.8	9.1	12.2	15.5	18.9	20.3	19.9	17.6	14.2	9.5	7.4	1.2	1.1	2.2	4.5	7.2	10.3	11.8	11.6	9.6	7.3	3.6	2.1	3.9	4	5.6	8.3	11.3	14.6	16.1	15.7	13.6	10.7	6.5	4.8	69	48	55	49
Qpe	T-DE-002	2007	8	352.829	37	26	51.948	-2.45	70	6.5	6.8	9.1	12.2	15.5	18.9	20.3	19.9	17.6	14.2	9.5	7.4	1.2	1.1	2.2	4.5	7.2	10.3	11.8	11.6	9.6	7.3	3.6	2.1	3.9	4	5.6	8.3	11.3	14.6	16.1	15.7	13.6	10.7	6.5	4.8	69	48	55	49
Qpe	T-DE-002	3011	8	385.482	56	26	51.948	-2.45	70	6.5	6.8	9.1	12.2	15.5	18.9	20.3	19.9	17.6	14.2	9.5	7.4	1.2	1.1	2.2	4.5	7.2	10.3	11.8	11.6	9.6	7.3	3.6	2.1	3.9	4	5.6	8.3	11.3	14.6	16.1	15.7	13.6	10.7	6.5	4.8	69	48	55	49
Qpe	T-DE-002	1001	8	241.191	50	260	56.071	9.597	25	2.7	3.3	5.4	9.2	14.7	18	19.3	19.1	15.9	11.6	7.3	4.3	-5.4	-5.4	-2	2.8	7.6	11	12.9	11.7	9.3	5.6	1.1	0.2	-1.3	-1	1.7	6	11.1	14.5	16.1	15.4	12.6	8.6	4.2	2.2	59	41	47	43
Qpe	T-DE-002	1003	8	336.232	42	260	56.071	9.597	25	2.7	3.3	5.4	9.2	14.7	18	19.3	19.1	15.9	11.6	7.3	4.3	-5.4	-5.4	-2	2.8	7.6	11	12.9	11.7	9.3	5.6	1.1	0.2	-1.3	-1	1.7	6	11.1	14.5	16.1	15.4	12.6	8.6	4.2	2.2	59	41	47	43
Qpe	T-DE-002	2006	8	272.998	62	260	56.071	9.597	25	2.7	3.3	5.4	9.2	14.7	18	19.3	19.1	15.9	11.6	7.3	4.3	-5.4	-5.4	-2	2.8	7.6	11	12.9	11.7	9.3	5.6	1.1	0.2	-1.3	-1	1.7	6	11.1	14.5	16.1	15.4	12.6	8.6	4.2	2.2	59	41	47	43
Qpe	T-DE-002	2008	8	327.346	46	260	56.071	9.597	25	2.7	3.3	5.4	9.2	14.7	18	19.3	19.1	15.9	11.6	7.3	4.3	-5.4	-5.4	-2	2.8	7.6	11	12.9	11.7	9.3	5.6	1.1	0.2	-1.3	-1	1.7	6	11.1	14.5	16.1	15.4	12.6	8.6	4.2	2.2	59	41	47	43
Qpe	T-DE-002	3011	8	313.041	109	260	56.071	9.597	25	2.7	3.3	5.4	9.2	14.7	18	19.3	19.1	15.9	11.6	7.3	4.3	-5.4	-5.4	-2	2.8	7.6	11	12.9	11.7	9.3	5.6	1.1	0.2	-1.3	-1	1.7	6	11.1	14.5	16.1	15.4	12.6	8.6	4.2	2.2	59	41	47	43
Qpe	T-DE-002	1003	8	344.917	73	31	52.8327	10.317	110	2	3.1	7.1	12.2	17.7	21	22.3	22	18.5	13	7	3.3	-3.1	-3	-0.8	2.4	6.3	9.6	11.7	11.2	8.5	5.2	1.8	-1.6	-0.6	0	3.1	7.3	12	15.3	17	16.6	13.5	9.1	4.4	0.8	53	42	47	50
Qpe	T-DE-002	2007	8	349.023	41	31	52.8327	10.317	110	2	3.1	7.1	12.2	17.7	21	22.3	22	18.5	13	7	3.3	-3.1	-3	-0.8	2.4	6.3	9.6	11.7	11.2	8.5	5.2	1.8	-1.6	-0.6	0	3.1	7.3	12	15.3	17	16.6	13.5	9.1	4.4	0.8	53	42	47	50
Qpe	T-DE-002	3010	8	367.542	77	31	52.8327	10.317	110	2	3.1	7.1	12.2	17.7	21	22.3	22	18.5	13	7	3.3	-3.1	-3	-0.8	2.4	6.3	9.6	11.7	11.2	8.5	5.2	1.8	-1.6	-0.6	0	3.1	7.3	12	15.3	17	16.6	13.5	9.1	4.4	0.8	53	42	47	50
Qpe	T-DE-002	1004	8	243.978	61	4	47.8091	0.390286	156.75	6.2	7.6	11.4	14.8	18.1	21.9	24.1	23.6	20.9	15.8	10.1	6.5	0.1	0.6	2.2	4.7	7.6	10.8	12.6	12.3	10.3	6.8	3.5	0.9	3.1	4.1	6.8	9.8	12.8	16.3	18.3	17.9	15.6	11.3	6.8	3.7	68	61	57	53
Qpe	T-DE-002	2006	8	283.807	37	4	47.8091	0.390286	156.75	6.2	7.6	11.4	14.8	18.1	21.9	24.1	23.6	20.9	15.8	10.1	6.5	0.1	0.6	2.2	4.7	7.6	10.8	12.6	12.3	10.3	6.8	3.5	0.9	3.1	4.1	6.8	9.8	12.8	16.3	18.3	17.9	15.6	11.3	6.8	3.7	68	61	57	53
Qpe	T-DE-002	3009	8	325.26	36	4	47.8091	0.390286	156.75	6.2	7.6	11.4	14.8	18.1	21.9	24.1	23.6	20.9	15.8	10.1	6.5	0.1	0.6	2.2	4.7	7.6	10.8	12.6	12.3	10.3	6.8	3.5	0.9	3.1	4.1	6.8	9.8	12.8	16.3	18.3	17.9	15.6	11.3	6.8	3.7	68	61	57	53
Qpe	T-DE-002	1003	8	273.22	56	41	56.1315	9.396	250	1.3	1.9	4.1	7.8	13.6	16.9	17.9	18.1	14.6	10.5	6	2.9	-6	-6	-2.9	1.3	6.1	9.4	11	10.2	7.8	4.5	-0.4	-0.8	-2.4	-2	0.6	4.6	9.8	13.1	14.5	14.1	11.2	7.5	2.8	1.1	61	42	47	47
Qpe	T-DE-002	2008	8	329.527	46	41	56.1315	9.396	250	1.3	1.9	4.1	7.8	13.6	16.9	17.9	18.1	14.6	10.5	6	2.9	-6	-6	-2.9	1.3	6.1	9.4	11	10.2	7.8	4.5	-0.4	-0.8	-2.4	-2	0.6	4.6	9.8	13.1	14.5	14.1	11.2	7.5	2.8	1.1	61	42	47	47
Qpe	T-DE-002	3009	8	293.643	50	41	56.1315	9.396	250	1.3	1.9	4.1	7.8	13.6	16.9	17.9	18.1	14.6	10.5	6	2.9	-6	-6	-2.9	1.3	6.1	9.4	11	10.2	7.8	4.5	-0.4	-0.8	-2.4	-2	0.6	4.6	9.8	13.1	14.5	14.1	11.2	7.5	2.8	1.1	61	42	47	47
Qpe	T-DE-002	1002	8	206.944	63	50	46.604	0.178	130	6.9	8.3	12.3	15.4	18.5	22.5	24.6	24.1	21.8	16.6	11	7.3	0.6	1.2	2.8	5.3	8	11.4	13.2	12.8	11.1	7.4	4.1	1.3	3.7	4.7	7.5	10.3	13.2	16.9	18.9	18.5	16.4	12	7.5	4.3	70	62	57	53
Qpe	T-DE-002	2008	8	223.649	51	50	46.604	0.178	130	6.9	8.3	12.3	15.4	18.5	22.5	24.6	24.1	21.8	16.6	11	7.3	0.6	1.2	2.8	5.3	8	11.4	13.2	12.8	11.1	7.4	4.1	1.3	3.7	4.7	7.5	10.3	13.2	16.9	18.9	18.5	16.4	12	7.5	4.3	70	62	57	53
Qpe	T-DE-002	3012	8	228.225	69	50	46.604	0.178	130	6.9	8.3	12.3	15.4	18.5	22.5	24.6	24.1	21.8	16.6	11	7.3	0.6	1.2	2.8	5.3	8	11.4	13.2	12.8	11.1	7.4	4.1	1.3	3.7	4.7	7.5	10.3	13.2	16.9	18.9	18.5	16.4	12	7.5	4.3	70	62	57	53
Qpe	T-DE-002	1004	8	399.93	66	61	51.769	7.174	75	3.9	5	8.3	12.8	17.4	20.5	21.9	21.5	18.9	14.4	7.9	4.9	-0.9	-0.6	1.6	4.1	7.9	10.8	12.5	12	9.7	6.8	2.8	0.2	1.5	2.2	5	8.5	12.7	15.7	17.2	16.7	14.3	10.6	5.4	2.5	71	49	64	55
Qpe	T-DE-002	2008	8	400.754	48	61	51.769	7.174	75	3.9	5	8.3	12.8	17.4	20.5	21.9	21.5	18.9	14.4	7.9	4.9	-0.9	-0.6	1.6	4.1	7.9	10.8	12.5	12	9.7	6.8	2.8	0.2	1.5	2.2	5	8.5	12.7	15.7	17.2	16.7	14.3	10.6	5.4	2.5	71	49	64	55
Qpe	T-DE-002	3010	8	392.894	60	61	51.769	7.174	75	3.9	5	8.3	12.8	17.4	20.5	21.9	21.5	18.9	14.4	7.9	4.9	-0.9	-0.6	1.6	4.1	7.9	10.8	12.5	12	9.7	6.8	2.8	0.2	1.5	2.2	5	8.5	12.7	15.7	17.2	16.7	14.3	10.6	5.4	2.5	71	49	64	55
Qpe	T-DE-002	1004	8	406.796	63	77	47.761	5.487	330	3.4	5.3	10	14.1	17.8	21.1	23.4	22.9	20.1	14.5	8.2	3.9	-1.8	-1.3	1.3	4.4	7.7	11.1	12.9	12.5	10.4	6.2	2	-0.9	0.8	2	5.6	9.2	12.7	16.1	18.1	17.7	15.3	10.4	5.1	1.5	83	71	72	56
Qpe	T-DE-002	2005	8	380.774	56	77	47.761	5.487	330	3.4	5.3	10	14.1	17.8	21.1	23.4	22.9	20.1	14.5	8.2	3.9	-1.8	-1.3	1.3	4.4	7.7	11.1	12.9	12.5	10.4	6.2	2	-0.9	0.8	2	5.6	9.2	12.7	16.1	18.1	17.7	15.3	10.4	5.1	1.5	83	71	72	56
Qpe	T-DE-002	3011	8	456.403	27	77	47.761	5.487	330	3.4	5.3	10	14.1	17.8	21.1	23.4	22.9	20.1	14.5	8.2	3.9	-1.8	-1.3	1.3	4.4	7.7	11.1	12.9	12.5	10.4	6.2	2	-0.9	0.8	2	5.6	9.2	12.7	16.1	18.1	17.7	15.3	10.4	5.1	1.5	83	71	72	56
Qpe	T-DE-002	1003	8	387.767	81	87	49.361	7.872	470	1.1	3.3	7.3	12	16.1	19.9	21.3	20.4	18.6	13	6.2	3	-3.8	-3.2	-0.9	2.4	5.9	9.4	10.9	10.5	8.2	4.6	0.4	-2.2	-1.4	0	3.2	7.2	11	14.6	16.1	15.4	13.4	8.8	3.3	0.4	63	54	51	52
Qpe	T-DE-002	2005	8	426.459	66	87	49.361	7.872	470	1.1	3.3	7.3	12	16.1	19.9	21.3	20.4	18.6	13	6.2	3	-3.8	-3.2	-0.9	2.4	5.9	9.4	10.9	10.5	8.2	4.6	0.4	-2.2	-1.4	0	3.2	7.2	11	14.6	16.1	15.4	13.4	8.8	3.3	0.4	63	54	51	52
Qpe	T-DE-002	3012	8	418.907	73	87	49.361	7.872	470	1.1	3.3	7.3	12	16.1	19.9	21.3	20.4	18.6	13	6.2	3	-3.8	-3.2	-0.9	2.4	5.9	9.4	10.9	10.5	8.2	4.6	0.4	-2.2	-1.4	0	3.2	7.2	11	14.6	16.1	15.4	13.4	8.8	3.3	0.4	63	54	51	52
Qpe	T-DE-102	1	8	506.422	119	1	51.7942	-2.4895	90.6667	6.4	6.6	8.9	12.2	15.4	18.9	20.4	19.9	17.5	13.9	9.3	7.3	1.1	1	2	4.4	7.1	10.3	11.8	11.6	9.5	7.1	3.4	1.9	3.8	3.8	5.5	8.3	11.3	14.6	16.1	15.7	13.5	10.5	6.4	4.6	81	56	64	54
Qpe	T-DE-102	2	8	600.58	120	1	51.7942	-2.4895	90.6667	6.4	6.6	8.9	12.2	15.4	18.9	20.4	19.9	17.5	13.9	9.3	7.3	1.1	1	2	4.4	7.1	10.3	11.8	11.6	9.5	7.1	3.4	1.9	3.8	3.8	5.5	8.3	11.3	14.6	16.1	15.7	13.5	10.5	6.4	4.6	81	56	64	54
Qpe	T-DE-102	3	8	581.956	114	1	51.7942	-2.4895	90.6667	6.4	6.6	8.9	12.2	15.4	18.9	20.4	19.9	17.5	13.9	9.3	7.3	1.1	1	2	4.4	7.1	10.3	11.8	11.6	9.5	7.1	3.4	1.9	3.8	3.8	5.5	8.3	11.3	14.6	16.1	15.7	13.5	10.5	6.4	4.6	81	56	64	54
Qpe	T-DE-102	1	8	529.92	42	21	46.4607	2.89067	270	6.1	7.8	12	15.1	18.5	22.2	24.7	24.1	21.7	16.3	10.3	6.4	-1	-0.3	1.4	4.2	7.3	10.6	12.3	12	10.2	6.1	2.8	-0.2	2.6	3.7	6.7	9.6	12.9	16.4	18.5	18.1	15.9	11.2	6.6	3.1	58	58	56	55
Qpe	T-DE-102	2	8	403.899	58	21	46.4607	2.89067	270	6.1	7.8	12	15.1	18.5	22.2	24.7	24.1	21.7	16.3	10.3	6.4	-1	-0.3	1.4	4.2	7.3	10.6	12.3	12	10.2	6.1	2.8	-0.2	2.6	3.7	6.7	9.6	12.9	16.4	18.5	18.1	15.9	11.2	6.6	3.1	58	58	56	55
Qpe	T-DE-102	3	8	456.236	49	21	46.4607	2.89067	270	6.1	7.8	12	15.1	18.5	22.2	24.7	24.1	21.7	16.3	10.3	6.4	-1	-0.3	1.4	4.2	7.3	10.6	12.3	12	10.2	6.1	2.8	-0.2	2.6	3.7	6.7	9.6	12.9	16.4	18.5	18.1	15.9	11.2	6.6	3.1	58	58	56	55
Qpe	T-DE-102	1	8	508.832	61	26	51.948	-2.45	70	6.5	6.8	9.1	12.2	15.5	18.9	20.3	19.9	17.6	14.2	9.5	7.4	1.2	1.1	2.2	4.5	7.2	10.3	11.8	11.6	9.6	7.3	3.6	2.1	3.9	4	5.6	8.3	11.3	14.6	16.1	15.7	13.6	10.7	6.5	4.8	69	48	55	49
Qpe	T-DE-102	2	8	495.352	54	26	51.948	-2.45	70	6.5	6.8	9.1	12.2	15.5	18.9	20.3	19.9	17.6	14.2	9.5	7.4	1.2	1.1	2.2	4.5	7.2	10.3	11.8	11.6	9.6	7.3	3.6	2.1	3.9	4	5.6	8.3	11.3	14.6	16.1	15.7	13.6	10.7	6.5	4.8	69	48	55	49
Qpe	T-DE-102	3	8	535.929	53	26	51.948	-2.45	70	6.5	6.8	9.1	12.2	15.5	18.9	20.3	19.9	17.6	14.2	9.5	7.4	1.2	1.1	2.2	4.5	7.2	10.3	11.8	11.6	9.6	7.3	3.6	2.1	3.9	4	5.6	8.3	11.3	14.6	16.1	15.7	13.6	10.7	6.5	4.8	69	48	55	49
Qpe	T-DE-102	1	8	455.898	55	260	56.071	9.597	25	2.7	3.3	5.4	9.2	14.7	18	19.3	19.1	15.9	11.6	7.3	4.3	-5.4	-5.4	-2	2.8	7.6	11	12.9	11.7	9.3	5.6	1.1	0.2	-1.3	-1	1.7	6	11.1	14.5	16.1	15.4	12.6	8.6	4.2	2.2	59	41	47	43
Qpe	T-DE-102	2	8	456.442	59	260	56.071	9.597	25	2.7	3.3	5.4	9.2	14.7	18	19.3	19.1	15.9	11.6	7.3	4.3	-5.4	-5.4	-2	2.8	7.6	11	12.9	11.7	9.3	5.6	1.1	0.2	-1.3	-1	1.7	6	11.1	14.5	16.1	15.4	12.6	8.6	4.2	2.2	59	41	47	43
Qpe	T-DE-102	3	8	485.375	46	260	56.071	9.597	25	2.7	3.3	5.4	9.2	14.7	18	19.3	19.1	15.9	11.6	7.3	4.3	-5.4	-5.4	-2	2.8	7.6	11	12.9	11.7	9.3	5.6	1.1	0.2	-1.3	-1	1.7	6	11.1	14.5	16.1	15.4	12.6	8.6	4.2	2.2	59	41	47	43
Qpe	T-DE-102	1	8	493.077	57	263	53.707	9.762	10	2	3.1	6.7	11.8	17	20.3	21.5	21.4	18.6	13	7.3	3.7	-2.6	-2.5	-0.3	2.7	6.6	9.9	11.9	11.5	9	5.8	2.3	-0.8	-0.3	0.3	3.2	7.3	11.8	15.1	16.7	16.4	13.8	9.4	4.8	1.5	62	44	52	47
Qpe	T-DE-102	2	8	513.255	59	263	53.707	9.762	10	2	3.1	6.7	11.8	17	20.3	21.5	21.4	18.6	13	7.3	3.7	-2.6	-2.5	-0.3	2.7	6.6	9.9	11.9	11.5	9	5.8	2.3	-0.8	-0.3	0.3	3.2	7.3	11.8	15.1	16.7	16.4	13.8	9.4	4.8	1.5	62	44	52	47
Qpe	T-DE-102	3	8	538.909	59	263	53.707	9.762	10	2	3.1	6.7	11.8	17	20.3	21.5	21.4	18.6	13	7.3	3.7	-2.6	-2.5	-0.3	2.7	6.6	9.9	11.9	11.5	9	5.8	2.3	-0.8	-0.3	0.3	3.2	7.3	11.8	15.1	16.7	16.4	13.8	9.4	4.8	1.5	62	44	52	47
Qpe	T-DE-102	1	8	508.729	61	31	52.8327	10.317	110	2	3.1	7.1	12.2	17.7	21	22.3	22	18.5	13	7	3.3	-3.1	-3	-0.8	2.4	6.3	9.6	11.7	11.2	8.5	5.2	1.8	-1.6	-0.6	0	3.1	7.3	12	15.3	17	16.6	13.5	9.1	4.4	0.8	53	42	47	50
Qpe	T-DE-102	2	8	463.729	58	31	52.8327	10.317	110	2	3.1	7.1	12.2	17.7	21	22.3	22	18.5	13	7	3.3	-3.1	-3	-0.8	2.4	6.3	9.6	11.7	11.2	8.5	5.2	1.8	-1.6	-0.6	0	3.1	7.3	12	15.3	17	16.6	13.5	9.1	4.4	0.8	53	42	47	50
Qpe	T-DE-102	3	8	470.651	44	31	52.8327	10.317	110	2	3.1	7.1	12.2	17.7	21	22.3	22	18.5	13	7	3.3	-3.1	-3	-0.8	2.4	6.3	9.6	11.7	11.2	8.5	5.2	1.8	-1.6	-0.6	0	3.1	7.3	12	15.3	17	16.6	13.5	9.1	4.4	0.8	53	42	47	50
Qpe	T-DE-102	1	8	478.3	60	33	51.1827	17.9313	210	-0.2	1.5	6.7	13	18.2	21.7	22.8	22.6	18.6	13.6	6.9	2.1	-5.7	-4.5	-0.9	3	7.4	10.9	12	11.6	8.8	4.7	1	-3.1	-3	-1.5	2.9	8	12.8	16.3	17.4	17.1	13.7	9.1	4	-0.5	31	28	29	37
Qpe	T-DE-102	2	8	445.245	60	33	51.1827	17.9313	210	-0.2	1.5	6.7	13	18.2	21.7	22.8	22.6	18.6	13.6	6.9	2.1	-5.7	-4.5	-0.9	3	7.4	10.9	12	11.6	8.8	4.7	1	-3.1	-3	-1.5	2.9	8	12.8	16.3	17.4	17.1	13.7	9.1	4	-0.5	31	28	29	37
Qpe	T-DE-102	3	8	435.894	51	33	51.1827	17.9313	210	-0.2	1.5	6.7	13	18.2	21.7	22.8	22.6	18.6	13.6	6.9	2.1	-5.7	-4.5	-0.9	3	7.4	10.9	12	11.6	8.8	4.7	1	-3.1	-3	-1.5	2.9	8	12.8	16.3	17.4	17.1	13.7	9.1	4	-0.5	31	28	29	37
Qpe	T-DE-102	1	8	481.73	50	41	56.1315	9.396	250	1.3	1.9	4.1	7.8	13.6	16.9	17.9	18.1	14.6	10.5	6	2.9	-6	-6	-2.9	1.3	6.1	9.4	11	10.2	7.8	4.5	-0.4	-0.8	-2.4	-2	0.6	4.6	9.8	13.1	14.5	14.1	11.2	7.5	2.8	1.1	61	42	47	47
Qpe	T-DE-102	2	8	461.628	57	41	56.1315	9.396	250	1.3	1.9	4.1	7.8	13.6	16.9	17.9	18.1	14.6	10.5	6	2.9	-6	-6	-2.9	1.3	6.1	9.4	11	10.2	7.8	4.5	-0.4	-0.8	-2.4	-2	0.6	4.6	9.8	13.1	14.5	14.1	11.2	7.5	2.8	1.1	61	42	47	47
Qpe	T-DE-102	3	8	472.191	49	41	56.1315	9.396	250	1.3	1.9	4.1	7.8	13.6	16.9	17.9	18.1	14.6	10.5	6	2.9	-6	-6	-2.9	1.3	6.1	9.4	11	10.2	7.8	4.5	-0.4	-0.8	-2.4	-2	0.6	4.6	9.8	13.1	14.5	14.1	11.2	7.5	2.8	1.1	61	42	47	47
Qpe	T-DE-102	1	8	488.001	56	61	51.769	7.174	75	3.9	5	8.3	12.8	17.4	20.5	21.9	21.5	18.9	14.4	7.9	4.9	-0.9	-0.6	1.6	4.1	7.9	10.8	12.5	12	9.7	6.8	2.8	0.2	1.5	2.2	5	8.5	12.7	15.7	17.2	16.7	14.3	10.6	5.4	2.5	71	49	64	55
Qpe	T-DE-102	2	8	478.602	61	61	51.769	7.174	75	3.9	5	8.3	12.8	17.4	20.5	21.9	21.5	18.9	14.4	7.9	4.9	-0.9	-0.6	1.6	4.1	7.9	10.8	12.5	12	9.7	6.8	2.8	0.2	1.5	2.2	5	8.5	12.7	15.7	17.2	16.7	14.3	10.6	5.4	2.5	71	49	64	55
Qpe	T-DE-102	3	8	570.917	53	61	51.769	7.174	75	3.9	5	8.3	12.8	17.4	20.5	21.9	21.5	18.9	14.4	7.9	4.9	-0.9	-0.6	1.6	4.1	7.9	10.8	12.5	12	9.7	6.8	2.8	0.2	1.5	2.2	5	8.5	12.7	15.7	17.2	16.7	14.3	10.6	5.4	2.5	71	49	64	55
Qpe	T-DE-102	1	8	479.785	46	87	49.361	7.872	470	1.1	3.3	7.3	12	16.1	19.9	21.3	20.4	18.6	13	6.2	3	-3.8	-3.2	-0.9	2.4	5.9	9.4	10.9	10.5	8.2	4.6	0.4	-2.2	-1.4	0	3.2	7.2	11	14.6	16.1	15.4	13.4	8.8	3.3	0.4	63	54	51	52
Qpe	T-DE-102	2	8	534.541	55	87	49.361	7.872	470	1.1	3.3	7.3	12	16.1	19.9	21.3	20.4	18.6	13	6.2	3	-3.8	-3.2	-0.9	2.4	5.9	9.4	10.9	10.5	8.2	4.6	0.4	-2.2	-1.4	0	3.2	7.2	11	14.6	16.1	15.4	13.4	8.8	3.3	0.4	63	54	51	52
Qpe	T-DE-102	3	8	558.928	56	87	49.361	7.872	470	1.1	3.3	7.3	12	16.1	19.9	21.3	20.4	18.6	13	6.2	3	-3.8	-3.2	-0.9	2.4	5.9	9.4	10.9	10.5	8.2	4.6	0.4	-2.2	-1.4	0	3.2	7.2	11	14.6	16.1	15.4	13.4	8.8	3.3	0.4	63	54	51	52
Qpe	T-DE-103	1	8	348.887	117	1	51.7942	-2.4895	90.6667	6.4	6.6	8.9	12.2	15.4	18.9	20.4	19.9	17.5	13.9	9.3	7.3	1.1	1	2	4.4	7.1	10.3	11.8	11.6	9.5	7.1	3.4	1.9	3.8	3.8	5.5	8.3	11.3	14.6	16.1	15.7	13.5	10.5	6.4	4.6	81	56	64	54
Qpe	T-DE-103	2	8	380.758	121	1	51.7942	-2.4895	90.6667	6.4	6.6	8.9	12.2	15.4	18.9	20.4	19.9	17.5	13.9	9.3	7.3	1.1	1	2	4.4	7.1	10.3	11.8	11.6	9.5	7.1	3.4	1.9	3.8	3.8	5.5	8.3	11.3	14.6	16.1	15.7	13.5	10.5	6.4	4.6	81	56	64	54
Qpe	T-DE-103	3	8	352.747	121	1	51.7942	-2.4895	90.6667	6.4	6.6	8.9	12.2	15.4	18.9	20.4	19.9	17.5	13.9	9.3	7.3	1.1	1	2	4.4	7.1	10.3	11.8	11.6	9.5	7.1	3.4	1.9	3.8	3.8	5.5	8.3	11.3	14.6	16.1	15.7	13.5	10.5	6.4	4.6	81	56	64	54
Qpe	T-DE-103	4	8	253.955	114	1	51.7942	-2.4895	90.6667	6.4	6.6	8.9	12.2	15.4	18.9	20.4	19.9	17.5	13.9	9.3	7.3	1.1	1	2	4.4	7.1	10.3	11.8	11.6	9.5	7.1	3.4	1.9	3.8	3.8	5.5	8.3	11.3	14.6	16.1	15.7	13.5	10.5	6.4	4.6	81	56	64	54
Qpe	T-DE-103	2	8	306.247	60	21	46.4607	2.89067	270	6.1	7.8	12	15.1	18.5	22.2	24.7	24.1	21.7	16.3	10.3	6.4	-1	-0.3	1.4	4.2	7.3	10.6	12.3	12	10.2	6.1	2.8	-0.2	2.6	3.7	6.7	9.6	12.9	16.4	18.5	18.1	15.9	11.2	6.6	3.1	58	58	56	55
Qpe	T-DE-103	1	8	318.523	45	26	51.948	-2.45	70	6.5	6.8	9.1	12.2	15.5	18.9	20.3	19.9	17.6	14.2	9.5	7.4	1.2	1.1	2.2	4.5	7.2	10.3	11.8	11.6	9.6	7.3	3.6	2.1	3.9	4	5.6	8.3	11.3	14.6	16.1	15.7	13.6	10.7	6.5	4.8	69	48	55	49
Qpe	T-DE-103	2	8	350.131	57	26	51.948	-2.45	70	6.5	6.8	9.1	12.2	15.5	18.9	20.3	19.9	17.6	14.2	9.5	7.4	1.2	1.1	2.2	4.5	7.2	10.3	11.8	11.6	9.6	7.3	3.6	2.1	3.9	4	5.6	8.3	11.3	14.6	16.1	15.7	13.6	10.7	6.5	4.8	69	48	55	49
Qpe	T-DE-103	3	8	306.621	57	26	51.948	-2.45	70	6.5	6.8	9.1	12.2	15.5	18.9	20.3	19.9	17.6	14.2	9.5	7.4	1.2	1.1	2.2	4.5	7.2	10.3	11.8	11.6	9.6	7.3	3.6	2.1	3.9	4	5.6	8.3	11.3	14.6	16.1	15.7	13.6	10.7	6.5	4.8	69	48	55	49
Qpe	T-DE-103	4	8	266.964	56	26	51.948	-2.45	70	6.5	6.8	9.1	12.2	15.5	18.9	20.3	19.9	17.6	14.2	9.5	7.4	1.2	1.1	2.2	4.5	7.2	10.3	11.8	11.6	9.6	7.3	3.6	2.1	3.9	4	5.6	8.3	11.3	14.6	16.1	15.7	13.6	10.7	6.5	4.8	69	48	55	49
Qpe	T-DE-103	1	8	300.19	62	260	56.071	9.597	25	2.7	3.3	5.4	9.2	14.7	18	19.3	19.1	15.9	11.6	7.3	4.3	-5.4	-5.4	-2	2.8	7.6	11	12.9	11.7	9.3	5.6	1.1	0.2	-1.3	-1	1.7	6	11.1	14.5	16.1	15.4	12.6	8.6	4.2	2.2	59	41	47	43
Qpe	T-DE-103	2	8	323.791	60	260	56.071	9.597	25	2.7	3.3	5.4	9.2	14.7	18	19.3	19.1	15.9	11.6	7.3	4.3	-5.4	-5.4	-2	2.8	7.6	11	12.9	11.7	9.3	5.6	1.1	0.2	-1.3	-1	1.7	6	11.1	14.5	16.1	15.4	12.6	8.6	4.2	2.2	59	41	47	43
Qpe	T-DE-103	3	8	303.382	55	260	56.071	9.597	25	2.7	3.3	5.4	9.2	14.7	18	19.3	19.1	15.9	11.6	7.3	4.3	-5.4	-5.4	-2	2.8	7.6	11	12.9	11.7	9.3	5.6	1.1	0.2	-1.3	-1	1.7	6	11.1	14.5	16.1	15.4	12.6	8.6	4.2	2.2	59	41	47	43
Qpe	T-DE-103	4	8	248.902	60	260	56.071	9.597	25	2.7	3.3	5.4	9.2	14.7	18	19.3	19.1	15.9	11.6	7.3	4.3	-5.4	-5.4	-2	2.8	7.6	11	12.9	11.7	9.3	5.6	1.1	0.2	-1.3	-1	1.7	6	11.1	14.5	16.1	15.4	12.6	8.6	4.2	2.2	59	41	47	43
Qpe	T-DE-103	1	8	316.65	53	263	53.707	9.762	10	2	3.1	6.7	11.8	17	20.3	21.5	21.4	18.6	13	7.3	3.7	-2.6	-2.5	-0.3	2.7	6.6	9.9	11.9	11.5	9	5.8	2.3	-0.8	-0.3	0.3	3.2	7.3	11.8	15.1	16.7	16.4	13.8	9.4	4.8	1.5	62	44	52	47
Qpe	T-DE-103	2	8	301.818	59	263	53.707	9.762	10	2	3.1	6.7	11.8	17	20.3	21.5	21.4	18.6	13	7.3	3.7	-2.6	-2.5	-0.3	2.7	6.6	9.9	11.9	11.5	9	5.8	2.3	-0.8	-0.3	0.3	3.2	7.3	11.8	15.1	16.7	16.4	13.8	9.4	4.8	1.5	62	44	52	47
Qpe	T-DE-103	3	8	272.346	59	263	53.707	9.762	10	2	3.1	6.7	11.8	17	20.3	21.5	21.4	18.6	13	7.3	3.7	-2.6	-2.5	-0.3	2.7	6.6	9.9	11.9	11.5	9	5.8	2.3	-0.8	-0.3	0.3	3.2	7.3	11.8	15.1	16.7	16.4	13.8	9.4	4.8	1.5	62	44	52	47
Qpe	T-DE-103	4	8	229.102	58	263	53.707	9.762	10	2	3.1	6.7	11.8	17	20.3	21.5	21.4	18.6	13	7.3	3.7	-2.6	-2.5	-0.3	2.7	6.6	9.9	11.9	11.5	9	5.8	2.3	-0.8	-0.3	0.3	3.2	7.3	11.8	15.1	16.7	16.4	13.8	9.4	4.8	1.5	62	44	52	47
Qpe	T-DE-103	1	8	322.606	56	31	52.8327	10.317	110	2	3.1	7.1	12.2	17.7	21	22.3	22	18.5	13	7	3.3	-3.1	-3	-0.8	2.4	6.3	9.6	11.7	11.2	8.5	5.2	1.8	-1.6	-0.6	0	3.1	7.3	12	15.3	17	16.6	13.5	9.1	4.4	0.8	53	42	47	50
Qpe	T-DE-103	2	8	293.811	48	31	52.8327	10.317	110	2	3.1	7.1	12.2	17.7	21	22.3	22	18.5	13	7	3.3	-3.1	-3	-0.8	2.4	6.3	9.6	11.7	11.2	8.5	5.2	1.8	-1.6	-0.6	0	3.1	7.3	12	15.3	17	16.6	13.5	9.1	4.4	0.8	53	42	47	50
Qpe	T-DE-103	3	8	308.239	61	31	52.8327	10.317	110	2	3.1	7.1	12.2	17.7	21	22.3	22	18.5	13	7	3.3	-3.1	-3	-0.8	2.4	6.3	9.6	11.7	11.2	8.5	5.2	1.8	-1.6	-0.6	0	3.1	7.3	12	15.3	17	16.6	13.5	9.1	4.4	0.8	53	42	47	50
Qpe	T-DE-103	4	8	273.882	54	31	52.8327	10.317	110	2	3.1	7.1	12.2	17.7	21	22.3	22	18.5	13	7	3.3	-3.1	-3	-0.8	2.4	6.3	9.6	11.7	11.2	8.5	5.2	1.8	-1.6	-0.6	0	3.1	7.3	12	15.3	17	16.6	13.5	9.1	4.4	0.8	53	42	47	50
Qpe	T-DE-103	1	8	341.188	54	33	51.1827	17.9313	210	-0.2	1.5	6.7	13	18.2	21.7	22.8	22.6	18.6	13.6	6.9	2.1	-5.7	-4.5	-0.9	3	7.4	10.9	12	11.6	8.8	4.7	1	-3.1	-3	-1.5	2.9	8	12.8	16.3	17.4	17.1	13.7	9.1	4	-0.5	31	28	29	37
Qpe	T-DE-103	2	8	360.217	62	33	51.1827	17.9313	210	-0.2	1.5	6.7	13	18.2	21.7	22.8	22.6	18.6	13.6	6.9	2.1	-5.7	-4.5	-0.9	3	7.4	10.9	12	11.6	8.8	4.7	1	-3.1	-3	-1.5	2.9	8	12.8	16.3	17.4	17.1	13.7	9.1	4	-0.5	31	28	29	37
Qpe	T-DE-103	1	8	269.226	55	4	47.8091	0.390286	156.75	6.2	7.6	11.4	14.8	18.1	21.9	24.1	23.6	20.9	15.8	10.1	6.5	0.1	0.6	2.2	4.7	7.6	10.8	12.6	12.3	10.3	6.8	3.5	0.9	3.1	4.1	6.8	9.8	12.8	16.3	18.3	17.9	15.6	11.3	6.8	3.7	68	61	57	53
Qpe	T-DE-103	2	8	263.781	56	4	47.8091	0.390286	156.75	6.2	7.6	11.4	14.8	18.1	21.9	24.1	23.6	20.9	15.8	10.1	6.5	0.1	0.6	2.2	4.7	7.6	10.8	12.6	12.3	10.3	6.8	3.5	0.9	3.1	4.1	6.8	9.8	12.8	16.3	18.3	17.9	15.6	11.3	6.8	3.7	68	61	57	53
Qpe	T-DE-103	3	8	406.968	59	4	47.8091	0.390286	156.75	6.2	7.6	11.4	14.8	18.1	21.9	24.1	23.6	20.9	15.8	10.1	6.5	0.1	0.6	2.2	4.7	7.6	10.8	12.6	12.3	10.3	6.8	3.5	0.9	3.1	4.1	6.8	9.8	12.8	16.3	18.3	17.9	15.6	11.3	6.8	3.7	68	61	57	53
Qpe	T-DE-103	4	8	266.759	60	4	47.8091	0.390286	156.75	6.2	7.6	11.4	14.8	18.1	21.9	24.1	23.6	20.9	15.8	10.1	6.5	0.1	0.6	2.2	4.7	7.6	10.8	12.6	12.3	10.3	6.8	3.5	0.9	3.1	4.1	6.8	9.8	12.8	16.3	18.3	17.9	15.6	11.3	6.8	3.7	68	61	57	53
Qpe	T-DE-103	1	8	268.184	58	41	56.1315	9.396	250	1.3	1.9	4.1	7.8	13.6	16.9	17.9	18.1	14.6	10.5	6	2.9	-6	-6	-2.9	1.3	6.1	9.4	11	10.2	7.8	4.5	-0.4	-0.8	-2.4	-2	0.6	4.6	9.8	13.1	14.5	14.1	11.2	7.5	2.8	1.1	61	42	47	47
Qpe	T-DE-103	2	8	254.295	59	41	56.1315	9.396	250	1.3	1.9	4.1	7.8	13.6	16.9	17.9	18.1	14.6	10.5	6	2.9	-6	-6	-2.9	1.3	6.1	9.4	11	10.2	7.8	4.5	-0.4	-0.8	-2.4	-2	0.6	4.6	9.8	13.1	14.5	14.1	11.2	7.5	2.8	1.1	61	42	47	47
Qpe	T-DE-103	3	8	288.928	55	41	56.1315	9.396	250	1.3	1.9	4.1	7.8	13.6	16.9	17.9	18.1	14.6	10.5	6	2.9	-6	-6	-2.9	1.3	6.1	9.4	11	10.2	7.8	4.5	-0.4	-0.8	-2.4	-2	0.6	4.6	9.8	13.1	14.5	14.1	11.2	7.5	2.8	1.1	61	42	47	47
Qpe	T-DE-103	4	8	305.787	55	41	56.1315	9.396	250	1.3	1.9	4.1	7.8	13.6	16.9	17.9	18.1	14.6	10.5	6	2.9	-6	-6	-2.9	1.3	6.1	9.4	11	10.2	7.8	4.5	-0.4	-0.8	-2.4	-2	0.6	4.6	9.8	13.1	14.5	14.1	11.2	7.5	2.8	1.1	61	42	47	47
Qpe	T-DE-103	1	8	348.766	49	50	46.604	0.178	130	6.9	8.3	12.3	15.4	18.5	22.5	24.6	24.1	21.8	16.6	11	7.3	0.6	1.2	2.8	5.3	8	11.4	13.2	12.8	11.1	7.4	4.1	1.3	3.7	4.7	7.5	10.3	13.2	16.9	18.9	18.5	16.4	12	7.5	4.3	70	62	57	53
Qpe	T-DE-103	2	8	314.255	56	50	46.604	0.178	130	6.9	8.3	12.3	15.4	18.5	22.5	24.6	24.1	21.8	16.6	11	7.3	0.6	1.2	2.8	5.3	8	11.4	13.2	12.8	11.1	7.4	4.1	1.3	3.7	4.7	7.5	10.3	13.2	16.9	18.9	18.5	16.4	12	7.5	4.3	70	62	57	53
Qpe	T-DE-103	3	8	356.904	61	50	46.604	0.178	130	6.9	8.3	12.3	15.4	18.5	22.5	24.6	24.1	21.8	16.6	11	7.3	0.6	1.2	2.8	5.3	8	11.4	13.2	12.8	11.1	7.4	4.1	1.3	3.7	4.7	7.5	10.3	13.2	16.9	18.9	18.5	16.4	12	7.5	4.3	70	62	57	53
Qpe	T-DE-103	4	8	249.281	59	50	46.604	0.178	130	6.9	8.3	12.3	15.4	18.5	22.5	24.6	24.1	21.8	16.6	11	7.3	0.6	1.2	2.8	5.3	8	11.4	13.2	12.8	11.1	7.4	4.1	1.3	3.7	4.7	7.5	10.3	13.2	16.9	18.9	18.5	16.4	12	7.5	4.3	70	62	57	53
Qpe	T-DE-103	1	8	351.493	52	61	51.769	7.174	75	3.9	5	8.3	12.8	17.4	20.5	21.9	21.5	18.9	14.4	7.9	4.9	-0.9	-0.6	1.6	4.1	7.9	10.8	12.5	12	9.7	6.8	2.8	0.2	1.5	2.2	5	8.5	12.7	15.7	17.2	16.7	14.3	10.6	5.4	2.5	71	49	64	55
Qpe	T-DE-103	2	8	281.491	63	61	51.769	7.174	75	3.9	5	8.3	12.8	17.4	20.5	21.9	21.5	18.9	14.4	7.9	4.9	-0.9	-0.6	1.6	4.1	7.9	10.8	12.5	12	9.7	6.8	2.8	0.2	1.5	2.2	5	8.5	12.7	15.7	17.2	16.7	14.3	10.6	5.4	2.5	71	49	64	55
Qpe	T-DE-103	3	8	389.987	61	61	51.769	7.174	75	3.9	5	8.3	12.8	17.4	20.5	21.9	21.5	18.9	14.4	7.9	4.9	-0.9	-0.6	1.6	4.1	7.9	10.8	12.5	12	9.7	6.8	2.8	0.2	1.5	2.2	5	8.5	12.7	15.7	17.2	16.7	14.3	10.6	5.4	2.5	71	49	64	55
Qpe	T-DE-103	4	8	286.328	116	61	51.769	7.174	75	3.9	5	8.3	12.8	17.4	20.5	21.9	21.5	18.9	14.4	7.9	4.9	-0.9	-0.6	1.6	4.1	7.9	10.8	12.5	12	9.7	6.8	2.8	0.2	1.5	2.2	5	8.5	12.7	15.7	17.2	16.7	14.3	10.6	5.4	2.5	71	49	64	55
Qpe	T-DE-103	1	8	354.823	54	77	47.761	5.487	330	3.4	5.3	10	14.1	17.8	21.1	23.4	22.9	20.1	14.5	8.2	3.9	-1.8	-1.3	1.3	4.4	7.7	11.1	12.9	12.5	10.4	6.2	2	-0.9	0.8	2	5.6	9.2	12.7	16.1	18.1	17.7	15.3	10.4	5.1	1.5	83	71	72	56
Qpe	T-DE-103	2	8	418.412	58	77	47.761	5.487	330	3.4	5.3	10	14.1	17.8	21.1	23.4	22.9	20.1	14.5	8.2	3.9	-1.8	-1.3	1.3	4.4	7.7	11.1	12.9	12.5	10.4	6.2	2	-0.9	0.8	2	5.6	9.2	12.7	16.1	18.1	17.7	15.3	10.4	5.1	1.5	83	71	72	56
Qpe	T-DE-103	3	8	314.05	54	77	47.761	5.487	330	3.4	5.3	10	14.1	17.8	21.1	23.4	22.9	20.1	14.5	8.2	3.9	-1.8	-1.3	1.3	4.4	7.7	11.1	12.9	12.5	10.4	6.2	2	-0.9	0.8	2	5.6	9.2	12.7	16.1	18.1	17.7	15.3	10.4	5.1	1.5	83	71	72	56
Qpe	T-DE-103	1	8	371.348	57	87	49.361	7.872	470	1.1	3.3	7.3	12	16.1	19.9	21.3	20.4	18.6	13	6.2	3	-3.8	-3.2	-0.9	2.4	5.9	9.4	10.9	10.5	8.2	4.6	0.4	-2.2	-1.4	0	3.2	7.2	11	14.6	16.1	15.4	13.4	8.8	3.3	0.4	63	54	51	52
Qpe	T-DE-103	2	8	371.365	61	87	49.361	7.872	470	1.1	3.3	7.3	12	16.1	19.9	21.3	20.4	18.6	13	6.2	3	-3.8	-3.2	-0.9	2.4	5.9	9.4	10.9	10.5	8.2	4.6	0.4	-2.2	-1.4	0	3.2	7.2	11	14.6	16.1	15.4	13.4	8.8	3.3	0.4	63	54	51	52
Qpe	T-DE-103	3	8	382.463	60	87	49.361	7.872	470	1.1	3.3	7.3	12	16.1	19.9	21.3	20.4	18.6	13	6.2	3	-3.8	-3.2	-0.9	2.4	5.9	9.4	10.9	10.5	8.2	4.6	0.4	-2.2	-1.4	0	3.2	7.2	11	14.6	16.1	15.4	13.4	8.8	3.3	0.4	63	54	51	52
Qpe	T-DE-103	4	8	334.538	59	87	49.361	7.872	470	1.1	3.3	7.3	12	16.1	19.9	21.3	20.4	18.6	13	6.2	3	-3.8	-3.2	-0.9	2.4	5.9	9.4	10.9	10.5	8.2	4.6	0.4	-2.2	-1.4	0	3.2	7.2	11	14.6	16.1	15.4	13.4	8.8	3.3	0.4	63	54	51	52
Qpe	T-DE-104	1	8	305.714	119	1	51.7942	-2.4895	90.6667	6.4	6.6	8.9	12.2	15.4	18.9	20.4	19.9	17.5	13.9	9.3	7.3	1.1	1	2	4.4	7.1	10.3	11.8	11.6	9.5	7.1	3.4	1.9	3.8	3.8	5.5	8.3	11.3	14.6	16.1	15.7	13.5	10.5	6.4	4.6	81	56	64	54
Qpe	T-DE-104	2	8	293.501	104	1	51.7942	-2.4895	90.6667	6.4	6.6	8.9	12.2	15.4	18.9	20.4	19.9	17.5	13.9	9.3	7.3	1.1	1	2	4.4	7.1	10.3	11.8	11.6	9.5	7.1	3.4	1.9	3.8	3.8	5.5	8.3	11.3	14.6	16.1	15.7	13.5	10.5	6.4	4.6	81	56	64	54
Qpe	T-DE-104	3	8	298.033	100	1	51.7942	-2.4895	90.6667	6.4	6.6	8.9	12.2	15.4	18.9	20.4	19.9	17.5	13.9	9.3	7.3	1.1	1	2	4.4	7.1	10.3	11.8	11.6	9.5	7.1	3.4	1.9	3.8	3.8	5.5	8.3	11.3	14.6	16.1	15.7	13.5	10.5	6.4	4.6	81	56	64	54
Qpe	T-DE-104	4	8	299.48	115	1	51.7942	-2.4895	90.6667	6.4	6.6	8.9	12.2	15.4	18.9	20.4	19.9	17.5	13.9	9.3	7.3	1.1	1	2	4.4	7.1	10.3	11.8	11.6	9.5	7.1	3.4	1.9	3.8	3.8	5.5	8.3	11.3	14.6	16.1	15.7	13.5	10.5	6.4	4.6	81	56	64	54
Qpe	T-DE-104	1	8	273.12	56	21	46.4607	2.89067	270	6.1	7.8	12	15.1	18.5	22.2	24.7	24.1	21.7	16.3	10.3	6.4	-1	-0.3	1.4	4.2	7.3	10.6	12.3	12	10.2	6.1	2.8	-0.2	2.6	3.7	6.7	9.6	12.9	16.4	18.5	18.1	15.9	11.2	6.6	3.1	58	58	56	55
Qpe	T-DE-104	2	8	350.751	58	21	46.4607	2.89067	270	6.1	7.8	12	15.1	18.5	22.2	24.7	24.1	21.7	16.3	10.3	6.4	-1	-0.3	1.4	4.2	7.3	10.6	12.3	12	10.2	6.1	2.8	-0.2	2.6	3.7	6.7	9.6	12.9	16.4	18.5	18.1	15.9	11.2	6.6	3.1	58	58	56	55
Qpe	T-DE-104	3	8	298.602	57	21	46.4607	2.89067	270	6.1	7.8	12	15.1	18.5	22.2	24.7	24.1	21.7	16.3	10.3	6.4	-1	-0.3	1.4	4.2	7.3	10.6	12.3	12	10.2	6.1	2.8	-0.2	2.6	3.7	6.7	9.6	12.9	16.4	18.5	18.1	15.9	11.2	6.6	3.1	58	58	56	55
Qpe	T-DE-104	4	8	310.231	56	21	46.4607	2.89067	270	6.1	7.8	12	15.1	18.5	22.2	24.7	24.1	21.7	16.3	10.3	6.4	-1	-0.3	1.4	4.2	7.3	10.6	12.3	12	10.2	6.1	2.8	-0.2	2.6	3.7	6.7	9.6	12.9	16.4	18.5	18.1	15.9	11.2	6.6	3.1	58	58	56	55
Qpe	T-DE-104	1	8	205.37	57	26	51.948	-2.45	70	6.5	6.8	9.1	12.2	15.5	18.9	20.3	19.9	17.6	14.2	9.5	7.4	1.2	1.1	2.2	4.5	7.2	10.3	11.8	11.6	9.6	7.3	3.6	2.1	3.9	4	5.6	8.3	11.3	14.6	16.1	15.7	13.6	10.7	6.5	4.8	69	48	55	49
Qpe	T-DE-104	2	8	301.902	58	26	51.948	-2.45	70	6.5	6.8	9.1	12.2	15.5	18.9	20.3	19.9	17.6	14.2	9.5	7.4	1.2	1.1	2.2	4.5	7.2	10.3	11.8	11.6	9.6	7.3	3.6	2.1	3.9	4	5.6	8.3	11.3	14.6	16.1	15.7	13.6	10.7	6.5	4.8	69	48	55	49
Qpe	T-DE-104	3	8	294.209	54	26	51.948	-2.45	70	6.5	6.8	9.1	12.2	15.5	18.9	20.3	19.9	17.6	14.2	9.5	7.4	1.2	1.1	2.2	4.5	7.2	10.3	11.8	11.6	9.6	7.3	3.6	2.1	3.9	4	5.6	8.3	11.3	14.6	16.1	15.7	13.6	10.7	6.5	4.8	69	48	55	49
Qpe	T-DE-104	4	8	251.338	52	26	51.948	-2.45	70	6.5	6.8	9.1	12.2	15.5	18.9	20.3	19.9	17.6	14.2	9.5	7.4	1.2	1.1	2.2	4.5	7.2	10.3	11.8	11.6	9.6	7.3	3.6	2.1	3.9	4	5.6	8.3	11.3	14.6	16.1	15.7	13.6	10.7	6.5	4.8	69	48	55	49
Qpe	T-DE-104	1	8	227.622	58	260	56.071	9.597	25	2.7	3.3	5.4	9.2	14.7	18	19.3	19.1	15.9	11.6	7.3	4.3	-5.4	-5.4	-2	2.8	7.6	11	12.9	11.7	9.3	5.6	1.1	0.2	-1.3	-1	1.7	6	11.1	14.5	16.1	15.4	12.6	8.6	4.2	2.2	59	41	47	43
Qpe	T-DE-104	2	8	266.779	57	260	56.071	9.597	25	2.7	3.3	5.4	9.2	14.7	18	19.3	19.1	15.9	11.6	7.3	4.3	-5.4	-5.4	-2	2.8	7.6	11	12.9	11.7	9.3	5.6	1.1	0.2	-1.3	-1	1.7	6	11.1	14.5	16.1	15.4	12.6	8.6	4.2	2.2	59	41	47	43
Qpe	T-DE-104	3	8	290.525	53	260	56.071	9.597	25	2.7	3.3	5.4	9.2	14.7	18	19.3	19.1	15.9	11.6	7.3	4.3	-5.4	-5.4	-2	2.8	7.6	11	12.9	11.7	9.3	5.6	1.1	0.2	-1.3	-1	1.7	6	11.1	14.5	16.1	15.4	12.6	8.6	4.2	2.2	59	41	47	43
Qpe	T-DE-104	4	8	231.652	58	260	56.071	9.597	25	2.7	3.3	5.4	9.2	14.7	18	19.3	19.1	15.9	11.6	7.3	4.3	-5.4	-5.4	-2	2.8	7.6	11	12.9	11.7	9.3	5.6	1.1	0.2	-1.3	-1	1.7	6	11.1	14.5	16.1	15.4	12.6	8.6	4.2	2.2	59	41	47	43
Qpe	T-DE-104	1	8	265.171	57	263	53.707	9.762	10	2	3.1	6.7	11.8	17	20.3	21.5	21.4	18.6	13	7.3	3.7	-2.6	-2.5	-0.3	2.7	6.6	9.9	11.9	11.5	9	5.8	2.3	-0.8	-0.3	0.3	3.2	7.3	11.8	15.1	16.7	16.4	13.8	9.4	4.8	1.5	62	44	52	47
Qpe	T-DE-104	2	8	236.921	56	263	53.707	9.762	10	2	3.1	6.7	11.8	17	20.3	21.5	21.4	18.6	13	7.3	3.7	-2.6	-2.5	-0.3	2.7	6.6	9.9	11.9	11.5	9	5.8	2.3	-0.8	-0.3	0.3	3.2	7.3	11.8	15.1	16.7	16.4	13.8	9.4	4.8	1.5	62	44	52	47
Qpe	T-DE-104	3	8	210.536	54	263	53.707	9.762	10	2	3.1	6.7	11.8	17	20.3	21.5	21.4	18.6	13	7.3	3.7	-2.6	-2.5	-0.3	2.7	6.6	9.9	11.9	11.5	9	5.8	2.3	-0.8	-0.3	0.3	3.2	7.3	11.8	15.1	16.7	16.4	13.8	9.4	4.8	1.5	62	44	52	47
Qpe	T-DE-104	4	8	260.999	62	263	53.707	9.762	10	2	3.1	6.7	11.8	17	20.3	21.5	21.4	18.6	13	7.3	3.7	-2.6	-2.5	-0.3	2.7	6.6	9.9	11.9	11.5	9	5.8	2.3	-0.8	-0.3	0.3	3.2	7.3	11.8	15.1	16.7	16.4	13.8	9.4	4.8	1.5	62	44	52	47
Qpe	T-DE-104	1	8	224.144	50	31	52.8327	10.317	110	2	3.1	7.1	12.2	17.7	21	22.3	22	18.5	13	7	3.3	-3.1	-3	-0.8	2.4	6.3	9.6	11.7	11.2	8.5	5.2	1.8	-1.6	-0.6	0	3.1	7.3	12	15.3	17	16.6	13.5	9.1	4.4	0.8	53	42	47	50
Qpe	T-DE-104	2	8	318.567	36	31	52.8327	10.317	110	2	3.1	7.1	12.2	17.7	21	22.3	22	18.5	13	7	3.3	-3.1	-3	-0.8	2.4	6.3	9.6	11.7	11.2	8.5	5.2	1.8	-1.6	-0.6	0	3.1	7.3	12	15.3	17	16.6	13.5	9.1	4.4	0.8	53	42	47	50
Qpe	T-DE-104	3	8	262.039	42	31	52.8327	10.317	110	2	3.1	7.1	12.2	17.7	21	22.3	22	18.5	13	7	3.3	-3.1	-3	-0.8	2.4	6.3	9.6	11.7	11.2	8.5	5.2	1.8	-1.6	-0.6	0	3.1	7.3	12	15.3	17	16.6	13.5	9.1	4.4	0.8	53	42	47	50
Qpe	T-DE-104	4	8	264.335	42	31	52.8327	10.317	110	2	3.1	7.1	12.2	17.7	21	22.3	22	18.5	13	7	3.3	-3.1	-3	-0.8	2.4	6.3	9.6	11.7	11.2	8.5	5.2	1.8	-1.6	-0.6	0	3.1	7.3	12	15.3	17	16.6	13.5	9.1	4.4	0.8	53	42	47	50
Qpe	T-DE-104	1	8	308.782	54	33	51.1827	17.9313	210	-0.2	1.5	6.7	13	18.2	21.7	22.8	22.6	18.6	13.6	6.9	2.1	-5.7	-4.5	-0.9	3	7.4	10.9	12	11.6	8.8	4.7	1	-3.1	-3	-1.5	2.9	8	12.8	16.3	17.4	17.1	13.7	9.1	4	-0.5	31	28	29	37
Qpe	T-DE-104	2	8	276.597	61	33	51.1827	17.9313	210	-0.2	1.5	6.7	13	18.2	21.7	22.8	22.6	18.6	13.6	6.9	2.1	-5.7	-4.5	-0.9	3	7.4	10.9	12	11.6	8.8	4.7	1	-3.1	-3	-1.5	2.9	8	12.8	16.3	17.4	17.1	13.7	9.1	4	-0.5	31	28	29	37
Qpe	T-DE-104	3	8	320.53	53	33	51.1827	17.9313	210	-0.2	1.5	6.7	13	18.2	21.7	22.8	22.6	18.6	13.6	6.9	2.1	-5.7	-4.5	-0.9	3	7.4	10.9	12	11.6	8.8	4.7	1	-3.1	-3	-1.5	2.9	8	12.8	16.3	17.4	17.1	13.7	9.1	4	-0.5	31	28	29	37
Qpe	T-DE-104	4	8	296.683	55	33	51.1827	17.9313	210	-0.2	1.5	6.7	13	18.2	21.7	22.8	22.6	18.6	13.6	6.9	2.1	-5.7	-4.5	-0.9	3	7.4	10.9	12	11.6	8.8	4.7	1	-3.1	-3	-1.5	2.9	8	12.8	16.3	17.4	17.1	13.7	9.1	4	-0.5	31	28	29	37
Qpe	T-DE-104	1	8	254.123	53	4	47.8091	0.390286	156.75	6.2	7.6	11.4	14.8	18.1	21.9	24.1	23.6	20.9	15.8	10.1	6.5	0.1	0.6	2.2	4.7	7.6	10.8	12.6	12.3	10.3	6.8	3.5	0.9	3.1	4.1	6.8	9.8	12.8	16.3	18.3	17.9	15.6	11.3	6.8	3.7	68	61	57	53
Qpe	T-DE-104	2	8	304.752	52	4	47.8091	0.390286	156.75	6.2	7.6	11.4	14.8	18.1	21.9	24.1	23.6	20.9	15.8	10.1	6.5	0.1	0.6	2.2	4.7	7.6	10.8	12.6	12.3	10.3	6.8	3.5	0.9	3.1	4.1	6.8	9.8	12.8	16.3	18.3	17.9	15.6	11.3	6.8	3.7	68	61	57	53
Qpe	T-DE-104	3	8	235.951	52	4	47.8091	0.390286	156.75	6.2	7.6	11.4	14.8	18.1	21.9	24.1	23.6	20.9	15.8	10.1	6.5	0.1	0.6	2.2	4.7	7.6	10.8	12.6	12.3	10.3	6.8	3.5	0.9	3.1	4.1	6.8	9.8	12.8	16.3	18.3	17.9	15.6	11.3	6.8	3.7	68	61	57	53
Qpe	T-DE-104	4	8	278.189	53	4	47.8091	0.390286	156.75	6.2	7.6	11.4	14.8	18.1	21.9	24.1	23.6	20.9	15.8	10.1	6.5	0.1	0.6	2.2	4.7	7.6	10.8	12.6	12.3	10.3	6.8	3.5	0.9	3.1	4.1	6.8	9.8	12.8	16.3	18.3	17.9	15.6	11.3	6.8	3.7	68	61	57	53
Qpe	T-DE-104	1	8	254.304	54	41	56.1315	9.396	250	1.3	1.9	4.1	7.8	13.6	16.9	17.9	18.1	14.6	10.5	6	2.9	-6	-6	-2.9	1.3	6.1	9.4	11	10.2	7.8	4.5	-0.4	-0.8	-2.4	-2	0.6	4.6	9.8	13.1	14.5	14.1	11.2	7.5	2.8	1.1	61	42	47	47
Qpe	T-DE-104	2	8	265.359	63	41	56.1315	9.396	250	1.3	1.9	4.1	7.8	13.6	16.9	17.9	18.1	14.6	10.5	6	2.9	-6	-6	-2.9	1.3	6.1	9.4	11	10.2	7.8	4.5	-0.4	-0.8	-2.4	-2	0.6	4.6	9.8	13.1	14.5	14.1	11.2	7.5	2.8	1.1	61	42	47	47
Qpe	T-DE-104	3	8	269.221	60	41	56.1315	9.396	250	1.3	1.9	4.1	7.8	13.6	16.9	17.9	18.1	14.6	10.5	6	2.9	-6	-6	-2.9	1.3	6.1	9.4	11	10.2	7.8	4.5	-0.4	-0.8	-2.4	-2	0.6	4.6	9.8	13.1	14.5	14.1	11.2	7.5	2.8	1.1	61	42	47	47
Qpe	T-DE-104	4	8	304.602	45	41	56.1315	9.396	250	1.3	1.9	4.1	7.8	13.6	16.9	17.9	18.1	14.6	10.5	6	2.9	-6	-6	-2.9	1.3	6.1	9.4	11	10.2	7.8	4.5	-0.4	-0.8	-2.4	-2	0.6	4.6	9.8	13.1	14.5	14.1	11.2	7.5	2.8	1.1	61	42	47	47
Qpe	T-DE-104	1	8	277.805	62	50	46.604	0.178	130	6.9	8.3	12.3	15.4	18.5	22.5	24.6	24.1	21.8	16.6	11	7.3	0.6	1.2	2.8	5.3	8	11.4	13.2	12.8	11.1	7.4	4.1	1.3	3.7	4.7	7.5	10.3	13.2	16.9	18.9	18.5	16.4	12	7.5	4.3	70	62	57	53
Qpe	T-DE-104	2	8	249.688	56	50	46.604	0.178	130	6.9	8.3	12.3	15.4	18.5	22.5	24.6	24.1	21.8	16.6	11	7.3	0.6	1.2	2.8	5.3	8	11.4	13.2	12.8	11.1	7.4	4.1	1.3	3.7	4.7	7.5	10.3	13.2	16.9	18.9	18.5	16.4	12	7.5	4.3	70	62	57	53
Qpe	T-DE-104	3	8	290.341	62	50	46.604	0.178	130	6.9	8.3	12.3	15.4	18.5	22.5	24.6	24.1	21.8	16.6	11	7.3	0.6	1.2	2.8	5.3	8	11.4	13.2	12.8	11.1	7.4	4.1	1.3	3.7	4.7	7.5	10.3	13.2	16.9	18.9	18.5	16.4	12	7.5	4.3	70	62	57	53
Qpe	T-DE-104	4	8	275.846	59	50	46.604	0.178	130	6.9	8.3	12.3	15.4	18.5	22.5	24.6	24.1	21.8	16.6	11	7.3	0.6	1.2	2.8	5.3	8	11.4	13.2	12.8	11.1	7.4	4.1	1.3	3.7	4.7	7.5	10.3	13.2	16.9	18.9	18.5	16.4	12	7.5	4.3	70	62	57	53
Qpe	T-DE-104	1	8	291.057	93	61	51.769	7.174	75	3.9	5	8.3	12.8	17.4	20.5	21.9	21.5	18.9	14.4	7.9	4.9	-0.9	-0.6	1.6	4.1	7.9	10.8	12.5	12	9.7	6.8	2.8	0.2	1.5	2.2	5	8.5	12.7	15.7	17.2	16.7	14.3	10.6	5.4	2.5	71	49	64	55
Qpe	T-DE-104	2	8	279.703	92	61	51.769	7.174	75	3.9	5	8.3	12.8	17.4	20.5	21.9	21.5	18.9	14.4	7.9	4.9	-0.9	-0.6	1.6	4.1	7.9	10.8	12.5	12	9.7	6.8	2.8	0.2	1.5	2.2	5	8.5	12.7	15.7	17.2	16.7	14.3	10.6	5.4	2.5	71	49	64	55
Qpe	T-DE-104	3	8	339.217	109	61	51.769	7.174	75	3.9	5	8.3	12.8	17.4	20.5	21.9	21.5	18.9	14.4	7.9	4.9	-0.9	-0.6	1.6	4.1	7.9	10.8	12.5	12	9.7	6.8	2.8	0.2	1.5	2.2	5	8.5	12.7	15.7	17.2	16.7	14.3	10.6	5.4	2.5	71	49	64	55
Qpe	T-DE-104	4	8	307.686	102	61	51.769	7.174	75	3.9	5	8.3	12.8	17.4	20.5	21.9	21.5	18.9	14.4	7.9	4.9	-0.9	-0.6	1.6	4.1	7.9	10.8	12.5	12	9.7	6.8	2.8	0.2	1.5	2.2	5	8.5	12.7	15.7	17.2	16.7	14.3	10.6	5.4	2.5	71	49	64	55
Qpe	T-DE-104	1	8	118.504	42	77	47.761	5.487	330	3.4	5.3	10	14.1	17.8	21.1	23.4	22.9	20.1	14.5	8.2	3.9	-1.8	-1.3	1.3	4.4	7.7	11.1	12.9	12.5	10.4	6.2	2	-0.9	0.8	2	5.6	9.2	12.7	16.1	18.1	17.7	15.3	10.4	5.1	1.5	83	71	72	56
Qpe	T-DE-104	2	8	271.881	58	77	47.761	5.487	330	3.4	5.3	10	14.1	17.8	21.1	23.4	22.9	20.1	14.5	8.2	3.9	-1.8	-1.3	1.3	4.4	7.7	11.1	12.9	12.5	10.4	6.2	2	-0.9	0.8	2	5.6	9.2	12.7	16.1	18.1	17.7	15.3	10.4	5.1	1.5	83	71	72	56
Qpe	T-DE-104	3	8	289.709	54	77	47.761	5.487	330	3.4	5.3	10	14.1	17.8	21.1	23.4	22.9	20.1	14.5	8.2	3.9	-1.8	-1.3	1.3	4.4	7.7	11.1	12.9	12.5	10.4	6.2	2	-0.9	0.8	2	5.6	9.2	12.7	16.1	18.1	17.7	15.3	10.4	5.1	1.5	83	71	72	56
Qpe	T-DE-104	4	8	339.008	59	77	47.761	5.487	330	3.4	5.3	10	14.1	17.8	21.1	23.4	22.9	20.1	14.5	8.2	3.9	-1.8	-1.3	1.3	4.4	7.7	11.1	12.9	12.5	10.4	6.2	2	-0.9	0.8	2	5.6	9.2	12.7	16.1	18.1	17.7	15.3	10.4	5.1	1.5	83	71	72	56
Qpe	T-DE-104	1	8	298.617	109	87	49.361	7.872	470	1.1	3.3	7.3	12	16.1	19.9	21.3	20.4	18.6	13	6.2	3	-3.8	-3.2	-0.9	2.4	5.9	9.4	10.9	10.5	8.2	4.6	0.4	-2.2	-1.4	0	3.2	7.2	11	14.6	16.1	15.4	13.4	8.8	3.3	0.4	63	54	51	52
Qpe	T-DE-104	2	8	310.834	104	87	49.361	7.872	470	1.1	3.3	7.3	12	16.1	19.9	21.3	20.4	18.6	13	6.2	3	-3.8	-3.2	-0.9	2.4	5.9	9.4	10.9	10.5	8.2	4.6	0.4	-2.2	-1.4	0	3.2	7.2	11	14.6	16.1	15.4	13.4	8.8	3.3	0.4	63	54	51	52
Qpe	T-DE-104	3	8	323.428	109	87	49.361	7.872	470	1.1	3.3	7.3	12	16.1	19.9	21.3	20.4	18.6	13	6.2	3	-3.8	-3.2	-0.9	2.4	5.9	9.4	10.9	10.5	8.2	4.6	0.4	-2.2	-1.4	0	3.2	7.2	11	14.6	16.1	15.4	13.4	8.8	3.3	0.4	63	54	51	52
Qpe	T-DE-104	4	8	307.427	111	87	49.361	7.872	470	1.1	3.3	7.3	12	16.1	19.9	21.3	20.4	18.6	13	6.2	3	-3.8	-3.2	-0.9	2.4	5.9	9.4	10.9	10.5	8.2	4.6	0.4	-2.2	-1.4	0	3.2	7.2	11	14.6	16.1	15.4	13.4	8.8	3.3	0.4	63	54	51	52
Qpe	T-DE-105	1	8	464.262	85	1	51.7942	-2.4895	90.6667	6.4	6.6	8.9	12.2	15.4	18.9	20.4	19.9	17.5	13.9	9.3	7.3	1.1	1	2	4.4	7.1	10.3	11.8	11.6	9.5	7.1	3.4	1.9	3.8	3.8	5.5	8.3	11.3	14.6	16.1	15.7	13.5	10.5	6.4	4.6	81	56	64	54
Qpe	T-DE-105	2	8	397.471	106	1	51.7942	-2.4895	90.6667	6.4	6.6	8.9	12.2	15.4	18.9	20.4	19.9	17.5	13.9	9.3	7.3	1.1	1	2	4.4	7.1	10.3	11.8	11.6	9.5	7.1	3.4	1.9	3.8	3.8	5.5	8.3	11.3	14.6	16.1	15.7	13.5	10.5	6.4	4.6	81	56	64	54
Qpe	T-DE-105	3	8	583.627	125	1	51.7942	-2.4895	90.6667	6.4	6.6	8.9	12.2	15.4	18.9	20.4	19.9	17.5	13.9	9.3	7.3	1.1	1	2	4.4	7.1	10.3	11.8	11.6	9.5	7.1	3.4	1.9	3.8	3.8	5.5	8.3	11.3	14.6	16.1	15.7	13.5	10.5	6.4	4.6	81	56	64	54
Qpe	T-DE-105	1	8	470.699	52	21	46.4607	2.89067	270	6.1	7.8	12	15.1	18.5	22.2	24.7	24.1	21.7	16.3	10.3	6.4	-1	-0.3	1.4	4.2	7.3	10.6	12.3	12	10.2	6.1	2.8	-0.2	2.6	3.7	6.7	9.6	12.9	16.4	18.5	18.1	15.9	11.2	6.6	3.1	58	58	56	55
Qpe	T-DE-105	2	8	390.187	55	21	46.4607	2.89067	270	6.1	7.8	12	15.1	18.5	22.2	24.7	24.1	21.7	16.3	10.3	6.4	-1	-0.3	1.4	4.2	7.3	10.6	12.3	12	10.2	6.1	2.8	-0.2	2.6	3.7	6.7	9.6	12.9	16.4	18.5	18.1	15.9	11.2	6.6	3.1	58	58	56	55
Qpe	T-DE-105	3	8	514.322	52	21	46.4607	2.89067	270	6.1	7.8	12	15.1	18.5	22.2	24.7	24.1	21.7	16.3	10.3	6.4	-1	-0.3	1.4	4.2	7.3	10.6	12.3	12	10.2	6.1	2.8	-0.2	2.6	3.7	6.7	9.6	12.9	16.4	18.5	18.1	15.9	11.2	6.6	3.1	58	58	56	55
Qpe	T-DE-105	1	8	447.576	50	26	51.948	-2.45	70	6.5	6.8	9.1	12.2	15.5	18.9	20.3	19.9	17.6	14.2	9.5	7.4	1.2	1.1	2.2	4.5	7.2	10.3	11.8	11.6	9.6	7.3	3.6	2.1	3.9	4	5.6	8.3	11.3	14.6	16.1	15.7	13.6	10.7	6.5	4.8	69	48	55	49
Qpe	T-DE-105	2	8	441.98	60	26	51.948	-2.45	70	6.5	6.8	9.1	12.2	15.5	18.9	20.3	19.9	17.6	14.2	9.5	7.4	1.2	1.1	2.2	4.5	7.2	10.3	11.8	11.6	9.6	7.3	3.6	2.1	3.9	4	5.6	8.3	11.3	14.6	16.1	15.7	13.6	10.7	6.5	4.8	69	48	55	49
Qpe	T-DE-105	3	8	459.986	55	26	51.948	-2.45	70	6.5	6.8	9.1	12.2	15.5	18.9	20.3	19.9	17.6	14.2	9.5	7.4	1.2	1.1	2.2	4.5	7.2	10.3	11.8	11.6	9.6	7.3	3.6	2.1	3.9	4	5.6	8.3	11.3	14.6	16.1	15.7	13.6	10.7	6.5	4.8	69	48	55	49
Qpe	T-DE-105	1	8	380.842	59	260	56.071	9.597	25	2.7	3.3	5.4	9.2	14.7	18	19.3	19.1	15.9	11.6	7.3	4.3	-5.4	-5.4	-2	2.8	7.6	11	12.9	11.7	9.3	5.6	1.1	0.2	-1.3	-1	1.7	6	11.1	14.5	16.1	15.4	12.6	8.6	4.2	2.2	59	41	47	43
Qpe	T-DE-105	2	8	389.478	57	260	56.071	9.597	25	2.7	3.3	5.4	9.2	14.7	18	19.3	19.1	15.9	11.6	7.3	4.3	-5.4	-5.4	-2	2.8	7.6	11	12.9	11.7	9.3	5.6	1.1	0.2	-1.3	-1	1.7	6	11.1	14.5	16.1	15.4	12.6	8.6	4.2	2.2	59	41	47	43
Qpe	T-DE-105	3	8	397.211	58	260	56.071	9.597	25	2.7	3.3	5.4	9.2	14.7	18	19.3	19.1	15.9	11.6	7.3	4.3	-5.4	-5.4	-2	2.8	7.6	11	12.9	11.7	9.3	5.6	1.1	0.2	-1.3	-1	1.7	6	11.1	14.5	16.1	15.4	12.6	8.6	4.2	2.2	59	41	47	43
Qpe	T-DE-105	1	8	363.7	59	263	53.707	9.762	10	2	3.1	6.7	11.8	17	20.3	21.5	21.4	18.6	13	7.3	3.7	-2.6	-2.5	-0.3	2.7	6.6	9.9	11.9	11.5	9	5.8	2.3	-0.8	-0.3	0.3	3.2	7.3	11.8	15.1	16.7	16.4	13.8	9.4	4.8	1.5	62	44	52	47
Qpe	T-DE-105	2	8	371.142	54	263	53.707	9.762	10	2	3.1	6.7	11.8	17	20.3	21.5	21.4	18.6	13	7.3	3.7	-2.6	-2.5	-0.3	2.7	6.6	9.9	11.9	11.5	9	5.8	2.3	-0.8	-0.3	0.3	3.2	7.3	11.8	15.1	16.7	16.4	13.8	9.4	4.8	1.5	62	44	52	47
Qpe	T-DE-105	3	8	454.223	49	263	53.707	9.762	10	2	3.1	6.7	11.8	17	20.3	21.5	21.4	18.6	13	7.3	3.7	-2.6	-2.5	-0.3	2.7	6.6	9.9	11.9	11.5	9	5.8	2.3	-0.8	-0.3	0.3	3.2	7.3	11.8	15.1	16.7	16.4	13.8	9.4	4.8	1.5	62	44	52	47
Qpe	T-DE-105	1	8	344.524	19	277	40.917	31.667	1200	2.1	3.8	8.1	12.7	17.1	20.7	22.8	23	20.4	14.9	10.3	4.2	-4.5	-3.4	-1.1	2.7	6.5	9.2	11.4	11.1	8.7	5	1.6	-2	-1.2	0.2	3.5	7.7	11.8	14.9	17.1	17	14.6	10	6	1.1	87	69	68	67
Qpe	T-DE-105	2	8	211.599	44	277	40.917	31.667	1200	2.1	3.8	8.1	12.7	17.1	20.7	22.8	23	20.4	14.9	10.3	4.2	-4.5	-3.4	-1.1	2.7	6.5	9.2	11.4	11.1	8.7	5	1.6	-2	-1.2	0.2	3.5	7.7	11.8	14.9	17.1	17	14.6	10	6	1.1	87	69	68	67
Qpe	T-DE-105	3	8	333.081	52	277	40.917	31.667	1200	2.1	3.8	8.1	12.7	17.1	20.7	22.8	23	20.4	14.9	10.3	4.2	-4.5	-3.4	-1.1	2.7	6.5	9.2	11.4	11.1	8.7	5	1.6	-2	-1.2	0.2	3.5	7.7	11.8	14.9	17.1	17	14.6	10	6	1.1	87	69	68	67
Qpe	T-DE-105	1	8	430.293	55	31	52.8327	10.317	110	2	3.1	7.1	12.2	17.7	21	22.3	22	18.5	13	7	3.3	-3.1	-3	-0.8	2.4	6.3	9.6	11.7	11.2	8.5	5.2	1.8	-1.6	-0.6	0	3.1	7.3	12	15.3	17	16.6	13.5	9.1	4.4	0.8	53	42	47	50
Qpe	T-DE-105	2	8	455.945	57	31	52.8327	10.317	110	2	3.1	7.1	12.2	17.7	21	22.3	22	18.5	13	7	3.3	-3.1	-3	-0.8	2.4	6.3	9.6	11.7	11.2	8.5	5.2	1.8	-1.6	-0.6	0	3.1	7.3	12	15.3	17	16.6	13.5	9.1	4.4	0.8	53	42	47	50
Qpe	T-DE-105	3	8	506.426	59	31	52.8327	10.317	110	2	3.1	7.1	12.2	17.7	21	22.3	22	18.5	13	7	3.3	-3.1	-3	-0.8	2.4	6.3	9.6	11.7	11.2	8.5	5.2	1.8	-1.6	-0.6	0	3.1	7.3	12	15.3	17	16.6	13.5	9.1	4.4	0.8	53	42	47	50
Qpe	T-DE-105	1	8	416.294	45	33	51.1827	17.9313	210	-0.2	1.5	6.7	13	18.2	21.7	22.8	22.6	18.6	13.6	6.9	2.1	-5.7	-4.5	-0.9	3	7.4	10.9	12	11.6	8.8	4.7	1	-3.1	-3	-1.5	2.9	8	12.8	16.3	17.4	17.1	13.7	9.1	4	-0.5	31	28	29	37
Qpe	T-DE-105	2	8	495.711	55	33	51.1827	17.9313	210	-0.2	1.5	6.7	13	18.2	21.7	22.8	22.6	18.6	13.6	6.9	2.1	-5.7	-4.5	-0.9	3	7.4	10.9	12	11.6	8.8	4.7	1	-3.1	-3	-1.5	2.9	8	12.8	16.3	17.4	17.1	13.7	9.1	4	-0.5	31	28	29	37
Qpe	T-DE-105	3	8	402.794	60	33	51.1827	17.9313	210	-0.2	1.5	6.7	13	18.2	21.7	22.8	22.6	18.6	13.6	6.9	2.1	-5.7	-4.5	-0.9	3	7.4	10.9	12	11.6	8.8	4.7	1	-3.1	-3	-1.5	2.9	8	12.8	16.3	17.4	17.1	13.7	9.1	4	-0.5	31	28	29	37
Qpe	T-DE-105	1	8	291.856	32	4	47.8091	0.390286	156.75	6.2	7.6	11.4	14.8	18.1	21.9	24.1	23.6	20.9	15.8	10.1	6.5	0.1	0.6	2.2	4.7	7.6	10.8	12.6	12.3	10.3	6.8	3.5	0.9	3.1	4.1	6.8	9.8	12.8	16.3	18.3	17.9	15.6	11.3	6.8	3.7	68	61	57	53
Qpe	T-DE-105	2	8	438.503	60	4	47.8091	0.390286	156.75	6.2	7.6	11.4	14.8	18.1	21.9	24.1	23.6	20.9	15.8	10.1	6.5	0.1	0.6	2.2	4.7	7.6	10.8	12.6	12.3	10.3	6.8	3.5	0.9	3.1	4.1	6.8	9.8	12.8	16.3	18.3	17.9	15.6	11.3	6.8	3.7	68	61	57	53
Qpe	T-DE-105	3	8	478.23	59	4	47.8091	0.390286	156.75	6.2	7.6	11.4	14.8	18.1	21.9	24.1	23.6	20.9	15.8	10.1	6.5	0.1	0.6	2.2	4.7	7.6	10.8	12.6	12.3	10.3	6.8	3.5	0.9	3.1	4.1	6.8	9.8	12.8	16.3	18.3	17.9	15.6	11.3	6.8	3.7	68	61	57	53
Qpe	T-DE-105	1	8	379.816	35	41	56.1315	9.396	250	1.3	1.9	4.1	7.8	13.6	16.9	17.9	18.1	14.6	10.5	6	2.9	-6	-6	-2.9	1.3	6.1	9.4	11	10.2	7.8	4.5	-0.4	-0.8	-2.4	-2	0.6	4.6	9.8	13.1	14.5	14.1	11.2	7.5	2.8	1.1	61	42	47	47
Qpe	T-DE-105	2	8	309.297	51	41	56.1315	9.396	250	1.3	1.9	4.1	7.8	13.6	16.9	17.9	18.1	14.6	10.5	6	2.9	-6	-6	-2.9	1.3	6.1	9.4	11	10.2	7.8	4.5	-0.4	-0.8	-2.4	-2	0.6	4.6	9.8	13.1	14.5	14.1	11.2	7.5	2.8	1.1	61	42	47	47
Qpe	T-DE-105	3	8	384.176	58	41	56.1315	9.396	250	1.3	1.9	4.1	7.8	13.6	16.9	17.9	18.1	14.6	10.5	6	2.9	-6	-6	-2.9	1.3	6.1	9.4	11	10.2	7.8	4.5	-0.4	-0.8	-2.4	-2	0.6	4.6	9.8	13.1	14.5	14.1	11.2	7.5	2.8	1.1	61	42	47	47
Qpe	T-DE-105	1	8	350.411	42	50	46.604	0.178	130	6.9	8.3	12.3	15.4	18.5	22.5	24.6	24.1	21.8	16.6	11	7.3	0.6	1.2	2.8	5.3	8	11.4	13.2	12.8	11.1	7.4	4.1	1.3	3.7	4.7	7.5	10.3	13.2	16.9	18.9	18.5	16.4	12	7.5	4.3	70	62	57	53
Qpe	T-DE-105	2	8	374.183	56	50	46.604	0.178	130	6.9	8.3	12.3	15.4	18.5	22.5	24.6	24.1	21.8	16.6	11	7.3	0.6	1.2	2.8	5.3	8	11.4	13.2	12.8	11.1	7.4	4.1	1.3	3.7	4.7	7.5	10.3	13.2	16.9	18.9	18.5	16.4	12	7.5	4.3	70	62	57	53
Qpe	T-DE-105	3	8	475.106	61	50	46.604	0.178	130	6.9	8.3	12.3	15.4	18.5	22.5	24.6	24.1	21.8	16.6	11	7.3	0.6	1.2	2.8	5.3	8	11.4	13.2	12.8	11.1	7.4	4.1	1.3	3.7	4.7	7.5	10.3	13.2	16.9	18.9	18.5	16.4	12	7.5	4.3	70	62	57	53
Qpe	T-DE-105	1	8	446.926	50	61	51.769	7.174	75	3.9	5	8.3	12.8	17.4	20.5	21.9	21.5	18.9	14.4	7.9	4.9	-0.9	-0.6	1.6	4.1	7.9	10.8	12.5	12	9.7	6.8	2.8	0.2	1.5	2.2	5	8.5	12.7	15.7	17.2	16.7	14.3	10.6	5.4	2.5	71	49	64	55
Qpe	T-DE-105	2	8	333.77	45	61	51.769	7.174	75	3.9	5	8.3	12.8	17.4	20.5	21.9	21.5	18.9	14.4	7.9	4.9	-0.9	-0.6	1.6	4.1	7.9	10.8	12.5	12	9.7	6.8	2.8	0.2	1.5	2.2	5	8.5	12.7	15.7	17.2	16.7	14.3	10.6	5.4	2.5	71	49	64	55
Qpe	T-DE-105	3	8	495.489	55	61	51.769	7.174	75	3.9	5	8.3	12.8	17.4	20.5	21.9	21.5	18.9	14.4	7.9	4.9	-0.9	-0.6	1.6	4.1	7.9	10.8	12.5	12	9.7	6.8	2.8	0.2	1.5	2.2	5	8.5	12.7	15.7	17.2	16.7	14.3	10.6	5.4	2.5	71	49	64	55
Qpe	T-DE-105	1	8	429.314	54	77	47.761	5.487	330	3.4	5.3	10	14.1	17.8	21.1	23.4	22.9	20.1	14.5	8.2	3.9	-1.8	-1.3	1.3	4.4	7.7	11.1	12.9	12.5	10.4	6.2	2	-0.9	0.8	2	5.6	9.2	12.7	16.1	18.1	17.7	15.3	10.4	5.1	1.5	83	71	72	56
Qpe	T-DE-105	2	8	356.137	54	77	47.761	5.487	330	3.4	5.3	10	14.1	17.8	21.1	23.4	22.9	20.1	14.5	8.2	3.9	-1.8	-1.3	1.3	4.4	7.7	11.1	12.9	12.5	10.4	6.2	2	-0.9	0.8	2	5.6	9.2	12.7	16.1	18.1	17.7	15.3	10.4	5.1	1.5	83	71	72	56
Qpe	T-DE-105	3	8	458.98	56	77	47.761	5.487	330	3.4	5.3	10	14.1	17.8	21.1	23.4	22.9	20.1	14.5	8.2	3.9	-1.8	-1.3	1.3	4.4	7.7	11.1	12.9	12.5	10.4	6.2	2	-0.9	0.8	2	5.6	9.2	12.7	16.1	18.1	17.7	15.3	10.4	5.1	1.5	83	71	72	56
Qpe	T-DE-105	1	8	428.646	109	87	49.361	7.872	470	1.1	3.3	7.3	12	16.1	19.9	21.3	20.4	18.6	13	6.2	3	-3.8	-3.2	-0.9	2.4	5.9	9.4	10.9	10.5	8.2	4.6	0.4	-2.2	-1.4	0	3.2	7.2	11	14.6	16.1	15.4	13.4	8.8	3.3	0.4	63	54	51	52
Qpe	T-DE-105	2	8	424.606	107	87	49.361	7.872	470	1.1	3.3	7.3	12	16.1	19.9	21.3	20.4	18.6	13	6.2	3	-3.8	-3.2	-0.9	2.4	5.9	9.4	10.9	10.5	8.2	4.6	0.4	-2.2	-1.4	0	3.2	7.2	11	14.6	16.1	15.4	13.4	8.8	3.3	0.4	63	54	51	52
Qpe	T-DE-105	3	8	521.558	108	87	49.361	7.872	470	1.1	3.3	7.3	12	16.1	19.9	21.3	20.4	18.6	13	6.2	3	-3.8	-3.2	-0.9	2.4	5.9	9.4	10.9	10.5	8.2	4.6	0.4	-2.2	-1.4	0	3.2	7.2	11	14.6	16.1	15.4	13.4	8.8	3.3	0.4	63	54	51	52
Qpe	T-DK-001	2	8	425.25	8	1	51.7942	-2.4895	90.6667	6.4	6.6	8.9	12.2	15.4	18.9	20.4	19.9	17.5	13.9	9.3	7.3	1.1	1	2	4.4	7.1	10.3	11.8	11.6	9.5	7.1	3.4	1.9	3.8	3.8	5.5	8.3	11.3	14.6	16.1	15.7	13.5	10.5	6.4	4.6	81	56	64	54
Qpe	T-DK-001	3	8	427.676	17	1	51.7942	-2.4895	90.6667	6.4	6.6	8.9	12.2	15.4	18.9	20.4	19.9	17.5	13.9	9.3	7.3	1.1	1	2	4.4	7.1	10.3	11.8	11.6	9.5	7.1	3.4	1.9	3.8	3.8	5.5	8.3	11.3	14.6	16.1	15.7	13.5	10.5	6.4	4.6	81	56	64	54
Qpe	T-DK-001	4	8	423.188	8	1	51.7942	-2.4895	90.6667	6.4	6.6	8.9	12.2	15.4	18.9	20.4	19.9	17.5	13.9	9.3	7.3	1.1	1	2	4.4	7.1	10.3	11.8	11.6	9.5	7.1	3.4	1.9	3.8	3.8	5.5	8.3	11.3	14.6	16.1	15.7	13.5	10.5	6.4	4.6	81	56	64	54
Qpe	T-DK-001	5	8	402.111	9	1	51.7942	-2.4895	90.6667	6.4	6.6	8.9	12.2	15.4	18.9	20.4	19.9	17.5	13.9	9.3	7.3	1.1	1	2	4.4	7.1	10.3	11.8	11.6	9.5	7.1	3.4	1.9	3.8	3.8	5.5	8.3	11.3	14.6	16.1	15.7	13.5	10.5	6.4	4.6	81	56	64	54
Qpe	T-DK-001	6	8	430.5	12	1	51.7942	-2.4895	90.6667	6.4	6.6	8.9	12.2	15.4	18.9	20.4	19.9	17.5	13.9	9.3	7.3	1.1	1	2	4.4	7.1	10.3	11.8	11.6	9.5	7.1	3.4	1.9	3.8	3.8	5.5	8.3	11.3	14.6	16.1	15.7	13.5	10.5	6.4	4.6	81	56	64	54
Qpe	T-DK-001	2	8	381.222	9	21	46.4607	2.89067	270	6.1	7.8	12	15.1	18.5	22.2	24.7	24.1	21.7	16.3	10.3	6.4	-1	-0.3	1.4	4.2	7.3	10.6	12.3	12	10.2	6.1	2.8	-0.2	2.6	3.7	6.7	9.6	12.9	16.4	18.5	18.1	15.9	11.2	6.6	3.1	58	58	56	55
Qpe	T-DK-001	3	8	374.444	9	21	46.4607	2.89067	270	6.1	7.8	12	15.1	18.5	22.2	24.7	24.1	21.7	16.3	10.3	6.4	-1	-0.3	1.4	4.2	7.3	10.6	12.3	12	10.2	6.1	2.8	-0.2	2.6	3.7	6.7	9.6	12.9	16.4	18.5	18.1	15.9	11.2	6.6	3.1	58	58	56	55
Qpe	T-DK-001	4	8	456.545	11	21	46.4607	2.89067	270	6.1	7.8	12	15.1	18.5	22.2	24.7	24.1	21.7	16.3	10.3	6.4	-1	-0.3	1.4	4.2	7.3	10.6	12.3	12	10.2	6.1	2.8	-0.2	2.6	3.7	6.7	9.6	12.9	16.4	18.5	18.1	15.9	11.2	6.6	3.1	58	58	56	55
Qpe	T-DK-001	5	8	480.25	4	21	46.4607	2.89067	270	6.1	7.8	12	15.1	18.5	22.2	24.7	24.1	21.7	16.3	10.3	6.4	-1	-0.3	1.4	4.2	7.3	10.6	12.3	12	10.2	6.1	2.8	-0.2	2.6	3.7	6.7	9.6	12.9	16.4	18.5	18.1	15.9	11.2	6.6	3.1	58	58	56	55
Qpe	T-DK-001	6	8	479.333	6	21	46.4607	2.89067	270	6.1	7.8	12	15.1	18.5	22.2	24.7	24.1	21.7	16.3	10.3	6.4	-1	-0.3	1.4	4.2	7.3	10.6	12.3	12	10.2	6.1	2.8	-0.2	2.6	3.7	6.7	9.6	12.9	16.4	18.5	18.1	15.9	11.2	6.6	3.1	58	58	56	55
Qpe	T-DK-001	3	8	438.35	10	26	51.948	-2.45	70	6.5	6.8	9.1	12.2	15.5	18.9	20.3	19.9	17.6	14.2	9.5	7.4	1.2	1.1	2.2	4.5	7.2	10.3	11.8	11.6	9.6	7.3	3.6	2.1	3.9	4	5.6	8.3	11.3	14.6	16.1	15.7	13.6	10.7	6.5	4.8	69	48	55	49
Qpe	T-DK-001	5	8	283.583	6	26	51.948	-2.45	70	6.5	6.8	9.1	12.2	15.5	18.9	20.3	19.9	17.6	14.2	9.5	7.4	1.2	1.1	2.2	4.5	7.2	10.3	11.8	11.6	9.6	7.3	3.6	2.1	3.9	4	5.6	8.3	11.3	14.6	16.1	15.7	13.6	10.7	6.5	4.8	69	48	55	49
Qpe	T-DK-001	6	8	480.571	7	26	51.948	-2.45	70	6.5	6.8	9.1	12.2	15.5	18.9	20.3	19.9	17.6	14.2	9.5	7.4	1.2	1.1	2.2	4.5	7.2	10.3	11.8	11.6	9.6	7.3	3.6	2.1	3.9	4	5.6	8.3	11.3	14.6	16.1	15.7	13.6	10.7	6.5	4.8	69	48	55	49
Qpe	T-DK-001	2	8	380.875	8	260	56.071	9.597	25	2.7	3.3	5.4	9.2	14.7	18	19.3	19.1	15.9	11.6	7.3	4.3	-5.4	-5.4	-2	2.8	7.6	11	12.9	11.7	9.3	5.6	1.1	0.2	-1.3	-1	1.7	6	11.1	14.5	16.1	15.4	12.6	8.6	4.2	2.2	59	41	47	43
Qpe	T-DK-001	3	8	424.417	6	260	56.071	9.597	25	2.7	3.3	5.4	9.2	14.7	18	19.3	19.1	15.9	11.6	7.3	4.3	-5.4	-5.4	-2	2.8	7.6	11	12.9	11.7	9.3	5.6	1.1	0.2	-1.3	-1	1.7	6	11.1	14.5	16.1	15.4	12.6	8.6	4.2	2.2	59	41	47	43
Qpe	T-DK-001	4	8	493.643	7	260	56.071	9.597	25	2.7	3.3	5.4	9.2	14.7	18	19.3	19.1	15.9	11.6	7.3	4.3	-5.4	-5.4	-2	2.8	7.6	11	12.9	11.7	9.3	5.6	1.1	0.2	-1.3	-1	1.7	6	11.1	14.5	16.1	15.4	12.6	8.6	4.2	2.2	59	41	47	43
Qpe	T-DK-001	5	8	491.167	3	260	56.071	9.597	25	2.7	3.3	5.4	9.2	14.7	18	19.3	19.1	15.9	11.6	7.3	4.3	-5.4	-5.4	-2	2.8	7.6	11	12.9	11.7	9.3	5.6	1.1	0.2	-1.3	-1	1.7	6	11.1	14.5	16.1	15.4	12.6	8.6	4.2	2.2	59	41	47	43
Qpe	T-DK-001	6	8	462.167	3	260	56.071	9.597	25	2.7	3.3	5.4	9.2	14.7	18	19.3	19.1	15.9	11.6	7.3	4.3	-5.4	-5.4	-2	2.8	7.6	11	12.9	11.7	9.3	5.6	1.1	0.2	-1.3	-1	1.7	6	11.1	14.5	16.1	15.4	12.6	8.6	4.2	2.2	59	41	47	43
Qpe	T-DK-001	2	8	434.15	10	263	53.707	9.762	10	2	3.1	6.7	11.8	17	20.3	21.5	21.4	18.6	13	7.3	3.7	-2.6	-2.5	-0.3	2.7	6.6	9.9	11.9	11.5	9	5.8	2.3	-0.8	-0.3	0.3	3.2	7.3	11.8	15.1	16.7	16.4	13.8	9.4	4.8	1.5	62	44	52	47
Qpe	T-DK-001	3	8	357.357	7	263	53.707	9.762	10	2	3.1	6.7	11.8	17	20.3	21.5	21.4	18.6	13	7.3	3.7	-2.6	-2.5	-0.3	2.7	6.6	9.9	11.9	11.5	9	5.8	2.3	-0.8	-0.3	0.3	3.2	7.3	11.8	15.1	16.7	16.4	13.8	9.4	4.8	1.5	62	44	52	47
Qpe	T-DK-001	4	8	478.05	10	263	53.707	9.762	10	2	3.1	6.7	11.8	17	20.3	21.5	21.4	18.6	13	7.3	3.7	-2.6	-2.5	-0.3	2.7	6.6	9.9	11.9	11.5	9	5.8	2.3	-0.8	-0.3	0.3	3.2	7.3	11.8	15.1	16.7	16.4	13.8	9.4	4.8	1.5	62	44	52	47
Qpe	T-DK-001	5	8	415.625	4	263	53.707	9.762	10	2	3.1	6.7	11.8	17	20.3	21.5	21.4	18.6	13	7.3	3.7	-2.6	-2.5	-0.3	2.7	6.6	9.9	11.9	11.5	9	5.8	2.3	-0.8	-0.3	0.3	3.2	7.3	11.8	15.1	16.7	16.4	13.8	9.4	4.8	1.5	62	44	52	47
Qpe	T-DK-001	6	8	386.333	6	263	53.707	9.762	10	2	3.1	6.7	11.8	17	20.3	21.5	21.4	18.6	13	7.3	3.7	-2.6	-2.5	-0.3	2.7	6.6	9.9	11.9	11.5	9	5.8	2.3	-0.8	-0.3	0.3	3.2	7.3	11.8	15.1	16.7	16.4	13.8	9.4	4.8	1.5	62	44	52	47
Qpe	T-DK-001	2	8	406	5	277	40.917	31.667	1200	2.1	3.8	8.1	12.7	17.1	20.7	22.8	23	20.4	14.9	10.3	4.2	-4.5	-3.4	-1.1	2.7	6.5	9.2	11.4	11.1	8.7	5	1.6	-2	-1.2	0.2	3.5	7.7	11.8	14.9	17.1	17	14.6	10	6	1.1	87	69	68	67
Qpe	T-DK-001	3	8	433.8	5	277	40.917	31.667	1200	2.1	3.8	8.1	12.7	17.1	20.7	22.8	23	20.4	14.9	10.3	4.2	-4.5	-3.4	-1.1	2.7	6.5	9.2	11.4	11.1	8.7	5	1.6	-2	-1.2	0.2	3.5	7.7	11.8	14.9	17.1	17	14.6	10	6	1.1	87	69	68	67
Qpe	T-DK-001	4	8	390.643	7	277	40.917	31.667	1200	2.1	3.8	8.1	12.7	17.1	20.7	22.8	23	20.4	14.9	10.3	4.2	-4.5	-3.4	-1.1	2.7	6.5	9.2	11.4	11.1	8.7	5	1.6	-2	-1.2	0.2	3.5	7.7	11.8	14.9	17.1	17	14.6	10	6	1.1	87	69	68	67
Qpe	T-DK-001	2	8	416.643	7	31	52.8327	10.317	110	2	3.1	7.1	12.2	17.7	21	22.3	22	18.5	13	7	3.3	-3.1	-3	-0.8	2.4	6.3	9.6	11.7	11.2	8.5	5.2	1.8	-1.6	-0.6	0	3.1	7.3	12	15.3	17	16.6	13.5	9.1	4.4	0.8	53	42	47	50
Qpe	T-DK-001	3	8	526.278	9	31	52.8327	10.317	110	2	3.1	7.1	12.2	17.7	21	22.3	22	18.5	13	7	3.3	-3.1	-3	-0.8	2.4	6.3	9.6	11.7	11.2	8.5	5.2	1.8	-1.6	-0.6	0	3.1	7.3	12	15.3	17	16.6	13.5	9.1	4.4	0.8	53	42	47	50
Qpe	T-DK-001	4	8	477.95	10	31	52.8327	10.317	110	2	3.1	7.1	12.2	17.7	21	22.3	22	18.5	13	7	3.3	-3.1	-3	-0.8	2.4	6.3	9.6	11.7	11.2	8.5	5.2	1.8	-1.6	-0.6	0	3.1	7.3	12	15.3	17	16.6	13.5	9.1	4.4	0.8	53	42	47	50
Qpe	T-DK-001	6	8	531.5	1	31	52.8327	10.317	110	2	3.1	7.1	12.2	17.7	21	22.3	22	18.5	13	7	3.3	-3.1	-3	-0.8	2.4	6.3	9.6	11.7	11.2	8.5	5.2	1.8	-1.6	-0.6	0	3.1	7.3	12	15.3	17	16.6	13.5	9.1	4.4	0.8	53	42	47	50
Qpe	T-DK-001	2	8	404.2	10	33	51.1827	17.9313	210	-0.2	1.5	6.7	13	18.2	21.7	22.8	22.6	18.6	13.6	6.9	2.1	-5.7	-4.5	-0.9	3	7.4	10.9	12	11.6	8.8	4.7	1	-3.1	-3	-1.5	2.9	8	12.8	16.3	17.4	17.1	13.7	9.1	4	-0.5	31	28	29	37
Qpe	T-DK-001	3	8	472.062	8	33	51.1827	17.9313	210	-0.2	1.5	6.7	13	18.2	21.7	22.8	22.6	18.6	13.6	6.9	2.1	-5.7	-4.5	-0.9	3	7.4	10.9	12	11.6	8.8	4.7	1	-3.1	-3	-1.5	2.9	8	12.8	16.3	17.4	17.1	13.7	9.1	4	-0.5	31	28	29	37
Qpe	T-DK-001	4	8	412.357	7	33	51.1827	17.9313	210	-0.2	1.5	6.7	13	18.2	21.7	22.8	22.6	18.6	13.6	6.9	2.1	-5.7	-4.5	-0.9	3	7.4	10.9	12	11.6	8.8	4.7	1	-3.1	-3	-1.5	2.9	8	12.8	16.3	17.4	17.1	13.7	9.1	4	-0.5	31	28	29	37
Qpe	T-DK-001	5	8	446.5	1	33	51.1827	17.9313	210	-0.2	1.5	6.7	13	18.2	21.7	22.8	22.6	18.6	13.6	6.9	2.1	-5.7	-4.5	-0.9	3	7.4	10.9	12	11.6	8.8	4.7	1	-3.1	-3	-1.5	2.9	8	12.8	16.3	17.4	17.1	13.7	9.1	4	-0.5	31	28	29	37
Qpe	T-DK-001	2	8	415.222	9	4	47.8091	0.390286	156.75	6.2	7.6	11.4	14.8	18.1	21.9	24.1	23.6	20.9	15.8	10.1	6.5	0.1	0.6	2.2	4.7	7.6	10.8	12.6	12.3	10.3	6.8	3.5	0.9	3.1	4.1	6.8	9.8	12.8	16.3	18.3	17.9	15.6	11.3	6.8	3.7	68	61	57	53
Qpe	T-DK-001	3	8	393	2	4	47.8091	0.390286	156.75	6.2	7.6	11.4	14.8	18.1	21.9	24.1	23.6	20.9	15.8	10.1	6.5	0.1	0.6	2.2	4.7	7.6	10.8	12.6	12.3	10.3	6.8	3.5	0.9	3.1	4.1	6.8	9.8	12.8	16.3	18.3	17.9	15.6	11.3	6.8	3.7	68	61	57	53
Qpe	T-DK-001	6	8	544.778	9	4	47.8091	0.390286	156.75	6.2	7.6	11.4	14.8	18.1	21.9	24.1	23.6	20.9	15.8	10.1	6.5	0.1	0.6	2.2	4.7	7.6	10.8	12.6	12.3	10.3	6.8	3.5	0.9	3.1	4.1	6.8	9.8	12.8	16.3	18.3	17.9	15.6	11.3	6.8	3.7	68	61	57	53
Qpe	T-DK-001	2	8	410.944	9	41	56.1315	9.396	250	1.3	1.9	4.1	7.8	13.6	16.9	17.9	18.1	14.6	10.5	6	2.9	-6	-6	-2.9	1.3	6.1	9.4	11	10.2	7.8	4.5	-0.4	-0.8	-2.4	-2	0.6	4.6	9.8	13.1	14.5	14.1	11.2	7.5	2.8	1.1	61	42	47	47
Qpe	T-DK-001	3	8	342.833	3	41	56.1315	9.396	250	1.3	1.9	4.1	7.8	13.6	16.9	17.9	18.1	14.6	10.5	6	2.9	-6	-6	-2.9	1.3	6.1	9.4	11	10.2	7.8	4.5	-0.4	-0.8	-2.4	-2	0.6	4.6	9.8	13.1	14.5	14.1	11.2	7.5	2.8	1.1	61	42	47	47
Qpe	T-DK-001	4	8	526	8	41	56.1315	9.396	250	1.3	1.9	4.1	7.8	13.6	16.9	17.9	18.1	14.6	10.5	6	2.9	-6	-6	-2.9	1.3	6.1	9.4	11	10.2	7.8	4.5	-0.4	-0.8	-2.4	-2	0.6	4.6	9.8	13.1	14.5	14.1	11.2	7.5	2.8	1.1	61	42	47	47
Qpe	T-DK-001	5	8	463.818	11	41	56.1315	9.396	250	1.3	1.9	4.1	7.8	13.6	16.9	17.9	18.1	14.6	10.5	6	2.9	-6	-6	-2.9	1.3	6.1	9.4	11	10.2	7.8	4.5	-0.4	-0.8	-2.4	-2	0.6	4.6	9.8	13.1	14.5	14.1	11.2	7.5	2.8	1.1	61	42	47	47
Qpe	T-DK-001	6	8	358.5	7	41	56.1315	9.396	250	1.3	1.9	4.1	7.8	13.6	16.9	17.9	18.1	14.6	10.5	6	2.9	-6	-6	-2.9	1.3	6.1	9.4	11	10.2	7.8	4.5	-0.4	-0.8	-2.4	-2	0.6	4.6	9.8	13.1	14.5	14.1	11.2	7.5	2.8	1.1	61	42	47	47
Qpe	T-DK-001	2	8	530.357	7	50	46.604	0.178	130	6.9	8.3	12.3	15.4	18.5	22.5	24.6	24.1	21.8	16.6	11	7.3	0.6	1.2	2.8	5.3	8	11.4	13.2	12.8	11.1	7.4	4.1	1.3	3.7	4.7	7.5	10.3	13.2	16.9	18.9	18.5	16.4	12	7.5	4.3	70	62	57	53
Qpe	T-DK-001	3	8	377	6	50	46.604	0.178	130	6.9	8.3	12.3	15.4	18.5	22.5	24.6	24.1	21.8	16.6	11	7.3	0.6	1.2	2.8	5.3	8	11.4	13.2	12.8	11.1	7.4	4.1	1.3	3.7	4.7	7.5	10.3	13.2	16.9	18.9	18.5	16.4	12	7.5	4.3	70	62	57	53
Qpe	T-DK-001	4	8	490.333	3	50	46.604	0.178	130	6.9	8.3	12.3	15.4	18.5	22.5	24.6	24.1	21.8	16.6	11	7.3	0.6	1.2	2.8	5.3	8	11.4	13.2	12.8	11.1	7.4	4.1	1.3	3.7	4.7	7.5	10.3	13.2	16.9	18.9	18.5	16.4	12	7.5	4.3	70	62	57	53
Qpe	T-DK-001	5	8	434.25	8	50	46.604	0.178	130	6.9	8.3	12.3	15.4	18.5	22.5	24.6	24.1	21.8	16.6	11	7.3	0.6	1.2	2.8	5.3	8	11.4	13.2	12.8	11.1	7.4	4.1	1.3	3.7	4.7	7.5	10.3	13.2	16.9	18.9	18.5	16.4	12	7.5	4.3	70	62	57	53
Qpe	T-DK-001	6	8	450.95	10	50	46.604	0.178	130	6.9	8.3	12.3	15.4	18.5	22.5	24.6	24.1	21.8	16.6	11	7.3	0.6	1.2	2.8	5.3	8	11.4	13.2	12.8	11.1	7.4	4.1	1.3	3.7	4.7	7.5	10.3	13.2	16.9	18.9	18.5	16.4	12	7.5	4.3	70	62	57	53
Qpe	T-DK-001	2	8	347.636	11	61	51.769	7.174	75	3.9	5	8.3	12.8	17.4	20.5	21.9	21.5	18.9	14.4	7.9	4.9	-0.9	-0.6	1.6	4.1	7.9	10.8	12.5	12	9.7	6.8	2.8	0.2	1.5	2.2	5	8.5	12.7	15.7	17.2	16.7	14.3	10.6	5.4	2.5	71	49	64	55
Qpe	T-DK-001	3	8	341.071	7	61	51.769	7.174	75	3.9	5	8.3	12.8	17.4	20.5	21.9	21.5	18.9	14.4	7.9	4.9	-0.9	-0.6	1.6	4.1	7.9	10.8	12.5	12	9.7	6.8	2.8	0.2	1.5	2.2	5	8.5	12.7	15.7	17.2	16.7	14.3	10.6	5.4	2.5	71	49	64	55
Qpe	T-DK-001	4	8	374.444	9	61	51.769	7.174	75	3.9	5	8.3	12.8	17.4	20.5	21.9	21.5	18.9	14.4	7.9	4.9	-0.9	-0.6	1.6	4.1	7.9	10.8	12.5	12	9.7	6.8	2.8	0.2	1.5	2.2	5	8.5	12.7	15.7	17.2	16.7	14.3	10.6	5.4	2.5	71	49	64	55
Qpe	T-DK-001	5	8	462.812	8	61	51.769	7.174	75	3.9	5	8.3	12.8	17.4	20.5	21.9	21.5	18.9	14.4	7.9	4.9	-0.9	-0.6	1.6	4.1	7.9	10.8	12.5	12	9.7	6.8	2.8	0.2	1.5	2.2	5	8.5	12.7	15.7	17.2	16.7	14.3	10.6	5.4	2.5	71	49	64	55
Qpe	T-DK-001	6	8	475.636	11	61	51.769	7.174	75	3.9	5	8.3	12.8	17.4	20.5	21.9	21.5	18.9	14.4	7.9	4.9	-0.9	-0.6	1.6	4.1	7.9	10.8	12.5	12	9.7	6.8	2.8	0.2	1.5	2.2	5	8.5	12.7	15.7	17.2	16.7	14.3	10.6	5.4	2.5	71	49	64	55
Qpe	T-DK-001	2	8	409.167	9	77	47.761	5.487	330	3.4	5.3	10	14.1	17.8	21.1	23.4	22.9	20.1	14.5	8.2	3.9	-1.8	-1.3	1.3	4.4	7.7	11.1	12.9	12.5	10.4	6.2	2	-0.9	0.8	2	5.6	9.2	12.7	16.1	18.1	17.7	15.3	10.4	5.1	1.5	83	71	72	56
Qpe	T-DK-001	3	8	453.583	6	77	47.761	5.487	330	3.4	5.3	10	14.1	17.8	21.1	23.4	22.9	20.1	14.5	8.2	3.9	-1.8	-1.3	1.3	4.4	7.7	11.1	12.9	12.5	10.4	6.2	2	-0.9	0.8	2	5.6	9.2	12.7	16.1	18.1	17.7	15.3	10.4	5.1	1.5	83	71	72	56
Qpe	T-DK-001	4	8	518.312	8	77	47.761	5.487	330	3.4	5.3	10	14.1	17.8	21.1	23.4	22.9	20.1	14.5	8.2	3.9	-1.8	-1.3	1.3	4.4	7.7	11.1	12.9	12.5	10.4	6.2	2	-0.9	0.8	2	5.6	9.2	12.7	16.1	18.1	17.7	15.3	10.4	5.1	1.5	83	71	72	56
Qpe	T-DK-001	5	8	463.312	8	77	47.761	5.487	330	3.4	5.3	10	14.1	17.8	21.1	23.4	22.9	20.1	14.5	8.2	3.9	-1.8	-1.3	1.3	4.4	7.7	11.1	12.9	12.5	10.4	6.2	2	-0.9	0.8	2	5.6	9.2	12.7	16.1	18.1	17.7	15.3	10.4	5.1	1.5	83	71	72	56
Qpe	T-DK-001	6	8	481.722	9	77	47.761	5.487	330	3.4	5.3	10	14.1	17.8	21.1	23.4	22.9	20.1	14.5	8.2	3.9	-1.8	-1.3	1.3	4.4	7.7	11.1	12.9	12.5	10.4	6.2	2	-0.9	0.8	2	5.6	9.2	12.7	16.1	18.1	17.7	15.3	10.4	5.1	1.5	83	71	72	56
Qpe	T-DK-001	2	8	453.8	10	87	49.361	7.872	470	1.1	3.3	7.3	12	16.1	19.9	21.3	20.4	18.6	13	6.2	3	-3.8	-3.2	-0.9	2.4	5.9	9.4	10.9	10.5	8.2	4.6	0.4	-2.2	-1.4	0	3.2	7.2	11	14.6	16.1	15.4	13.4	8.8	3.3	0.4	63	54	51	52
Qpe	T-DK-001	3	8	518.15	10	87	49.361	7.872	470	1.1	3.3	7.3	12	16.1	19.9	21.3	20.4	18.6	13	6.2	3	-3.8	-3.2	-0.9	2.4	5.9	9.4	10.9	10.5	8.2	4.6	0.4	-2.2	-1.4	0	3.2	7.2	11	14.6	16.1	15.4	13.4	8.8	3.3	0.4	63	54	51	52
Qpe	T-DK-001	4	8	537	9	87	49.361	7.872	470	1.1	3.3	7.3	12	16.1	19.9	21.3	20.4	18.6	13	6.2	3	-3.8	-3.2	-0.9	2.4	5.9	9.4	10.9	10.5	8.2	4.6	0.4	-2.2	-1.4	0	3.2	7.2	11	14.6	16.1	15.4	13.4	8.8	3.3	0.4	63	54	51	52
Qpe	T-DK-001	5	8	389.5	1	87	49.361	7.872	470	1.1	3.3	7.3	12	16.1	19.9	21.3	20.4	18.6	13	6.2	3	-3.8	-3.2	-0.9	2.4	5.9	9.4	10.9	10.5	8.2	4.6	0.4	-2.2	-1.4	0	3.2	7.2	11	14.6	16.1	15.4	13.4	8.8	3.3	0.4	63	54	51	52
Qpe	T-DK-001	6	8	533.143	7	87	49.361	7.872	470	1.1	3.3	7.3	12	16.1	19.9	21.3	20.4	18.6	13	6.2	3	-3.8	-3.2	-0.9	2.4	5.9	9.4	10.9	10.5	8.2	4.6	0.4	-2.2	-1.4	0	3.2	7.2	11	14.6	16.1	15.4	13.4	8.8	3.3	0.4	63	54	51	52
Qpe	T-DK-002	2	8	338	1	1	51.7942	-2.4895	90.6667	6.4	6.6	8.9	12.2	15.4	18.9	20.4	19.9	17.5	13.9	9.3	7.3	1.1	1	2	4.4	7.1	10.3	11.8	11.6	9.5	7.1	3.4	1.9	3.8	3.8	5.5	8.3	11.3	14.6	16.1	15.7	13.5	10.5	6.4	4.6	81	56	64	54
Qpe	T-DK-002	3	8	286.514	7	1	51.7942	-2.4895	90.6667	6.4	6.6	8.9	12.2	15.4	18.9	20.4	19.9	17.5	13.9	9.3	7.3	1.1	1	2	4.4	7.1	10.3	11.8	11.6	9.5	7.1	3.4	1.9	3.8	3.8	5.5	8.3	11.3	14.6	16.1	15.7	13.5	10.5	6.4	4.6	81	56	64	54
Qpe	T-DK-002	3	8	220.041	32	21	46.4607	2.89067	270	6.1	7.8	12	15.1	18.5	22.2	24.7	24.1	21.7	16.3	10.3	6.4	-1	-0.3	1.4	4.2	7.3	10.6	12.3	12	10.2	6.1	2.8	-0.2	2.6	3.7	6.7	9.6	12.9	16.4	18.5	18.1	15.9	11.2	6.6	3.1	58	58	56	55
Qpe	T-DK-002	4	8	406.878	27	21	46.4607	2.89067	270	6.1	7.8	12	15.1	18.5	22.2	24.7	24.1	21.7	16.3	10.3	6.4	-1	-0.3	1.4	4.2	7.3	10.6	12.3	12	10.2	6.1	2.8	-0.2	2.6	3.7	6.7	9.6	12.9	16.4	18.5	18.1	15.9	11.2	6.6	3.1	58	58	56	55
Qpe	T-DK-002	1	8	340.357	21	26	51.948	-2.45	70	6.5	6.8	9.1	12.2	15.5	18.9	20.3	19.9	17.6	14.2	9.5	7.4	1.2	1.1	2.2	4.5	7.2	10.3	11.8	11.6	9.6	7.3	3.6	2.1	3.9	4	5.6	8.3	11.3	14.6	16.1	15.7	13.6	10.7	6.5	4.8	69	48	55	49
Qpe	T-DK-002	3	8	276.459	32	26	51.948	-2.45	70	6.5	6.8	9.1	12.2	15.5	18.9	20.3	19.9	17.6	14.2	9.5	7.4	1.2	1.1	2.2	4.5	7.2	10.3	11.8	11.6	9.6	7.3	3.6	2.1	3.9	4	5.6	8.3	11.3	14.6	16.1	15.7	13.6	10.7	6.5	4.8	69	48	55	49
Qpe	T-DK-002	4	8	379.714	29	26	51.948	-2.45	70	6.5	6.8	9.1	12.2	15.5	18.9	20.3	19.9	17.6	14.2	9.5	7.4	1.2	1.1	2.2	4.5	7.2	10.3	11.8	11.6	9.6	7.3	3.6	2.1	3.9	4	5.6	8.3	11.3	14.6	16.1	15.7	13.6	10.7	6.5	4.8	69	48	55	49
Qpe	T-DK-002	3	8	170.184	19	260	56.071	9.597	25	2.7	3.3	5.4	9.2	14.7	18	19.3	19.1	15.9	11.6	7.3	4.3	-5.4	-5.4	-2	2.8	7.6	11	12.9	11.7	9.3	5.6	1.1	0.2	-1.3	-1	1.7	6	11.1	14.5	16.1	15.4	12.6	8.6	4.2	2.2	59	41	47	43
Qpe	T-DK-002	4	8	389.575	28	260	56.071	9.597	25	2.7	3.3	5.4	9.2	14.7	18	19.3	19.1	15.9	11.6	7.3	4.3	-5.4	-5.4	-2	2.8	7.6	11	12.9	11.7	9.3	5.6	1.1	0.2	-1.3	-1	1.7	6	11.1	14.5	16.1	15.4	12.6	8.6	4.2	2.2	59	41	47	43
Qpe	T-DK-002	1	8	309.505	19	263	53.707	9.762	10	2	3.1	6.7	11.8	17	20.3	21.5	21.4	18.6	13	7.3	3.7	-2.6	-2.5	-0.3	2.7	6.6	9.9	11.9	11.5	9	5.8	2.3	-0.8	-0.3	0.3	3.2	7.3	11.8	15.1	16.7	16.4	13.8	9.4	4.8	1.5	62	44	52	47
Qpe	T-DK-002	2	8	316.743	21	263	53.707	9.762	10	2	3.1	6.7	11.8	17	20.3	21.5	21.4	18.6	13	7.3	3.7	-2.6	-2.5	-0.3	2.7	6.6	9.9	11.9	11.5	9	5.8	2.3	-0.8	-0.3	0.3	3.2	7.3	11.8	15.1	16.7	16.4	13.8	9.4	4.8	1.5	62	44	52	47
Qpe	T-DK-002	3	8	303.087	39	263	53.707	9.762	10	2	3.1	6.7	11.8	17	20.3	21.5	21.4	18.6	13	7.3	3.7	-2.6	-2.5	-0.3	2.7	6.6	9.9	11.9	11.5	9	5.8	2.3	-0.8	-0.3	0.3	3.2	7.3	11.8	15.1	16.7	16.4	13.8	9.4	4.8	1.5	62	44	52	47
Qpe	T-DK-002	4	8	314.314	22	263	53.707	9.762	10	2	3.1	6.7	11.8	17	20.3	21.5	21.4	18.6	13	7.3	3.7	-2.6	-2.5	-0.3	2.7	6.6	9.9	11.9	11.5	9	5.8	2.3	-0.8	-0.3	0.3	3.2	7.3	11.8	15.1	16.7	16.4	13.8	9.4	4.8	1.5	62	44	52	47
Qpe	T-DK-002	2	8	107.655	11	277	40.917	31.667	1200	2.1	3.8	8.1	12.7	17.1	20.7	22.8	23	20.4	14.9	10.3	4.2	-4.5	-3.4	-1.1	2.7	6.5	9.2	11.4	11.1	8.7	5	1.6	-2	-1.2	0.2	3.5	7.7	11.8	14.9	17.1	17	14.6	10	6	1.1	87	69	68	67
Qpe	T-DK-002	3	8	208.438	13	277	40.917	31.667	1200	2.1	3.8	8.1	12.7	17.1	20.7	22.8	23	20.4	14.9	10.3	4.2	-4.5	-3.4	-1.1	2.7	6.5	9.2	11.4	11.1	8.7	5	1.6	-2	-1.2	0.2	3.5	7.7	11.8	14.9	17.1	17	14.6	10	6	1.1	87	69	68	67
Qpe	T-DK-002	4	8	371.625	8	277	40.917	31.667	1200	2.1	3.8	8.1	12.7	17.1	20.7	22.8	23	20.4	14.9	10.3	4.2	-4.5	-3.4	-1.1	2.7	6.5	9.2	11.4	11.1	8.7	5	1.6	-2	-1.2	0.2	3.5	7.7	11.8	14.9	17.1	17	14.6	10	6	1.1	87	69	68	67
Qpe	T-DK-002	1	8	323.445	11	31	52.8327	10.317	110	2	3.1	7.1	12.2	17.7	21	22.3	22	18.5	13	7	3.3	-3.1	-3	-0.8	2.4	6.3	9.6	11.7	11.2	8.5	5.2	1.8	-1.6	-0.6	0	3.1	7.3	12	15.3	17	16.6	13.5	9.1	4.4	0.8	53	42	47	50
Qpe	T-DK-002	2	8	290.337	32	31	52.8327	10.317	110	2	3.1	7.1	12.2	17.7	21	22.3	22	18.5	13	7	3.3	-3.1	-3	-0.8	2.4	6.3	9.6	11.7	11.2	8.5	5.2	1.8	-1.6	-0.6	0	3.1	7.3	12	15.3	17	16.6	13.5	9.1	4.4	0.8	53	42	47	50
Qpe	T-DK-002	3	8	252.182	22	31	52.8327	10.317	110	2	3.1	7.1	12.2	17.7	21	22.3	22	18.5	13	7	3.3	-3.1	-3	-0.8	2.4	6.3	9.6	11.7	11.2	8.5	5.2	1.8	-1.6	-0.6	0	3.1	7.3	12	15.3	17	16.6	13.5	9.1	4.4	0.8	53	42	47	50
Qpe	T-DK-002	4	8	397.697	34	31	52.8327	10.317	110	2	3.1	7.1	12.2	17.7	21	22.3	22	18.5	13	7	3.3	-3.1	-3	-0.8	2.4	6.3	9.6	11.7	11.2	8.5	5.2	1.8	-1.6	-0.6	0	3.1	7.3	12	15.3	17	16.6	13.5	9.1	4.4	0.8	53	42	47	50
Qpe	T-DK-002	2	8	221.62	20	33	51.1827	17.9313	210	-0.2	1.5	6.7	13	18.2	21.7	22.8	22.6	18.6	13.6	6.9	2.1	-5.7	-4.5	-0.9	3	7.4	10.9	12	11.6	8.8	4.7	1	-3.1	-3	-1.5	2.9	8	12.8	16.3	17.4	17.1	13.7	9.1	4	-0.5	31	28	29	37
Qpe	T-DK-002	3	8	274.879	24	33	51.1827	17.9313	210	-0.2	1.5	6.7	13	18.2	21.7	22.8	22.6	18.6	13.6	6.9	2.1	-5.7	-4.5	-0.9	3	7.4	10.9	12	11.6	8.8	4.7	1	-3.1	-3	-1.5	2.9	8	12.8	16.3	17.4	17.1	13.7	9.1	4	-0.5	31	28	29	37
Qpe	T-DK-002	4	8	312.968	41	33	51.1827	17.9313	210	-0.2	1.5	6.7	13	18.2	21.7	22.8	22.6	18.6	13.6	6.9	2.1	-5.7	-4.5	-0.9	3	7.4	10.9	12	11.6	8.8	4.7	1	-3.1	-3	-1.5	2.9	8	12.8	16.3	17.4	17.1	13.7	9.1	4	-0.5	31	28	29	37
Qpe	T-DK-002	3	8	194.383	12	4	47.8091	0.390286	156.75	6.2	7.6	11.4	14.8	18.1	21.9	24.1	23.6	20.9	15.8	10.1	6.5	0.1	0.6	2.2	4.7	7.6	10.8	12.6	12.3	10.3	6.8	3.5	0.9	3.1	4.1	6.8	9.8	12.8	16.3	18.3	17.9	15.6	11.3	6.8	3.7	68	61	57	53
Qpe	T-DK-002	4	8	408.355	22	4	47.8091	0.390286	156.75	6.2	7.6	11.4	14.8	18.1	21.9	24.1	23.6	20.9	15.8	10.1	6.5	0.1	0.6	2.2	4.7	7.6	10.8	12.6	12.3	10.3	6.8	3.5	0.9	3.1	4.1	6.8	9.8	12.8	16.3	18.3	17.9	15.6	11.3	6.8	3.7	68	61	57	53
Qpe	T-DK-002	3	8	300.67	33	41	56.1315	9.396	250	1.3	1.9	4.1	7.8	13.6	16.9	17.9	18.1	14.6	10.5	6	2.9	-6	-6	-2.9	1.3	6.1	9.4	11	10.2	7.8	4.5	-0.4	-0.8	-2.4	-2	0.6	4.6	9.8	13.1	14.5	14.1	11.2	7.5	2.8	1.1	61	42	47	47
Qpe	T-DK-002	4	8	332.436	22	41	56.1315	9.396	250	1.3	1.9	4.1	7.8	13.6	16.9	17.9	18.1	14.6	10.5	6	2.9	-6	-6	-2.9	1.3	6.1	9.4	11	10.2	7.8	4.5	-0.4	-0.8	-2.4	-2	0.6	4.6	9.8	13.1	14.5	14.1	11.2	7.5	2.8	1.1	61	42	47	47
Qpe	T-DK-002	1	8	340.46	15	50	46.604	0.178	130	6.9	8.3	12.3	15.4	18.5	22.5	24.6	24.1	21.8	16.6	11	7.3	0.6	1.2	2.8	5.3	8	11.4	13.2	12.8	11.1	7.4	4.1	1.3	3.7	4.7	7.5	10.3	13.2	16.9	18.9	18.5	16.4	12	7.5	4.3	70	62	57	53
Qpe	T-DK-002	3	8	216.452	25	50	46.604	0.178	130	6.9	8.3	12.3	15.4	18.5	22.5	24.6	24.1	21.8	16.6	11	7.3	0.6	1.2	2.8	5.3	8	11.4	13.2	12.8	11.1	7.4	4.1	1.3	3.7	4.7	7.5	10.3	13.2	16.9	18.9	18.5	16.4	12	7.5	4.3	70	62	57	53
Qpe	T-DK-002	4	8	293.083	18	50	46.604	0.178	130	6.9	8.3	12.3	15.4	18.5	22.5	24.6	24.1	21.8	16.6	11	7.3	0.6	1.2	2.8	5.3	8	11.4	13.2	12.8	11.1	7.4	4.1	1.3	3.7	4.7	7.5	10.3	13.2	16.9	18.9	18.5	16.4	12	7.5	4.3	70	62	57	53
Qpe	T-DK-002	1	8	357.545	20	61	51.769	7.174	75	3.9	5	8.3	12.8	17.4	20.5	21.9	21.5	18.9	14.4	7.9	4.9	-0.9	-0.6	1.6	4.1	7.9	10.8	12.5	12	9.7	6.8	2.8	0.2	1.5	2.2	5	8.5	12.7	15.7	17.2	16.7	14.3	10.6	5.4	2.5	71	49	64	55
Qpe	T-DK-002	2	8	317.133	21	61	51.769	7.174	75	3.9	5	8.3	12.8	17.4	20.5	21.9	21.5	18.9	14.4	7.9	4.9	-0.9	-0.6	1.6	4.1	7.9	10.8	12.5	12	9.7	6.8	2.8	0.2	1.5	2.2	5	8.5	12.7	15.7	17.2	16.7	14.3	10.6	5.4	2.5	71	49	64	55
Qpe	T-DK-002	3	8	366.574	27	61	51.769	7.174	75	3.9	5	8.3	12.8	17.4	20.5	21.9	21.5	18.9	14.4	7.9	4.9	-0.9	-0.6	1.6	4.1	7.9	10.8	12.5	12	9.7	6.8	2.8	0.2	1.5	2.2	5	8.5	12.7	15.7	17.2	16.7	14.3	10.6	5.4	2.5	71	49	64	55
Qpe	T-DK-002	4	8	291.39	31	61	51.769	7.174	75	3.9	5	8.3	12.8	17.4	20.5	21.9	21.5	18.9	14.4	7.9	4.9	-0.9	-0.6	1.6	4.1	7.9	10.8	12.5	12	9.7	6.8	2.8	0.2	1.5	2.2	5	8.5	12.7	15.7	17.2	16.7	14.3	10.6	5.4	2.5	71	49	64	55
Qpe	T-DK-002	3	8	233.384	19	77	47.761	5.487	330	3.4	5.3	10	14.1	17.8	21.1	23.4	22.9	20.1	14.5	8.2	3.9	-1.8	-1.3	1.3	4.4	7.7	11.1	12.9	12.5	10.4	6.2	2	-0.9	0.8	2	5.6	9.2	12.7	16.1	18.1	17.7	15.3	10.4	5.1	1.5	83	71	72	56
Qpe	T-DK-002	4	8	256.479	14	77	47.761	5.487	330	3.4	5.3	10	14.1	17.8	21.1	23.4	22.9	20.1	14.5	8.2	3.9	-1.8	-1.3	1.3	4.4	7.7	11.1	12.9	12.5	10.4	6.2	2	-0.9	0.8	2	5.6	9.2	12.7	16.1	18.1	17.7	15.3	10.4	5.1	1.5	83	71	72	56
Qpe	T-DK-002	1	8	282.37	10	87	49.361	7.872	470	1.1	3.3	7.3	12	16.1	19.9	21.3	20.4	18.6	13	6.2	3	-3.8	-3.2	-0.9	2.4	5.9	9.4	10.9	10.5	8.2	4.6	0.4	-2.2	-1.4	0	3.2	7.2	11	14.6	16.1	15.4	13.4	8.8	3.3	0.4	63	54	51	52
Qpe	T-DK-002	2	8	379.685	13	87	49.361	7.872	470	1.1	3.3	7.3	12	16.1	19.9	21.3	20.4	18.6	13	6.2	3	-3.8	-3.2	-0.9	2.4	5.9	9.4	10.9	10.5	8.2	4.6	0.4	-2.2	-1.4	0	3.2	7.2	11	14.6	16.1	15.4	13.4	8.8	3.3	0.4	63	54	51	52
Qpe	T-DK-002	3	8	260.464	22	87	49.361	7.872	470	1.1	3.3	7.3	12	16.1	19.9	21.3	20.4	18.6	13	6.2	3	-3.8	-3.2	-0.9	2.4	5.9	9.4	10.9	10.5	8.2	4.6	0.4	-2.2	-1.4	0	3.2	7.2	11	14.6	16.1	15.4	13.4	8.8	3.3	0.4	63	54	51	52
Qpe	T-DK-002	4	8	356.087	30	87	49.361	7.872	470	1.1	3.3	7.3	12	16.1	19.9	21.3	20.4	18.6	13	6.2	3	-3.8	-3.2	-0.9	2.4	5.9	9.4	10.9	10.5	8.2	4.6	0.4	-2.2	-1.4	0	3.2	7.2	11	14.6	16.1	15.4	13.4	8.8	3.3	0.4	63	54	51	52
Qpe	T-DK-003	1	8	470	12	1	51.7942	-2.4895	90.6667	6.4	6.6	8.9	12.2	15.4	18.9	20.4	19.9	17.5	13.9	9.3	7.3	1.1	1	2	4.4	7.1	10.3	11.8	11.6	9.5	7.1	3.4	1.9	3.8	3.8	5.5	8.3	11.3	14.6	16.1	15.7	13.5	10.5	6.4	4.6	81	56	64	54
Qpe	T-DK-003	2	8	497.461	32	1	51.7942	-2.4895	90.6667	6.4	6.6	8.9	12.2	15.4	18.9	20.4	19.9	17.5	13.9	9.3	7.3	1.1	1	2	4.4	7.1	10.3	11.8	11.6	9.5	7.1	3.4	1.9	3.8	3.8	5.5	8.3	11.3	14.6	16.1	15.7	13.5	10.5	6.4	4.6	81	56	64	54
Qpe	T-DK-003	3	8	497.974	29	1	51.7942	-2.4895	90.6667	6.4	6.6	8.9	12.2	15.4	18.9	20.4	19.9	17.5	13.9	9.3	7.3	1.1	1	2	4.4	7.1	10.3	11.8	11.6	9.5	7.1	3.4	1.9	3.8	3.8	5.5	8.3	11.3	14.6	16.1	15.7	13.5	10.5	6.4	4.6	81	56	64	54
Qpe	T-DK-003	4	8	447.74	26	1	51.7942	-2.4895	90.6667	6.4	6.6	8.9	12.2	15.4	18.9	20.4	19.9	17.5	13.9	9.3	7.3	1.1	1	2	4.4	7.1	10.3	11.8	11.6	9.5	7.1	3.4	1.9	3.8	3.8	5.5	8.3	11.3	14.6	16.1	15.7	13.5	10.5	6.4	4.6	81	56	64	54
Qpe	T-DK-003	1	8	385.227	11	21	46.4607	2.89067	270	6.1	7.8	12	15.1	18.5	22.2	24.7	24.1	21.7	16.3	10.3	6.4	-1	-0.3	1.4	4.2	7.3	10.6	12.3	12	10.2	6.1	2.8	-0.2	2.6	3.7	6.7	9.6	12.9	16.4	18.5	18.1	15.9	11.2	6.6	3.1	58	58	56	55
Qpe	T-DK-003	2	8	461.146	12	21	46.4607	2.89067	270	6.1	7.8	12	15.1	18.5	22.2	24.7	24.1	21.7	16.3	10.3	6.4	-1	-0.3	1.4	4.2	7.3	10.6	12.3	12	10.2	6.1	2.8	-0.2	2.6	3.7	6.7	9.6	12.9	16.4	18.5	18.1	15.9	11.2	6.6	3.1	58	58	56	55
Qpe	T-DK-003	3	8	483.636	11	21	46.4607	2.89067	270	6.1	7.8	12	15.1	18.5	22.2	24.7	24.1	21.7	16.3	10.3	6.4	-1	-0.3	1.4	4.2	7.3	10.6	12.3	12	10.2	6.1	2.8	-0.2	2.6	3.7	6.7	9.6	12.9	16.4	18.5	18.1	15.9	11.2	6.6	3.1	58	58	56	55
Qpe	T-DK-003	4	8	424.667	15	21	46.4607	2.89067	270	6.1	7.8	12	15.1	18.5	22.2	24.7	24.1	21.7	16.3	10.3	6.4	-1	-0.3	1.4	4.2	7.3	10.6	12.3	12	10.2	6.1	2.8	-0.2	2.6	3.7	6.7	9.6	12.9	16.4	18.5	18.1	15.9	11.2	6.6	3.1	58	58	56	55
Qpe	T-DK-003	1	8	445	12	26	51.948	-2.45	70	6.5	6.8	9.1	12.2	15.5	18.9	20.3	19.9	17.6	14.2	9.5	7.4	1.2	1.1	2.2	4.5	7.2	10.3	11.8	11.6	9.6	7.3	3.6	2.1	3.9	4	5.6	8.3	11.3	14.6	16.1	15.7	13.6	10.7	6.5	4.8	69	48	55	49
Qpe	T-DK-003	2	8	412.25	15	26	51.948	-2.45	70	6.5	6.8	9.1	12.2	15.5	18.9	20.3	19.9	17.6	14.2	9.5	7.4	1.2	1.1	2.2	4.5	7.2	10.3	11.8	11.6	9.6	7.3	3.6	2.1	3.9	4	5.6	8.3	11.3	14.6	16.1	15.7	13.6	10.7	6.5	4.8	69	48	55	49
Qpe	T-DK-003	3	8	480.208	12	26	51.948	-2.45	70	6.5	6.8	9.1	12.2	15.5	18.9	20.3	19.9	17.6	14.2	9.5	7.4	1.2	1.1	2.2	4.5	7.2	10.3	11.8	11.6	9.6	7.3	3.6	2.1	3.9	4	5.6	8.3	11.3	14.6	16.1	15.7	13.6	10.7	6.5	4.8	69	48	55	49
Qpe	T-DK-003	4	8	476.136	11	26	51.948	-2.45	70	6.5	6.8	9.1	12.2	15.5	18.9	20.3	19.9	17.6	14.2	9.5	7.4	1.2	1.1	2.2	4.5	7.2	10.3	11.8	11.6	9.6	7.3	3.6	2.1	3.9	4	5.6	8.3	11.3	14.6	16.1	15.7	13.6	10.7	6.5	4.8	69	48	55	49
Qpe	T-DK-003	1	8	478.068	11	260	56.071	9.597	25	2.7	3.3	5.4	9.2	14.7	18	19.3	19.1	15.9	11.6	7.3	4.3	-5.4	-5.4	-2	2.8	7.6	11	12.9	11.7	9.3	5.6	1.1	0.2	-1.3	-1	1.7	6	11.1	14.5	16.1	15.4	12.6	8.6	4.2	2.2	59	41	47	43
Qpe	T-DK-003	2	8	515.536	14	260	56.071	9.597	25	2.7	3.3	5.4	9.2	14.7	18	19.3	19.1	15.9	11.6	7.3	4.3	-5.4	-5.4	-2	2.8	7.6	11	12.9	11.7	9.3	5.6	1.1	0.2	-1.3	-1	1.7	6	11.1	14.5	16.1	15.4	12.6	8.6	4.2	2.2	59	41	47	43
Qpe	T-DK-003	3	8	491.562	12	260	56.071	9.597	25	2.7	3.3	5.4	9.2	14.7	18	19.3	19.1	15.9	11.6	7.3	4.3	-5.4	-5.4	-2	2.8	7.6	11	12.9	11.7	9.3	5.6	1.1	0.2	-1.3	-1	1.7	6	11.1	14.5	16.1	15.4	12.6	8.6	4.2	2.2	59	41	47	43
Qpe	T-DK-003	4	8	444.196	14	260	56.071	9.597	25	2.7	3.3	5.4	9.2	14.7	18	19.3	19.1	15.9	11.6	7.3	4.3	-5.4	-5.4	-2	2.8	7.6	11	12.9	11.7	9.3	5.6	1.1	0.2	-1.3	-1	1.7	6	11.1	14.5	16.1	15.4	12.6	8.6	4.2	2.2	59	41	47	43
Qpe	T-DK-003	1	8	484.875	10	263	53.707	9.762	10	2	3.1	6.7	11.8	17	20.3	21.5	21.4	18.6	13	7.3	3.7	-2.6	-2.5	-0.3	2.7	6.6	9.9	11.9	11.5	9	5.8	2.3	-0.8	-0.3	0.3	3.2	7.3	11.8	15.1	16.7	16.4	13.8	9.4	4.8	1.5	62	44	52	47
Qpe	T-DK-003	2	8	464.25	15	263	53.707	9.762	10	2	3.1	6.7	11.8	17	20.3	21.5	21.4	18.6	13	7.3	3.7	-2.6	-2.5	-0.3	2.7	6.6	9.9	11.9	11.5	9	5.8	2.3	-0.8	-0.3	0.3	3.2	7.3	11.8	15.1	16.7	16.4	13.8	9.4	4.8	1.5	62	44	52	47
Qpe	T-DK-003	3	8	422.5	12	263	53.707	9.762	10	2	3.1	6.7	11.8	17	20.3	21.5	21.4	18.6	13	7.3	3.7	-2.6	-2.5	-0.3	2.7	6.6	9.9	11.9	11.5	9	5.8	2.3	-0.8	-0.3	0.3	3.2	7.3	11.8	15.1	16.7	16.4	13.8	9.4	4.8	1.5	62	44	52	47
Qpe	T-DK-003	4	8	482.167	15	263	53.707	9.762	10	2	3.1	6.7	11.8	17	20.3	21.5	21.4	18.6	13	7.3	3.7	-2.6	-2.5	-0.3	2.7	6.6	9.9	11.9	11.5	9	5.8	2.3	-0.8	-0.3	0.3	3.2	7.3	11.8	15.1	16.7	16.4	13.8	9.4	4.8	1.5	62	44	52	47
Qpe	T-DK-003	1	8	429.554	14	277	40.917	31.667	1200	2.1	3.8	8.1	12.7	17.1	20.7	22.8	23	20.4	14.9	10.3	4.2	-4.5	-3.4	-1.1	2.7	6.5	9.2	11.4	11.1	8.7	5	1.6	-2	-1.2	0.2	3.5	7.7	11.8	14.9	17.1	17	14.6	10	6	1.1	87	69	68	67
Qpe	T-DK-003	2	8	515.972	9	277	40.917	31.667	1200	2.1	3.8	8.1	12.7	17.1	20.7	22.8	23	20.4	14.9	10.3	4.2	-4.5	-3.4	-1.1	2.7	6.5	9.2	11.4	11.1	8.7	5	1.6	-2	-1.2	0.2	3.5	7.7	11.8	14.9	17.1	17	14.6	10	6	1.1	87	69	68	67
Qpe	T-DK-003	4	8	336.442	13	277	40.917	31.667	1200	2.1	3.8	8.1	12.7	17.1	20.7	22.8	23	20.4	14.9	10.3	4.2	-4.5	-3.4	-1.1	2.7	6.5	9.2	11.4	11.1	8.7	5	1.6	-2	-1.2	0.2	3.5	7.7	11.8	14.9	17.1	17	14.6	10	6	1.1	87	69	68	67
Qpe	T-DK-003	1	8	454.375	10	31	52.8327	10.317	110	2	3.1	7.1	12.2	17.7	21	22.3	22	18.5	13	7	3.3	-3.1	-3	-0.8	2.4	6.3	9.6	11.7	11.2	8.5	5.2	1.8	-1.6	-0.6	0	3.1	7.3	12	15.3	17	16.6	13.5	9.1	4.4	0.8	53	42	47	50
Qpe	T-DK-003	2	8	530.938	12	31	52.8327	10.317	110	2	3.1	7.1	12.2	17.7	21	22.3	22	18.5	13	7	3.3	-3.1	-3	-0.8	2.4	6.3	9.6	11.7	11.2	8.5	5.2	1.8	-1.6	-0.6	0	3.1	7.3	12	15.3	17	16.6	13.5	9.1	4.4	0.8	53	42	47	50
Qpe	T-DK-003	3	8	478.056	9	31	52.8327	10.317	110	2	3.1	7.1	12.2	17.7	21	22.3	22	18.5	13	7	3.3	-3.1	-3	-0.8	2.4	6.3	9.6	11.7	11.2	8.5	5.2	1.8	-1.6	-0.6	0	3.1	7.3	12	15.3	17	16.6	13.5	9.1	4.4	0.8	53	42	47	50
Qpe	T-DK-003	4	8	522.422	16	31	52.8327	10.317	110	2	3.1	7.1	12.2	17.7	21	22.3	22	18.5	13	7	3.3	-3.1	-3	-0.8	2.4	6.3	9.6	11.7	11.2	8.5	5.2	1.8	-1.6	-0.6	0	3.1	7.3	12	15.3	17	16.6	13.5	9.1	4.4	0.8	53	42	47	50
Qpe	T-DK-003	1	8	473.295	11	33	51.1827	17.9313	210	-0.2	1.5	6.7	13	18.2	21.7	22.8	22.6	18.6	13.6	6.9	2.1	-5.7	-4.5	-0.9	3	7.4	10.9	12	11.6	8.8	4.7	1	-3.1	-3	-1.5	2.9	8	12.8	16.3	17.4	17.1	13.7	9.1	4	-0.5	31	28	29	37
Qpe	T-DK-003	2	8	459.135	13	33	51.1827	17.9313	210	-0.2	1.5	6.7	13	18.2	21.7	22.8	22.6	18.6	13.6	6.9	2.1	-5.7	-4.5	-0.9	3	7.4	10.9	12	11.6	8.8	4.7	1	-3.1	-3	-1.5	2.9	8	12.8	16.3	17.4	17.1	13.7	9.1	4	-0.5	31	28	29	37
Qpe	T-DK-003	3	8	445.288	13	33	51.1827	17.9313	210	-0.2	1.5	6.7	13	18.2	21.7	22.8	22.6	18.6	13.6	6.9	2.1	-5.7	-4.5	-0.9	3	7.4	10.9	12	11.6	8.8	4.7	1	-3.1	-3	-1.5	2.9	8	12.8	16.3	17.4	17.1	13.7	9.1	4	-0.5	31	28	29	37
Qpe	T-DK-003	4	8	504	10	33	51.1827	17.9313	210	-0.2	1.5	6.7	13	18.2	21.7	22.8	22.6	18.6	13.6	6.9	2.1	-5.7	-4.5	-0.9	3	7.4	10.9	12	11.6	8.8	4.7	1	-3.1	-3	-1.5	2.9	8	12.8	16.3	17.4	17.1	13.7	9.1	4	-0.5	31	28	29	37
Qpe	T-DK-003	1	8	459.875	10	4	47.8091	0.390286	156.75	6.2	7.6	11.4	14.8	18.1	21.9	24.1	23.6	20.9	15.8	10.1	6.5	0.1	0.6	2.2	4.7	7.6	10.8	12.6	12.3	10.3	6.8	3.5	0.9	3.1	4.1	6.8	9.8	12.8	16.3	18.3	17.9	15.6	11.3	6.8	3.7	68	61	57	53
Qpe	T-DK-003	2	8	443.594	8	4	47.8091	0.390286	156.75	6.2	7.6	11.4	14.8	18.1	21.9	24.1	23.6	20.9	15.8	10.1	6.5	0.1	0.6	2.2	4.7	7.6	10.8	12.6	12.3	10.3	6.8	3.5	0.9	3.1	4.1	6.8	9.8	12.8	16.3	18.3	17.9	15.6	11.3	6.8	3.7	68	61	57	53
Qpe	T-DK-003	4	8	445	11	4	47.8091	0.390286	156.75	6.2	7.6	11.4	14.8	18.1	21.9	24.1	23.6	20.9	15.8	10.1	6.5	0.1	0.6	2.2	4.7	7.6	10.8	12.6	12.3	10.3	6.8	3.5	0.9	3.1	4.1	6.8	9.8	12.8	16.3	18.3	17.9	15.6	11.3	6.8	3.7	68	61	57	53
Qpe	T-DK-003	1	8	511.029	17	41	56.1315	9.396	250	1.3	1.9	4.1	7.8	13.6	16.9	17.9	18.1	14.6	10.5	6	2.9	-6	-6	-2.9	1.3	6.1	9.4	11	10.2	7.8	4.5	-0.4	-0.8	-2.4	-2	0.6	4.6	9.8	13.1	14.5	14.1	11.2	7.5	2.8	1.1	61	42	47	47
Qpe	T-DK-003	2	8	517.019	13	41	56.1315	9.396	250	1.3	1.9	4.1	7.8	13.6	16.9	17.9	18.1	14.6	10.5	6	2.9	-6	-6	-2.9	1.3	6.1	9.4	11	10.2	7.8	4.5	-0.4	-0.8	-2.4	-2	0.6	4.6	9.8	13.1	14.5	14.1	11.2	7.5	2.8	1.1	61	42	47	47
Qpe	T-DK-003	3	8	519.107	14	41	56.1315	9.396	250	1.3	1.9	4.1	7.8	13.6	16.9	17.9	18.1	14.6	10.5	6	2.9	-6	-6	-2.9	1.3	6.1	9.4	11	10.2	7.8	4.5	-0.4	-0.8	-2.4	-2	0.6	4.6	9.8	13.1	14.5	14.1	11.2	7.5	2.8	1.1	61	42	47	47
Qpe	T-DK-003	4	8	515.75	15	41	56.1315	9.396	250	1.3	1.9	4.1	7.8	13.6	16.9	17.9	18.1	14.6	10.5	6	2.9	-6	-6	-2.9	1.3	6.1	9.4	11	10.2	7.8	4.5	-0.4	-0.8	-2.4	-2	0.6	4.6	9.8	13.1	14.5	14.1	11.2	7.5	2.8	1.1	61	42	47	47
Qpe	T-DK-003	1	8	508.977	11	50	46.604	0.178	130	6.9	8.3	12.3	15.4	18.5	22.5	24.6	24.1	21.8	16.6	11	7.3	0.6	1.2	2.8	5.3	8	11.4	13.2	12.8	11.1	7.4	4.1	1.3	3.7	4.7	7.5	10.3	13.2	16.9	18.9	18.5	16.4	12	7.5	4.3	70	62	57	53
Qpe	T-DK-003	2	8	494.659	11	50	46.604	0.178	130	6.9	8.3	12.3	15.4	18.5	22.5	24.6	24.1	21.8	16.6	11	7.3	0.6	1.2	2.8	5.3	8	11.4	13.2	12.8	11.1	7.4	4.1	1.3	3.7	4.7	7.5	10.3	13.2	16.9	18.9	18.5	16.4	12	7.5	4.3	70	62	57	53
Qpe	T-DK-003	3	8	398.542	12	50	46.604	0.178	130	6.9	8.3	12.3	15.4	18.5	22.5	24.6	24.1	21.8	16.6	11	7.3	0.6	1.2	2.8	5.3	8	11.4	13.2	12.8	11.1	7.4	4.1	1.3	3.7	4.7	7.5	10.3	13.2	16.9	18.9	18.5	16.4	12	7.5	4.3	70	62	57	53
Qpe	T-DK-003	4	8	420.833	15	50	46.604	0.178	130	6.9	8.3	12.3	15.4	18.5	22.5	24.6	24.1	21.8	16.6	11	7.3	0.6	1.2	2.8	5.3	8	11.4	13.2	12.8	11.1	7.4	4.1	1.3	3.7	4.7	7.5	10.3	13.2	16.9	18.9	18.5	16.4	12	7.5	4.3	70	62	57	53
Qpe	T-DK-003	1	8	431.458	12	61	51.769	7.174	75	3.9	5	8.3	12.8	17.4	20.5	21.9	21.5	18.9	14.4	7.9	4.9	-0.9	-0.6	1.6	4.1	7.9	10.8	12.5	12	9.7	6.8	2.8	0.2	1.5	2.2	5	8.5	12.7	15.7	17.2	16.7	14.3	10.6	5.4	2.5	71	49	64	55
Qpe	T-DK-003	2	8	457.583	15	61	51.769	7.174	75	3.9	5	8.3	12.8	17.4	20.5	21.9	21.5	18.9	14.4	7.9	4.9	-0.9	-0.6	1.6	4.1	7.9	10.8	12.5	12	9.7	6.8	2.8	0.2	1.5	2.2	5	8.5	12.7	15.7	17.2	16.7	14.3	10.6	5.4	2.5	71	49	64	55
Qpe	T-DK-003	3	8	459.091	11	61	51.769	7.174	75	3.9	5	8.3	12.8	17.4	20.5	21.9	21.5	18.9	14.4	7.9	4.9	-0.9	-0.6	1.6	4.1	7.9	10.8	12.5	12	9.7	6.8	2.8	0.2	1.5	2.2	5	8.5	12.7	15.7	17.2	16.7	14.3	10.6	5.4	2.5	71	49	64	55
Qpe	T-DK-003	4	8	440.75	15	61	51.769	7.174	75	3.9	5	8.3	12.8	17.4	20.5	21.9	21.5	18.9	14.4	7.9	4.9	-0.9	-0.6	1.6	4.1	7.9	10.8	12.5	12	9.7	6.8	2.8	0.2	1.5	2.2	5	8.5	12.7	15.7	17.2	16.7	14.3	10.6	5.4	2.5	71	49	64	55
Qpe	T-DK-003	1	8	396.25	15	77	47.761	5.487	330	3.4	5.3	10	14.1	17.8	21.1	23.4	22.9	20.1	14.5	8.2	3.9	-1.8	-1.3	1.3	4.4	7.7	11.1	12.9	12.5	10.4	6.2	2	-0.9	0.8	2	5.6	9.2	12.7	16.1	18.1	17.7	15.3	10.4	5.1	1.5	83	71	72	56
Qpe	T-DK-003	2	8	478.636	11	77	47.761	5.487	330	3.4	5.3	10	14.1	17.8	21.1	23.4	22.9	20.1	14.5	8.2	3.9	-1.8	-1.3	1.3	4.4	7.7	11.1	12.9	12.5	10.4	6.2	2	-0.9	0.8	2	5.6	9.2	12.7	16.1	18.1	17.7	15.3	10.4	5.1	1.5	83	71	72	56
Qpe	T-DK-003	3	8	359.615	13	77	47.761	5.487	330	3.4	5.3	10	14.1	17.8	21.1	23.4	22.9	20.1	14.5	8.2	3.9	-1.8	-1.3	1.3	4.4	7.7	11.1	12.9	12.5	10.4	6.2	2	-0.9	0.8	2	5.6	9.2	12.7	16.1	18.1	17.7	15.3	10.4	5.1	1.5	83	71	72	56
Qpe	T-DK-003	4	8	463.281	8	77	47.761	5.487	330	3.4	5.3	10	14.1	17.8	21.1	23.4	22.9	20.1	14.5	8.2	3.9	-1.8	-1.3	1.3	4.4	7.7	11.1	12.9	12.5	10.4	6.2	2	-0.9	0.8	2	5.6	9.2	12.7	16.1	18.1	17.7	15.3	10.4	5.1	1.5	83	71	72	56
Qpe	T-DK-003	1	8	540.75	15	87	49.361	7.872	470	1.1	3.3	7.3	12	16.1	19.9	21.3	20.4	18.6	13	6.2	3	-3.8	-3.2	-0.9	2.4	5.9	9.4	10.9	10.5	8.2	4.6	0.4	-2.2	-1.4	0	3.2	7.2	11	14.6	16.1	15.4	13.4	8.8	3.3	0.4	63	54	51	52
Qpe	T-DK-003	2	8	457.885	13	87	49.361	7.872	470	1.1	3.3	7.3	12	16.1	19.9	21.3	20.4	18.6	13	6.2	3	-3.8	-3.2	-0.9	2.4	5.9	9.4	10.9	10.5	8.2	4.6	0.4	-2.2	-1.4	0	3.2	7.2	11	14.6	16.1	15.4	13.4	8.8	3.3	0.4	63	54	51	52
Qpe	T-DK-003	3	8	395.167	15	87	49.361	7.872	470	1.1	3.3	7.3	12	16.1	19.9	21.3	20.4	18.6	13	6.2	3	-3.8	-3.2	-0.9	2.4	5.9	9.4	10.9	10.5	8.2	4.6	0.4	-2.2	-1.4	0	3.2	7.2	11	14.6	16.1	15.4	13.4	8.8	3.3	0.4	63	54	51	52
Qpe	T-DK-003	4	8	481.923	13	87	49.361	7.872	470	1.1	3.3	7.3	12	16.1	19.9	21.3	20.4	18.6	13	6.2	3	-3.8	-3.2	-0.9	2.4	5.9	9.4	10.9	10.5	8.2	4.6	0.4	-2.2	-1.4	0	3.2	7.2	11	14.6	16.1	15.4	13.4	8.8	3.3	0.4	63	54	51	52
Qpe	T-FR-009	2001001	8	321.187	24	1	51.7942	-2.4895	90.6667	6.4	6.6	8.9	12.2	15.4	18.9	20.4	19.9	17.5	13.9	9.3	7.3	1.1	1	2	4.4	7.1	10.3	11.8	11.6	9.5	7.1	3.4	1.9	3.8	3.8	5.5	8.3	11.3	14.6	16.1	15.7	13.5	10.5	6.4	4.6	81	56	64	54
Qpe	T-FR-009	2002009	8	331.977	23	1	51.7942	-2.4895	90.6667	6.4	6.6	8.9	12.2	15.4	18.9	20.4	19.9	17.5	13.9	9.3	7.3	1.1	1	2	4.4	7.1	10.3	11.8	11.6	9.5	7.1	3.4	1.9	3.8	3.8	5.5	8.3	11.3	14.6	16.1	15.7	13.5	10.5	6.4	4.6	81	56	64	54
Qpe	T-FR-009	2003015	8	320.494	24	1	51.7942	-2.4895	90.6667	6.4	6.6	8.9	12.2	15.4	18.9	20.4	19.9	17.5	13.9	9.3	7.3	1.1	1	2	4.4	7.1	10.3	11.8	11.6	9.5	7.1	3.4	1.9	3.8	3.8	5.5	8.3	11.3	14.6	16.1	15.7	13.5	10.5	6.4	4.6	81	56	64	54
Qpe	T-FR-009	2004023	8	378.905	24	1	51.7942	-2.4895	90.6667	6.4	6.6	8.9	12.2	15.4	18.9	20.4	19.9	17.5	13.9	9.3	7.3	1.1	1	2	4.4	7.1	10.3	11.8	11.6	9.5	7.1	3.4	1.9	3.8	3.8	5.5	8.3	11.3	14.6	16.1	15.7	13.5	10.5	6.4	4.6	81	56	64	54
Qpe	T-FR-009	2005030	8	361.14	24	1	51.7942	-2.4895	90.6667	6.4	6.6	8.9	12.2	15.4	18.9	20.4	19.9	17.5	13.9	9.3	7.3	1.1	1	2	4.4	7.1	10.3	11.8	11.6	9.5	7.1	3.4	1.9	3.8	3.8	5.5	8.3	11.3	14.6	16.1	15.7	13.5	10.5	6.4	4.6	81	56	64	54
Qpe	T-FR-009	2006033	8	357.648	22	1	51.7942	-2.4895	90.6667	6.4	6.6	8.9	12.2	15.4	18.9	20.4	19.9	17.5	13.9	9.3	7.3	1.1	1	2	4.4	7.1	10.3	11.8	11.6	9.5	7.1	3.4	1.9	3.8	3.8	5.5	8.3	11.3	14.6	16.1	15.7	13.5	10.5	6.4	4.6	81	56	64	54
Qpe	T-FR-009	2007042	8	243.391	21	1	51.7942	-2.4895	90.6667	6.4	6.6	8.9	12.2	15.4	18.9	20.4	19.9	17.5	13.9	9.3	7.3	1.1	1	2	4.4	7.1	10.3	11.8	11.6	9.5	7.1	3.4	1.9	3.8	3.8	5.5	8.3	11.3	14.6	16.1	15.7	13.5	10.5	6.4	4.6	81	56	64	54
Qpe	T-FR-009	2008046	8	326.681	21	1	51.7942	-2.4895	90.6667	6.4	6.6	8.9	12.2	15.4	18.9	20.4	19.9	17.5	13.9	9.3	7.3	1.1	1	2	4.4	7.1	10.3	11.8	11.6	9.5	7.1	3.4	1.9	3.8	3.8	5.5	8.3	11.3	14.6	16.1	15.7	13.5	10.5	6.4	4.6	81	56	64	54
Qpe	T-FR-009	2009052	8	346.411	23	1	51.7942	-2.4895	90.6667	6.4	6.6	8.9	12.2	15.4	18.9	20.4	19.9	17.5	13.9	9.3	7.3	1.1	1	2	4.4	7.1	10.3	11.8	11.6	9.5	7.1	3.4	1.9	3.8	3.8	5.5	8.3	11.3	14.6	16.1	15.7	13.5	10.5	6.4	4.6	81	56	64	54
Qpe	T-FR-009	2010055	8	177.068	23	1	51.7942	-2.4895	90.6667	6.4	6.6	8.9	12.2	15.4	18.9	20.4	19.9	17.5	13.9	9.3	7.3	1.1	1	2	4.4	7.1	10.3	11.8	11.6	9.5	7.1	3.4	1.9	3.8	3.8	5.5	8.3	11.3	14.6	16.1	15.7	13.5	10.5	6.4	4.6	81	56	64	54
Qpe	T-FR-009	4001003	8	260.175	24	1	51.7942	-2.4895	90.6667	6.4	6.6	8.9	12.2	15.4	18.9	20.4	19.9	17.5	13.9	9.3	7.3	1.1	1	2	4.4	7.1	10.3	11.8	11.6	9.5	7.1	3.4	1.9	3.8	3.8	5.5	8.3	11.3	14.6	16.1	15.7	13.5	10.5	6.4	4.6	81	56	64	54
Qpe	T-FR-009	4001007	8	271.158	24	1	51.7942	-2.4895	90.6667	6.4	6.6	8.9	12.2	15.4	18.9	20.4	19.9	17.5	13.9	9.3	7.3	1.1	1	2	4.4	7.1	10.3	11.8	11.6	9.5	7.1	3.4	1.9	3.8	3.8	5.5	8.3	11.3	14.6	16.1	15.7	13.5	10.5	6.4	4.6	81	56	64	54
Qpe	T-FR-009	4001010	8	213.322	23	1	51.7942	-2.4895	90.6667	6.4	6.6	8.9	12.2	15.4	18.9	20.4	19.9	17.5	13.9	9.3	7.3	1.1	1	2	4.4	7.1	10.3	11.8	11.6	9.5	7.1	3.4	1.9	3.8	3.8	5.5	8.3	11.3	14.6	16.1	15.7	13.5	10.5	6.4	4.6	81	56	64	54
Qpe	T-FR-009	4001015	8	263.635	23	1	51.7942	-2.4895	90.6667	6.4	6.6	8.9	12.2	15.4	18.9	20.4	19.9	17.5	13.9	9.3	7.3	1.1	1	2	4.4	7.1	10.3	11.8	11.6	9.5	7.1	3.4	1.9	3.8	3.8	5.5	8.3	11.3	14.6	16.1	15.7	13.5	10.5	6.4	4.6	81	56	64	54
Qpe	T-FR-009	4002020	8	233.9	24	1	51.7942	-2.4895	90.6667	6.4	6.6	8.9	12.2	15.4	18.9	20.4	19.9	17.5	13.9	9.3	7.3	1.1	1	2	4.4	7.1	10.3	11.8	11.6	9.5	7.1	3.4	1.9	3.8	3.8	5.5	8.3	11.3	14.6	16.1	15.7	13.5	10.5	6.4	4.6	81	56	64	54
Qpe	T-FR-009	4002025	8	311.887	23	1	51.7942	-2.4895	90.6667	6.4	6.6	8.9	12.2	15.4	18.9	20.4	19.9	17.5	13.9	9.3	7.3	1.1	1	2	4.4	7.1	10.3	11.8	11.6	9.5	7.1	3.4	1.9	3.8	3.8	5.5	8.3	11.3	14.6	16.1	15.7	13.5	10.5	6.4	4.6	81	56	64	54
Qpe	T-FR-009	4002027	8	236.873	22	1	51.7942	-2.4895	90.6667	6.4	6.6	8.9	12.2	15.4	18.9	20.4	19.9	17.5	13.9	9.3	7.3	1.1	1	2	4.4	7.1	10.3	11.8	11.6	9.5	7.1	3.4	1.9	3.8	3.8	5.5	8.3	11.3	14.6	16.1	15.7	13.5	10.5	6.4	4.6	81	56	64	54
Qpe	T-FR-009	4002030	8	297.287	23	1	51.7942	-2.4895	90.6667	6.4	6.6	8.9	12.2	15.4	18.9	20.4	19.9	17.5	13.9	9.3	7.3	1.1	1	2	4.4	7.1	10.3	11.8	11.6	9.5	7.1	3.4	1.9	3.8	3.8	5.5	8.3	11.3	14.6	16.1	15.7	13.5	10.5	6.4	4.6	81	56	64	54
Qpe	T-FR-009	4003038	8	334.971	21	1	51.7942	-2.4895	90.6667	6.4	6.6	8.9	12.2	15.4	18.9	20.4	19.9	17.5	13.9	9.3	7.3	1.1	1	2	4.4	7.1	10.3	11.8	11.6	9.5	7.1	3.4	1.9	3.8	3.8	5.5	8.3	11.3	14.6	16.1	15.7	13.5	10.5	6.4	4.6	81	56	64	54
Qpe	T-FR-009	4003046	8	257.65	24	1	51.7942	-2.4895	90.6667	6.4	6.6	8.9	12.2	15.4	18.9	20.4	19.9	17.5	13.9	9.3	7.3	1.1	1	2	4.4	7.1	10.3	11.8	11.6	9.5	7.1	3.4	1.9	3.8	3.8	5.5	8.3	11.3	14.6	16.1	15.7	13.5	10.5	6.4	4.6	81	56	64	54
Qpe	T-FR-009	4003047	8	376.714	21	1	51.7942	-2.4895	90.6667	6.4	6.6	8.9	12.2	15.4	18.9	20.4	19.9	17.5	13.9	9.3	7.3	1.1	1	2	4.4	7.1	10.3	11.8	11.6	9.5	7.1	3.4	1.9	3.8	3.8	5.5	8.3	11.3	14.6	16.1	15.7	13.5	10.5	6.4	4.6	81	56	64	54
Qpe	T-FR-009	4003050	8	332.143	21	1	51.7942	-2.4895	90.6667	6.4	6.6	8.9	12.2	15.4	18.9	20.4	19.9	17.5	13.9	9.3	7.3	1.1	1	2	4.4	7.1	10.3	11.8	11.6	9.5	7.1	3.4	1.9	3.8	3.8	5.5	8.3	11.3	14.6	16.1	15.7	13.5	10.5	6.4	4.6	81	56	64	54
Qpe	T-FR-009	4004055	8	330.739	23	1	51.7942	-2.4895	90.6667	6.4	6.6	8.9	12.2	15.4	18.9	20.4	19.9	17.5	13.9	9.3	7.3	1.1	1	2	4.4	7.1	10.3	11.8	11.6	9.5	7.1	3.4	1.9	3.8	3.8	5.5	8.3	11.3	14.6	16.1	15.7	13.5	10.5	6.4	4.6	81	56	64	54
Qpe	T-FR-009	4004061	8	344.642	24	1	51.7942	-2.4895	90.6667	6.4	6.6	8.9	12.2	15.4	18.9	20.4	19.9	17.5	13.9	9.3	7.3	1.1	1	2	4.4	7.1	10.3	11.8	11.6	9.5	7.1	3.4	1.9	3.8	3.8	5.5	8.3	11.3	14.6	16.1	15.7	13.5	10.5	6.4	4.6	81	56	64	54
Qpe	T-FR-009	4004065	8	294.739	23	1	51.7942	-2.4895	90.6667	6.4	6.6	8.9	12.2	15.4	18.9	20.4	19.9	17.5	13.9	9.3	7.3	1.1	1	2	4.4	7.1	10.3	11.8	11.6	9.5	7.1	3.4	1.9	3.8	3.8	5.5	8.3	11.3	14.6	16.1	15.7	13.5	10.5	6.4	4.6	81	56	64	54
Qpe	T-FR-009	4004067	8	324.504	23	1	51.7942	-2.4895	90.6667	6.4	6.6	8.9	12.2	15.4	18.9	20.4	19.9	17.5	13.9	9.3	7.3	1.1	1	2	4.4	7.1	10.3	11.8	11.6	9.5	7.1	3.4	1.9	3.8	3.8	5.5	8.3	11.3	14.6	16.1	15.7	13.5	10.5	6.4	4.6	81	56	64	54
Qpe	T-FR-009	4005071	8	336.575	24	1	51.7942	-2.4895	90.6667	6.4	6.6	8.9	12.2	15.4	18.9	20.4	19.9	17.5	13.9	9.3	7.3	1.1	1	2	4.4	7.1	10.3	11.8	11.6	9.5	7.1	3.4	1.9	3.8	3.8	5.5	8.3	11.3	14.6	16.1	15.7	13.5	10.5	6.4	4.6	81	56	64	54
Qpe	T-FR-009	4005081	8	314.9	24	1	51.7942	-2.4895	90.6667	6.4	6.6	8.9	12.2	15.4	18.9	20.4	19.9	17.5	13.9	9.3	7.3	1.1	1	2	4.4	7.1	10.3	11.8	11.6	9.5	7.1	3.4	1.9	3.8	3.8	5.5	8.3	11.3	14.6	16.1	15.7	13.5	10.5	6.4	4.6	81	56	64	54
Qpe	T-FR-009	4005083	8	301.975	24	1	51.7942	-2.4895	90.6667	6.4	6.6	8.9	12.2	15.4	18.9	20.4	19.9	17.5	13.9	9.3	7.3	1.1	1	2	4.4	7.1	10.3	11.8	11.6	9.5	7.1	3.4	1.9	3.8	3.8	5.5	8.3	11.3	14.6	16.1	15.7	13.5	10.5	6.4	4.6	81	56	64	54
Qpe	T-FR-009	4005085	8	296.245	22	1	51.7942	-2.4895	90.6667	6.4	6.6	8.9	12.2	15.4	18.9	20.4	19.9	17.5	13.9	9.3	7.3	1.1	1	2	4.4	7.1	10.3	11.8	11.6	9.5	7.1	3.4	1.9	3.8	3.8	5.5	8.3	11.3	14.6	16.1	15.7	13.5	10.5	6.4	4.6	81	56	64	54
Qpe	T-FR-009	2001006	8	237.405	20	21	46.4607	2.89067	270	6.1	7.8	12	15.1	18.5	22.2	24.7	24.1	21.7	16.3	10.3	6.4	-1	-0.3	1.4	4.2	7.3	10.6	12.3	12	10.2	6.1	2.8	-0.2	2.6	3.7	6.7	9.6	12.9	16.4	18.5	18.1	15.9	11.2	6.6	3.1	58	58	56	55
Qpe	T-FR-009	2002008	8	315.646	21	21	46.4607	2.89067	270	6.1	7.8	12	15.1	18.5	22.2	24.7	24.1	21.7	16.3	10.3	6.4	-1	-0.3	1.4	4.2	7.3	10.6	12.3	12	10.2	6.1	2.8	-0.2	2.6	3.7	6.7	9.6	12.9	16.4	18.5	18.1	15.9	11.2	6.6	3.1	58	58	56	55
Qpe	T-FR-009	2003016	8	242.998	23	21	46.4607	2.89067	270	6.1	7.8	12	15.1	18.5	22.2	24.7	24.1	21.7	16.3	10.3	6.4	-1	-0.3	1.4	4.2	7.3	10.6	12.3	12	10.2	6.1	2.8	-0.2	2.6	3.7	6.7	9.6	12.9	16.4	18.5	18.1	15.9	11.2	6.6	3.1	58	58	56	55
Qpe	T-FR-009	2004019	8	201.182	19	21	46.4607	2.89067	270	6.1	7.8	12	15.1	18.5	22.2	24.7	24.1	21.7	16.3	10.3	6.4	-1	-0.3	1.4	4.2	7.3	10.6	12.3	12	10.2	6.1	2.8	-0.2	2.6	3.7	6.7	9.6	12.9	16.4	18.5	18.1	15.9	11.2	6.6	3.1	58	58	56	55
Qpe	T-FR-009	2005025	8	318.246	23	21	46.4607	2.89067	270	6.1	7.8	12	15.1	18.5	22.2	24.7	24.1	21.7	16.3	10.3	6.4	-1	-0.3	1.4	4.2	7.3	10.6	12.3	12	10.2	6.1	2.8	-0.2	2.6	3.7	6.7	9.6	12.9	16.4	18.5	18.1	15.9	11.2	6.6	3.1	58	58	56	55
Qpe	T-FR-009	2006031	8	319.045	19	21	46.4607	2.89067	270	6.1	7.8	12	15.1	18.5	22.2	24.7	24.1	21.7	16.3	10.3	6.4	-1	-0.3	1.4	4.2	7.3	10.6	12.3	12	10.2	6.1	2.8	-0.2	2.6	3.7	6.7	9.6	12.9	16.4	18.5	18.1	15.9	11.2	6.6	3.1	58	58	56	55
Qpe	T-FR-009	2007041	8	158.887	21	21	46.4607	2.89067	270	6.1	7.8	12	15.1	18.5	22.2	24.7	24.1	21.7	16.3	10.3	6.4	-1	-0.3	1.4	4.2	7.3	10.6	12.3	12	10.2	6.1	2.8	-0.2	2.6	3.7	6.7	9.6	12.9	16.4	18.5	18.1	15.9	11.2	6.6	3.1	58	58	56	55
Qpe	T-FR-009	2008043	8	352.631	23	21	46.4607	2.89067	270	6.1	7.8	12	15.1	18.5	22.2	24.7	24.1	21.7	16.3	10.3	6.4	-1	-0.3	1.4	4.2	7.3	10.6	12.3	12	10.2	6.1	2.8	-0.2	2.6	3.7	6.7	9.6	12.9	16.4	18.5	18.1	15.9	11.2	6.6	3.1	58	58	56	55
Qpe	T-FR-009	2009050	8	343.725	20	21	46.4607	2.89067	270	6.1	7.8	12	15.1	18.5	22.2	24.7	24.1	21.7	16.3	10.3	6.4	-1	-0.3	1.4	4.2	7.3	10.6	12.3	12	10.2	6.1	2.8	-0.2	2.6	3.7	6.7	9.6	12.9	16.4	18.5	18.1	15.9	11.2	6.6	3.1	58	58	56	55
Qpe	T-FR-009	2010055	8	144.559	16	21	46.4607	2.89067	270	6.1	7.8	12	15.1	18.5	22.2	24.7	24.1	21.7	16.3	10.3	6.4	-1	-0.3	1.4	4.2	7.3	10.6	12.3	12	10.2	6.1	2.8	-0.2	2.6	3.7	6.7	9.6	12.9	16.4	18.5	18.1	15.9	11.2	6.6	3.1	58	58	56	55
Qpe	T-FR-009	4001005	8	260.124	21	21	46.4607	2.89067	270	6.1	7.8	12	15.1	18.5	22.2	24.7	24.1	21.7	16.3	10.3	6.4	-1	-0.3	1.4	4.2	7.3	10.6	12.3	12	10.2	6.1	2.8	-0.2	2.6	3.7	6.7	9.6	12.9	16.4	18.5	18.1	15.9	11.2	6.6	3.1	58	58	56	55
Qpe	T-FR-009	4001011	8	275.164	22	21	46.4607	2.89067	270	6.1	7.8	12	15.1	18.5	22.2	24.7	24.1	21.7	16.3	10.3	6.4	-1	-0.3	1.4	4.2	7.3	10.6	12.3	12	10.2	6.1	2.8	-0.2	2.6	3.7	6.7	9.6	12.9	16.4	18.5	18.1	15.9	11.2	6.6	3.1	58	58	56	55
Qpe	T-FR-009	4001016	8	276.982	22	21	46.4607	2.89067	270	6.1	7.8	12	15.1	18.5	22.2	24.7	24.1	21.7	16.3	10.3	6.4	-1	-0.3	1.4	4.2	7.3	10.6	12.3	12	10.2	6.1	2.8	-0.2	2.6	3.7	6.7	9.6	12.9	16.4	18.5	18.1	15.9	11.2	6.6	3.1	58	58	56	55
Qpe	T-FR-009	4002018	8	302.533	21	21	46.4607	2.89067	270	6.1	7.8	12	15.1	18.5	22.2	24.7	24.1	21.7	16.3	10.3	6.4	-1	-0.3	1.4	4.2	7.3	10.6	12.3	12	10.2	6.1	2.8	-0.2	2.6	3.7	6.7	9.6	12.9	16.4	18.5	18.1	15.9	11.2	6.6	3.1	58	58	56	55
Qpe	T-FR-009	4002025	8	327.008	24	21	46.4607	2.89067	270	6.1	7.8	12	15.1	18.5	22.2	24.7	24.1	21.7	16.3	10.3	6.4	-1	-0.3	1.4	4.2	7.3	10.6	12.3	12	10.2	6.1	2.8	-0.2	2.6	3.7	6.7	9.6	12.9	16.4	18.5	18.1	15.9	11.2	6.6	3.1	58	58	56	55
Qpe	T-FR-009	4002031	8	253.011	19	21	46.4607	2.89067	270	6.1	7.8	12	15.1	18.5	22.2	24.7	24.1	21.7	16.3	10.3	6.4	-1	-0.3	1.4	4.2	7.3	10.6	12.3	12	10.2	6.1	2.8	-0.2	2.6	3.7	6.7	9.6	12.9	16.4	18.5	18.1	15.9	11.2	6.6	3.1	58	58	56	55
Qpe	T-FR-009	4003040	8	249.82	20	21	46.4607	2.89067	270	6.1	7.8	12	15.1	18.5	22.2	24.7	24.1	21.7	16.3	10.3	6.4	-1	-0.3	1.4	4.2	7.3	10.6	12.3	12	10.2	6.1	2.8	-0.2	2.6	3.7	6.7	9.6	12.9	16.4	18.5	18.1	15.9	11.2	6.6	3.1	58	58	56	55
Qpe	T-FR-009	4003041	8	330.365	23	21	46.4607	2.89067	270	6.1	7.8	12	15.1	18.5	22.2	24.7	24.1	21.7	16.3	10.3	6.4	-1	-0.3	1.4	4.2	7.3	10.6	12.3	12	10.2	6.1	2.8	-0.2	2.6	3.7	6.7	9.6	12.9	16.4	18.5	18.1	15.9	11.2	6.6	3.1	58	58	56	55
Qpe	T-FR-009	4003048	8	314.484	19	21	46.4607	2.89067	270	6.1	7.8	12	15.1	18.5	22.2	24.7	24.1	21.7	16.3	10.3	6.4	-1	-0.3	1.4	4.2	7.3	10.6	12.3	12	10.2	6.1	2.8	-0.2	2.6	3.7	6.7	9.6	12.9	16.4	18.5	18.1	15.9	11.2	6.6	3.1	58	58	56	55
Qpe	T-FR-009	4004054	8	286.345	22	21	46.4607	2.89067	270	6.1	7.8	12	15.1	18.5	22.2	24.7	24.1	21.7	16.3	10.3	6.4	-1	-0.3	1.4	4.2	7.3	10.6	12.3	12	10.2	6.1	2.8	-0.2	2.6	3.7	6.7	9.6	12.9	16.4	18.5	18.1	15.9	11.2	6.6	3.1	58	58	56	55
Qpe	T-FR-009	4004061	8	297.33	20	21	46.4607	2.89067	270	6.1	7.8	12	15.1	18.5	22.2	24.7	24.1	21.7	16.3	10.3	6.4	-1	-0.3	1.4	4.2	7.3	10.6	12.3	12	10.2	6.1	2.8	-0.2	2.6	3.7	6.7	9.6	12.9	16.4	18.5	18.1	15.9	11.2	6.6	3.1	58	58	56	55
Qpe	T-FR-009	4004068	8	310.105	21	21	46.4607	2.89067	270	6.1	7.8	12	15.1	18.5	22.2	24.7	24.1	21.7	16.3	10.3	6.4	-1	-0.3	1.4	4.2	7.3	10.6	12.3	12	10.2	6.1	2.8	-0.2	2.6	3.7	6.7	9.6	12.9	16.4	18.5	18.1	15.9	11.2	6.6	3.1	58	58	56	55
Qpe	T-FR-009	4005073	8	276.696	23	21	46.4607	2.89067	270	6.1	7.8	12	15.1	18.5	22.2	24.7	24.1	21.7	16.3	10.3	6.4	-1	-0.3	1.4	4.2	7.3	10.6	12.3	12	10.2	6.1	2.8	-0.2	2.6	3.7	6.7	9.6	12.9	16.4	18.5	18.1	15.9	11.2	6.6	3.1	58	58	56	55
Qpe	T-FR-009	4005079	8	333.724	21	21	46.4607	2.89067	270	6.1	7.8	12	15.1	18.5	22.2	24.7	24.1	21.7	16.3	10.3	6.4	-1	-0.3	1.4	4.2	7.3	10.6	12.3	12	10.2	6.1	2.8	-0.2	2.6	3.7	6.7	9.6	12.9	16.4	18.5	18.1	15.9	11.2	6.6	3.1	58	58	56	55
Qpe	T-FR-009	4005080	8	328.754	13	21	46.4607	2.89067	270	6.1	7.8	12	15.1	18.5	22.2	24.7	24.1	21.7	16.3	10.3	6.4	-1	-0.3	1.4	4.2	7.3	10.6	12.3	12	10.2	6.1	2.8	-0.2	2.6	3.7	6.7	9.6	12.9	16.4	18.5	18.1	15.9	11.2	6.6	3.1	58	58	56	55
Qpe	T-FR-009	2001003	8	270.541	21	26	51.948	-2.45	70	6.5	6.8	9.1	12.2	15.5	18.9	20.3	19.9	17.6	14.2	9.5	7.4	1.2	1.1	2.2	4.5	7.2	10.3	11.8	11.6	9.6	7.3	3.6	2.1	3.9	4	5.6	8.3	11.3	14.6	16.1	15.7	13.6	10.7	6.5	4.8	69	48	55	49
Qpe	T-FR-009	2002009	8	314.614	22	26	51.948	-2.45	70	6.5	6.8	9.1	12.2	15.5	18.9	20.3	19.9	17.6	14.2	9.5	7.4	1.2	1.1	2.2	4.5	7.2	10.3	11.8	11.6	9.6	7.3	3.6	2.1	3.9	4	5.6	8.3	11.3	14.6	16.1	15.7	13.6	10.7	6.5	4.8	69	48	55	49
Qpe	T-FR-009	2003017	8	240.534	24	26	51.948	-2.45	70	6.5	6.8	9.1	12.2	15.5	18.9	20.3	19.9	17.6	14.2	9.5	7.4	1.2	1.1	2.2	4.5	7.2	10.3	11.8	11.6	9.6	7.3	3.6	2.1	3.9	4	5.6	8.3	11.3	14.6	16.1	15.7	13.6	10.7	6.5	4.8	69	48	55	49
Qpe	T-FR-009	2004019	8	242.7	21	26	51.948	-2.45	70	6.5	6.8	9.1	12.2	15.5	18.9	20.3	19.9	17.6	14.2	9.5	7.4	1.2	1.1	2.2	4.5	7.2	10.3	11.8	11.6	9.6	7.3	3.6	2.1	3.9	4	5.6	8.3	11.3	14.6	16.1	15.7	13.6	10.7	6.5	4.8	69	48	55	49
Qpe	T-FR-009	2005026	8	291.14	24	26	51.948	-2.45	70	6.5	6.8	9.1	12.2	15.5	18.9	20.3	19.9	17.6	14.2	9.5	7.4	1.2	1.1	2.2	4.5	7.2	10.3	11.8	11.6	9.6	7.3	3.6	2.1	3.9	4	5.6	8.3	11.3	14.6	16.1	15.7	13.6	10.7	6.5	4.8	69	48	55	49
Qpe	T-FR-009	2006031	8	303.32	24	26	51.948	-2.45	70	6.5	6.8	9.1	12.2	15.5	18.9	20.3	19.9	17.6	14.2	9.5	7.4	1.2	1.1	2.2	4.5	7.2	10.3	11.8	11.6	9.6	7.3	3.6	2.1	3.9	4	5.6	8.3	11.3	14.6	16.1	15.7	13.6	10.7	6.5	4.8	69	48	55	49
Qpe	T-FR-009	2007041	8	199.329	23	26	51.948	-2.45	70	6.5	6.8	9.1	12.2	15.5	18.9	20.3	19.9	17.6	14.2	9.5	7.4	1.2	1.1	2.2	4.5	7.2	10.3	11.8	11.6	9.6	7.3	3.6	2.1	3.9	4	5.6	8.3	11.3	14.6	16.1	15.7	13.6	10.7	6.5	4.8	69	48	55	49
Qpe	T-FR-009	2008048	8	345.247	20	26	51.948	-2.45	70	6.5	6.8	9.1	12.2	15.5	18.9	20.3	19.9	17.6	14.2	9.5	7.4	1.2	1.1	2.2	4.5	7.2	10.3	11.8	11.6	9.6	7.3	3.6	2.1	3.9	4	5.6	8.3	11.3	14.6	16.1	15.7	13.6	10.7	6.5	4.8	69	48	55	49
Qpe	T-FR-009	2009054	8	317.126	21	26	51.948	-2.45	70	6.5	6.8	9.1	12.2	15.5	18.9	20.3	19.9	17.6	14.2	9.5	7.4	1.2	1.1	2.2	4.5	7.2	10.3	11.8	11.6	9.6	7.3	3.6	2.1	3.9	4	5.6	8.3	11.3	14.6	16.1	15.7	13.6	10.7	6.5	4.8	69	48	55	49
Qpe	T-FR-009	2010056	8	221.546	23	26	51.948	-2.45	70	6.5	6.8	9.1	12.2	15.5	18.9	20.3	19.9	17.6	14.2	9.5	7.4	1.2	1.1	2.2	4.5	7.2	10.3	11.8	11.6	9.6	7.3	3.6	2.1	3.9	4	5.6	8.3	11.3	14.6	16.1	15.7	13.6	10.7	6.5	4.8	69	48	55	49
Qpe	T-FR-009	4001007	8	198.122	23	260	56.071	9.597	25	2.7	3.3	5.4	9.2	14.7	18	19.3	19.1	15.9	11.6	7.3	4.3	-5.4	-5.4	-2	2.8	7.6	11	12.9	11.7	9.3	5.6	1.1	0.2	-1.3	-1	1.7	6	11.1	14.5	16.1	15.4	12.6	8.6	4.2	2.2	59	41	47	43
Qpe	T-FR-009	4001010	8	203.817	24	260	56.071	9.597	25	2.7	3.3	5.4	9.2	14.7	18	19.3	19.1	15.9	11.6	7.3	4.3	-5.4	-5.4	-2	2.8	7.6	11	12.9	11.7	9.3	5.6	1.1	0.2	-1.3	-1	1.7	6	11.1	14.5	16.1	15.4	12.6	8.6	4.2	2.2	59	41	47	43
Qpe	T-FR-009	4002026	8	254.539	23	260	56.071	9.597	25	2.7	3.3	5.4	9.2	14.7	18	19.3	19.1	15.9	11.6	7.3	4.3	-5.4	-5.4	-2	2.8	7.6	11	12.9	11.7	9.3	5.6	1.1	0.2	-1.3	-1	1.7	6	11.1	14.5	16.1	15.4	12.6	8.6	4.2	2.2	59	41	47	43
Qpe	T-FR-009	4002030	8	230.992	24	260	56.071	9.597	25	2.7	3.3	5.4	9.2	14.7	18	19.3	19.1	15.9	11.6	7.3	4.3	-5.4	-5.4	-2	2.8	7.6	11	12.9	11.7	9.3	5.6	1.1	0.2	-1.3	-1	1.7	6	11.1	14.5	16.1	15.4	12.6	8.6	4.2	2.2	59	41	47	43
Qpe	T-FR-009	4003036	8	224.527	22	260	56.071	9.597	25	2.7	3.3	5.4	9.2	14.7	18	19.3	19.1	15.9	11.6	7.3	4.3	-5.4	-5.4	-2	2.8	7.6	11	12.9	11.7	9.3	5.6	1.1	0.2	-1.3	-1	1.7	6	11.1	14.5	16.1	15.4	12.6	8.6	4.2	2.2	59	41	47	43
Qpe	T-FR-009	4003043	8	251.305	19	260	56.071	9.597	25	2.7	3.3	5.4	9.2	14.7	18	19.3	19.1	15.9	11.6	7.3	4.3	-5.4	-5.4	-2	2.8	7.6	11	12.9	11.7	9.3	5.6	1.1	0.2	-1.3	-1	1.7	6	11.1	14.5	16.1	15.4	12.6	8.6	4.2	2.2	59	41	47	43
Qpe	T-FR-009	4004057	8	277.287	23	260	56.071	9.597	25	2.7	3.3	5.4	9.2	14.7	18	19.3	19.1	15.9	11.6	7.3	4.3	-5.4	-5.4	-2	2.8	7.6	11	12.9	11.7	9.3	5.6	1.1	0.2	-1.3	-1	1.7	6	11.1	14.5	16.1	15.4	12.6	8.6	4.2	2.2	59	41	47	43
Qpe	T-FR-009	4004063	8	292.913	23	260	56.071	9.597	25	2.7	3.3	5.4	9.2	14.7	18	19.3	19.1	15.9	11.6	7.3	4.3	-5.4	-5.4	-2	2.8	7.6	11	12.9	11.7	9.3	5.6	1.1	0.2	-1.3	-1	1.7	6	11.1	14.5	16.1	15.4	12.6	8.6	4.2	2.2	59	41	47	43
Qpe	T-FR-009	4005069	8	271.21	21	260	56.071	9.597	25	2.7	3.3	5.4	9.2	14.7	18	19.3	19.1	15.9	11.6	7.3	4.3	-5.4	-5.4	-2	2.8	7.6	11	12.9	11.7	9.3	5.6	1.1	0.2	-1.3	-1	1.7	6	11.1	14.5	16.1	15.4	12.6	8.6	4.2	2.2	59	41	47	43
Qpe	T-FR-009	4005073	8	227.514	21	260	56.071	9.597	25	2.7	3.3	5.4	9.2	14.7	18	19.3	19.1	15.9	11.6	7.3	4.3	-5.4	-5.4	-2	2.8	7.6	11	12.9	11.7	9.3	5.6	1.1	0.2	-1.3	-1	1.7	6	11.1	14.5	16.1	15.4	12.6	8.6	4.2	2.2	59	41	47	43
Qpe	T-FR-009	4001001	8	195.118	22	277	40.917	31.667	1200	2.1	3.8	8.1	12.7	17.1	20.7	22.8	23	20.4	14.9	10.3	4.2	-4.5	-3.4	-1.1	2.7	6.5	9.2	11.4	11.1	8.7	5	1.6	-2	-1.2	0.2	3.5	7.7	11.8	14.9	17.1	17	14.6	10	6	1.1	87	69	68	67
Qpe	T-FR-009	4001014	8	259.983	23	277	40.917	31.667	1200	2.1	3.8	8.1	12.7	17.1	20.7	22.8	23	20.4	14.9	10.3	4.2	-4.5	-3.4	-1.1	2.7	6.5	9.2	11.4	11.1	8.7	5	1.6	-2	-1.2	0.2	3.5	7.7	11.8	14.9	17.1	17	14.6	10	6	1.1	87	69	68	67
Qpe	T-FR-009	4002020	8	221.522	23	277	40.917	31.667	1200	2.1	3.8	8.1	12.7	17.1	20.7	22.8	23	20.4	14.9	10.3	4.2	-4.5	-3.4	-1.1	2.7	6.5	9.2	11.4	11.1	8.7	5	1.6	-2	-1.2	0.2	3.5	7.7	11.8	14.9	17.1	17	14.6	10	6	1.1	87	69	68	67
Qpe	T-FR-009	4002029	8	204.018	22	277	40.917	31.667	1200	2.1	3.8	8.1	12.7	17.1	20.7	22.8	23	20.4	14.9	10.3	4.2	-4.5	-3.4	-1.1	2.7	6.5	9.2	11.4	11.1	8.7	5	1.6	-2	-1.2	0.2	3.5	7.7	11.8	14.9	17.1	17	14.6	10	6	1.1	87	69	68	67
Qpe	T-FR-009	4003035	8	301.774	23	277	40.917	31.667	1200	2.1	3.8	8.1	12.7	17.1	20.7	22.8	23	20.4	14.9	10.3	4.2	-4.5	-3.4	-1.1	2.7	6.5	9.2	11.4	11.1	8.7	5	1.6	-2	-1.2	0.2	3.5	7.7	11.8	14.9	17.1	17	14.6	10	6	1.1	87	69	68	67
Qpe	T-FR-009	4003049	8	257.304	23	277	40.917	31.667	1200	2.1	3.8	8.1	12.7	17.1	20.7	22.8	23	20.4	14.9	10.3	4.2	-4.5	-3.4	-1.1	2.7	6.5	9.2	11.4	11.1	8.7	5	1.6	-2	-1.2	0.2	3.5	7.7	11.8	14.9	17.1	17	14.6	10	6	1.1	87	69	68	67
Qpe	T-FR-009	4004054	8	290.509	22	277	40.917	31.667	1200	2.1	3.8	8.1	12.7	17.1	20.7	22.8	23	20.4	14.9	10.3	4.2	-4.5	-3.4	-1.1	2.7	6.5	9.2	11.4	11.1	8.7	5	1.6	-2	-1.2	0.2	3.5	7.7	11.8	14.9	17.1	17	14.6	10	6	1.1	87	69	68	67
Qpe	T-FR-009	4004061	8	281.15	24	277	40.917	31.667	1200	2.1	3.8	8.1	12.7	17.1	20.7	22.8	23	20.4	14.9	10.3	4.2	-4.5	-3.4	-1.1	2.7	6.5	9.2	11.4	11.1	8.7	5	1.6	-2	-1.2	0.2	3.5	7.7	11.8	14.9	17.1	17	14.6	10	6	1.1	87	69	68	67
Qpe	T-FR-009	4005069	8	241.991	22	277	40.917	31.667	1200	2.1	3.8	8.1	12.7	17.1	20.7	22.8	23	20.4	14.9	10.3	4.2	-4.5	-3.4	-1.1	2.7	6.5	9.2	11.4	11.1	8.7	5	1.6	-2	-1.2	0.2	3.5	7.7	11.8	14.9	17.1	17	14.6	10	6	1.1	87	69	68	67
Qpe	T-FR-009	4005080	8	289.889	18	277	40.917	31.667	1200	2.1	3.8	8.1	12.7	17.1	20.7	22.8	23	20.4	14.9	10.3	4.2	-4.5	-3.4	-1.1	2.7	6.5	9.2	11.4	11.1	8.7	5	1.6	-2	-1.2	0.2	3.5	7.7	11.8	14.9	17.1	17	14.6	10	6	1.1	87	69	68	67
Qpe	T-FR-009	4001014	8	275.075	24	31	52.8327	10.317	110	2	3.1	7.1	12.2	17.7	21	22.3	22	18.5	13	7	3.3	-3.1	-3	-0.8	2.4	6.3	9.6	11.7	11.2	8.5	5.2	1.8	-1.6	-0.6	0	3.1	7.3	12	15.3	17	16.6	13.5	9.1	4.4	0.8	53	42	47	50
Qpe	T-FR-009	4001016	8	283.583	24	31	52.8327	10.317	110	2	3.1	7.1	12.2	17.7	21	22.3	22	18.5	13	7	3.3	-3.1	-3	-0.8	2.4	6.3	9.6	11.7	11.2	8.5	5.2	1.8	-1.6	-0.6	0	3.1	7.3	12	15.3	17	16.6	13.5	9.1	4.4	0.8	53	42	47	50
Qpe	T-FR-009	4002020	8	237.045	22	31	52.8327	10.317	110	2	3.1	7.1	12.2	17.7	21	22.3	22	18.5	13	7	3.3	-3.1	-3	-0.8	2.4	6.3	9.6	11.7	11.2	8.5	5.2	1.8	-1.6	-0.6	0	3.1	7.3	12	15.3	17	16.6	13.5	9.1	4.4	0.8	53	42	47	50
Qpe	T-FR-009	4002034	8	311.983	24	31	52.8327	10.317	110	2	3.1	7.1	12.2	17.7	21	22.3	22	18.5	13	7	3.3	-3.1	-3	-0.8	2.4	6.3	9.6	11.7	11.2	8.5	5.2	1.8	-1.6	-0.6	0	3.1	7.3	12	15.3	17	16.6	13.5	9.1	4.4	0.8	53	42	47	50
Qpe	T-FR-009	4003037	8	266.033	24	31	52.8327	10.317	110	2	3.1	7.1	12.2	17.7	21	22.3	22	18.5	13	7	3.3	-3.1	-3	-0.8	2.4	6.3	9.6	11.7	11.2	8.5	5.2	1.8	-1.6	-0.6	0	3.1	7.3	12	15.3	17	16.6	13.5	9.1	4.4	0.8	53	42	47	50
Qpe	T-FR-009	4003044	8	312.692	24	31	52.8327	10.317	110	2	3.1	7.1	12.2	17.7	21	22.3	22	18.5	13	7	3.3	-3.1	-3	-0.8	2.4	6.3	9.6	11.7	11.2	8.5	5.2	1.8	-1.6	-0.6	0	3.1	7.3	12	15.3	17	16.6	13.5	9.1	4.4	0.8	53	42	47	50
Qpe	T-FR-009	4004056	8	325.2	20	31	52.8327	10.317	110	2	3.1	7.1	12.2	17.7	21	22.3	22	18.5	13	7	3.3	-3.1	-3	-0.8	2.4	6.3	9.6	11.7	11.2	8.5	5.2	1.8	-1.6	-0.6	0	3.1	7.3	12	15.3	17	16.6	13.5	9.1	4.4	0.8	53	42	47	50
Qpe	T-FR-009	4004058	8	298.173	22	31	52.8327	10.317	110	2	3.1	7.1	12.2	17.7	21	22.3	22	18.5	13	7	3.3	-3.1	-3	-0.8	2.4	6.3	9.6	11.7	11.2	8.5	5.2	1.8	-1.6	-0.6	0	3.1	7.3	12	15.3	17	16.6	13.5	9.1	4.4	0.8	53	42	47	50
Qpe	T-FR-009	4005082	8	296.287	23	31	52.8327	10.317	110	2	3.1	7.1	12.2	17.7	21	22.3	22	18.5	13	7	3.3	-3.1	-3	-0.8	2.4	6.3	9.6	11.7	11.2	8.5	5.2	1.8	-1.6	-0.6	0	3.1	7.3	12	15.3	17	16.6	13.5	9.1	4.4	0.8	53	42	47	50
Qpe	T-FR-009	4005083	8	250.876	21	31	52.8327	10.317	110	2	3.1	7.1	12.2	17.7	21	22.3	22	18.5	13	7	3.3	-3.1	-3	-0.8	2.4	6.3	9.6	11.7	11.2	8.5	5.2	1.8	-1.6	-0.6	0	3.1	7.3	12	15.3	17	16.6	13.5	9.1	4.4	0.8	53	42	47	50
Qpe	T-FR-009	4001001	8	230.875	24	33	51.1827	17.9313	210	-0.2	1.5	6.7	13	18.2	21.7	22.8	22.6	18.6	13.6	6.9	2.1	-5.7	-4.5	-0.9	3	7.4	10.9	12	11.6	8.8	4.7	1	-3.1	-3	-1.5	2.9	8	12.8	16.3	17.4	17.1	13.7	9.1	4	-0.5	31	28	29	37
Qpe	T-FR-009	4001009	8	267.8	22	33	51.1827	17.9313	210	-0.2	1.5	6.7	13	18.2	21.7	22.8	22.6	18.6	13.6	6.9	2.1	-5.7	-4.5	-0.9	3	7.4	10.9	12	11.6	8.8	4.7	1	-3.1	-3	-1.5	2.9	8	12.8	16.3	17.4	17.1	13.7	9.1	4	-0.5	31	28	29	37
Qpe	T-FR-009	4002026	8	258.765	23	33	51.1827	17.9313	210	-0.2	1.5	6.7	13	18.2	21.7	22.8	22.6	18.6	13.6	6.9	2.1	-5.7	-4.5	-0.9	3	7.4	10.9	12	11.6	8.8	4.7	1	-3.1	-3	-1.5	2.9	8	12.8	16.3	17.4	17.1	13.7	9.1	4	-0.5	31	28	29	37
Qpe	T-FR-009	4002027	8	264.355	22	33	51.1827	17.9313	210	-0.2	1.5	6.7	13	18.2	21.7	22.8	22.6	18.6	13.6	6.9	2.1	-5.7	-4.5	-0.9	3	7.4	10.9	12	11.6	8.8	4.7	1	-3.1	-3	-1.5	2.9	8	12.8	16.3	17.4	17.1	13.7	9.1	4	-0.5	31	28	29	37
Qpe	T-FR-009	4003037	8	275.364	22	33	51.1827	17.9313	210	-0.2	1.5	6.7	13	18.2	21.7	22.8	22.6	18.6	13.6	6.9	2.1	-5.7	-4.5	-0.9	3	7.4	10.9	12	11.6	8.8	4.7	1	-3.1	-3	-1.5	2.9	8	12.8	16.3	17.4	17.1	13.7	9.1	4	-0.5	31	28	29	37
Qpe	T-FR-009	4003039	8	226.473	22	33	51.1827	17.9313	210	-0.2	1.5	6.7	13	18.2	21.7	22.8	22.6	18.6	13.6	6.9	2.1	-5.7	-4.5	-0.9	3	7.4	10.9	12	11.6	8.8	4.7	1	-3.1	-3	-1.5	2.9	8	12.8	16.3	17.4	17.1	13.7	9.1	4	-0.5	31	28	29	37
Qpe	T-FR-009	4003050	8	292.209	23	33	51.1827	17.9313	210	-0.2	1.5	6.7	13	18.2	21.7	22.8	22.6	18.6	13.6	6.9	2.1	-5.7	-4.5	-0.9	3	7.4	10.9	12	11.6	8.8	4.7	1	-3.1	-3	-1.5	2.9	8	12.8	16.3	17.4	17.1	13.7	9.1	4	-0.5	31	28	29	37
Qpe	T-FR-009	4004060	8	352.962	21	33	51.1827	17.9313	210	-0.2	1.5	6.7	13	18.2	21.7	22.8	22.6	18.6	13.6	6.9	2.1	-5.7	-4.5	-0.9	3	7.4	10.9	12	11.6	8.8	4.7	1	-3.1	-3	-1.5	2.9	8	12.8	16.3	17.4	17.1	13.7	9.1	4	-0.5	31	28	29	37
Qpe	T-FR-009	4005082	8	313.518	22	33	51.1827	17.9313	210	-0.2	1.5	6.7	13	18.2	21.7	22.8	22.6	18.6	13.6	6.9	2.1	-5.7	-4.5	-0.9	3	7.4	10.9	12	11.6	8.8	4.7	1	-3.1	-3	-1.5	2.9	8	12.8	16.3	17.4	17.1	13.7	9.1	4	-0.5	31	28	29	37
Qpe	T-FR-009	4005085	8	295.174	23	33	51.1827	17.9313	210	-0.2	1.5	6.7	13	18.2	21.7	22.8	22.6	18.6	13.6	6.9	2.1	-5.7	-4.5	-0.9	3	7.4	10.9	12	11.6	8.8	4.7	1	-3.1	-3	-1.5	2.9	8	12.8	16.3	17.4	17.1	13.7	9.1	4	-0.5	31	28	29	37
Qpe	T-FR-009	1001002	8	283.369	45	4	47.8091	0.390286	156.75	6.2	7.6	11.4	14.8	18.1	21.9	24.1	23.6	20.9	15.8	10.1	6.5	0.1	0.6	2.2	4.7	7.6	10.8	12.6	12.3	10.3	6.8	3.5	0.9	3.1	4.1	6.8	9.8	12.8	16.3	18.3	17.9	15.6	11.3	6.8	3.7	68	61	57	53
Qpe	T-FR-009	1001003	8	234.266	21	4	47.8091	0.390286	156.75	6.2	7.6	11.4	14.8	18.1	21.9	24.1	23.6	20.9	15.8	10.1	6.5	0.1	0.6	2.2	4.7	7.6	10.8	12.6	12.3	10.3	6.8	3.5	0.9	3.1	4.1	6.8	9.8	12.8	16.3	18.3	17.9	15.6	11.3	6.8	3.7	68	61	57	53
Qpe	T-FR-009	1001004	8	254.709	24	4	47.8091	0.390286	156.75	6.2	7.6	11.4	14.8	18.1	21.9	24.1	23.6	20.9	15.8	10.1	6.5	0.1	0.6	2.2	4.7	7.6	10.8	12.6	12.3	10.3	6.8	3.5	0.9	3.1	4.1	6.8	9.8	12.8	16.3	18.3	17.9	15.6	11.3	6.8	3.7	68	61	57	53
Qpe	T-FR-009	1002007	8	294.949	24	4	47.8091	0.390286	156.75	6.2	7.6	11.4	14.8	18.1	21.9	24.1	23.6	20.9	15.8	10.1	6.5	0.1	0.6	2.2	4.7	7.6	10.8	12.6	12.3	10.3	6.8	3.5	0.9	3.1	4.1	6.8	9.8	12.8	16.3	18.3	17.9	15.6	11.3	6.8	3.7	68	61	57	53
Qpe	T-FR-009	1002009	8	242.98	23	4	47.8091	0.390286	156.75	6.2	7.6	11.4	14.8	18.1	21.9	24.1	23.6	20.9	15.8	10.1	6.5	0.1	0.6	2.2	4.7	7.6	10.8	12.6	12.3	10.3	6.8	3.5	0.9	3.1	4.1	6.8	9.8	12.8	16.3	18.3	17.9	15.6	11.3	6.8	3.7	68	61	57	53
Qpe	T-FR-009	1002011	8	310.631	24	4	47.8091	0.390286	156.75	6.2	7.6	11.4	14.8	18.1	21.9	24.1	23.6	20.9	15.8	10.1	6.5	0.1	0.6	2.2	4.7	7.6	10.8	12.6	12.3	10.3	6.8	3.5	0.9	3.1	4.1	6.8	9.8	12.8	16.3	18.3	17.9	15.6	11.3	6.8	3.7	68	61	57	53
Qpe	T-FR-009	1002012	8	233.008	22	4	47.8091	0.390286	156.75	6.2	7.6	11.4	14.8	18.1	21.9	24.1	23.6	20.9	15.8	10.1	6.5	0.1	0.6	2.2	4.7	7.6	10.8	12.6	12.3	10.3	6.8	3.5	0.9	3.1	4.1	6.8	9.8	12.8	16.3	18.3	17.9	15.6	11.3	6.8	3.7	68	61	57	53
Qpe	T-FR-009	1003013	8	317.442	46	4	47.8091	0.390286	156.75	6.2	7.6	11.4	14.8	18.1	21.9	24.1	23.6	20.9	15.8	10.1	6.5	0.1	0.6	2.2	4.7	7.6	10.8	12.6	12.3	10.3	6.8	3.5	0.9	3.1	4.1	6.8	9.8	12.8	16.3	18.3	17.9	15.6	11.3	6.8	3.7	68	61	57	53
Qpe	T-FR-009	1003014	8	315.862	47	4	47.8091	0.390286	156.75	6.2	7.6	11.4	14.8	18.1	21.9	24.1	23.6	20.9	15.8	10.1	6.5	0.1	0.6	2.2	4.7	7.6	10.8	12.6	12.3	10.3	6.8	3.5	0.9	3.1	4.1	6.8	9.8	12.8	16.3	18.3	17.9	15.6	11.3	6.8	3.7	68	61	57	53
Qpe	T-FR-009	1003018	8	269.703	24	4	47.8091	0.390286	156.75	6.2	7.6	11.4	14.8	18.1	21.9	24.1	23.6	20.9	15.8	10.1	6.5	0.1	0.6	2.2	4.7	7.6	10.8	12.6	12.3	10.3	6.8	3.5	0.9	3.1	4.1	6.8	9.8	12.8	16.3	18.3	17.9	15.6	11.3	6.8	3.7	68	61	57	53
Qpe	T-FR-009	1004019	8	251.452	22	4	47.8091	0.390286	156.75	6.2	7.6	11.4	14.8	18.1	21.9	24.1	23.6	20.9	15.8	10.1	6.5	0.1	0.6	2.2	4.7	7.6	10.8	12.6	12.3	10.3	6.8	3.5	0.9	3.1	4.1	6.8	9.8	12.8	16.3	18.3	17.9	15.6	11.3	6.8	3.7	68	61	57	53
Qpe	T-FR-009	1004021	8	275.053	45	4	47.8091	0.390286	156.75	6.2	7.6	11.4	14.8	18.1	21.9	24.1	23.6	20.9	15.8	10.1	6.5	0.1	0.6	2.2	4.7	7.6	10.8	12.6	12.3	10.3	6.8	3.5	0.9	3.1	4.1	6.8	9.8	12.8	16.3	18.3	17.9	15.6	11.3	6.8	3.7	68	61	57	53
Qpe	T-FR-009	1004024	8	295.775	24	4	47.8091	0.390286	156.75	6.2	7.6	11.4	14.8	18.1	21.9	24.1	23.6	20.9	15.8	10.1	6.5	0.1	0.6	2.2	4.7	7.6	10.8	12.6	12.3	10.3	6.8	3.5	0.9	3.1	4.1	6.8	9.8	12.8	16.3	18.3	17.9	15.6	11.3	6.8	3.7	68	61	57	53
Qpe	T-FR-009	1005026	8	228.421	23	4	47.8091	0.390286	156.75	6.2	7.6	11.4	14.8	18.1	21.9	24.1	23.6	20.9	15.8	10.1	6.5	0.1	0.6	2.2	4.7	7.6	10.8	12.6	12.3	10.3	6.8	3.5	0.9	3.1	4.1	6.8	9.8	12.8	16.3	18.3	17.9	15.6	11.3	6.8	3.7	68	61	57	53
Qpe	T-FR-009	1005027	8	230.236	24	4	47.8091	0.390286	156.75	6.2	7.6	11.4	14.8	18.1	21.9	24.1	23.6	20.9	15.8	10.1	6.5	0.1	0.6	2.2	4.7	7.6	10.8	12.6	12.3	10.3	6.8	3.5	0.9	3.1	4.1	6.8	9.8	12.8	16.3	18.3	17.9	15.6	11.3	6.8	3.7	68	61	57	53
Qpe	T-FR-009	1005028	8	287.372	23	4	47.8091	0.390286	156.75	6.2	7.6	11.4	14.8	18.1	21.9	24.1	23.6	20.9	15.8	10.1	6.5	0.1	0.6	2.2	4.7	7.6	10.8	12.6	12.3	10.3	6.8	3.5	0.9	3.1	4.1	6.8	9.8	12.8	16.3	18.3	17.9	15.6	11.3	6.8	3.7	68	61	57	53
Qpe	T-FR-009	1005030	8	273.278	22	4	47.8091	0.390286	156.75	6.2	7.6	11.4	14.8	18.1	21.9	24.1	23.6	20.9	15.8	10.1	6.5	0.1	0.6	2.2	4.7	7.6	10.8	12.6	12.3	10.3	6.8	3.5	0.9	3.1	4.1	6.8	9.8	12.8	16.3	18.3	17.9	15.6	11.3	6.8	3.7	68	61	57	53
Qpe	T-FR-009	2001001	8	301.404	21	4	47.8091	0.390286	156.75	6.2	7.6	11.4	14.8	18.1	21.9	24.1	23.6	20.9	15.8	10.1	6.5	0.1	0.6	2.2	4.7	7.6	10.8	12.6	12.3	10.3	6.8	3.5	0.9	3.1	4.1	6.8	9.8	12.8	16.3	18.3	17.9	15.6	11.3	6.8	3.7	68	61	57	53
Qpe	T-FR-009	2001002	8	200.65	19	4	47.8091	0.390286	156.75	6.2	7.6	11.4	14.8	18.1	21.9	24.1	23.6	20.9	15.8	10.1	6.5	0.1	0.6	2.2	4.7	7.6	10.8	12.6	12.3	10.3	6.8	3.5	0.9	3.1	4.1	6.8	9.8	12.8	16.3	18.3	17.9	15.6	11.3	6.8	3.7	68	61	57	53
Qpe	T-FR-009	2001003	8	301.978	23	4	47.8091	0.390286	156.75	6.2	7.6	11.4	14.8	18.1	21.9	24.1	23.6	20.9	15.8	10.1	6.5	0.1	0.6	2.2	4.7	7.6	10.8	12.6	12.3	10.3	6.8	3.5	0.9	3.1	4.1	6.8	9.8	12.8	16.3	18.3	17.9	15.6	11.3	6.8	3.7	68	61	57	53
Qpe	T-FR-009	2001004	8	285.052	23	4	47.8091	0.390286	156.75	6.2	7.6	11.4	14.8	18.1	21.9	24.1	23.6	20.9	15.8	10.1	6.5	0.1	0.6	2.2	4.7	7.6	10.8	12.6	12.3	10.3	6.8	3.5	0.9	3.1	4.1	6.8	9.8	12.8	16.3	18.3	17.9	15.6	11.3	6.8	3.7	68	61	57	53
Qpe	T-FR-009	2002009	8	280.647	21	4	47.8091	0.390286	156.75	6.2	7.6	11.4	14.8	18.1	21.9	24.1	23.6	20.9	15.8	10.1	6.5	0.1	0.6	2.2	4.7	7.6	10.8	12.6	12.3	10.3	6.8	3.5	0.9	3.1	4.1	6.8	9.8	12.8	16.3	18.3	17.9	15.6	11.3	6.8	3.7	68	61	57	53
Qpe	T-FR-009	2002010	8	296.293	20	4	47.8091	0.390286	156.75	6.2	7.6	11.4	14.8	18.1	21.9	24.1	23.6	20.9	15.8	10.1	6.5	0.1	0.6	2.2	4.7	7.6	10.8	12.6	12.3	10.3	6.8	3.5	0.9	3.1	4.1	6.8	9.8	12.8	16.3	18.3	17.9	15.6	11.3	6.8	3.7	68	61	57	53
Qpe	T-FR-009	2003013	8	297.423	22	4	47.8091	0.390286	156.75	6.2	7.6	11.4	14.8	18.1	21.9	24.1	23.6	20.9	15.8	10.1	6.5	0.1	0.6	2.2	4.7	7.6	10.8	12.6	12.3	10.3	6.8	3.5	0.9	3.1	4.1	6.8	9.8	12.8	16.3	18.3	17.9	15.6	11.3	6.8	3.7	68	61	57	53
Qpe	T-FR-009	2003014	8	334.638	20	4	47.8091	0.390286	156.75	6.2	7.6	11.4	14.8	18.1	21.9	24.1	23.6	20.9	15.8	10.1	6.5	0.1	0.6	2.2	4.7	7.6	10.8	12.6	12.3	10.3	6.8	3.5	0.9	3.1	4.1	6.8	9.8	12.8	16.3	18.3	17.9	15.6	11.3	6.8	3.7	68	61	57	53
Qpe	T-FR-009	2003015	8	261.37	22	4	47.8091	0.390286	156.75	6.2	7.6	11.4	14.8	18.1	21.9	24.1	23.6	20.9	15.8	10.1	6.5	0.1	0.6	2.2	4.7	7.6	10.8	12.6	12.3	10.3	6.8	3.5	0.9	3.1	4.1	6.8	9.8	12.8	16.3	18.3	17.9	15.6	11.3	6.8	3.7	68	61	57	53
Qpe	T-FR-009	2003018	8	254.678	23	4	47.8091	0.390286	156.75	6.2	7.6	11.4	14.8	18.1	21.9	24.1	23.6	20.9	15.8	10.1	6.5	0.1	0.6	2.2	4.7	7.6	10.8	12.6	12.3	10.3	6.8	3.5	0.9	3.1	4.1	6.8	9.8	12.8	16.3	18.3	17.9	15.6	11.3	6.8	3.7	68	61	57	53
Qpe	T-FR-009	2004022	8	312.255	44	4	47.8091	0.390286	156.75	6.2	7.6	11.4	14.8	18.1	21.9	24.1	23.6	20.9	15.8	10.1	6.5	0.1	0.6	2.2	4.7	7.6	10.8	12.6	12.3	10.3	6.8	3.5	0.9	3.1	4.1	6.8	9.8	12.8	16.3	18.3	17.9	15.6	11.3	6.8	3.7	68	61	57	53
Qpe	T-FR-009	2005025	8	326.774	22	4	47.8091	0.390286	156.75	6.2	7.6	11.4	14.8	18.1	21.9	24.1	23.6	20.9	15.8	10.1	6.5	0.1	0.6	2.2	4.7	7.6	10.8	12.6	12.3	10.3	6.8	3.5	0.9	3.1	4.1	6.8	9.8	12.8	16.3	18.3	17.9	15.6	11.3	6.8	3.7	68	61	57	53
Qpe	T-FR-009	2005027	8	361.306	22	4	47.8091	0.390286	156.75	6.2	7.6	11.4	14.8	18.1	21.9	24.1	23.6	20.9	15.8	10.1	6.5	0.1	0.6	2.2	4.7	7.6	10.8	12.6	12.3	10.3	6.8	3.5	0.9	3.1	4.1	6.8	9.8	12.8	16.3	18.3	17.9	15.6	11.3	6.8	3.7	68	61	57	53
Qpe	T-FR-009	2005028	8	341.66	23	4	47.8091	0.390286	156.75	6.2	7.6	11.4	14.8	18.1	21.9	24.1	23.6	20.9	15.8	10.1	6.5	0.1	0.6	2.2	4.7	7.6	10.8	12.6	12.3	10.3	6.8	3.5	0.9	3.1	4.1	6.8	9.8	12.8	16.3	18.3	17.9	15.6	11.3	6.8	3.7	68	61	57	53
Qpe	T-FR-009	2005029	8	355.083	20	4	47.8091	0.390286	156.75	6.2	7.6	11.4	14.8	18.1	21.9	24.1	23.6	20.9	15.8	10.1	6.5	0.1	0.6	2.2	4.7	7.6	10.8	12.6	12.3	10.3	6.8	3.5	0.9	3.1	4.1	6.8	9.8	12.8	16.3	18.3	17.9	15.6	11.3	6.8	3.7	68	61	57	53
Qpe	T-FR-009	2006032	8	327.621	23	4	47.8091	0.390286	156.75	6.2	7.6	11.4	14.8	18.1	21.9	24.1	23.6	20.9	15.8	10.1	6.5	0.1	0.6	2.2	4.7	7.6	10.8	12.6	12.3	10.3	6.8	3.5	0.9	3.1	4.1	6.8	9.8	12.8	16.3	18.3	17.9	15.6	11.3	6.8	3.7	68	61	57	53
Qpe	T-FR-009	2006033	8	206.879	20	4	47.8091	0.390286	156.75	6.2	7.6	11.4	14.8	18.1	21.9	24.1	23.6	20.9	15.8	10.1	6.5	0.1	0.6	2.2	4.7	7.6	10.8	12.6	12.3	10.3	6.8	3.5	0.9	3.1	4.1	6.8	9.8	12.8	16.3	18.3	17.9	15.6	11.3	6.8	3.7	68	61	57	53
Qpe	T-FR-009	2006034	8	359.473	22	4	47.8091	0.390286	156.75	6.2	7.6	11.4	14.8	18.1	21.9	24.1	23.6	20.9	15.8	10.1	6.5	0.1	0.6	2.2	4.7	7.6	10.8	12.6	12.3	10.3	6.8	3.5	0.9	3.1	4.1	6.8	9.8	12.8	16.3	18.3	17.9	15.6	11.3	6.8	3.7	68	61	57	53
Qpe	T-FR-009	2006035	8	216.491	20	4	47.8091	0.390286	156.75	6.2	7.6	11.4	14.8	18.1	21.9	24.1	23.6	20.9	15.8	10.1	6.5	0.1	0.6	2.2	4.7	7.6	10.8	12.6	12.3	10.3	6.8	3.5	0.9	3.1	4.1	6.8	9.8	12.8	16.3	18.3	17.9	15.6	11.3	6.8	3.7	68	61	57	53
Qpe	T-FR-009	2007039	8	225.112	21	4	47.8091	0.390286	156.75	6.2	7.6	11.4	14.8	18.1	21.9	24.1	23.6	20.9	15.8	10.1	6.5	0.1	0.6	2.2	4.7	7.6	10.8	12.6	12.3	10.3	6.8	3.5	0.9	3.1	4.1	6.8	9.8	12.8	16.3	18.3	17.9	15.6	11.3	6.8	3.7	68	61	57	53
Qpe	T-FR-009	2007042	8	198.694	18	4	47.8091	0.390286	156.75	6.2	7.6	11.4	14.8	18.1	21.9	24.1	23.6	20.9	15.8	10.1	6.5	0.1	0.6	2.2	4.7	7.6	10.8	12.6	12.3	10.3	6.8	3.5	0.9	3.1	4.1	6.8	9.8	12.8	16.3	18.3	17.9	15.6	11.3	6.8	3.7	68	61	57	53
Qpe	T-FR-009	2008043	8	307.779	45	4	47.8091	0.390286	156.75	6.2	7.6	11.4	14.8	18.1	21.9	24.1	23.6	20.9	15.8	10.1	6.5	0.1	0.6	2.2	4.7	7.6	10.8	12.6	12.3	10.3	6.8	3.5	0.9	3.1	4.1	6.8	9.8	12.8	16.3	18.3	17.9	15.6	11.3	6.8	3.7	68	61	57	53
Qpe	T-FR-009	2008044	8	311.758	23	4	47.8091	0.390286	156.75	6.2	7.6	11.4	14.8	18.1	21.9	24.1	23.6	20.9	15.8	10.1	6.5	0.1	0.6	2.2	4.7	7.6	10.8	12.6	12.3	10.3	6.8	3.5	0.9	3.1	4.1	6.8	9.8	12.8	16.3	18.3	17.9	15.6	11.3	6.8	3.7	68	61	57	53
Qpe	T-FR-009	2008048	8	332.461	23	4	47.8091	0.390286	156.75	6.2	7.6	11.4	14.8	18.1	21.9	24.1	23.6	20.9	15.8	10.1	6.5	0.1	0.6	2.2	4.7	7.6	10.8	12.6	12.3	10.3	6.8	3.5	0.9	3.1	4.1	6.8	9.8	12.8	16.3	18.3	17.9	15.6	11.3	6.8	3.7	68	61	57	53
Qpe	T-FR-009	2009050	8	306.752	24	4	47.8091	0.390286	156.75	6.2	7.6	11.4	14.8	18.1	21.9	24.1	23.6	20.9	15.8	10.1	6.5	0.1	0.6	2.2	4.7	7.6	10.8	12.6	12.3	10.3	6.8	3.5	0.9	3.1	4.1	6.8	9.8	12.8	16.3	18.3	17.9	15.6	11.3	6.8	3.7	68	61	57	53
Qpe	T-FR-009	2009051	8	305.217	23	4	47.8091	0.390286	156.75	6.2	7.6	11.4	14.8	18.1	21.9	24.1	23.6	20.9	15.8	10.1	6.5	0.1	0.6	2.2	4.7	7.6	10.8	12.6	12.3	10.3	6.8	3.5	0.9	3.1	4.1	6.8	9.8	12.8	16.3	18.3	17.9	15.6	11.3	6.8	3.7	68	61	57	53
Qpe	T-FR-009	2010055	8	145.27	16	4	47.8091	0.390286	156.75	6.2	7.6	11.4	14.8	18.1	21.9	24.1	23.6	20.9	15.8	10.1	6.5	0.1	0.6	2.2	4.7	7.6	10.8	12.6	12.3	10.3	6.8	3.5	0.9	3.1	4.1	6.8	9.8	12.8	16.3	18.3	17.9	15.6	11.3	6.8	3.7	68	61	57	53
Qpe	T-FR-009	2010056	8	242.237	14	4	47.8091	0.390286	156.75	6.2	7.6	11.4	14.8	18.1	21.9	24.1	23.6	20.9	15.8	10.1	6.5	0.1	0.6	2.2	4.7	7.6	10.8	12.6	12.3	10.3	6.8	3.5	0.9	3.1	4.1	6.8	9.8	12.8	16.3	18.3	17.9	15.6	11.3	6.8	3.7	68	61	57	53
Qpe	T-FR-009	2010058	8	201.311	18	4	47.8091	0.390286	156.75	6.2	7.6	11.4	14.8	18.1	21.9	24.1	23.6	20.9	15.8	10.1	6.5	0.1	0.6	2.2	4.7	7.6	10.8	12.6	12.3	10.3	6.8	3.5	0.9	3.1	4.1	6.8	9.8	12.8	16.3	18.3	17.9	15.6	11.3	6.8	3.7	68	61	57	53
Qpe	T-FR-009	2010060	8	171.485	16	4	47.8091	0.390286	156.75	6.2	7.6	11.4	14.8	18.1	21.9	24.1	23.6	20.9	15.8	10.1	6.5	0.1	0.6	2.2	4.7	7.6	10.8	12.6	12.3	10.3	6.8	3.5	0.9	3.1	4.1	6.8	9.8	12.8	16.3	18.3	17.9	15.6	11.3	6.8	3.7	68	61	57	53
Qpe	T-FR-009	4001003	8	222.771	21	4	47.8091	0.390286	156.75	6.2	7.6	11.4	14.8	18.1	21.9	24.1	23.6	20.9	15.8	10.1	6.5	0.1	0.6	2.2	4.7	7.6	10.8	12.6	12.3	10.3	6.8	3.5	0.9	3.1	4.1	6.8	9.8	12.8	16.3	18.3	17.9	15.6	11.3	6.8	3.7	68	61	57	53
Qpe	T-FR-009	4001009	8	229.727	22	4	47.8091	0.390286	156.75	6.2	7.6	11.4	14.8	18.1	21.9	24.1	23.6	20.9	15.8	10.1	6.5	0.1	0.6	2.2	4.7	7.6	10.8	12.6	12.3	10.3	6.8	3.5	0.9	3.1	4.1	6.8	9.8	12.8	16.3	18.3	17.9	15.6	11.3	6.8	3.7	68	61	57	53
Qpe	T-FR-009	4001017	8	198.537	19	4	47.8091	0.390286	156.75	6.2	7.6	11.4	14.8	18.1	21.9	24.1	23.6	20.9	15.8	10.1	6.5	0.1	0.6	2.2	4.7	7.6	10.8	12.6	12.3	10.3	6.8	3.5	0.9	3.1	4.1	6.8	9.8	12.8	16.3	18.3	17.9	15.6	11.3	6.8	3.7	68	61	57	53
Qpe	T-FR-009	4002020	8	179.057	21	4	47.8091	0.390286	156.75	6.2	7.6	11.4	14.8	18.1	21.9	24.1	23.6	20.9	15.8	10.1	6.5	0.1	0.6	2.2	4.7	7.6	10.8	12.6	12.3	10.3	6.8	3.5	0.9	3.1	4.1	6.8	9.8	12.8	16.3	18.3	17.9	15.6	11.3	6.8	3.7	68	61	57	53
Qpe	T-FR-009	4002030	8	267.527	22	4	47.8091	0.390286	156.75	6.2	7.6	11.4	14.8	18.1	21.9	24.1	23.6	20.9	15.8	10.1	6.5	0.1	0.6	2.2	4.7	7.6	10.8	12.6	12.3	10.3	6.8	3.5	0.9	3.1	4.1	6.8	9.8	12.8	16.3	18.3	17.9	15.6	11.3	6.8	3.7	68	61	57	53
Qpe	T-FR-009	4002033	8	190.152	21	4	47.8091	0.390286	156.75	6.2	7.6	11.4	14.8	18.1	21.9	24.1	23.6	20.9	15.8	10.1	6.5	0.1	0.6	2.2	4.7	7.6	10.8	12.6	12.3	10.3	6.8	3.5	0.9	3.1	4.1	6.8	9.8	12.8	16.3	18.3	17.9	15.6	11.3	6.8	3.7	68	61	57	53
Qpe	T-FR-009	4003035	8	257.391	23	4	47.8091	0.390286	156.75	6.2	7.6	11.4	14.8	18.1	21.9	24.1	23.6	20.9	15.8	10.1	6.5	0.1	0.6	2.2	4.7	7.6	10.8	12.6	12.3	10.3	6.8	3.5	0.9	3.1	4.1	6.8	9.8	12.8	16.3	18.3	17.9	15.6	11.3	6.8	3.7	68	61	57	53
Qpe	T-FR-009	4003038	8	243.692	24	4	47.8091	0.390286	156.75	6.2	7.6	11.4	14.8	18.1	21.9	24.1	23.6	20.9	15.8	10.1	6.5	0.1	0.6	2.2	4.7	7.6	10.8	12.6	12.3	10.3	6.8	3.5	0.9	3.1	4.1	6.8	9.8	12.8	16.3	18.3	17.9	15.6	11.3	6.8	3.7	68	61	57	53
Qpe	T-FR-009	4003049	8	264.124	21	4	47.8091	0.390286	156.75	6.2	7.6	11.4	14.8	18.1	21.9	24.1	23.6	20.9	15.8	10.1	6.5	0.1	0.6	2.2	4.7	7.6	10.8	12.6	12.3	10.3	6.8	3.5	0.9	3.1	4.1	6.8	9.8	12.8	16.3	18.3	17.9	15.6	11.3	6.8	3.7	68	61	57	53
Qpe	T-FR-009	4004064	8	332.442	19	4	47.8091	0.390286	156.75	6.2	7.6	11.4	14.8	18.1	21.9	24.1	23.6	20.9	15.8	10.1	6.5	0.1	0.6	2.2	4.7	7.6	10.8	12.6	12.3	10.3	6.8	3.5	0.9	3.1	4.1	6.8	9.8	12.8	16.3	18.3	17.9	15.6	11.3	6.8	3.7	68	61	57	53
Qpe	T-FR-009	4004066	8	280.758	24	4	47.8091	0.390286	156.75	6.2	7.6	11.4	14.8	18.1	21.9	24.1	23.6	20.9	15.8	10.1	6.5	0.1	0.6	2.2	4.7	7.6	10.8	12.6	12.3	10.3	6.8	3.5	0.9	3.1	4.1	6.8	9.8	12.8	16.3	18.3	17.9	15.6	11.3	6.8	3.7	68	61	57	53
Qpe	T-FR-009	4004067	8	338.409	22	4	47.8091	0.390286	156.75	6.2	7.6	11.4	14.8	18.1	21.9	24.1	23.6	20.9	15.8	10.1	6.5	0.1	0.6	2.2	4.7	7.6	10.8	12.6	12.3	10.3	6.8	3.5	0.9	3.1	4.1	6.8	9.8	12.8	16.3	18.3	17.9	15.6	11.3	6.8	3.7	68	61	57	53
Qpe	T-FR-009	4005078	8	292.362	21	4	47.8091	0.390286	156.75	6.2	7.6	11.4	14.8	18.1	21.9	24.1	23.6	20.9	15.8	10.1	6.5	0.1	0.6	2.2	4.7	7.6	10.8	12.6	12.3	10.3	6.8	3.5	0.9	3.1	4.1	6.8	9.8	12.8	16.3	18.3	17.9	15.6	11.3	6.8	3.7	68	61	57	53
Qpe	T-FR-009	4005084	8	313.018	22	4	47.8091	0.390286	156.75	6.2	7.6	11.4	14.8	18.1	21.9	24.1	23.6	20.9	15.8	10.1	6.5	0.1	0.6	2.2	4.7	7.6	10.8	12.6	12.3	10.3	6.8	3.5	0.9	3.1	4.1	6.8	9.8	12.8	16.3	18.3	17.9	15.6	11.3	6.8	3.7	68	61	57	53
Qpe	T-FR-009	4005085	8	297.625	24	4	47.8091	0.390286	156.75	6.2	7.6	11.4	14.8	18.1	21.9	24.1	23.6	20.9	15.8	10.1	6.5	0.1	0.6	2.2	4.7	7.6	10.8	12.6	12.3	10.3	6.8	3.5	0.9	3.1	4.1	6.8	9.8	12.8	16.3	18.3	17.9	15.6	11.3	6.8	3.7	68	61	57	53
Qpe	T-FR-009	5001001	8	297.106	22	4	47.8091	0.390286	156.75	6.2	7.6	11.4	14.8	18.1	21.9	24.1	23.6	20.9	15.8	10.1	6.5	0.1	0.6	2.2	4.7	7.6	10.8	12.6	12.3	10.3	6.8	3.5	0.9	3.1	4.1	6.8	9.8	12.8	16.3	18.3	17.9	15.6	11.3	6.8	3.7	68	61	57	53
Qpe	T-FR-009	5001003	8	298.508	21	4	47.8091	0.390286	156.75	6.2	7.6	11.4	14.8	18.1	21.9	24.1	23.6	20.9	15.8	10.1	6.5	0.1	0.6	2.2	4.7	7.6	10.8	12.6	12.3	10.3	6.8	3.5	0.9	3.1	4.1	6.8	9.8	12.8	16.3	18.3	17.9	15.6	11.3	6.8	3.7	68	61	57	53
Qpe	T-FR-009	5001005	8	301.742	22	4	47.8091	0.390286	156.75	6.2	7.6	11.4	14.8	18.1	21.9	24.1	23.6	20.9	15.8	10.1	6.5	0.1	0.6	2.2	4.7	7.6	10.8	12.6	12.3	10.3	6.8	3.5	0.9	3.1	4.1	6.8	9.8	12.8	16.3	18.3	17.9	15.6	11.3	6.8	3.7	68	61	57	53
Qpe	T-FR-009	5001006	8	297.101	23	4	47.8091	0.390286	156.75	6.2	7.6	11.4	14.8	18.1	21.9	24.1	23.6	20.9	15.8	10.1	6.5	0.1	0.6	2.2	4.7	7.6	10.8	12.6	12.3	10.3	6.8	3.5	0.9	3.1	4.1	6.8	9.8	12.8	16.3	18.3	17.9	15.6	11.3	6.8	3.7	68	61	57	53
Qpe	T-FR-009	5001007	8	309.841	23	4	47.8091	0.390286	156.75	6.2	7.6	11.4	14.8	18.1	21.9	24.1	23.6	20.9	15.8	10.1	6.5	0.1	0.6	2.2	4.7	7.6	10.8	12.6	12.3	10.3	6.8	3.5	0.9	3.1	4.1	6.8	9.8	12.8	16.3	18.3	17.9	15.6	11.3	6.8	3.7	68	61	57	53
Qpe	T-FR-009	5002011	8	270.803	22	4	47.8091	0.390286	156.75	6.2	7.6	11.4	14.8	18.1	21.9	24.1	23.6	20.9	15.8	10.1	6.5	0.1	0.6	2.2	4.7	7.6	10.8	12.6	12.3	10.3	6.8	3.5	0.9	3.1	4.1	6.8	9.8	12.8	16.3	18.3	17.9	15.6	11.3	6.8	3.7	68	61	57	53
Qpe	T-FR-009	5002012	8	350.842	19	4	47.8091	0.390286	156.75	6.2	7.6	11.4	14.8	18.1	21.9	24.1	23.6	20.9	15.8	10.1	6.5	0.1	0.6	2.2	4.7	7.6	10.8	12.6	12.3	10.3	6.8	3.5	0.9	3.1	4.1	6.8	9.8	12.8	16.3	18.3	17.9	15.6	11.3	6.8	3.7	68	61	57	53
Qpe	T-FR-009	4001003	8	225.858	24	41	56.1315	9.396	250	1.3	1.9	4.1	7.8	13.6	16.9	17.9	18.1	14.6	10.5	6	2.9	-6	-6	-2.9	1.3	6.1	9.4	11	10.2	7.8	4.5	-0.4	-0.8	-2.4	-2	0.6	4.6	9.8	13.1	14.5	14.1	11.2	7.5	2.8	1.1	61	42	47	47
Qpe	T-FR-009	4001013	8	217.652	23	41	56.1315	9.396	250	1.3	1.9	4.1	7.8	13.6	16.9	17.9	18.1	14.6	10.5	6	2.9	-6	-6	-2.9	1.3	6.1	9.4	11	10.2	7.8	4.5	-0.4	-0.8	-2.4	-2	0.6	4.6	9.8	13.1	14.5	14.1	11.2	7.5	2.8	1.1	61	42	47	47
Qpe	T-FR-009	4002023	8	214.87	23	41	56.1315	9.396	250	1.3	1.9	4.1	7.8	13.6	16.9	17.9	18.1	14.6	10.5	6	2.9	-6	-6	-2.9	1.3	6.1	9.4	11	10.2	7.8	4.5	-0.4	-0.8	-2.4	-2	0.6	4.6	9.8	13.1	14.5	14.1	11.2	7.5	2.8	1.1	61	42	47	47
Qpe	T-FR-009	4002026	8	186.927	22	41	56.1315	9.396	250	1.3	1.9	4.1	7.8	13.6	16.9	17.9	18.1	14.6	10.5	6	2.9	-6	-6	-2.9	1.3	6.1	9.4	11	10.2	7.8	4.5	-0.4	-0.8	-2.4	-2	0.6	4.6	9.8	13.1	14.5	14.1	11.2	7.5	2.8	1.1	61	42	47	47
Qpe	T-FR-009	4003039	8	227.333	24	41	56.1315	9.396	250	1.3	1.9	4.1	7.8	13.6	16.9	17.9	18.1	14.6	10.5	6	2.9	-6	-6	-2.9	1.3	6.1	9.4	11	10.2	7.8	4.5	-0.4	-0.8	-2.4	-2	0.6	4.6	9.8	13.1	14.5	14.1	11.2	7.5	2.8	1.1	61	42	47	47
Qpe	T-FR-009	4003047	8	369.091	22	41	56.1315	9.396	250	1.3	1.9	4.1	7.8	13.6	16.9	17.9	18.1	14.6	10.5	6	2.9	-6	-6	-2.9	1.3	6.1	9.4	11	10.2	7.8	4.5	-0.4	-0.8	-2.4	-2	0.6	4.6	9.8	13.1	14.5	14.1	11.2	7.5	2.8	1.1	61	42	47	47
Qpe	T-FR-009	4004053	8	260.917	24	41	56.1315	9.396	250	1.3	1.9	4.1	7.8	13.6	16.9	17.9	18.1	14.6	10.5	6	2.9	-6	-6	-2.9	1.3	6.1	9.4	11	10.2	7.8	4.5	-0.4	-0.8	-2.4	-2	0.6	4.6	9.8	13.1	14.5	14.1	11.2	7.5	2.8	1.1	61	42	47	47
Qpe	T-FR-009	4004058	8	283.626	23	41	56.1315	9.396	250	1.3	1.9	4.1	7.8	13.6	16.9	17.9	18.1	14.6	10.5	6	2.9	-6	-6	-2.9	1.3	6.1	9.4	11	10.2	7.8	4.5	-0.4	-0.8	-2.4	-2	0.6	4.6	9.8	13.1	14.5	14.1	11.2	7.5	2.8	1.1	61	42	47	47
Qpe	T-FR-009	4005073	8	233.56	20	41	56.1315	9.396	250	1.3	1.9	4.1	7.8	13.6	16.9	17.9	18.1	14.6	10.5	6	2.9	-6	-6	-2.9	1.3	6.1	9.4	11	10.2	7.8	4.5	-0.4	-0.8	-2.4	-2	0.6	4.6	9.8	13.1	14.5	14.1	11.2	7.5	2.8	1.1	61	42	47	47
Qpe	T-FR-009	4005075	8	255.383	23	41	56.1315	9.396	250	1.3	1.9	4.1	7.8	13.6	16.9	17.9	18.1	14.6	10.5	6	2.9	-6	-6	-2.9	1.3	6.1	9.4	11	10.2	7.8	4.5	-0.4	-0.8	-2.4	-2	0.6	4.6	9.8	13.1	14.5	14.1	11.2	7.5	2.8	1.1	61	42	47	47
Qpe	T-FR-009	1001003	8	167.758	20	50	46.604	0.178	130	6.9	8.3	12.3	15.4	18.5	22.5	24.6	24.1	21.8	16.6	11	7.3	0.6	1.2	2.8	5.3	8	11.4	13.2	12.8	11.1	7.4	4.1	1.3	3.7	4.7	7.5	10.3	13.2	16.9	18.9	18.5	16.4	12	7.5	4.3	70	62	57	53
Qpe	T-FR-009	1001006	8	261.43	23	50	46.604	0.178	130	6.9	8.3	12.3	15.4	18.5	22.5	24.6	24.1	21.8	16.6	11	7.3	0.6	1.2	2.8	5.3	8	11.4	13.2	12.8	11.1	7.4	4.1	1.3	3.7	4.7	7.5	10.3	13.2	16.9	18.9	18.5	16.4	12	7.5	4.3	70	62	57	53
Qpe	T-FR-009	1002007	8	203.415	21	50	46.604	0.178	130	6.9	8.3	12.3	15.4	18.5	22.5	24.6	24.1	21.8	16.6	11	7.3	0.6	1.2	2.8	5.3	8	11.4	13.2	12.8	11.1	7.4	4.1	1.3	3.7	4.7	7.5	10.3	13.2	16.9	18.9	18.5	16.4	12	7.5	4.3	70	62	57	53
Qpe	T-FR-009	1002010	8	190.996	18	50	46.604	0.178	130	6.9	8.3	12.3	15.4	18.5	22.5	24.6	24.1	21.8	16.6	11	7.3	0.6	1.2	2.8	5.3	8	11.4	13.2	12.8	11.1	7.4	4.1	1.3	3.7	4.7	7.5	10.3	13.2	16.9	18.9	18.5	16.4	12	7.5	4.3	70	62	57	53
Qpe	T-FR-009	1003015	8	200.332	22	50	46.604	0.178	130	6.9	8.3	12.3	15.4	18.5	22.5	24.6	24.1	21.8	16.6	11	7.3	0.6	1.2	2.8	5.3	8	11.4	13.2	12.8	11.1	7.4	4.1	1.3	3.7	4.7	7.5	10.3	13.2	16.9	18.9	18.5	16.4	12	7.5	4.3	70	62	57	53
Qpe	T-FR-009	1003018	8	247.812	23	50	46.604	0.178	130	6.9	8.3	12.3	15.4	18.5	22.5	24.6	24.1	21.8	16.6	11	7.3	0.6	1.2	2.8	5.3	8	11.4	13.2	12.8	11.1	7.4	4.1	1.3	3.7	4.7	7.5	10.3	13.2	16.9	18.9	18.5	16.4	12	7.5	4.3	70	62	57	53
Qpe	T-FR-009	1004022	8	206.819	22	50	46.604	0.178	130	6.9	8.3	12.3	15.4	18.5	22.5	24.6	24.1	21.8	16.6	11	7.3	0.6	1.2	2.8	5.3	8	11.4	13.2	12.8	11.1	7.4	4.1	1.3	3.7	4.7	7.5	10.3	13.2	16.9	18.9	18.5	16.4	12	7.5	4.3	70	62	57	53
Qpe	T-FR-009	1004024	8	223.083	22	50	46.604	0.178	130	6.9	8.3	12.3	15.4	18.5	22.5	24.6	24.1	21.8	16.6	11	7.3	0.6	1.2	2.8	5.3	8	11.4	13.2	12.8	11.1	7.4	4.1	1.3	3.7	4.7	7.5	10.3	13.2	16.9	18.9	18.5	16.4	12	7.5	4.3	70	62	57	53
Qpe	T-FR-009	1005027	8	226.418	23	50	46.604	0.178	130	6.9	8.3	12.3	15.4	18.5	22.5	24.6	24.1	21.8	16.6	11	7.3	0.6	1.2	2.8	5.3	8	11.4	13.2	12.8	11.1	7.4	4.1	1.3	3.7	4.7	7.5	10.3	13.2	16.9	18.9	18.5	16.4	12	7.5	4.3	70	62	57	53
Qpe	T-FR-009	1005028	8	214.259	21	50	46.604	0.178	130	6.9	8.3	12.3	15.4	18.5	22.5	24.6	24.1	21.8	16.6	11	7.3	0.6	1.2	2.8	5.3	8	11.4	13.2	12.8	11.1	7.4	4.1	1.3	3.7	4.7	7.5	10.3	13.2	16.9	18.9	18.5	16.4	12	7.5	4.3	70	62	57	53
Qpe	T-FR-009	4001013	8	258.533	21	61	51.769	7.174	75	3.9	5	8.3	12.8	17.4	20.5	21.9	21.5	18.9	14.4	7.9	4.9	-0.9	-0.6	1.6	4.1	7.9	10.8	12.5	12	9.7	6.8	2.8	0.2	1.5	2.2	5	8.5	12.7	15.7	17.2	16.7	14.3	10.6	5.4	2.5	71	49	64	55
Qpe	T-FR-009	4001017	8	268.817	23	61	51.769	7.174	75	3.9	5	8.3	12.8	17.4	20.5	21.9	21.5	18.9	14.4	7.9	4.9	-0.9	-0.6	1.6	4.1	7.9	10.8	12.5	12	9.7	6.8	2.8	0.2	1.5	2.2	5	8.5	12.7	15.7	17.2	16.7	14.3	10.6	5.4	2.5	71	49	64	55
Qpe	T-FR-009	4002025	8	325.282	22	61	51.769	7.174	75	3.9	5	8.3	12.8	17.4	20.5	21.9	21.5	18.9	14.4	7.9	4.9	-0.9	-0.6	1.6	4.1	7.9	10.8	12.5	12	9.7	6.8	2.8	0.2	1.5	2.2	5	8.5	12.7	15.7	17.2	16.7	14.3	10.6	5.4	2.5	71	49	64	55
Qpe	T-FR-009	4002032	8	302.491	22	61	51.769	7.174	75	3.9	5	8.3	12.8	17.4	20.5	21.9	21.5	18.9	14.4	7.9	4.9	-0.9	-0.6	1.6	4.1	7.9	10.8	12.5	12	9.7	6.8	2.8	0.2	1.5	2.2	5	8.5	12.7	15.7	17.2	16.7	14.3	10.6	5.4	2.5	71	49	64	55
Qpe	T-FR-009	4003043	8	256.55	24	61	51.769	7.174	75	3.9	5	8.3	12.8	17.4	20.5	21.9	21.5	18.9	14.4	7.9	4.9	-0.9	-0.6	1.6	4.1	7.9	10.8	12.5	12	9.7	6.8	2.8	0.2	1.5	2.2	5	8.5	12.7	15.7	17.2	16.7	14.3	10.6	5.4	2.5	71	49	64	55
Qpe	T-FR-009	4004051	8	312.818	22	61	51.769	7.174	75	3.9	5	8.3	12.8	17.4	20.5	21.9	21.5	18.9	14.4	7.9	4.9	-0.9	-0.6	1.6	4.1	7.9	10.8	12.5	12	9.7	6.8	2.8	0.2	1.5	2.2	5	8.5	12.7	15.7	17.2	16.7	14.3	10.6	5.4	2.5	71	49	64	55
Qpe	T-FR-009	4004052	8	355.408	24	61	51.769	7.174	75	3.9	5	8.3	12.8	17.4	20.5	21.9	21.5	18.9	14.4	7.9	4.9	-0.9	-0.6	1.6	4.1	7.9	10.8	12.5	12	9.7	6.8	2.8	0.2	1.5	2.2	5	8.5	12.7	15.7	17.2	16.7	14.3	10.6	5.4	2.5	71	49	64	55
Qpe	T-FR-009	4004059	8	282.383	23	61	51.769	7.174	75	3.9	5	8.3	12.8	17.4	20.5	21.9	21.5	18.9	14.4	7.9	4.9	-0.9	-0.6	1.6	4.1	7.9	10.8	12.5	12	9.7	6.8	2.8	0.2	1.5	2.2	5	8.5	12.7	15.7	17.2	16.7	14.3	10.6	5.4	2.5	71	49	64	55
Qpe	T-FR-009	4005070	8	304.304	23	61	51.769	7.174	75	3.9	5	8.3	12.8	17.4	20.5	21.9	21.5	18.9	14.4	7.9	4.9	-0.9	-0.6	1.6	4.1	7.9	10.8	12.5	12	9.7	6.8	2.8	0.2	1.5	2.2	5	8.5	12.7	15.7	17.2	16.7	14.3	10.6	5.4	2.5	71	49	64	55
Qpe	T-FR-009	4005080	8	274.1	24	61	51.769	7.174	75	3.9	5	8.3	12.8	17.4	20.5	21.9	21.5	18.9	14.4	7.9	4.9	-0.9	-0.6	1.6	4.1	7.9	10.8	12.5	12	9.7	6.8	2.8	0.2	1.5	2.2	5	8.5	12.7	15.7	17.2	16.7	14.3	10.6	5.4	2.5	71	49	64	55
Qpe	T-FR-009	2001001	8	267.473	20	77	47.761	5.487	330	3.4	5.3	10	14.1	17.8	21.1	23.4	22.9	20.1	14.5	8.2	3.9	-1.8	-1.3	1.3	4.4	7.7	11.1	12.9	12.5	10.4	6.2	2	-0.9	0.8	2	5.6	9.2	12.7	16.1	18.1	17.7	15.3	10.4	5.1	1.5	83	71	72	56
Qpe	T-FR-009	2002009	8	305.03	22	77	47.761	5.487	330	3.4	5.3	10	14.1	17.8	21.1	23.4	22.9	20.1	14.5	8.2	3.9	-1.8	-1.3	1.3	4.4	7.7	11.1	12.9	12.5	10.4	6.2	2	-0.9	0.8	2	5.6	9.2	12.7	16.1	18.1	17.7	15.3	10.4	5.1	1.5	83	71	72	56
Qpe	T-FR-009	2003014	8	291.835	23	77	47.761	5.487	330	3.4	5.3	10	14.1	17.8	21.1	23.4	22.9	20.1	14.5	8.2	3.9	-1.8	-1.3	1.3	4.4	7.7	11.1	12.9	12.5	10.4	6.2	2	-0.9	0.8	2	5.6	9.2	12.7	16.1	18.1	17.7	15.3	10.4	5.1	1.5	83	71	72	56
Qpe	T-FR-009	2004023	8	236.864	23	77	47.761	5.487	330	3.4	5.3	10	14.1	17.8	21.1	23.4	22.9	20.1	14.5	8.2	3.9	-1.8	-1.3	1.3	4.4	7.7	11.1	12.9	12.5	10.4	6.2	2	-0.9	0.8	2	5.6	9.2	12.7	16.1	18.1	17.7	15.3	10.4	5.1	1.5	83	71	72	56
Qpe	T-FR-009	2005028	8	310.458	22	77	47.761	5.487	330	3.4	5.3	10	14.1	17.8	21.1	23.4	22.9	20.1	14.5	8.2	3.9	-1.8	-1.3	1.3	4.4	7.7	11.1	12.9	12.5	10.4	6.2	2	-0.9	0.8	2	5.6	9.2	12.7	16.1	18.1	17.7	15.3	10.4	5.1	1.5	83	71	72	56
Qpe	T-FR-009	2006035	8	189.39	18	77	47.761	5.487	330	3.4	5.3	10	14.1	17.8	21.1	23.4	22.9	20.1	14.5	8.2	3.9	-1.8	-1.3	1.3	4.4	7.7	11.1	12.9	12.5	10.4	6.2	2	-0.9	0.8	2	5.6	9.2	12.7	16.1	18.1	17.7	15.3	10.4	5.1	1.5	83	71	72	56
Qpe	T-FR-009	2007038	8	246.309	20	77	47.761	5.487	330	3.4	5.3	10	14.1	17.8	21.1	23.4	22.9	20.1	14.5	8.2	3.9	-1.8	-1.3	1.3	4.4	7.7	11.1	12.9	12.5	10.4	6.2	2	-0.9	0.8	2	5.6	9.2	12.7	16.1	18.1	17.7	15.3	10.4	5.1	1.5	83	71	72	56
Qpe	T-FR-009	2008047	8	244.034	16	77	47.761	5.487	330	3.4	5.3	10	14.1	17.8	21.1	23.4	22.9	20.1	14.5	8.2	3.9	-1.8	-1.3	1.3	4.4	7.7	11.1	12.9	12.5	10.4	6.2	2	-0.9	0.8	2	5.6	9.2	12.7	16.1	18.1	17.7	15.3	10.4	5.1	1.5	83	71	72	56
Qpe	T-FR-009	2009052	8	303.755	19	77	47.761	5.487	330	3.4	5.3	10	14.1	17.8	21.1	23.4	22.9	20.1	14.5	8.2	3.9	-1.8	-1.3	1.3	4.4	7.7	11.1	12.9	12.5	10.4	6.2	2	-0.9	0.8	2	5.6	9.2	12.7	16.1	18.1	17.7	15.3	10.4	5.1	1.5	83	71	72	56
Qpe	T-FR-009	2010056	8	139.942	16	77	47.761	5.487	330	3.4	5.3	10	14.1	17.8	21.1	23.4	22.9	20.1	14.5	8.2	3.9	-1.8	-1.3	1.3	4.4	7.7	11.1	12.9	12.5	10.4	6.2	2	-0.9	0.8	2	5.6	9.2	12.7	16.1	18.1	17.7	15.3	10.4	5.1	1.5	83	71	72	56
Qpe	T-FR-009	4001006	8	296.809	22	77	47.761	5.487	330	3.4	5.3	10	14.1	17.8	21.1	23.4	22.9	20.1	14.5	8.2	3.9	-1.8	-1.3	1.3	4.4	7.7	11.1	12.9	12.5	10.4	6.2	2	-0.9	0.8	2	5.6	9.2	12.7	16.1	18.1	17.7	15.3	10.4	5.1	1.5	83	71	72	56
Qpe	T-FR-009	4001008	8	302.543	21	77	47.761	5.487	330	3.4	5.3	10	14.1	17.8	21.1	23.4	22.9	20.1	14.5	8.2	3.9	-1.8	-1.3	1.3	4.4	7.7	11.1	12.9	12.5	10.4	6.2	2	-0.9	0.8	2	5.6	9.2	12.7	16.1	18.1	17.7	15.3	10.4	5.1	1.5	83	71	72	56
Qpe	T-FR-009	4002024	8	319.409	23	77	47.761	5.487	330	3.4	5.3	10	14.1	17.8	21.1	23.4	22.9	20.1	14.5	8.2	3.9	-1.8	-1.3	1.3	4.4	7.7	11.1	12.9	12.5	10.4	6.2	2	-0.9	0.8	2	5.6	9.2	12.7	16.1	18.1	17.7	15.3	10.4	5.1	1.5	83	71	72	56
Qpe	T-FR-009	4002033	8	221.676	21	77	47.761	5.487	330	3.4	5.3	10	14.1	17.8	21.1	23.4	22.9	20.1	14.5	8.2	3.9	-1.8	-1.3	1.3	4.4	7.7	11.1	12.9	12.5	10.4	6.2	2	-0.9	0.8	2	5.6	9.2	12.7	16.1	18.1	17.7	15.3	10.4	5.1	1.5	83	71	72	56
Qpe	T-FR-009	4003040	8	253.767	24	77	47.761	5.487	330	3.4	5.3	10	14.1	17.8	21.1	23.4	22.9	20.1	14.5	8.2	3.9	-1.8	-1.3	1.3	4.4	7.7	11.1	12.9	12.5	10.4	6.2	2	-0.9	0.8	2	5.6	9.2	12.7	16.1	18.1	17.7	15.3	10.4	5.1	1.5	83	71	72	56
Qpe	T-FR-009	4003048	8	281.825	24	77	47.761	5.487	330	3.4	5.3	10	14.1	17.8	21.1	23.4	22.9	20.1	14.5	8.2	3.9	-1.8	-1.3	1.3	4.4	7.7	11.1	12.9	12.5	10.4	6.2	2	-0.9	0.8	2	5.6	9.2	12.7	16.1	18.1	17.7	15.3	10.4	5.1	1.5	83	71	72	56
Qpe	T-FR-009	4003050	8	293.276	21	77	47.761	5.487	330	3.4	5.3	10	14.1	17.8	21.1	23.4	22.9	20.1	14.5	8.2	3.9	-1.8	-1.3	1.3	4.4	7.7	11.1	12.9	12.5	10.4	6.2	2	-0.9	0.8	2	5.6	9.2	12.7	16.1	18.1	17.7	15.3	10.4	5.1	1.5	83	71	72	56
Qpe	T-FR-009	4004062	8	277.571	21	77	47.761	5.487	330	3.4	5.3	10	14.1	17.8	21.1	23.4	22.9	20.1	14.5	8.2	3.9	-1.8	-1.3	1.3	4.4	7.7	11.1	12.9	12.5	10.4	6.2	2	-0.9	0.8	2	5.6	9.2	12.7	16.1	18.1	17.7	15.3	10.4	5.1	1.5	83	71	72	56
Qpe	T-FR-009	4005071	8	316.276	21	77	47.761	5.487	330	3.4	5.3	10	14.1	17.8	21.1	23.4	22.9	20.1	14.5	8.2	3.9	-1.8	-1.3	1.3	4.4	7.7	11.1	12.9	12.5	10.4	6.2	2	-0.9	0.8	2	5.6	9.2	12.7	16.1	18.1	17.7	15.3	10.4	5.1	1.5	83	71	72	56
Qpe	T-FR-009	4005076	8	292.622	18	77	47.761	5.487	330	3.4	5.3	10	14.1	17.8	21.1	23.4	22.9	20.1	14.5	8.2	3.9	-1.8	-1.3	1.3	4.4	7.7	11.1	12.9	12.5	10.4	6.2	2	-0.9	0.8	2	5.6	9.2	12.7	16.1	18.1	17.7	15.3	10.4	5.1	1.5	83	71	72	56
Qpe	T-FR-010	2001002	8	179.196	22	21	46.4607	2.89067	270	6.1	7.8	12	15.1	18.5	22.2	24.7	24.1	21.7	16.3	10.3	6.4	-1	-0.3	1.4	4.2	7.3	10.6	12.3	12	10.2	6.1	2.8	-0.2	2.6	3.7	6.7	9.6	12.9	16.4	18.5	18.1	15.9	11.2	6.6	3.1	58	58	56	55
Qpe	T-FR-010	2002010	8	156.858	19	21	46.4607	2.89067	270	6.1	7.8	12	15.1	18.5	22.2	24.7	24.1	21.7	16.3	10.3	6.4	-1	-0.3	1.4	4.2	7.3	10.6	12.3	12	10.2	6.1	2.8	-0.2	2.6	3.7	6.7	9.6	12.9	16.4	18.5	18.1	15.9	11.2	6.6	3.1	58	58	56	55
Qpe	T-FR-010	2003017	8	144.325	19	21	46.4607	2.89067	270	6.1	7.8	12	15.1	18.5	22.2	24.7	24.1	21.7	16.3	10.3	6.4	-1	-0.3	1.4	4.2	7.3	10.6	12.3	12	10.2	6.1	2.8	-0.2	2.6	3.7	6.7	9.6	12.9	16.4	18.5	18.1	15.9	11.2	6.6	3.1	58	58	56	55
Qpe	T-FR-010	2004020	8	131.695	22	21	46.4607	2.89067	270	6.1	7.8	12	15.1	18.5	22.2	24.7	24.1	21.7	16.3	10.3	6.4	-1	-0.3	1.4	4.2	7.3	10.6	12.3	12	10.2	6.1	2.8	-0.2	2.6	3.7	6.7	9.6	12.9	16.4	18.5	18.1	15.9	11.2	6.6	3.1	58	58	56	55
Qpe	T-FR-010	2005025	8	127.892	17	21	46.4607	2.89067	270	6.1	7.8	12	15.1	18.5	22.2	24.7	24.1	21.7	16.3	10.3	6.4	-1	-0.3	1.4	4.2	7.3	10.6	12.3	12	10.2	6.1	2.8	-0.2	2.6	3.7	6.7	9.6	12.9	16.4	18.5	18.1	15.9	11.2	6.6	3.1	58	58	56	55
Qpe	T-FR-010	2006034	8	196.511	19	21	46.4607	2.89067	270	6.1	7.8	12	15.1	18.5	22.2	24.7	24.1	21.7	16.3	10.3	6.4	-1	-0.3	1.4	4.2	7.3	10.6	12.3	12	10.2	6.1	2.8	-0.2	2.6	3.7	6.7	9.6	12.9	16.4	18.5	18.1	15.9	11.2	6.6	3.1	58	58	56	55
Qpe	T-FR-010	2007039	8	108.408	16	21	46.4607	2.89067	270	6.1	7.8	12	15.1	18.5	22.2	24.7	24.1	21.7	16.3	10.3	6.4	-1	-0.3	1.4	4.2	7.3	10.6	12.3	12	10.2	6.1	2.8	-0.2	2.6	3.7	6.7	9.6	12.9	16.4	18.5	18.1	15.9	11.2	6.6	3.1	58	58	56	55
Qpe	T-FR-010	2008047	8	184.681	17	21	46.4607	2.89067	270	6.1	7.8	12	15.1	18.5	22.2	24.7	24.1	21.7	16.3	10.3	6.4	-1	-0.3	1.4	4.2	7.3	10.6	12.3	12	10.2	6.1	2.8	-0.2	2.6	3.7	6.7	9.6	12.9	16.4	18.5	18.1	15.9	11.2	6.6	3.1	58	58	56	55
Qpe	T-FR-010	2009050	8	154.621	22	21	46.4607	2.89067	270	6.1	7.8	12	15.1	18.5	22.2	24.7	24.1	21.7	16.3	10.3	6.4	-1	-0.3	1.4	4.2	7.3	10.6	12.3	12	10.2	6.1	2.8	-0.2	2.6	3.7	6.7	9.6	12.9	16.4	18.5	18.1	15.9	11.2	6.6	3.1	58	58	56	55
Qpe	T-FR-010	2010059	8	165.211	17	21	46.4607	2.89067	270	6.1	7.8	12	15.1	18.5	22.2	24.7	24.1	21.7	16.3	10.3	6.4	-1	-0.3	1.4	4.2	7.3	10.6	12.3	12	10.2	6.1	2.8	-0.2	2.6	3.7	6.7	9.6	12.9	16.4	18.5	18.1	15.9	11.2	6.6	3.1	58	58	56	55
Qpe	T-FR-010	4001003	8	107.181	15	21	46.4607	2.89067	270	6.1	7.8	12	15.1	18.5	22.2	24.7	24.1	21.7	16.3	10.3	6.4	-1	-0.3	1.4	4.2	7.3	10.6	12.3	12	10.2	6.1	2.8	-0.2	2.6	3.7	6.7	9.6	12.9	16.4	18.5	18.1	15.9	11.2	6.6	3.1	58	58	56	55
Qpe	T-FR-010	4001006	8	102	16	21	46.4607	2.89067	270	6.1	7.8	12	15.1	18.5	22.2	24.7	24.1	21.7	16.3	10.3	6.4	-1	-0.3	1.4	4.2	7.3	10.6	12.3	12	10.2	6.1	2.8	-0.2	2.6	3.7	6.7	9.6	12.9	16.4	18.5	18.1	15.9	11.2	6.6	3.1	58	58	56	55
Qpe	T-FR-010	4001014	8	103.58	16	21	46.4607	2.89067	270	6.1	7.8	12	15.1	18.5	22.2	24.7	24.1	21.7	16.3	10.3	6.4	-1	-0.3	1.4	4.2	7.3	10.6	12.3	12	10.2	6.1	2.8	-0.2	2.6	3.7	6.7	9.6	12.9	16.4	18.5	18.1	15.9	11.2	6.6	3.1	58	58	56	55
Qpe	T-FR-010	4002026	8	161.49	21	21	46.4607	2.89067	270	6.1	7.8	12	15.1	18.5	22.2	24.7	24.1	21.7	16.3	10.3	6.4	-1	-0.3	1.4	4.2	7.3	10.6	12.3	12	10.2	6.1	2.8	-0.2	2.6	3.7	6.7	9.6	12.9	16.4	18.5	18.1	15.9	11.2	6.6	3.1	58	58	56	55
Qpe	T-FR-010	4002031	8	84.3968	9	21	46.4607	2.89067	270	6.1	7.8	12	15.1	18.5	22.2	24.7	24.1	21.7	16.3	10.3	6.4	-1	-0.3	1.4	4.2	7.3	10.6	12.3	12	10.2	6.1	2.8	-0.2	2.6	3.7	6.7	9.6	12.9	16.4	18.5	18.1	15.9	11.2	6.6	3.1	58	58	56	55
Qpe	T-FR-010	4002034	8	131.52	14	21	46.4607	2.89067	270	6.1	7.8	12	15.1	18.5	22.2	24.7	24.1	21.7	16.3	10.3	6.4	-1	-0.3	1.4	4.2	7.3	10.6	12.3	12	10.2	6.1	2.8	-0.2	2.6	3.7	6.7	9.6	12.9	16.4	18.5	18.1	15.9	11.2	6.6	3.1	58	58	56	55
Qpe	T-FR-010	4003037	8	144.723	16	21	46.4607	2.89067	270	6.1	7.8	12	15.1	18.5	22.2	24.7	24.1	21.7	16.3	10.3	6.4	-1	-0.3	1.4	4.2	7.3	10.6	12.3	12	10.2	6.1	2.8	-0.2	2.6	3.7	6.7	9.6	12.9	16.4	18.5	18.1	15.9	11.2	6.6	3.1	58	58	56	55
Qpe	T-FR-010	4003039	8	308.106	23	21	46.4607	2.89067	270	6.1	7.8	12	15.1	18.5	22.2	24.7	24.1	21.7	16.3	10.3	6.4	-1	-0.3	1.4	4.2	7.3	10.6	12.3	12	10.2	6.1	2.8	-0.2	2.6	3.7	6.7	9.6	12.9	16.4	18.5	18.1	15.9	11.2	6.6	3.1	58	58	56	55
Qpe	T-FR-010	4003049	8	111.02	7	21	46.4607	2.89067	270	6.1	7.8	12	15.1	18.5	22.2	24.7	24.1	21.7	16.3	10.3	6.4	-1	-0.3	1.4	4.2	7.3	10.6	12.3	12	10.2	6.1	2.8	-0.2	2.6	3.7	6.7	9.6	12.9	16.4	18.5	18.1	15.9	11.2	6.6	3.1	58	58	56	55
Qpe	T-FR-010	4004052	8	309	22	21	46.4607	2.89067	270	6.1	7.8	12	15.1	18.5	22.2	24.7	24.1	21.7	16.3	10.3	6.4	-1	-0.3	1.4	4.2	7.3	10.6	12.3	12	10.2	6.1	2.8	-0.2	2.6	3.7	6.7	9.6	12.9	16.4	18.5	18.1	15.9	11.2	6.6	3.1	58	58	56	55
Qpe	T-FR-010	4004056	8	417.137	23	21	46.4607	2.89067	270	6.1	7.8	12	15.1	18.5	22.2	24.7	24.1	21.7	16.3	10.3	6.4	-1	-0.3	1.4	4.2	7.3	10.6	12.3	12	10.2	6.1	2.8	-0.2	2.6	3.7	6.7	9.6	12.9	16.4	18.5	18.1	15.9	11.2	6.6	3.1	58	58	56	55
Qpe	T-FR-010	4004058	8	376.256	19	21	46.4607	2.89067	270	6.1	7.8	12	15.1	18.5	22.2	24.7	24.1	21.7	16.3	10.3	6.4	-1	-0.3	1.4	4.2	7.3	10.6	12.3	12	10.2	6.1	2.8	-0.2	2.6	3.7	6.7	9.6	12.9	16.4	18.5	18.1	15.9	11.2	6.6	3.1	58	58	56	55
Qpe	T-FR-010	4005069	8	168.248	15	21	46.4607	2.89067	270	6.1	7.8	12	15.1	18.5	22.2	24.7	24.1	21.7	16.3	10.3	6.4	-1	-0.3	1.4	4.2	7.3	10.6	12.3	12	10.2	6.1	2.8	-0.2	2.6	3.7	6.7	9.6	12.9	16.4	18.5	18.1	15.9	11.2	6.6	3.1	58	58	56	55
Qpe	T-FR-010	4005070	8	117.457	20	21	46.4607	2.89067	270	6.1	7.8	12	15.1	18.5	22.2	24.7	24.1	21.7	16.3	10.3	6.4	-1	-0.3	1.4	4.2	7.3	10.6	12.3	12	10.2	6.1	2.8	-0.2	2.6	3.7	6.7	9.6	12.9	16.4	18.5	18.1	15.9	11.2	6.6	3.1	58	58	56	55
Qpe	T-FR-010	4005077	8	135.462	13	21	46.4607	2.89067	270	6.1	7.8	12	15.1	18.5	22.2	24.7	24.1	21.7	16.3	10.3	6.4	-1	-0.3	1.4	4.2	7.3	10.6	12.3	12	10.2	6.1	2.8	-0.2	2.6	3.7	6.7	9.6	12.9	16.4	18.5	18.1	15.9	11.2	6.6	3.1	58	58	56	55
Qpe	T-FR-010	2001002	8	116.789	21	26	51.948	-2.45	70	6.5	6.8	9.1	12.2	15.5	18.9	20.3	19.9	17.6	14.2	9.5	7.4	1.2	1.1	2.2	4.5	7.2	10.3	11.8	11.6	9.6	7.3	3.6	2.1	3.9	4	5.6	8.3	11.3	14.6	16.1	15.7	13.6	10.7	6.5	4.8	69	48	55	49
Qpe	T-FR-010	2002007	8	162.712	21	26	51.948	-2.45	70	6.5	6.8	9.1	12.2	15.5	18.9	20.3	19.9	17.6	14.2	9.5	7.4	1.2	1.1	2.2	4.5	7.2	10.3	11.8	11.6	9.6	7.3	3.6	2.1	3.9	4	5.6	8.3	11.3	14.6	16.1	15.7	13.6	10.7	6.5	4.8	69	48	55	49
Qpe	T-FR-010	2003016	8	74.0849	19	26	51.948	-2.45	70	6.5	6.8	9.1	12.2	15.5	18.9	20.3	19.9	17.6	14.2	9.5	7.4	1.2	1.1	2.2	4.5	7.2	10.3	11.8	11.6	9.6	7.3	3.6	2.1	3.9	4	5.6	8.3	11.3	14.6	16.1	15.7	13.6	10.7	6.5	4.8	69	48	55	49
Qpe	T-FR-010	2004024	8	166.436	23	26	51.948	-2.45	70	6.5	6.8	9.1	12.2	15.5	18.9	20.3	19.9	17.6	14.2	9.5	7.4	1.2	1.1	2.2	4.5	7.2	10.3	11.8	11.6	9.6	7.3	3.6	2.1	3.9	4	5.6	8.3	11.3	14.6	16.1	15.7	13.6	10.7	6.5	4.8	69	48	55	49
Qpe	T-FR-010	2005025	8	166.765	18	26	51.948	-2.45	70	6.5	6.8	9.1	12.2	15.5	18.9	20.3	19.9	17.6	14.2	9.5	7.4	1.2	1.1	2.2	4.5	7.2	10.3	11.8	11.6	9.6	7.3	3.6	2.1	3.9	4	5.6	8.3	11.3	14.6	16.1	15.7	13.6	10.7	6.5	4.8	69	48	55	49
Qpe	T-FR-010	2006033	8	211.027	21	26	51.948	-2.45	70	6.5	6.8	9.1	12.2	15.5	18.9	20.3	19.9	17.6	14.2	9.5	7.4	1.2	1.1	2.2	4.5	7.2	10.3	11.8	11.6	9.6	7.3	3.6	2.1	3.9	4	5.6	8.3	11.3	14.6	16.1	15.7	13.6	10.7	6.5	4.8	69	48	55	49
Qpe	T-FR-010	2007040	8	113.478	12	26	51.948	-2.45	70	6.5	6.8	9.1	12.2	15.5	18.9	20.3	19.9	17.6	14.2	9.5	7.4	1.2	1.1	2.2	4.5	7.2	10.3	11.8	11.6	9.6	7.3	3.6	2.1	3.9	4	5.6	8.3	11.3	14.6	16.1	15.7	13.6	10.7	6.5	4.8	69	48	55	49
Qpe	T-FR-010	2008043	8	102.691	21	26	51.948	-2.45	70	6.5	6.8	9.1	12.2	15.5	18.9	20.3	19.9	17.6	14.2	9.5	7.4	1.2	1.1	2.2	4.5	7.2	10.3	11.8	11.6	9.6	7.3	3.6	2.1	3.9	4	5.6	8.3	11.3	14.6	16.1	15.7	13.6	10.7	6.5	4.8	69	48	55	49
Qpe	T-FR-010	2009052	8	150.594	22	26	51.948	-2.45	70	6.5	6.8	9.1	12.2	15.5	18.9	20.3	19.9	17.6	14.2	9.5	7.4	1.2	1.1	2.2	4.5	7.2	10.3	11.8	11.6	9.6	7.3	3.6	2.1	3.9	4	5.6	8.3	11.3	14.6	16.1	15.7	13.6	10.7	6.5	4.8	69	48	55	49
Qpe	T-FR-010	2010059	8	216.872	21	26	51.948	-2.45	70	6.5	6.8	9.1	12.2	15.5	18.9	20.3	19.9	17.6	14.2	9.5	7.4	1.2	1.1	2.2	4.5	7.2	10.3	11.8	11.6	9.6	7.3	3.6	2.1	3.9	4	5.6	8.3	11.3	14.6	16.1	15.7	13.6	10.7	6.5	4.8	69	48	55	49
Qpe	T-FR-010	4001001	8	117.706	18	260	56.071	9.597	25	2.7	3.3	5.4	9.2	14.7	18	19.3	19.1	15.9	11.6	7.3	4.3	-5.4	-5.4	-2	2.8	7.6	11	12.9	11.7	9.3	5.6	1.1	0.2	-1.3	-1	1.7	6	11.1	14.5	16.1	15.4	12.6	8.6	4.2	2.2	59	41	47	43
Qpe	T-FR-010	4001003	8	103.516	13	260	56.071	9.597	25	2.7	3.3	5.4	9.2	14.7	18	19.3	19.1	15.9	11.6	7.3	4.3	-5.4	-5.4	-2	2.8	7.6	11	12.9	11.7	9.3	5.6	1.1	0.2	-1.3	-1	1.7	6	11.1	14.5	16.1	15.4	12.6	8.6	4.2	2.2	59	41	47	43
Qpe	T-FR-010	4002027	8	136.302	18	260	56.071	9.597	25	2.7	3.3	5.4	9.2	14.7	18	19.3	19.1	15.9	11.6	7.3	4.3	-5.4	-5.4	-2	2.8	7.6	11	12.9	11.7	9.3	5.6	1.1	0.2	-1.3	-1	1.7	6	11.1	14.5	16.1	15.4	12.6	8.6	4.2	2.2	59	41	47	43
Qpe	T-FR-010	4002028	8	143.905	12	260	56.071	9.597	25	2.7	3.3	5.4	9.2	14.7	18	19.3	19.1	15.9	11.6	7.3	4.3	-5.4	-5.4	-2	2.8	7.6	11	12.9	11.7	9.3	5.6	1.1	0.2	-1.3	-1	1.7	6	11.1	14.5	16.1	15.4	12.6	8.6	4.2	2.2	59	41	47	43
Qpe	T-FR-010	4003045	8	313.351	22	260	56.071	9.597	25	2.7	3.3	5.4	9.2	14.7	18	19.3	19.1	15.9	11.6	7.3	4.3	-5.4	-5.4	-2	2.8	7.6	11	12.9	11.7	9.3	5.6	1.1	0.2	-1.3	-1	1.7	6	11.1	14.5	16.1	15.4	12.6	8.6	4.2	2.2	59	41	47	43
Qpe	T-FR-010	4003047	8	115.704	14	260	56.071	9.597	25	2.7	3.3	5.4	9.2	14.7	18	19.3	19.1	15.9	11.6	7.3	4.3	-5.4	-5.4	-2	2.8	7.6	11	12.9	11.7	9.3	5.6	1.1	0.2	-1.3	-1	1.7	6	11.1	14.5	16.1	15.4	12.6	8.6	4.2	2.2	59	41	47	43
Qpe	T-FR-010	4004053	8	304.468	22	260	56.071	9.597	25	2.7	3.3	5.4	9.2	14.7	18	19.3	19.1	15.9	11.6	7.3	4.3	-5.4	-5.4	-2	2.8	7.6	11	12.9	11.7	9.3	5.6	1.1	0.2	-1.3	-1	1.7	6	11.1	14.5	16.1	15.4	12.6	8.6	4.2	2.2	59	41	47	43
Qpe	T-FR-010	4004067	8	239.884	21	260	56.071	9.597	25	2.7	3.3	5.4	9.2	14.7	18	19.3	19.1	15.9	11.6	7.3	4.3	-5.4	-5.4	-2	2.8	7.6	11	12.9	11.7	9.3	5.6	1.1	0.2	-1.3	-1	1.7	6	11.1	14.5	16.1	15.4	12.6	8.6	4.2	2.2	59	41	47	43
Qpe	T-FR-010	4005078	8	109.898	14	260	56.071	9.597	25	2.7	3.3	5.4	9.2	14.7	18	19.3	19.1	15.9	11.6	7.3	4.3	-5.4	-5.4	-2	2.8	7.6	11	12.9	11.7	9.3	5.6	1.1	0.2	-1.3	-1	1.7	6	11.1	14.5	16.1	15.4	12.6	8.6	4.2	2.2	59	41	47	43
Qpe	T-FR-010	4005084	8	111.286	11	260	56.071	9.597	25	2.7	3.3	5.4	9.2	14.7	18	19.3	19.1	15.9	11.6	7.3	4.3	-5.4	-5.4	-2	2.8	7.6	11	12.9	11.7	9.3	5.6	1.1	0.2	-1.3	-1	1.7	6	11.1	14.5	16.1	15.4	12.6	8.6	4.2	2.2	59	41	47	43
Qpe	T-FR-010	4001001	8	162.306	14	263	53.707	9.762	10	2	3.1	6.7	11.8	17	20.3	21.5	21.4	18.6	13	7.3	3.7	-2.6	-2.5	-0.3	2.7	6.6	9.9	11.9	11.5	9	5.8	2.3	-0.8	-0.3	0.3	3.2	7.3	11.8	15.1	16.7	16.4	13.8	9.4	4.8	1.5	62	44	52	47
Qpe	T-FR-010	4001004	8	145.126	17	263	53.707	9.762	10	2	3.1	6.7	11.8	17	20.3	21.5	21.4	18.6	13	7.3	3.7	-2.6	-2.5	-0.3	2.7	6.6	9.9	11.9	11.5	9	5.8	2.3	-0.8	-0.3	0.3	3.2	7.3	11.8	15.1	16.7	16.4	13.8	9.4	4.8	1.5	62	44	52	47
Qpe	T-FR-010	4002022	8	128.157	10	263	53.707	9.762	10	2	3.1	6.7	11.8	17	20.3	21.5	21.4	18.6	13	7.3	3.7	-2.6	-2.5	-0.3	2.7	6.6	9.9	11.9	11.5	9	5.8	2.3	-0.8	-0.3	0.3	3.2	7.3	11.8	15.1	16.7	16.4	13.8	9.4	4.8	1.5	62	44	52	47
Qpe	T-FR-010	4002025	8	158.229	15	263	53.707	9.762	10	2	3.1	6.7	11.8	17	20.3	21.5	21.4	18.6	13	7.3	3.7	-2.6	-2.5	-0.3	2.7	6.6	9.9	11.9	11.5	9	5.8	2.3	-0.8	-0.3	0.3	3.2	7.3	11.8	15.1	16.7	16.4	13.8	9.4	4.8	1.5	62	44	52	47
Qpe	T-FR-010	4003036	8	118.962	19	263	53.707	9.762	10	2	3.1	6.7	11.8	17	20.3	21.5	21.4	18.6	13	7.3	3.7	-2.6	-2.5	-0.3	2.7	6.6	9.9	11.9	11.5	9	5.8	2.3	-0.8	-0.3	0.3	3.2	7.3	11.8	15.1	16.7	16.4	13.8	9.4	4.8	1.5	62	44	52	47
Qpe	T-FR-010	4003048	8	141.595	18	263	53.707	9.762	10	2	3.1	6.7	11.8	17	20.3	21.5	21.4	18.6	13	7.3	3.7	-2.6	-2.5	-0.3	2.7	6.6	9.9	11.9	11.5	9	5.8	2.3	-0.8	-0.3	0.3	3.2	7.3	11.8	15.1	16.7	16.4	13.8	9.4	4.8	1.5	62	44	52	47
Qpe	T-FR-010	4004053	8	316.827	19	263	53.707	9.762	10	2	3.1	6.7	11.8	17	20.3	21.5	21.4	18.6	13	7.3	3.7	-2.6	-2.5	-0.3	2.7	6.6	9.9	11.9	11.5	9	5.8	2.3	-0.8	-0.3	0.3	3.2	7.3	11.8	15.1	16.7	16.4	13.8	9.4	4.8	1.5	62	44	52	47
Qpe	T-FR-010	4004061	8	224.507	20	263	53.707	9.762	10	2	3.1	6.7	11.8	17	20.3	21.5	21.4	18.6	13	7.3	3.7	-2.6	-2.5	-0.3	2.7	6.6	9.9	11.9	11.5	9	5.8	2.3	-0.8	-0.3	0.3	3.2	7.3	11.8	15.1	16.7	16.4	13.8	9.4	4.8	1.5	62	44	52	47
Qpe	T-FR-010	4005076	8	175.937	18	263	53.707	9.762	10	2	3.1	6.7	11.8	17	20.3	21.5	21.4	18.6	13	7.3	3.7	-2.6	-2.5	-0.3	2.7	6.6	9.9	11.9	11.5	9	5.8	2.3	-0.8	-0.3	0.3	3.2	7.3	11.8	15.1	16.7	16.4	13.8	9.4	4.8	1.5	62	44	52	47
Qpe	T-FR-010	4005082	8	286.151	18	263	53.707	9.762	10	2	3.1	6.7	11.8	17	20.3	21.5	21.4	18.6	13	7.3	3.7	-2.6	-2.5	-0.3	2.7	6.6	9.9	11.9	11.5	9	5.8	2.3	-0.8	-0.3	0.3	3.2	7.3	11.8	15.1	16.7	16.4	13.8	9.4	4.8	1.5	62	44	52	47
Qpe	T-FR-010	4001005	8	102.774	12	277	40.917	31.667	1200	2.1	3.8	8.1	12.7	17.1	20.7	22.8	23	20.4	14.9	10.3	4.2	-4.5	-3.4	-1.1	2.7	6.5	9.2	11.4	11.1	8.7	5	1.6	-2	-1.2	0.2	3.5	7.7	11.8	14.9	17.1	17	14.6	10	6	1.1	87	69	68	67
Qpe	T-FR-010	4001010	8	138.345	12	277	40.917	31.667	1200	2.1	3.8	8.1	12.7	17.1	20.7	22.8	23	20.4	14.9	10.3	4.2	-4.5	-3.4	-1.1	2.7	6.5	9.2	11.4	11.1	8.7	5	1.6	-2	-1.2	0.2	3.5	7.7	11.8	14.9	17.1	17	14.6	10	6	1.1	87	69	68	67
Qpe	T-FR-010	4002024	8	129.796	7	277	40.917	31.667	1200	2.1	3.8	8.1	12.7	17.1	20.7	22.8	23	20.4	14.9	10.3	4.2	-4.5	-3.4	-1.1	2.7	6.5	9.2	11.4	11.1	8.7	5	1.6	-2	-1.2	0.2	3.5	7.7	11.8	14.9	17.1	17	14.6	10	6	1.1	87	69	68	67
Qpe	T-FR-010	4002026	8	109.413	9	277	40.917	31.667	1200	2.1	3.8	8.1	12.7	17.1	20.7	22.8	23	20.4	14.9	10.3	4.2	-4.5	-3.4	-1.1	2.7	6.5	9.2	11.4	11.1	8.7	5	1.6	-2	-1.2	0.2	3.5	7.7	11.8	14.9	17.1	17	14.6	10	6	1.1	87	69	68	67
Qpe	T-FR-010	4003039	8	273.252	21	277	40.917	31.667	1200	2.1	3.8	8.1	12.7	17.1	20.7	22.8	23	20.4	14.9	10.3	4.2	-4.5	-3.4	-1.1	2.7	6.5	9.2	11.4	11.1	8.7	5	1.6	-2	-1.2	0.2	3.5	7.7	11.8	14.9	17.1	17	14.6	10	6	1.1	87	69	68	67
Qpe	T-FR-010	4003046	8	320.962	15	277	40.917	31.667	1200	2.1	3.8	8.1	12.7	17.1	20.7	22.8	23	20.4	14.9	10.3	4.2	-4.5	-3.4	-1.1	2.7	6.5	9.2	11.4	11.1	8.7	5	1.6	-2	-1.2	0.2	3.5	7.7	11.8	14.9	17.1	17	14.6	10	6	1.1	87	69	68	67
Qpe	T-FR-010	4004058	8	304.823	21	277	40.917	31.667	1200	2.1	3.8	8.1	12.7	17.1	20.7	22.8	23	20.4	14.9	10.3	4.2	-4.5	-3.4	-1.1	2.7	6.5	9.2	11.4	11.1	8.7	5	1.6	-2	-1.2	0.2	3.5	7.7	11.8	14.9	17.1	17	14.6	10	6	1.1	87	69	68	67
Qpe	T-FR-010	4004067	8	208.914	15	277	40.917	31.667	1200	2.1	3.8	8.1	12.7	17.1	20.7	22.8	23	20.4	14.9	10.3	4.2	-4.5	-3.4	-1.1	2.7	6.5	9.2	11.4	11.1	8.7	5	1.6	-2	-1.2	0.2	3.5	7.7	11.8	14.9	17.1	17	14.6	10	6	1.1	87	69	68	67
Qpe	T-FR-010	4005069	8	211.008	18	277	40.917	31.667	1200	2.1	3.8	8.1	12.7	17.1	20.7	22.8	23	20.4	14.9	10.3	4.2	-4.5	-3.4	-1.1	2.7	6.5	9.2	11.4	11.1	8.7	5	1.6	-2	-1.2	0.2	3.5	7.7	11.8	14.9	17.1	17	14.6	10	6	1.1	87	69	68	67
Qpe	T-FR-010	4005071	8	129.738	18	277	40.917	31.667	1200	2.1	3.8	8.1	12.7	17.1	20.7	22.8	23	20.4	14.9	10.3	4.2	-4.5	-3.4	-1.1	2.7	6.5	9.2	11.4	11.1	8.7	5	1.6	-2	-1.2	0.2	3.5	7.7	11.8	14.9	17.1	17	14.6	10	6	1.1	87	69	68	67
Qpe	T-FR-010	4001005	8	110.363	13	31	52.8327	10.317	110	2	3.1	7.1	12.2	17.7	21	22.3	22	18.5	13	7	3.3	-3.1	-3	-0.8	2.4	6.3	9.6	11.7	11.2	8.5	5.2	1.8	-1.6	-0.6	0	3.1	7.3	12	15.3	17	16.6	13.5	9.1	4.4	0.8	53	42	47	50
Qpe	T-FR-010	4001008	8	134.73	18	31	52.8327	10.317	110	2	3.1	7.1	12.2	17.7	21	22.3	22	18.5	13	7	3.3	-3.1	-3	-0.8	2.4	6.3	9.6	11.7	11.2	8.5	5.2	1.8	-1.6	-0.6	0	3.1	7.3	12	15.3	17	16.6	13.5	9.1	4.4	0.8	53	42	47	50
Qpe	T-FR-010	4002023	8	140.865	19	31	52.8327	10.317	110	2	3.1	7.1	12.2	17.7	21	22.3	22	18.5	13	7	3.3	-3.1	-3	-0.8	2.4	6.3	9.6	11.7	11.2	8.5	5.2	1.8	-1.6	-0.6	0	3.1	7.3	12	15.3	17	16.6	13.5	9.1	4.4	0.8	53	42	47	50
Qpe	T-FR-010	4002029	8	168.774	12	31	52.8327	10.317	110	2	3.1	7.1	12.2	17.7	21	22.3	22	18.5	13	7	3.3	-3.1	-3	-0.8	2.4	6.3	9.6	11.7	11.2	8.5	5.2	1.8	-1.6	-0.6	0	3.1	7.3	12	15.3	17	16.6	13.5	9.1	4.4	0.8	53	42	47	50
Qpe	T-FR-010	4003045	8	366.175	22	31	52.8327	10.317	110	2	3.1	7.1	12.2	17.7	21	22.3	22	18.5	13	7	3.3	-3.1	-3	-0.8	2.4	6.3	9.6	11.7	11.2	8.5	5.2	1.8	-1.6	-0.6	0	3.1	7.3	12	15.3	17	16.6	13.5	9.1	4.4	0.8	53	42	47	50
Qpe	T-FR-010	4003048	8	149.211	19	31	52.8327	10.317	110	2	3.1	7.1	12.2	17.7	21	22.3	22	18.5	13	7	3.3	-3.1	-3	-0.8	2.4	6.3	9.6	11.7	11.2	8.5	5.2	1.8	-1.6	-0.6	0	3.1	7.3	12	15.3	17	16.6	13.5	9.1	4.4	0.8	53	42	47	50
Qpe	T-FR-010	4004060	8	201.006	23	31	52.8327	10.317	110	2	3.1	7.1	12.2	17.7	21	22.3	22	18.5	13	7	3.3	-3.1	-3	-0.8	2.4	6.3	9.6	11.7	11.2	8.5	5.2	1.8	-1.6	-0.6	0	3.1	7.3	12	15.3	17	16.6	13.5	9.1	4.4	0.8	53	42	47	50
Qpe	T-FR-010	4004064	8	232.578	22	31	52.8327	10.317	110	2	3.1	7.1	12.2	17.7	21	22.3	22	18.5	13	7	3.3	-3.1	-3	-0.8	2.4	6.3	9.6	11.7	11.2	8.5	5.2	1.8	-1.6	-0.6	0	3.1	7.3	12	15.3	17	16.6	13.5	9.1	4.4	0.8	53	42	47	50
Qpe	T-FR-010	4005079	8	175.893	12	31	52.8327	10.317	110	2	3.1	7.1	12.2	17.7	21	22.3	22	18.5	13	7	3.3	-3.1	-3	-0.8	2.4	6.3	9.6	11.7	11.2	8.5	5.2	1.8	-1.6	-0.6	0	3.1	7.3	12	15.3	17	16.6	13.5	9.1	4.4	0.8	53	42	47	50
Qpe	T-FR-010	4005084	8	181.55	20	31	52.8327	10.317	110	2	3.1	7.1	12.2	17.7	21	22.3	22	18.5	13	7	3.3	-3.1	-3	-0.8	2.4	6.3	9.6	11.7	11.2	8.5	5.2	1.8	-1.6	-0.6	0	3.1	7.3	12	15.3	17	16.6	13.5	9.1	4.4	0.8	53	42	47	50
Qpe	T-FR-010	4001007	8	122.253	13	33	51.1827	17.9313	210	-0.2	1.5	6.7	13	18.2	21.7	22.8	22.6	18.6	13.6	6.9	2.1	-5.7	-4.5	-0.9	3	7.4	10.9	12	11.6	8.8	4.7	1	-3.1	-3	-1.5	2.9	8	12.8	16.3	17.4	17.1	13.7	9.1	4	-0.5	31	28	29	37
Qpe	T-FR-010	4001008	8	166.442	22	33	51.1827	17.9313	210	-0.2	1.5	6.7	13	18.2	21.7	22.8	22.6	18.6	13.6	6.9	2.1	-5.7	-4.5	-0.9	3	7.4	10.9	12	11.6	8.8	4.7	1	-3.1	-3	-1.5	2.9	8	12.8	16.3	17.4	17.1	13.7	9.1	4	-0.5	31	28	29	37
Qpe	T-FR-010	4002023	8	164.437	17	33	51.1827	17.9313	210	-0.2	1.5	6.7	13	18.2	21.7	22.8	22.6	18.6	13.6	6.9	2.1	-5.7	-4.5	-0.9	3	7.4	10.9	12	11.6	8.8	4.7	1	-3.1	-3	-1.5	2.9	8	12.8	16.3	17.4	17.1	13.7	9.1	4	-0.5	31	28	29	37
Qpe	T-FR-010	4002028	8	155.867	14	33	51.1827	17.9313	210	-0.2	1.5	6.7	13	18.2	21.7	22.8	22.6	18.6	13.6	6.9	2.1	-5.7	-4.5	-0.9	3	7.4	10.9	12	11.6	8.8	4.7	1	-3.1	-3	-1.5	2.9	8	12.8	16.3	17.4	17.1	13.7	9.1	4	-0.5	31	28	29	37
Qpe	T-FR-010	4003039	8	316.706	18	33	51.1827	17.9313	210	-0.2	1.5	6.7	13	18.2	21.7	22.8	22.6	18.6	13.6	6.9	2.1	-5.7	-4.5	-0.9	3	7.4	10.9	12	11.6	8.8	4.7	1	-3.1	-3	-1.5	2.9	8	12.8	16.3	17.4	17.1	13.7	9.1	4	-0.5	31	28	29	37
Qpe	T-FR-010	4003040	8	139.492	18	33	51.1827	17.9313	210	-0.2	1.5	6.7	13	18.2	21.7	22.8	22.6	18.6	13.6	6.9	2.1	-5.7	-4.5	-0.9	3	7.4	10.9	12	11.6	8.8	4.7	1	-3.1	-3	-1.5	2.9	8	12.8	16.3	17.4	17.1	13.7	9.1	4	-0.5	31	28	29	37
Qpe	T-FR-010	4004059	8	283.881	18	33	51.1827	17.9313	210	-0.2	1.5	6.7	13	18.2	21.7	22.8	22.6	18.6	13.6	6.9	2.1	-5.7	-4.5	-0.9	3	7.4	10.9	12	11.6	8.8	4.7	1	-3.1	-3	-1.5	2.9	8	12.8	16.3	17.4	17.1	13.7	9.1	4	-0.5	31	28	29	37
Qpe	T-FR-010	4004067	8	255.42	17	33	51.1827	17.9313	210	-0.2	1.5	6.7	13	18.2	21.7	22.8	22.6	18.6	13.6	6.9	2.1	-5.7	-4.5	-0.9	3	7.4	10.9	12	11.6	8.8	4.7	1	-3.1	-3	-1.5	2.9	8	12.8	16.3	17.4	17.1	13.7	9.1	4	-0.5	31	28	29	37
Qpe	T-FR-010	4005077	8	237.167	18	33	51.1827	17.9313	210	-0.2	1.5	6.7	13	18.2	21.7	22.8	22.6	18.6	13.6	6.9	2.1	-5.7	-4.5	-0.9	3	7.4	10.9	12	11.6	8.8	4.7	1	-3.1	-3	-1.5	2.9	8	12.8	16.3	17.4	17.1	13.7	9.1	4	-0.5	31	28	29	37
Qpe	T-FR-010	4005078	8	202.452	12	33	51.1827	17.9313	210	-0.2	1.5	6.7	13	18.2	21.7	22.8	22.6	18.6	13.6	6.9	2.1	-5.7	-4.5	-0.9	3	7.4	10.9	12	11.6	8.8	4.7	1	-3.1	-3	-1.5	2.9	8	12.8	16.3	17.4	17.1	13.7	9.1	4	-0.5	31	28	29	37
Qpe	T-FR-010	1001002	8	151.846	46	4	47.8091	0.390286	156.75	6.2	7.6	11.4	14.8	18.1	21.9	24.1	23.6	20.9	15.8	10.1	6.5	0.1	0.6	2.2	4.7	7.6	10.8	12.6	12.3	10.3	6.8	3.5	0.9	3.1	4.1	6.8	9.8	12.8	16.3	18.3	17.9	15.6	11.3	6.8	3.7	68	61	57	53
Qpe	T-FR-010	1001003	8	171.61	19	4	47.8091	0.390286	156.75	6.2	7.6	11.4	14.8	18.1	21.9	24.1	23.6	20.9	15.8	10.1	6.5	0.1	0.6	2.2	4.7	7.6	10.8	12.6	12.3	10.3	6.8	3.5	0.9	3.1	4.1	6.8	9.8	12.8	16.3	18.3	17.9	15.6	11.3	6.8	3.7	68	61	57	53
Qpe	T-FR-010	1001004	8	208.013	24	4	47.8091	0.390286	156.75	6.2	7.6	11.4	14.8	18.1	21.9	24.1	23.6	20.9	15.8	10.1	6.5	0.1	0.6	2.2	4.7	7.6	10.8	12.6	12.3	10.3	6.8	3.5	0.9	3.1	4.1	6.8	9.8	12.8	16.3	18.3	17.9	15.6	11.3	6.8	3.7	68	61	57	53
Qpe	T-FR-010	1002007	8	163.499	22	4	47.8091	0.390286	156.75	6.2	7.6	11.4	14.8	18.1	21.9	24.1	23.6	20.9	15.8	10.1	6.5	0.1	0.6	2.2	4.7	7.6	10.8	12.6	12.3	10.3	6.8	3.5	0.9	3.1	4.1	6.8	9.8	12.8	16.3	18.3	17.9	15.6	11.3	6.8	3.7	68	61	57	53
Qpe	T-FR-010	1002009	8	121.857	24	4	47.8091	0.390286	156.75	6.2	7.6	11.4	14.8	18.1	21.9	24.1	23.6	20.9	15.8	10.1	6.5	0.1	0.6	2.2	4.7	7.6	10.8	12.6	12.3	10.3	6.8	3.5	0.9	3.1	4.1	6.8	9.8	12.8	16.3	18.3	17.9	15.6	11.3	6.8	3.7	68	61	57	53
Qpe	T-FR-010	1002011	8	171.438	24	4	47.8091	0.390286	156.75	6.2	7.6	11.4	14.8	18.1	21.9	24.1	23.6	20.9	15.8	10.1	6.5	0.1	0.6	2.2	4.7	7.6	10.8	12.6	12.3	10.3	6.8	3.5	0.9	3.1	4.1	6.8	9.8	12.8	16.3	18.3	17.9	15.6	11.3	6.8	3.7	68	61	57	53
Qpe	T-FR-010	1002012	8	162.967	24	4	47.8091	0.390286	156.75	6.2	7.6	11.4	14.8	18.1	21.9	24.1	23.6	20.9	15.8	10.1	6.5	0.1	0.6	2.2	4.7	7.6	10.8	12.6	12.3	10.3	6.8	3.5	0.9	3.1	4.1	6.8	9.8	12.8	16.3	18.3	17.9	15.6	11.3	6.8	3.7	68	61	57	53
Qpe	T-FR-010	1003013	8	145.457	47	4	47.8091	0.390286	156.75	6.2	7.6	11.4	14.8	18.1	21.9	24.1	23.6	20.9	15.8	10.1	6.5	0.1	0.6	2.2	4.7	7.6	10.8	12.6	12.3	10.3	6.8	3.5	0.9	3.1	4.1	6.8	9.8	12.8	16.3	18.3	17.9	15.6	11.3	6.8	3.7	68	61	57	53
Qpe	T-FR-010	1003014	8	169.558	47	4	47.8091	0.390286	156.75	6.2	7.6	11.4	14.8	18.1	21.9	24.1	23.6	20.9	15.8	10.1	6.5	0.1	0.6	2.2	4.7	7.6	10.8	12.6	12.3	10.3	6.8	3.5	0.9	3.1	4.1	6.8	9.8	12.8	16.3	18.3	17.9	15.6	11.3	6.8	3.7	68	61	57	53
Qpe	T-FR-010	1003018	8	149.109	24	4	47.8091	0.390286	156.75	6.2	7.6	11.4	14.8	18.1	21.9	24.1	23.6	20.9	15.8	10.1	6.5	0.1	0.6	2.2	4.7	7.6	10.8	12.6	12.3	10.3	6.8	3.5	0.9	3.1	4.1	6.8	9.8	12.8	16.3	18.3	17.9	15.6	11.3	6.8	3.7	68	61	57	53
Qpe	T-FR-010	1004019	8	147.177	24	4	47.8091	0.390286	156.75	6.2	7.6	11.4	14.8	18.1	21.9	24.1	23.6	20.9	15.8	10.1	6.5	0.1	0.6	2.2	4.7	7.6	10.8	12.6	12.3	10.3	6.8	3.5	0.9	3.1	4.1	6.8	9.8	12.8	16.3	18.3	17.9	15.6	11.3	6.8	3.7	68	61	57	53
Qpe	T-FR-010	1004021	8	151.949	47	4	47.8091	0.390286	156.75	6.2	7.6	11.4	14.8	18.1	21.9	24.1	23.6	20.9	15.8	10.1	6.5	0.1	0.6	2.2	4.7	7.6	10.8	12.6	12.3	10.3	6.8	3.5	0.9	3.1	4.1	6.8	9.8	12.8	16.3	18.3	17.9	15.6	11.3	6.8	3.7	68	61	57	53
Qpe	T-FR-010	1004024	8	168.164	22	4	47.8091	0.390286	156.75	6.2	7.6	11.4	14.8	18.1	21.9	24.1	23.6	20.9	15.8	10.1	6.5	0.1	0.6	2.2	4.7	7.6	10.8	12.6	12.3	10.3	6.8	3.5	0.9	3.1	4.1	6.8	9.8	12.8	16.3	18.3	17.9	15.6	11.3	6.8	3.7	68	61	57	53
Qpe	T-FR-010	1005026	8	166.247	19	4	47.8091	0.390286	156.75	6.2	7.6	11.4	14.8	18.1	21.9	24.1	23.6	20.9	15.8	10.1	6.5	0.1	0.6	2.2	4.7	7.6	10.8	12.6	12.3	10.3	6.8	3.5	0.9	3.1	4.1	6.8	9.8	12.8	16.3	18.3	17.9	15.6	11.3	6.8	3.7	68	61	57	53
Qpe	T-FR-010	1005027	8	149.267	22	4	47.8091	0.390286	156.75	6.2	7.6	11.4	14.8	18.1	21.9	24.1	23.6	20.9	15.8	10.1	6.5	0.1	0.6	2.2	4.7	7.6	10.8	12.6	12.3	10.3	6.8	3.5	0.9	3.1	4.1	6.8	9.8	12.8	16.3	18.3	17.9	15.6	11.3	6.8	3.7	68	61	57	53
Qpe	T-FR-010	1005028	8	174.807	24	4	47.8091	0.390286	156.75	6.2	7.6	11.4	14.8	18.1	21.9	24.1	23.6	20.9	15.8	10.1	6.5	0.1	0.6	2.2	4.7	7.6	10.8	12.6	12.3	10.3	6.8	3.5	0.9	3.1	4.1	6.8	9.8	12.8	16.3	18.3	17.9	15.6	11.3	6.8	3.7	68	61	57	53
Qpe	T-FR-010	1005030	8	150.439	24	4	47.8091	0.390286	156.75	6.2	7.6	11.4	14.8	18.1	21.9	24.1	23.6	20.9	15.8	10.1	6.5	0.1	0.6	2.2	4.7	7.6	10.8	12.6	12.3	10.3	6.8	3.5	0.9	3.1	4.1	6.8	9.8	12.8	16.3	18.3	17.9	15.6	11.3	6.8	3.7	68	61	57	53
Qpe	T-FR-010	2001001	8	166.483	20	4	47.8091	0.390286	156.75	6.2	7.6	11.4	14.8	18.1	21.9	24.1	23.6	20.9	15.8	10.1	6.5	0.1	0.6	2.2	4.7	7.6	10.8	12.6	12.3	10.3	6.8	3.5	0.9	3.1	4.1	6.8	9.8	12.8	16.3	18.3	17.9	15.6	11.3	6.8	3.7	68	61	57	53
Qpe	T-FR-010	2001002	8	135.852	19	4	47.8091	0.390286	156.75	6.2	7.6	11.4	14.8	18.1	21.9	24.1	23.6	20.9	15.8	10.1	6.5	0.1	0.6	2.2	4.7	7.6	10.8	12.6	12.3	10.3	6.8	3.5	0.9	3.1	4.1	6.8	9.8	12.8	16.3	18.3	17.9	15.6	11.3	6.8	3.7	68	61	57	53
Qpe	T-FR-010	2001005	8	181.225	19	4	47.8091	0.390286	156.75	6.2	7.6	11.4	14.8	18.1	21.9	24.1	23.6	20.9	15.8	10.1	6.5	0.1	0.6	2.2	4.7	7.6	10.8	12.6	12.3	10.3	6.8	3.5	0.9	3.1	4.1	6.8	9.8	12.8	16.3	18.3	17.9	15.6	11.3	6.8	3.7	68	61	57	53
Qpe	T-FR-010	2001006	8	164.393	20	4	47.8091	0.390286	156.75	6.2	7.6	11.4	14.8	18.1	21.9	24.1	23.6	20.9	15.8	10.1	6.5	0.1	0.6	2.2	4.7	7.6	10.8	12.6	12.3	10.3	6.8	3.5	0.9	3.1	4.1	6.8	9.8	12.8	16.3	18.3	17.9	15.6	11.3	6.8	3.7	68	61	57	53
Qpe	T-FR-010	2002010	8	160.592	18	4	47.8091	0.390286	156.75	6.2	7.6	11.4	14.8	18.1	21.9	24.1	23.6	20.9	15.8	10.1	6.5	0.1	0.6	2.2	4.7	7.6	10.8	12.6	12.3	10.3	6.8	3.5	0.9	3.1	4.1	6.8	9.8	12.8	16.3	18.3	17.9	15.6	11.3	6.8	3.7	68	61	57	53
Qpe	T-FR-010	2002011	8	223.051	20	4	47.8091	0.390286	156.75	6.2	7.6	11.4	14.8	18.1	21.9	24.1	23.6	20.9	15.8	10.1	6.5	0.1	0.6	2.2	4.7	7.6	10.8	12.6	12.3	10.3	6.8	3.5	0.9	3.1	4.1	6.8	9.8	12.8	16.3	18.3	17.9	15.6	11.3	6.8	3.7	68	61	57	53
Qpe	T-FR-010	2003014	8	112.675	17	4	47.8091	0.390286	156.75	6.2	7.6	11.4	14.8	18.1	21.9	24.1	23.6	20.9	15.8	10.1	6.5	0.1	0.6	2.2	4.7	7.6	10.8	12.6	12.3	10.3	6.8	3.5	0.9	3.1	4.1	6.8	9.8	12.8	16.3	18.3	17.9	15.6	11.3	6.8	3.7	68	61	57	53
Qpe	T-FR-010	2003015	8	117.916	19	4	47.8091	0.390286	156.75	6.2	7.6	11.4	14.8	18.1	21.9	24.1	23.6	20.9	15.8	10.1	6.5	0.1	0.6	2.2	4.7	7.6	10.8	12.6	12.3	10.3	6.8	3.5	0.9	3.1	4.1	6.8	9.8	12.8	16.3	18.3	17.9	15.6	11.3	6.8	3.7	68	61	57	53
Qpe	T-FR-010	2003016	8	92.579	43	4	47.8091	0.390286	156.75	6.2	7.6	11.4	14.8	18.1	21.9	24.1	23.6	20.9	15.8	10.1	6.5	0.1	0.6	2.2	4.7	7.6	10.8	12.6	12.3	10.3	6.8	3.5	0.9	3.1	4.1	6.8	9.8	12.8	16.3	18.3	17.9	15.6	11.3	6.8	3.7	68	61	57	53
Qpe	T-FR-010	2004021	8	135.743	15	4	47.8091	0.390286	156.75	6.2	7.6	11.4	14.8	18.1	21.9	24.1	23.6	20.9	15.8	10.1	6.5	0.1	0.6	2.2	4.7	7.6	10.8	12.6	12.3	10.3	6.8	3.5	0.9	3.1	4.1	6.8	9.8	12.8	16.3	18.3	17.9	15.6	11.3	6.8	3.7	68	61	57	53
Qpe	T-FR-010	2004023	8	97.9121	24	4	47.8091	0.390286	156.75	6.2	7.6	11.4	14.8	18.1	21.9	24.1	23.6	20.9	15.8	10.1	6.5	0.1	0.6	2.2	4.7	7.6	10.8	12.6	12.3	10.3	6.8	3.5	0.9	3.1	4.1	6.8	9.8	12.8	16.3	18.3	17.9	15.6	11.3	6.8	3.7	68	61	57	53
Qpe	T-FR-010	2004024	8	154.687	17	4	47.8091	0.390286	156.75	6.2	7.6	11.4	14.8	18.1	21.9	24.1	23.6	20.9	15.8	10.1	6.5	0.1	0.6	2.2	4.7	7.6	10.8	12.6	12.3	10.3	6.8	3.5	0.9	3.1	4.1	6.8	9.8	12.8	16.3	18.3	17.9	15.6	11.3	6.8	3.7	68	61	57	53
Qpe	T-FR-010	2005026	8	147.724	23	4	47.8091	0.390286	156.75	6.2	7.6	11.4	14.8	18.1	21.9	24.1	23.6	20.9	15.8	10.1	6.5	0.1	0.6	2.2	4.7	7.6	10.8	12.6	12.3	10.3	6.8	3.5	0.9	3.1	4.1	6.8	9.8	12.8	16.3	18.3	17.9	15.6	11.3	6.8	3.7	68	61	57	53
Qpe	T-FR-010	2005028	8	144.965	16	4	47.8091	0.390286	156.75	6.2	7.6	11.4	14.8	18.1	21.9	24.1	23.6	20.9	15.8	10.1	6.5	0.1	0.6	2.2	4.7	7.6	10.8	12.6	12.3	10.3	6.8	3.5	0.9	3.1	4.1	6.8	9.8	12.8	16.3	18.3	17.9	15.6	11.3	6.8	3.7	68	61	57	53
Qpe	T-FR-010	2005029	8	152.323	21	4	47.8091	0.390286	156.75	6.2	7.6	11.4	14.8	18.1	21.9	24.1	23.6	20.9	15.8	10.1	6.5	0.1	0.6	2.2	4.7	7.6	10.8	12.6	12.3	10.3	6.8	3.5	0.9	3.1	4.1	6.8	9.8	12.8	16.3	18.3	17.9	15.6	11.3	6.8	3.7	68	61	57	53
Qpe	T-FR-010	2005030	8	195.694	15	4	47.8091	0.390286	156.75	6.2	7.6	11.4	14.8	18.1	21.9	24.1	23.6	20.9	15.8	10.1	6.5	0.1	0.6	2.2	4.7	7.6	10.8	12.6	12.3	10.3	6.8	3.5	0.9	3.1	4.1	6.8	9.8	12.8	16.3	18.3	17.9	15.6	11.3	6.8	3.7	68	61	57	53
Qpe	T-FR-010	2006031	8	138.663	18	4	47.8091	0.390286	156.75	6.2	7.6	11.4	14.8	18.1	21.9	24.1	23.6	20.9	15.8	10.1	6.5	0.1	0.6	2.2	4.7	7.6	10.8	12.6	12.3	10.3	6.8	3.5	0.9	3.1	4.1	6.8	9.8	12.8	16.3	18.3	17.9	15.6	11.3	6.8	3.7	68	61	57	53
Qpe	T-FR-010	2006032	8	127.249	19	4	47.8091	0.390286	156.75	6.2	7.6	11.4	14.8	18.1	21.9	24.1	23.6	20.9	15.8	10.1	6.5	0.1	0.6	2.2	4.7	7.6	10.8	12.6	12.3	10.3	6.8	3.5	0.9	3.1	4.1	6.8	9.8	12.8	16.3	18.3	17.9	15.6	11.3	6.8	3.7	68	61	57	53
Qpe	T-FR-010	2007037	8	127.653	16	4	47.8091	0.390286	156.75	6.2	7.6	11.4	14.8	18.1	21.9	24.1	23.6	20.9	15.8	10.1	6.5	0.1	0.6	2.2	4.7	7.6	10.8	12.6	12.3	10.3	6.8	3.5	0.9	3.1	4.1	6.8	9.8	12.8	16.3	18.3	17.9	15.6	11.3	6.8	3.7	68	61	57	53
Qpe	T-FR-010	2007042	8	142.428	17	4	47.8091	0.390286	156.75	6.2	7.6	11.4	14.8	18.1	21.9	24.1	23.6	20.9	15.8	10.1	6.5	0.1	0.6	2.2	4.7	7.6	10.8	12.6	12.3	10.3	6.8	3.5	0.9	3.1	4.1	6.8	9.8	12.8	16.3	18.3	17.9	15.6	11.3	6.8	3.7	68	61	57	53
Qpe	T-FR-010	2008045	8	143.683	15	4	47.8091	0.390286	156.75	6.2	7.6	11.4	14.8	18.1	21.9	24.1	23.6	20.9	15.8	10.1	6.5	0.1	0.6	2.2	4.7	7.6	10.8	12.6	12.3	10.3	6.8	3.5	0.9	3.1	4.1	6.8	9.8	12.8	16.3	18.3	17.9	15.6	11.3	6.8	3.7	68	61	57	53
Qpe	T-FR-010	2008046	8	144.423	35	4	47.8091	0.390286	156.75	6.2	7.6	11.4	14.8	18.1	21.9	24.1	23.6	20.9	15.8	10.1	6.5	0.1	0.6	2.2	4.7	7.6	10.8	12.6	12.3	10.3	6.8	3.5	0.9	3.1	4.1	6.8	9.8	12.8	16.3	18.3	17.9	15.6	11.3	6.8	3.7	68	61	57	53
Qpe	T-FR-010	2008047	8	145.062	16	4	47.8091	0.390286	156.75	6.2	7.6	11.4	14.8	18.1	21.9	24.1	23.6	20.9	15.8	10.1	6.5	0.1	0.6	2.2	4.7	7.6	10.8	12.6	12.3	10.3	6.8	3.5	0.9	3.1	4.1	6.8	9.8	12.8	16.3	18.3	17.9	15.6	11.3	6.8	3.7	68	61	57	53
Qpe	T-FR-010	2009050	8	168.985	18	4	47.8091	0.390286	156.75	6.2	7.6	11.4	14.8	18.1	21.9	24.1	23.6	20.9	15.8	10.1	6.5	0.1	0.6	2.2	4.7	7.6	10.8	12.6	12.3	10.3	6.8	3.5	0.9	3.1	4.1	6.8	9.8	12.8	16.3	18.3	17.9	15.6	11.3	6.8	3.7	68	61	57	53
Qpe	T-FR-010	2009052	8	164.141	13	4	47.8091	0.390286	156.75	6.2	7.6	11.4	14.8	18.1	21.9	24.1	23.6	20.9	15.8	10.1	6.5	0.1	0.6	2.2	4.7	7.6	10.8	12.6	12.3	10.3	6.8	3.5	0.9	3.1	4.1	6.8	9.8	12.8	16.3	18.3	17.9	15.6	11.3	6.8	3.7	68	61	57	53
Qpe	T-FR-010	2010055	8	106.258	17	4	47.8091	0.390286	156.75	6.2	7.6	11.4	14.8	18.1	21.9	24.1	23.6	20.9	15.8	10.1	6.5	0.1	0.6	2.2	4.7	7.6	10.8	12.6	12.3	10.3	6.8	3.5	0.9	3.1	4.1	6.8	9.8	12.8	16.3	18.3	17.9	15.6	11.3	6.8	3.7	68	61	57	53
Qpe	T-FR-010	2010057	8	180.887	20	4	47.8091	0.390286	156.75	6.2	7.6	11.4	14.8	18.1	21.9	24.1	23.6	20.9	15.8	10.1	6.5	0.1	0.6	2.2	4.7	7.6	10.8	12.6	12.3	10.3	6.8	3.5	0.9	3.1	4.1	6.8	9.8	12.8	16.3	18.3	17.9	15.6	11.3	6.8	3.7	68	61	57	53
Qpe	T-FR-010	2010058	8	133.192	18	4	47.8091	0.390286	156.75	6.2	7.6	11.4	14.8	18.1	21.9	24.1	23.6	20.9	15.8	10.1	6.5	0.1	0.6	2.2	4.7	7.6	10.8	12.6	12.3	10.3	6.8	3.5	0.9	3.1	4.1	6.8	9.8	12.8	16.3	18.3	17.9	15.6	11.3	6.8	3.7	68	61	57	53
Qpe	T-FR-010	2010060	8	136.309	18	4	47.8091	0.390286	156.75	6.2	7.6	11.4	14.8	18.1	21.9	24.1	23.6	20.9	15.8	10.1	6.5	0.1	0.6	2.2	4.7	7.6	10.8	12.6	12.3	10.3	6.8	3.5	0.9	3.1	4.1	6.8	9.8	12.8	16.3	18.3	17.9	15.6	11.3	6.8	3.7	68	61	57	53
Qpe	T-FR-010	4001005	8	133.512	12	4	47.8091	0.390286	156.75	6.2	7.6	11.4	14.8	18.1	21.9	24.1	23.6	20.9	15.8	10.1	6.5	0.1	0.6	2.2	4.7	7.6	10.8	12.6	12.3	10.3	6.8	3.5	0.9	3.1	4.1	6.8	9.8	12.8	16.3	18.3	17.9	15.6	11.3	6.8	3.7	68	61	57	53
Qpe	T-FR-010	4001007	8	135.347	14	4	47.8091	0.390286	156.75	6.2	7.6	11.4	14.8	18.1	21.9	24.1	23.6	20.9	15.8	10.1	6.5	0.1	0.6	2.2	4.7	7.6	10.8	12.6	12.3	10.3	6.8	3.5	0.9	3.1	4.1	6.8	9.8	12.8	16.3	18.3	17.9	15.6	11.3	6.8	3.7	68	61	57	53
Qpe	T-FR-010	4001016	8	83.5714	2	4	47.8091	0.390286	156.75	6.2	7.6	11.4	14.8	18.1	21.9	24.1	23.6	20.9	15.8	10.1	6.5	0.1	0.6	2.2	4.7	7.6	10.8	12.6	12.3	10.3	6.8	3.5	0.9	3.1	4.1	6.8	9.8	12.8	16.3	18.3	17.9	15.6	11.3	6.8	3.7	68	61	57	53
Qpe	T-FR-010	4002018	8	110.825	9	4	47.8091	0.390286	156.75	6.2	7.6	11.4	14.8	18.1	21.9	24.1	23.6	20.9	15.8	10.1	6.5	0.1	0.6	2.2	4.7	7.6	10.8	12.6	12.3	10.3	6.8	3.5	0.9	3.1	4.1	6.8	9.8	12.8	16.3	18.3	17.9	15.6	11.3	6.8	3.7	68	61	57	53
Qpe	T-FR-010	4002021	8	96.6746	18	4	47.8091	0.390286	156.75	6.2	7.6	11.4	14.8	18.1	21.9	24.1	23.6	20.9	15.8	10.1	6.5	0.1	0.6	2.2	4.7	7.6	10.8	12.6	12.3	10.3	6.8	3.5	0.9	3.1	4.1	6.8	9.8	12.8	16.3	18.3	17.9	15.6	11.3	6.8	3.7	68	61	57	53
Qpe	T-FR-010	4002028	8	144.714	9	4	47.8091	0.390286	156.75	6.2	7.6	11.4	14.8	18.1	21.9	24.1	23.6	20.9	15.8	10.1	6.5	0.1	0.6	2.2	4.7	7.6	10.8	12.6	12.3	10.3	6.8	3.5	0.9	3.1	4.1	6.8	9.8	12.8	16.3	18.3	17.9	15.6	11.3	6.8	3.7	68	61	57	53
Qpe	T-FR-010	4003040	8	175.701	11	4	47.8091	0.390286	156.75	6.2	7.6	11.4	14.8	18.1	21.9	24.1	23.6	20.9	15.8	10.1	6.5	0.1	0.6	2.2	4.7	7.6	10.8	12.6	12.3	10.3	6.8	3.5	0.9	3.1	4.1	6.8	9.8	12.8	16.3	18.3	17.9	15.6	11.3	6.8	3.7	68	61	57	53
Qpe	T-FR-010	4003046	8	278.681	17	4	47.8091	0.390286	156.75	6.2	7.6	11.4	14.8	18.1	21.9	24.1	23.6	20.9	15.8	10.1	6.5	0.1	0.6	2.2	4.7	7.6	10.8	12.6	12.3	10.3	6.8	3.5	0.9	3.1	4.1	6.8	9.8	12.8	16.3	18.3	17.9	15.6	11.3	6.8	3.7	68	61	57	53
Qpe	T-FR-010	4003047	8	110.42	16	4	47.8091	0.390286	156.75	6.2	7.6	11.4	14.8	18.1	21.9	24.1	23.6	20.9	15.8	10.1	6.5	0.1	0.6	2.2	4.7	7.6	10.8	12.6	12.3	10.3	6.8	3.5	0.9	3.1	4.1	6.8	9.8	12.8	16.3	18.3	17.9	15.6	11.3	6.8	3.7	68	61	57	53
Qpe	T-FR-010	4004056	8	350.407	20	4	47.8091	0.390286	156.75	6.2	7.6	11.4	14.8	18.1	21.9	24.1	23.6	20.9	15.8	10.1	6.5	0.1	0.6	2.2	4.7	7.6	10.8	12.6	12.3	10.3	6.8	3.5	0.9	3.1	4.1	6.8	9.8	12.8	16.3	18.3	17.9	15.6	11.3	6.8	3.7	68	61	57	53
Qpe	T-FR-010	4004060	8	216.479	17	4	47.8091	0.390286	156.75	6.2	7.6	11.4	14.8	18.1	21.9	24.1	23.6	20.9	15.8	10.1	6.5	0.1	0.6	2.2	4.7	7.6	10.8	12.6	12.3	10.3	6.8	3.5	0.9	3.1	4.1	6.8	9.8	12.8	16.3	18.3	17.9	15.6	11.3	6.8	3.7	68	61	57	53
Qpe	T-FR-010	4004068	8	311.041	21	4	47.8091	0.390286	156.75	6.2	7.6	11.4	14.8	18.1	21.9	24.1	23.6	20.9	15.8	10.1	6.5	0.1	0.6	2.2	4.7	7.6	10.8	12.6	12.3	10.3	6.8	3.5	0.9	3.1	4.1	6.8	9.8	12.8	16.3	18.3	17.9	15.6	11.3	6.8	3.7	68	61	57	53
Qpe	T-FR-010	4005069	8	165.592	21	4	47.8091	0.390286	156.75	6.2	7.6	11.4	14.8	18.1	21.9	24.1	23.6	20.9	15.8	10.1	6.5	0.1	0.6	2.2	4.7	7.6	10.8	12.6	12.3	10.3	6.8	3.5	0.9	3.1	4.1	6.8	9.8	12.8	16.3	18.3	17.9	15.6	11.3	6.8	3.7	68	61	57	53
Qpe	T-FR-010	4005070	8	143.643	24	4	47.8091	0.390286	156.75	6.2	7.6	11.4	14.8	18.1	21.9	24.1	23.6	20.9	15.8	10.1	6.5	0.1	0.6	2.2	4.7	7.6	10.8	12.6	12.3	10.3	6.8	3.5	0.9	3.1	4.1	6.8	9.8	12.8	16.3	18.3	17.9	15.6	11.3	6.8	3.7	68	61	57	53
Qpe	T-FR-010	4005080	8	177.786	16	4	47.8091	0.390286	156.75	6.2	7.6	11.4	14.8	18.1	21.9	24.1	23.6	20.9	15.8	10.1	6.5	0.1	0.6	2.2	4.7	7.6	10.8	12.6	12.3	10.3	6.8	3.5	0.9	3.1	4.1	6.8	9.8	12.8	16.3	18.3	17.9	15.6	11.3	6.8	3.7	68	61	57	53
Qpe	T-FR-010	5001004	8	301.409	22	4	47.8091	0.390286	156.75	6.2	7.6	11.4	14.8	18.1	21.9	24.1	23.6	20.9	15.8	10.1	6.5	0.1	0.6	2.2	4.7	7.6	10.8	12.6	12.3	10.3	6.8	3.5	0.9	3.1	4.1	6.8	9.8	12.8	16.3	18.3	17.9	15.6	11.3	6.8	3.7	68	61	57	53
Qpe	T-FR-010	5001005	8	115.394	22	4	47.8091	0.390286	156.75	6.2	7.6	11.4	14.8	18.1	21.9	24.1	23.6	20.9	15.8	10.1	6.5	0.1	0.6	2.2	4.7	7.6	10.8	12.6	12.3	10.3	6.8	3.5	0.9	3.1	4.1	6.8	9.8	12.8	16.3	18.3	17.9	15.6	11.3	6.8	3.7	68	61	57	53
Qpe	T-FR-010	5001007	8	184.25	20	4	47.8091	0.390286	156.75	6.2	7.6	11.4	14.8	18.1	21.9	24.1	23.6	20.9	15.8	10.1	6.5	0.1	0.6	2.2	4.7	7.6	10.8	12.6	12.3	10.3	6.8	3.5	0.9	3.1	4.1	6.8	9.8	12.8	16.3	18.3	17.9	15.6	11.3	6.8	3.7	68	61	57	53
Qpe	T-FR-010	5001008	8	336.145	23	4	47.8091	0.390286	156.75	6.2	7.6	11.4	14.8	18.1	21.9	24.1	23.6	20.9	15.8	10.1	6.5	0.1	0.6	2.2	4.7	7.6	10.8	12.6	12.3	10.3	6.8	3.5	0.9	3.1	4.1	6.8	9.8	12.8	16.3	18.3	17.9	15.6	11.3	6.8	3.7	68	61	57	53
Qpe	T-FR-010	5001009	8	297.275	23	4	47.8091	0.390286	156.75	6.2	7.6	11.4	14.8	18.1	21.9	24.1	23.6	20.9	15.8	10.1	6.5	0.1	0.6	2.2	4.7	7.6	10.8	12.6	12.3	10.3	6.8	3.5	0.9	3.1	4.1	6.8	9.8	12.8	16.3	18.3	17.9	15.6	11.3	6.8	3.7	68	61	57	53
Qpe	T-FR-010	5001010	8	239.167	20	4	47.8091	0.390286	156.75	6.2	7.6	11.4	14.8	18.1	21.9	24.1	23.6	20.9	15.8	10.1	6.5	0.1	0.6	2.2	4.7	7.6	10.8	12.6	12.3	10.3	6.8	3.5	0.9	3.1	4.1	6.8	9.8	12.8	16.3	18.3	17.9	15.6	11.3	6.8	3.7	68	61	57	53
Qpe	T-FR-010	5002011	8	206.035	19	4	47.8091	0.390286	156.75	6.2	7.6	11.4	14.8	18.1	21.9	24.1	23.6	20.9	15.8	10.1	6.5	0.1	0.6	2.2	4.7	7.6	10.8	12.6	12.3	10.3	6.8	3.5	0.9	3.1	4.1	6.8	9.8	12.8	16.3	18.3	17.9	15.6	11.3	6.8	3.7	68	61	57	53
Qpe	T-FR-010	5002013	8	227.825	21	4	47.8091	0.390286	156.75	6.2	7.6	11.4	14.8	18.1	21.9	24.1	23.6	20.9	15.8	10.1	6.5	0.1	0.6	2.2	4.7	7.6	10.8	12.6	12.3	10.3	6.8	3.5	0.9	3.1	4.1	6.8	9.8	12.8	16.3	18.3	17.9	15.6	11.3	6.8	3.7	68	61	57	53
Qpe	T-FR-010	5002016	8	214.159	21	4	47.8091	0.390286	156.75	6.2	7.6	11.4	14.8	18.1	21.9	24.1	23.6	20.9	15.8	10.1	6.5	0.1	0.6	2.2	4.7	7.6	10.8	12.6	12.3	10.3	6.8	3.5	0.9	3.1	4.1	6.8	9.8	12.8	16.3	18.3	17.9	15.6	11.3	6.8	3.7	68	61	57	53
Qpe	T-FR-010	5002018	8	172.511	15	4	47.8091	0.390286	156.75	6.2	7.6	11.4	14.8	18.1	21.9	24.1	23.6	20.9	15.8	10.1	6.5	0.1	0.6	2.2	4.7	7.6	10.8	12.6	12.3	10.3	6.8	3.5	0.9	3.1	4.1	6.8	9.8	12.8	16.3	18.3	17.9	15.6	11.3	6.8	3.7	68	61	57	53
Qpe	T-FR-010	4001001	8	121.337	14	41	56.1315	9.396	250	1.3	1.9	4.1	7.8	13.6	16.9	17.9	18.1	14.6	10.5	6	2.9	-6	-6	-2.9	1.3	6.1	9.4	11	10.2	7.8	4.5	-0.4	-0.8	-2.4	-2	0.6	4.6	9.8	13.1	14.5	14.1	11.2	7.5	2.8	1.1	61	42	47	47
Qpe	T-FR-010	4001008	8	110.134	17	41	56.1315	9.396	250	1.3	1.9	4.1	7.8	13.6	16.9	17.9	18.1	14.6	10.5	6	2.9	-6	-6	-2.9	1.3	6.1	9.4	11	10.2	7.8	4.5	-0.4	-0.8	-2.4	-2	0.6	4.6	9.8	13.1	14.5	14.1	11.2	7.5	2.8	1.1	61	42	47	47
Qpe	T-FR-010	4002026	8	99.7357	20	41	56.1315	9.396	250	1.3	1.9	4.1	7.8	13.6	16.9	17.9	18.1	14.6	10.5	6	2.9	-6	-6	-2.9	1.3	6.1	9.4	11	10.2	7.8	4.5	-0.4	-0.8	-2.4	-2	0.6	4.6	9.8	13.1	14.5	14.1	11.2	7.5	2.8	1.1	61	42	47	47
Qpe	T-FR-010	4002032	8	85.5905	15	41	56.1315	9.396	250	1.3	1.9	4.1	7.8	13.6	16.9	17.9	18.1	14.6	10.5	6	2.9	-6	-6	-2.9	1.3	6.1	9.4	11	10.2	7.8	4.5	-0.4	-0.8	-2.4	-2	0.6	4.6	9.8	13.1	14.5	14.1	11.2	7.5	2.8	1.1	61	42	47	47
Qpe	T-FR-010	4003042	8	248.979	20	41	56.1315	9.396	250	1.3	1.9	4.1	7.8	13.6	16.9	17.9	18.1	14.6	10.5	6	2.9	-6	-6	-2.9	1.3	6.1	9.4	11	10.2	7.8	4.5	-0.4	-0.8	-2.4	-2	0.6	4.6	9.8	13.1	14.5	14.1	11.2	7.5	2.8	1.1	61	42	47	47
Qpe	T-FR-010	4003043	8	252.812	19	41	56.1315	9.396	250	1.3	1.9	4.1	7.8	13.6	16.9	17.9	18.1	14.6	10.5	6	2.9	-6	-6	-2.9	1.3	6.1	9.4	11	10.2	7.8	4.5	-0.4	-0.8	-2.4	-2	0.6	4.6	9.8	13.1	14.5	14.1	11.2	7.5	2.8	1.1	61	42	47	47
Qpe	T-FR-010	4004055	8	165.991	16	41	56.1315	9.396	250	1.3	1.9	4.1	7.8	13.6	16.9	17.9	18.1	14.6	10.5	6	2.9	-6	-6	-2.9	1.3	6.1	9.4	11	10.2	7.8	4.5	-0.4	-0.8	-2.4	-2	0.6	4.6	9.8	13.1	14.5	14.1	11.2	7.5	2.8	1.1	61	42	47	47
Qpe	T-FR-010	4004066	8	362.571	17	41	56.1315	9.396	250	1.3	1.9	4.1	7.8	13.6	16.9	17.9	18.1	14.6	10.5	6	2.9	-6	-6	-2.9	1.3	6.1	9.4	11	10.2	7.8	4.5	-0.4	-0.8	-2.4	-2	0.6	4.6	9.8	13.1	14.5	14.1	11.2	7.5	2.8	1.1	61	42	47	47
Qpe	T-FR-010	4005072	8	188.449	21	41	56.1315	9.396	250	1.3	1.9	4.1	7.8	13.6	16.9	17.9	18.1	14.6	10.5	6	2.9	-6	-6	-2.9	1.3	6.1	9.4	11	10.2	7.8	4.5	-0.4	-0.8	-2.4	-2	0.6	4.6	9.8	13.1	14.5	14.1	11.2	7.5	2.8	1.1	61	42	47	47
Qpe	T-FR-010	4005075	8	94.7755	14	41	56.1315	9.396	250	1.3	1.9	4.1	7.8	13.6	16.9	17.9	18.1	14.6	10.5	6	2.9	-6	-6	-2.9	1.3	6.1	9.4	11	10.2	7.8	4.5	-0.4	-0.8	-2.4	-2	0.6	4.6	9.8	13.1	14.5	14.1	11.2	7.5	2.8	1.1	61	42	47	47
Qpe	T-FR-010	1001003	8	132.705	22	50	46.604	0.178	130	6.9	8.3	12.3	15.4	18.5	22.5	24.6	24.1	21.8	16.6	11	7.3	0.6	1.2	2.8	5.3	8	11.4	13.2	12.8	11.1	7.4	4.1	1.3	3.7	4.7	7.5	10.3	13.2	16.9	18.9	18.5	16.4	12	7.5	4.3	70	62	57	53
Qpe	T-FR-010	1001006	8	152.033	19	50	46.604	0.178	130	6.9	8.3	12.3	15.4	18.5	22.5	24.6	24.1	21.8	16.6	11	7.3	0.6	1.2	2.8	5.3	8	11.4	13.2	12.8	11.1	7.4	4.1	1.3	3.7	4.7	7.5	10.3	13.2	16.9	18.9	18.5	16.4	12	7.5	4.3	70	62	57	53
Qpe	T-FR-010	1002007	8	184.438	24	50	46.604	0.178	130	6.9	8.3	12.3	15.4	18.5	22.5	24.6	24.1	21.8	16.6	11	7.3	0.6	1.2	2.8	5.3	8	11.4	13.2	12.8	11.1	7.4	4.1	1.3	3.7	4.7	7.5	10.3	13.2	16.9	18.9	18.5	16.4	12	7.5	4.3	70	62	57	53
Qpe	T-FR-010	1002010	8	127.148	24	50	46.604	0.178	130	6.9	8.3	12.3	15.4	18.5	22.5	24.6	24.1	21.8	16.6	11	7.3	0.6	1.2	2.8	5.3	8	11.4	13.2	12.8	11.1	7.4	4.1	1.3	3.7	4.7	7.5	10.3	13.2	16.9	18.9	18.5	16.4	12	7.5	4.3	70	62	57	53
Qpe	T-FR-010	1003015	8	143.452	24	50	46.604	0.178	130	6.9	8.3	12.3	15.4	18.5	22.5	24.6	24.1	21.8	16.6	11	7.3	0.6	1.2	2.8	5.3	8	11.4	13.2	12.8	11.1	7.4	4.1	1.3	3.7	4.7	7.5	10.3	13.2	16.9	18.9	18.5	16.4	12	7.5	4.3	70	62	57	53
Qpe	T-FR-010	1003018	8	172.095	24	50	46.604	0.178	130	6.9	8.3	12.3	15.4	18.5	22.5	24.6	24.1	21.8	16.6	11	7.3	0.6	1.2	2.8	5.3	8	11.4	13.2	12.8	11.1	7.4	4.1	1.3	3.7	4.7	7.5	10.3	13.2	16.9	18.9	18.5	16.4	12	7.5	4.3	70	62	57	53
Qpe	T-FR-010	1004022	8	141.49	24	50	46.604	0.178	130	6.9	8.3	12.3	15.4	18.5	22.5	24.6	24.1	21.8	16.6	11	7.3	0.6	1.2	2.8	5.3	8	11.4	13.2	12.8	11.1	7.4	4.1	1.3	3.7	4.7	7.5	10.3	13.2	16.9	18.9	18.5	16.4	12	7.5	4.3	70	62	57	53
Qpe	T-FR-010	1004024	8	130.702	22	50	46.604	0.178	130	6.9	8.3	12.3	15.4	18.5	22.5	24.6	24.1	21.8	16.6	11	7.3	0.6	1.2	2.8	5.3	8	11.4	13.2	12.8	11.1	7.4	4.1	1.3	3.7	4.7	7.5	10.3	13.2	16.9	18.9	18.5	16.4	12	7.5	4.3	70	62	57	53
Qpe	T-FR-010	1005027	8	158.829	22	50	46.604	0.178	130	6.9	8.3	12.3	15.4	18.5	22.5	24.6	24.1	21.8	16.6	11	7.3	0.6	1.2	2.8	5.3	8	11.4	13.2	12.8	11.1	7.4	4.1	1.3	3.7	4.7	7.5	10.3	13.2	16.9	18.9	18.5	16.4	12	7.5	4.3	70	62	57	53
Qpe	T-FR-010	1005028	8	163.529	23	50	46.604	0.178	130	6.9	8.3	12.3	15.4	18.5	22.5	24.6	24.1	21.8	16.6	11	7.3	0.6	1.2	2.8	5.3	8	11.4	13.2	12.8	11.1	7.4	4.1	1.3	3.7	4.7	7.5	10.3	13.2	16.9	18.9	18.5	16.4	12	7.5	4.3	70	62	57	53
Qpe	T-FR-010	2001003	8	203.887	17	77	47.761	5.487	330	3.4	5.3	10	14.1	17.8	21.1	23.4	22.9	20.1	14.5	8.2	3.9	-1.8	-1.3	1.3	4.4	7.7	11.1	12.9	12.5	10.4	6.2	2	-0.9	0.8	2	5.6	9.2	12.7	16.1	18.1	17.7	15.3	10.4	5.1	1.5	83	71	72	56
Qpe	T-FR-010	2002009	8	227.054	17	77	47.761	5.487	330	3.4	5.3	10	14.1	17.8	21.1	23.4	22.9	20.1	14.5	8.2	3.9	-1.8	-1.3	1.3	4.4	7.7	11.1	12.9	12.5	10.4	6.2	2	-0.9	0.8	2	5.6	9.2	12.7	16.1	18.1	17.7	15.3	10.4	5.1	1.5	83	71	72	56
Qpe	T-FR-010	2003018	8	140.961	18	77	47.761	5.487	330	3.4	5.3	10	14.1	17.8	21.1	23.4	22.9	20.1	14.5	8.2	3.9	-1.8	-1.3	1.3	4.4	7.7	11.1	12.9	12.5	10.4	6.2	2	-0.9	0.8	2	5.6	9.2	12.7	16.1	18.1	17.7	15.3	10.4	5.1	1.5	83	71	72	56
Qpe	T-FR-010	2004024	8	135.141	15	77	47.761	5.487	330	3.4	5.3	10	14.1	17.8	21.1	23.4	22.9	20.1	14.5	8.2	3.9	-1.8	-1.3	1.3	4.4	7.7	11.1	12.9	12.5	10.4	6.2	2	-0.9	0.8	2	5.6	9.2	12.7	16.1	18.1	17.7	15.3	10.4	5.1	1.5	83	71	72	56
Qpe	T-FR-010	2005028	8	134.972	12	77	47.761	5.487	330	3.4	5.3	10	14.1	17.8	21.1	23.4	22.9	20.1	14.5	8.2	3.9	-1.8	-1.3	1.3	4.4	7.7	11.1	12.9	12.5	10.4	6.2	2	-0.9	0.8	2	5.6	9.2	12.7	16.1	18.1	17.7	15.3	10.4	5.1	1.5	83	71	72	56
Qpe	T-FR-010	2006032	8	147.224	23	77	47.761	5.487	330	3.4	5.3	10	14.1	17.8	21.1	23.4	22.9	20.1	14.5	8.2	3.9	-1.8	-1.3	1.3	4.4	7.7	11.1	12.9	12.5	10.4	6.2	2	-0.9	0.8	2	5.6	9.2	12.7	16.1	18.1	17.7	15.3	10.4	5.1	1.5	83	71	72	56
Qpe	T-FR-010	2007041	8	167.052	20	77	47.761	5.487	330	3.4	5.3	10	14.1	17.8	21.1	23.4	22.9	20.1	14.5	8.2	3.9	-1.8	-1.3	1.3	4.4	7.7	11.1	12.9	12.5	10.4	6.2	2	-0.9	0.8	2	5.6	9.2	12.7	16.1	18.1	17.7	15.3	10.4	5.1	1.5	83	71	72	56
Qpe	T-FR-010	2008046	8	133.265	13	77	47.761	5.487	330	3.4	5.3	10	14.1	17.8	21.1	23.4	22.9	20.1	14.5	8.2	3.9	-1.8	-1.3	1.3	4.4	7.7	11.1	12.9	12.5	10.4	6.2	2	-0.9	0.8	2	5.6	9.2	12.7	16.1	18.1	17.7	15.3	10.4	5.1	1.5	83	71	72	56
Qpe	T-FR-010	2009052	8	155.2	9	77	47.761	5.487	330	3.4	5.3	10	14.1	17.8	21.1	23.4	22.9	20.1	14.5	8.2	3.9	-1.8	-1.3	1.3	4.4	7.7	11.1	12.9	12.5	10.4	6.2	2	-0.9	0.8	2	5.6	9.2	12.7	16.1	18.1	17.7	15.3	10.4	5.1	1.5	83	71	72	56
Qpe	T-FR-010	2010059	8	146.465	14	77	47.761	5.487	330	3.4	5.3	10	14.1	17.8	21.1	23.4	22.9	20.1	14.5	8.2	3.9	-1.8	-1.3	1.3	4.4	7.7	11.1	12.9	12.5	10.4	6.2	2	-0.9	0.8	2	5.6	9.2	12.7	16.1	18.1	17.7	15.3	10.4	5.1	1.5	83	71	72	56
Qpe	T-FR-010	4001006	8	105.018	16	77	47.761	5.487	330	3.4	5.3	10	14.1	17.8	21.1	23.4	22.9	20.1	14.5	8.2	3.9	-1.8	-1.3	1.3	4.4	7.7	11.1	12.9	12.5	10.4	6.2	2	-0.9	0.8	2	5.6	9.2	12.7	16.1	18.1	17.7	15.3	10.4	5.1	1.5	83	71	72	56
Qpe	T-FR-010	4001011	8	139.4	15	77	47.761	5.487	330	3.4	5.3	10	14.1	17.8	21.1	23.4	22.9	20.1	14.5	8.2	3.9	-1.8	-1.3	1.3	4.4	7.7	11.1	12.9	12.5	10.4	6.2	2	-0.9	0.8	2	5.6	9.2	12.7	16.1	18.1	17.7	15.3	10.4	5.1	1.5	83	71	72	56
Qpe	T-FR-010	4001014	8	140.214	14	77	47.761	5.487	330	3.4	5.3	10	14.1	17.8	21.1	23.4	22.9	20.1	14.5	8.2	3.9	-1.8	-1.3	1.3	4.4	7.7	11.1	12.9	12.5	10.4	6.2	2	-0.9	0.8	2	5.6	9.2	12.7	16.1	18.1	17.7	15.3	10.4	5.1	1.5	83	71	72	56
Qpe	T-FR-010	4002021	8	110.543	15	77	47.761	5.487	330	3.4	5.3	10	14.1	17.8	21.1	23.4	22.9	20.1	14.5	8.2	3.9	-1.8	-1.3	1.3	4.4	7.7	11.1	12.9	12.5	10.4	6.2	2	-0.9	0.8	2	5.6	9.2	12.7	16.1	18.1	17.7	15.3	10.4	5.1	1.5	83	71	72	56
Qpe	T-FR-010	4002033	8	122.429	13	77	47.761	5.487	330	3.4	5.3	10	14.1	17.8	21.1	23.4	22.9	20.1	14.5	8.2	3.9	-1.8	-1.3	1.3	4.4	7.7	11.1	12.9	12.5	10.4	6.2	2	-0.9	0.8	2	5.6	9.2	12.7	16.1	18.1	17.7	15.3	10.4	5.1	1.5	83	71	72	56
Qpe	T-FR-010	4002034	8	171.134	16	77	47.761	5.487	330	3.4	5.3	10	14.1	17.8	21.1	23.4	22.9	20.1	14.5	8.2	3.9	-1.8	-1.3	1.3	4.4	7.7	11.1	12.9	12.5	10.4	6.2	2	-0.9	0.8	2	5.6	9.2	12.7	16.1	18.1	17.7	15.3	10.4	5.1	1.5	83	71	72	56
Qpe	T-FR-010	4003042	8	316.464	20	77	47.761	5.487	330	3.4	5.3	10	14.1	17.8	21.1	23.4	22.9	20.1	14.5	8.2	3.9	-1.8	-1.3	1.3	4.4	7.7	11.1	12.9	12.5	10.4	6.2	2	-0.9	0.8	2	5.6	9.2	12.7	16.1	18.1	17.7	15.3	10.4	5.1	1.5	83	71	72	56
Qpe	T-FR-010	4003044	8	382.211	21	77	47.761	5.487	330	3.4	5.3	10	14.1	17.8	21.1	23.4	22.9	20.1	14.5	8.2	3.9	-1.8	-1.3	1.3	4.4	7.7	11.1	12.9	12.5	10.4	6.2	2	-0.9	0.8	2	5.6	9.2	12.7	16.1	18.1	17.7	15.3	10.4	5.1	1.5	83	71	72	56
Qpe	T-FR-010	4003049	8	114.726	12	77	47.761	5.487	330	3.4	5.3	10	14.1	17.8	21.1	23.4	22.9	20.1	14.5	8.2	3.9	-1.8	-1.3	1.3	4.4	7.7	11.1	12.9	12.5	10.4	6.2	2	-0.9	0.8	2	5.6	9.2	12.7	16.1	18.1	17.7	15.3	10.4	5.1	1.5	83	71	72	56
Qpe	T-FR-010	4004060	8	238.939	21	77	47.761	5.487	330	3.4	5.3	10	14.1	17.8	21.1	23.4	22.9	20.1	14.5	8.2	3.9	-1.8	-1.3	1.3	4.4	7.7	11.1	12.9	12.5	10.4	6.2	2	-0.9	0.8	2	5.6	9.2	12.7	16.1	18.1	17.7	15.3	10.4	5.1	1.5	83	71	72	56
Qpe	T-FR-010	4004061	8	225.361	21	77	47.761	5.487	330	3.4	5.3	10	14.1	17.8	21.1	23.4	22.9	20.1	14.5	8.2	3.9	-1.8	-1.3	1.3	4.4	7.7	11.1	12.9	12.5	10.4	6.2	2	-0.9	0.8	2	5.6	9.2	12.7	16.1	18.1	17.7	15.3	10.4	5.1	1.5	83	71	72	56
Qpe	T-FR-010	4004062	8	297.536	20	77	47.761	5.487	330	3.4	5.3	10	14.1	17.8	21.1	23.4	22.9	20.1	14.5	8.2	3.9	-1.8	-1.3	1.3	4.4	7.7	11.1	12.9	12.5	10.4	6.2	2	-0.9	0.8	2	5.6	9.2	12.7	16.1	18.1	17.7	15.3	10.4	5.1	1.5	83	71	72	56
Qpe	T-FR-010	4005072	8	179.462	17	77	47.761	5.487	330	3.4	5.3	10	14.1	17.8	21.1	23.4	22.9	20.1	14.5	8.2	3.9	-1.8	-1.3	1.3	4.4	7.7	11.1	12.9	12.5	10.4	6.2	2	-0.9	0.8	2	5.6	9.2	12.7	16.1	18.1	17.7	15.3	10.4	5.1	1.5	83	71	72	56
Qpe	T-FR-010	4005076	8	166.697	17	77	47.761	5.487	330	3.4	5.3	10	14.1	17.8	21.1	23.4	22.9	20.1	14.5	8.2	3.9	-1.8	-1.3	1.3	4.4	7.7	11.1	12.9	12.5	10.4	6.2	2	-0.9	0.8	2	5.6	9.2	12.7	16.1	18.1	17.7	15.3	10.4	5.1	1.5	83	71	72	56
Qpe	T-FR-010	4005081	8	141.101	17	77	47.761	5.487	330	3.4	5.3	10	14.1	17.8	21.1	23.4	22.9	20.1	14.5	8.2	3.9	-1.8	-1.3	1.3	4.4	7.7	11.1	12.9	12.5	10.4	6.2	2	-0.9	0.8	2	5.6	9.2	12.7	16.1	18.1	17.7	15.3	10.4	5.1	1.5	83	71	72	56
Qpe	T-FR-010	4001002	8	131.555	26	87	49.361	7.872	470	1.1	3.3	7.3	12	16.1	19.9	21.3	20.4	18.6	13	6.2	3	-3.8	-3.2	-0.9	2.4	5.9	9.4	10.9	10.5	8.2	4.6	0.4	-2.2	-1.4	0	3.2	7.2	11	14.6	16.1	15.4	13.4	8.8	3.3	0.4	63	54	51	52
Qpe	T-FR-010	4001005	8	131.482	16	87	49.361	7.872	470	1.1	3.3	7.3	12	16.1	19.9	21.3	20.4	18.6	13	6.2	3	-3.8	-3.2	-0.9	2.4	5.9	9.4	10.9	10.5	8.2	4.6	0.4	-2.2	-1.4	0	3.2	7.2	11	14.6	16.1	15.4	13.4	8.8	3.3	0.4	63	54	51	52
Qpe	T-FR-010	4001009	8	108.636	11	87	49.361	7.872	470	1.1	3.3	7.3	12	16.1	19.9	21.3	20.4	18.6	13	6.2	3	-3.8	-3.2	-0.9	2.4	5.9	9.4	10.9	10.5	8.2	4.6	0.4	-2.2	-1.4	0	3.2	7.2	11	14.6	16.1	15.4	13.4	8.8	3.3	0.4	63	54	51	52
Qpe	T-FR-010	4002019	8	115.622	14	87	49.361	7.872	470	1.1	3.3	7.3	12	16.1	19.9	21.3	20.4	18.6	13	6.2	3	-3.8	-3.2	-0.9	2.4	5.9	9.4	10.9	10.5	8.2	4.6	0.4	-2.2	-1.4	0	3.2	7.2	11	14.6	16.1	15.4	13.4	8.8	3.3	0.4	63	54	51	52
Qpe	T-FR-010	4002020	8	85.6104	11	87	49.361	7.872	470	1.1	3.3	7.3	12	16.1	19.9	21.3	20.4	18.6	13	6.2	3	-3.8	-3.2	-0.9	2.4	5.9	9.4	10.9	10.5	8.2	4.6	0.4	-2.2	-1.4	0	3.2	7.2	11	14.6	16.1	15.4	13.4	8.8	3.3	0.4	63	54	51	52
Qpe	T-FR-010	4002022	8	162.541	19	87	49.361	7.872	470	1.1	3.3	7.3	12	16.1	19.9	21.3	20.4	18.6	13	6.2	3	-3.8	-3.2	-0.9	2.4	5.9	9.4	10.9	10.5	8.2	4.6	0.4	-2.2	-1.4	0	3.2	7.2	11	14.6	16.1	15.4	13.4	8.8	3.3	0.4	63	54	51	52
Qpe	T-FR-010	4002031	8	108.779	22	87	49.361	7.872	470	1.1	3.3	7.3	12	16.1	19.9	21.3	20.4	18.6	13	6.2	3	-3.8	-3.2	-0.9	2.4	5.9	9.4	10.9	10.5	8.2	4.6	0.4	-2.2	-1.4	0	3.2	7.2	11	14.6	16.1	15.4	13.4	8.8	3.3	0.4	63	54	51	52
Qpe	T-FR-010	4003039	8	376.463	21	87	49.361	7.872	470	1.1	3.3	7.3	12	16.1	19.9	21.3	20.4	18.6	13	6.2	3	-3.8	-3.2	-0.9	2.4	5.9	9.4	10.9	10.5	8.2	4.6	0.4	-2.2	-1.4	0	3.2	7.2	11	14.6	16.1	15.4	13.4	8.8	3.3	0.4	63	54	51	52
Qpe	T-FR-010	4003045	8	386.393	20	87	49.361	7.872	470	1.1	3.3	7.3	12	16.1	19.9	21.3	20.4	18.6	13	6.2	3	-3.8	-3.2	-0.9	2.4	5.9	9.4	10.9	10.5	8.2	4.6	0.4	-2.2	-1.4	0	3.2	7.2	11	14.6	16.1	15.4	13.4	8.8	3.3	0.4	63	54	51	52
Qpe	T-FR-010	4003046	8	330.807	23	87	49.361	7.872	470	1.1	3.3	7.3	12	16.1	19.9	21.3	20.4	18.6	13	6.2	3	-3.8	-3.2	-0.9	2.4	5.9	9.4	10.9	10.5	8.2	4.6	0.4	-2.2	-1.4	0	3.2	7.2	11	14.6	16.1	15.4	13.4	8.8	3.3	0.4	63	54	51	52
Qpe	T-FR-010	4003050	8	130.909	11	87	49.361	7.872	470	1.1	3.3	7.3	12	16.1	19.9	21.3	20.4	18.6	13	6.2	3	-3.8	-3.2	-0.9	2.4	5.9	9.4	10.9	10.5	8.2	4.6	0.4	-2.2	-1.4	0	3.2	7.2	11	14.6	16.1	15.4	13.4	8.8	3.3	0.4	63	54	51	52
Qpe	T-FR-010	4004055	8	196.776	23	87	49.361	7.872	470	1.1	3.3	7.3	12	16.1	19.9	21.3	20.4	18.6	13	6.2	3	-3.8	-3.2	-0.9	2.4	5.9	9.4	10.9	10.5	8.2	4.6	0.4	-2.2	-1.4	0	3.2	7.2	11	14.6	16.1	15.4	13.4	8.8	3.3	0.4	63	54	51	52
Qpe	T-FR-010	4004062	8	348.065	24	87	49.361	7.872	470	1.1	3.3	7.3	12	16.1	19.9	21.3	20.4	18.6	13	6.2	3	-3.8	-3.2	-0.9	2.4	5.9	9.4	10.9	10.5	8.2	4.6	0.4	-2.2	-1.4	0	3.2	7.2	11	14.6	16.1	15.4	13.4	8.8	3.3	0.4	63	54	51	52
Qpe	T-FR-010	4004063	8	310.962	19	87	49.361	7.872	470	1.1	3.3	7.3	12	16.1	19.9	21.3	20.4	18.6	13	6.2	3	-3.8	-3.2	-0.9	2.4	5.9	9.4	10.9	10.5	8.2	4.6	0.4	-2.2	-1.4	0	3.2	7.2	11	14.6	16.1	15.4	13.4	8.8	3.3	0.4	63	54	51	52
Qpe	T-FR-010	4004067	8	254.675	18	87	49.361	7.872	470	1.1	3.3	7.3	12	16.1	19.9	21.3	20.4	18.6	13	6.2	3	-3.8	-3.2	-0.9	2.4	5.9	9.4	10.9	10.5	8.2	4.6	0.4	-2.2	-1.4	0	3.2	7.2	11	14.6	16.1	15.4	13.4	8.8	3.3	0.4	63	54	51	52
Qpe	T-FR-010	4005070	8	121.879	20	87	49.361	7.872	470	1.1	3.3	7.3	12	16.1	19.9	21.3	20.4	18.6	13	6.2	3	-3.8	-3.2	-0.9	2.4	5.9	9.4	10.9	10.5	8.2	4.6	0.4	-2.2	-1.4	0	3.2	7.2	11	14.6	16.1	15.4	13.4	8.8	3.3	0.4	63	54	51	52
Qpe	T-FR-010	4005074	8	197.908	17	87	49.361	7.872	470	1.1	3.3	7.3	12	16.1	19.9	21.3	20.4	18.6	13	6.2	3	-3.8	-3.2	-0.9	2.4	5.9	9.4	10.9	10.5	8.2	4.6	0.4	-2.2	-1.4	0	3.2	7.2	11	14.6	16.1	15.4	13.4	8.8	3.3	0.4	63	54	51	52
Qpe	T-FR-010	4005080	8	137.695	15	87	49.361	7.872	470	1.1	3.3	7.3	12	16.1	19.9	21.3	20.4	18.6	13	6.2	3	-3.8	-3.2	-0.9	2.4	5.9	9.4	10.9	10.5	8.2	4.6	0.4	-2.2	-1.4	0	3.2	7.2	11	14.6	16.1	15.4	13.4	8.8	3.3	0.4	63	54	51	52
Qpe	T-FR-010	4005082	8	201.114	15	87	49.361	7.872	470	1.1	3.3	7.3	12	16.1	19.9	21.3	20.4	18.6	13	6.2	3	-3.8	-3.2	-0.9	2.4	5.9	9.4	10.9	10.5	8.2	4.6	0.4	-2.2	-1.4	0	3.2	7.2	11	14.6	16.1	15.4	13.4	8.8	3.3	0.4	63	54	51	52
Qpe	T-FR-011	2001006	8	279.928	23	1	51.7942	-2.4895	90.6667	6.4	6.6	8.9	12.2	15.4	18.9	20.4	19.9	17.5	13.9	9.3	7.3	1.1	1	2	4.4	7.1	10.3	11.8	11.6	9.5	7.1	3.4	1.9	3.8	3.8	5.5	8.3	11.3	14.6	16.1	15.7	13.5	10.5	6.4	4.6	81	56	64	54
Qpe	T-FR-011	2002012	8	297.741	18	1	51.7942	-2.4895	90.6667	6.4	6.6	8.9	12.2	15.4	18.9	20.4	19.9	17.5	13.9	9.3	7.3	1.1	1	2	4.4	7.1	10.3	11.8	11.6	9.5	7.1	3.4	1.9	3.8	3.8	5.5	8.3	11.3	14.6	16.1	15.7	13.5	10.5	6.4	4.6	81	56	64	54
Qpe	T-FR-011	2003018	8	245.87	18	1	51.7942	-2.4895	90.6667	6.4	6.6	8.9	12.2	15.4	18.9	20.4	19.9	17.5	13.9	9.3	7.3	1.1	1	2	4.4	7.1	10.3	11.8	11.6	9.5	7.1	3.4	1.9	3.8	3.8	5.5	8.3	11.3	14.6	16.1	15.7	13.5	10.5	6.4	4.6	81	56	64	54
Qpe	T-FR-011	2005024	8	245.368	19	1	51.7942	-2.4895	90.6667	6.4	6.6	8.9	12.2	15.4	18.9	20.4	19.9	17.5	13.9	9.3	7.3	1.1	1	2	4.4	7.1	10.3	11.8	11.6	9.5	7.1	3.4	1.9	3.8	3.8	5.5	8.3	11.3	14.6	16.1	15.7	13.5	10.5	6.4	4.6	81	56	64	54
Qpe	T-FR-011	2006030	8	305.646	16	1	51.7942	-2.4895	90.6667	6.4	6.6	8.9	12.2	15.4	18.9	20.4	19.9	17.5	13.9	9.3	7.3	1.1	1	2	4.4	7.1	10.3	11.8	11.6	9.5	7.1	3.4	1.9	3.8	3.8	5.5	8.3	11.3	14.6	16.1	15.7	13.5	10.5	6.4	4.6	81	56	64	54
Qpe	T-FR-011	2007038	8	263.544	19	1	51.7942	-2.4895	90.6667	6.4	6.6	8.9	12.2	15.4	18.9	20.4	19.9	17.5	13.9	9.3	7.3	1.1	1	2	4.4	7.1	10.3	11.8	11.6	9.5	7.1	3.4	1.9	3.8	3.8	5.5	8.3	11.3	14.6	16.1	15.7	13.5	10.5	6.4	4.6	81	56	64	54
Qpe	T-FR-011	2008044	8	261.05	20	1	51.7942	-2.4895	90.6667	6.4	6.6	8.9	12.2	15.4	18.9	20.4	19.9	17.5	13.9	9.3	7.3	1.1	1	2	4.4	7.1	10.3	11.8	11.6	9.5	7.1	3.4	1.9	3.8	3.8	5.5	8.3	11.3	14.6	16.1	15.7	13.5	10.5	6.4	4.6	81	56	64	54
Qpe	T-FR-011	2009049	8	287.429	21	1	51.7942	-2.4895	90.6667	6.4	6.6	8.9	12.2	15.4	18.9	20.4	19.9	17.5	13.9	9.3	7.3	1.1	1	2	4.4	7.1	10.3	11.8	11.6	9.5	7.1	3.4	1.9	3.8	3.8	5.5	8.3	11.3	14.6	16.1	15.7	13.5	10.5	6.4	4.6	81	56	64	54
Qpe	T-FR-011	2010055	8	238.85	20	1	51.7942	-2.4895	90.6667	6.4	6.6	8.9	12.2	15.4	18.9	20.4	19.9	17.5	13.9	9.3	7.3	1.1	1	2	4.4	7.1	10.3	11.8	11.6	9.5	7.1	3.4	1.9	3.8	3.8	5.5	8.3	11.3	14.6	16.1	15.7	13.5	10.5	6.4	4.6	81	56	64	54
Qpe	T-FR-011	4002022	8	344.064	20	1	51.7942	-2.4895	90.6667	6.4	6.6	8.9	12.2	15.4	18.9	20.4	19.9	17.5	13.9	9.3	7.3	1.1	1	2	4.4	7.1	10.3	11.8	11.6	9.5	7.1	3.4	1.9	3.8	3.8	5.5	8.3	11.3	14.6	16.1	15.7	13.5	10.5	6.4	4.6	81	56	64	54
Qpe	T-FR-011	4002023	8	271.594	19	1	51.7942	-2.4895	90.6667	6.4	6.6	8.9	12.2	15.4	18.9	20.4	19.9	17.5	13.9	9.3	7.3	1.1	1	2	4.4	7.1	10.3	11.8	11.6	9.5	7.1	3.4	1.9	3.8	3.8	5.5	8.3	11.3	14.6	16.1	15.7	13.5	10.5	6.4	4.6	81	56	64	54
Qpe	T-FR-011	4002029	8	257.116	21	1	51.7942	-2.4895	90.6667	6.4	6.6	8.9	12.2	15.4	18.9	20.4	19.9	17.5	13.9	9.3	7.3	1.1	1	2	4.4	7.1	10.3	11.8	11.6	9.5	7.1	3.4	1.9	3.8	3.8	5.5	8.3	11.3	14.6	16.1	15.7	13.5	10.5	6.4	4.6	81	56	64	54
Qpe	T-FR-011	4002034	8	286.195	19	1	51.7942	-2.4895	90.6667	6.4	6.6	8.9	12.2	15.4	18.9	20.4	19.9	17.5	13.9	9.3	7.3	1.1	1	2	4.4	7.1	10.3	11.8	11.6	9.5	7.1	3.4	1.9	3.8	3.8	5.5	8.3	11.3	14.6	16.1	15.7	13.5	10.5	6.4	4.6	81	56	64	54
Qpe	T-FR-011	4003041	8	268.973	21	1	51.7942	-2.4895	90.6667	6.4	6.6	8.9	12.2	15.4	18.9	20.4	19.9	17.5	13.9	9.3	7.3	1.1	1	2	4.4	7.1	10.3	11.8	11.6	9.5	7.1	3.4	1.9	3.8	3.8	5.5	8.3	11.3	14.6	16.1	15.7	13.5	10.5	6.4	4.6	81	56	64	54
Qpe	T-FR-011	4003046	8	248.586	10	1	51.7942	-2.4895	90.6667	6.4	6.6	8.9	12.2	15.4	18.9	20.4	19.9	17.5	13.9	9.3	7.3	1.1	1	2	4.4	7.1	10.3	11.8	11.6	9.5	7.1	3.4	1.9	3.8	3.8	5.5	8.3	11.3	14.6	16.1	15.7	13.5	10.5	6.4	4.6	81	56	64	54
Qpe	T-FR-011	4003050	8	253.245	21	1	51.7942	-2.4895	90.6667	6.4	6.6	8.9	12.2	15.4	18.9	20.4	19.9	17.5	13.9	9.3	7.3	1.1	1	2	4.4	7.1	10.3	11.8	11.6	9.5	7.1	3.4	1.9	3.8	3.8	5.5	8.3	11.3	14.6	16.1	15.7	13.5	10.5	6.4	4.6	81	56	64	54
Qpe	T-FR-011	4003052	8	289.317	18	1	51.7942	-2.4895	90.6667	6.4	6.6	8.9	12.2	15.4	18.9	20.4	19.9	17.5	13.9	9.3	7.3	1.1	1	2	4.4	7.1	10.3	11.8	11.6	9.5	7.1	3.4	1.9	3.8	3.8	5.5	8.3	11.3	14.6	16.1	15.7	13.5	10.5	6.4	4.6	81	56	64	54
Qpe	T-FR-011	4004059	8	294.13	22	1	51.7942	-2.4895	90.6667	6.4	6.6	8.9	12.2	15.4	18.9	20.4	19.9	17.5	13.9	9.3	7.3	1.1	1	2	4.4	7.1	10.3	11.8	11.6	9.5	7.1	3.4	1.9	3.8	3.8	5.5	8.3	11.3	14.6	16.1	15.7	13.5	10.5	6.4	4.6	81	56	64	54
Qpe	T-FR-011	4004063	8	261.55	20	1	51.7942	-2.4895	90.6667	6.4	6.6	8.9	12.2	15.4	18.9	20.4	19.9	17.5	13.9	9.3	7.3	1.1	1	2	4.4	7.1	10.3	11.8	11.6	9.5	7.1	3.4	1.9	3.8	3.8	5.5	8.3	11.3	14.6	16.1	15.7	13.5	10.5	6.4	4.6	81	56	64	54
Qpe	T-FR-011	4004069	8	266.516	23	1	51.7942	-2.4895	90.6667	6.4	6.6	8.9	12.2	15.4	18.9	20.4	19.9	17.5	13.9	9.3	7.3	1.1	1	2	4.4	7.1	10.3	11.8	11.6	9.5	7.1	3.4	1.9	3.8	3.8	5.5	8.3	11.3	14.6	16.1	15.7	13.5	10.5	6.4	4.6	81	56	64	54
Qpe	T-FR-011	4004072	8	304.107	24	1	51.7942	-2.4895	90.6667	6.4	6.6	8.9	12.2	15.4	18.9	20.4	19.9	17.5	13.9	9.3	7.3	1.1	1	2	4.4	7.1	10.3	11.8	11.6	9.5	7.1	3.4	1.9	3.8	3.8	5.5	8.3	11.3	14.6	16.1	15.7	13.5	10.5	6.4	4.6	81	56	64	54
Qpe	T-FR-011	4005080	8	316.027	21	1	51.7942	-2.4895	90.6667	6.4	6.6	8.9	12.2	15.4	18.9	20.4	19.9	17.5	13.9	9.3	7.3	1.1	1	2	4.4	7.1	10.3	11.8	11.6	9.5	7.1	3.4	1.9	3.8	3.8	5.5	8.3	11.3	14.6	16.1	15.7	13.5	10.5	6.4	4.6	81	56	64	54
Qpe	T-FR-011	4005084	8	295.143	22	1	51.7942	-2.4895	90.6667	6.4	6.6	8.9	12.2	15.4	18.9	20.4	19.9	17.5	13.9	9.3	7.3	1.1	1	2	4.4	7.1	10.3	11.8	11.6	9.5	7.1	3.4	1.9	3.8	3.8	5.5	8.3	11.3	14.6	16.1	15.7	13.5	10.5	6.4	4.6	81	56	64	54
Qpe	T-FR-011	4005091	8	292.732	24	1	51.7942	-2.4895	90.6667	6.4	6.6	8.9	12.2	15.4	18.9	20.4	19.9	17.5	13.9	9.3	7.3	1.1	1	2	4.4	7.1	10.3	11.8	11.6	9.5	7.1	3.4	1.9	3.8	3.8	5.5	8.3	11.3	14.6	16.1	15.7	13.5	10.5	6.4	4.6	81	56	64	54
Qpe	T-FR-011	4005094	8	304.357	22	1	51.7942	-2.4895	90.6667	6.4	6.6	8.9	12.2	15.4	18.9	20.4	19.9	17.5	13.9	9.3	7.3	1.1	1	2	4.4	7.1	10.3	11.8	11.6	9.5	7.1	3.4	1.9	3.8	3.8	5.5	8.3	11.3	14.6	16.1	15.7	13.5	10.5	6.4	4.6	81	56	64	54
Qpe	T-FR-011	2001002	8	315.682	22	21	46.4607	2.89067	270	6.1	7.8	12	15.1	18.5	22.2	24.7	24.1	21.7	16.3	10.3	6.4	-1	-0.3	1.4	4.2	7.3	10.6	12.3	12	10.2	6.1	2.8	-0.2	2.6	3.7	6.7	9.6	12.9	16.4	18.5	18.1	15.9	11.2	6.6	3.1	58	58	56	55
Qpe	T-FR-011	2002009	8	267.183	20	21	46.4607	2.89067	270	6.1	7.8	12	15.1	18.5	22.2	24.7	24.1	21.7	16.3	10.3	6.4	-1	-0.3	1.4	4.2	7.3	10.6	12.3	12	10.2	6.1	2.8	-0.2	2.6	3.7	6.7	9.6	12.9	16.4	18.5	18.1	15.9	11.2	6.6	3.1	58	58	56	55
Qpe	T-FR-011	2003015	8	322.603	21	21	46.4607	2.89067	270	6.1	7.8	12	15.1	18.5	22.2	24.7	24.1	21.7	16.3	10.3	6.4	-1	-0.3	1.4	4.2	7.3	10.6	12.3	12	10.2	6.1	2.8	-0.2	2.6	3.7	6.7	9.6	12.9	16.4	18.5	18.1	15.9	11.2	6.6	3.1	58	58	56	55
Qpe	T-FR-011	2004020	8	259.842	19	21	46.4607	2.89067	270	6.1	7.8	12	15.1	18.5	22.2	24.7	24.1	21.7	16.3	10.3	6.4	-1	-0.3	1.4	4.2	7.3	10.6	12.3	12	10.2	6.1	2.8	-0.2	2.6	3.7	6.7	9.6	12.9	16.4	18.5	18.1	15.9	11.2	6.6	3.1	58	58	56	55
Qpe	T-FR-011	2005027	8	243.048	14	21	46.4607	2.89067	270	6.1	7.8	12	15.1	18.5	22.2	24.7	24.1	21.7	16.3	10.3	6.4	-1	-0.3	1.4	4.2	7.3	10.6	12.3	12	10.2	6.1	2.8	-0.2	2.6	3.7	6.7	9.6	12.9	16.4	18.5	18.1	15.9	11.2	6.6	3.1	58	58	56	55
Qpe	T-FR-011	2006031	8	304.333	20	21	46.4607	2.89067	270	6.1	7.8	12	15.1	18.5	22.2	24.7	24.1	21.7	16.3	10.3	6.4	-1	-0.3	1.4	4.2	7.3	10.6	12.3	12	10.2	6.1	2.8	-0.2	2.6	3.7	6.7	9.6	12.9	16.4	18.5	18.1	15.9	11.2	6.6	3.1	58	58	56	55
Qpe	T-FR-011	2008045	8	307.183	20	21	46.4607	2.89067	270	6.1	7.8	12	15.1	18.5	22.2	24.7	24.1	21.7	16.3	10.3	6.4	-1	-0.3	1.4	4.2	7.3	10.6	12.3	12	10.2	6.1	2.8	-0.2	2.6	3.7	6.7	9.6	12.9	16.4	18.5	18.1	15.9	11.2	6.6	3.1	58	58	56	55
Qpe	T-FR-011	2009047	8	259.353	17	21	46.4607	2.89067	270	6.1	7.8	12	15.1	18.5	22.2	24.7	24.1	21.7	16.3	10.3	6.4	-1	-0.3	1.4	4.2	7.3	10.6	12.3	12	10.2	6.1	2.8	-0.2	2.6	3.7	6.7	9.6	12.9	16.4	18.5	18.1	15.9	11.2	6.6	3.1	58	58	56	55
Qpe	T-FR-011	2010055	8	252.667	19	21	46.4607	2.89067	270	6.1	7.8	12	15.1	18.5	22.2	24.7	24.1	21.7	16.3	10.3	6.4	-1	-0.3	1.4	4.2	7.3	10.6	12.3	12	10.2	6.1	2.8	-0.2	2.6	3.7	6.7	9.6	12.9	16.4	18.5	18.1	15.9	11.2	6.6	3.1	58	58	56	55
Qpe	T-FR-011	4002020	8	294.786	18	21	46.4607	2.89067	270	6.1	7.8	12	15.1	18.5	22.2	24.7	24.1	21.7	16.3	10.3	6.4	-1	-0.3	1.4	4.2	7.3	10.6	12.3	12	10.2	6.1	2.8	-0.2	2.6	3.7	6.7	9.6	12.9	16.4	18.5	18.1	15.9	11.2	6.6	3.1	58	58	56	55
Qpe	T-FR-011	4002023	8	293.5	22	21	46.4607	2.89067	270	6.1	7.8	12	15.1	18.5	22.2	24.7	24.1	21.7	16.3	10.3	6.4	-1	-0.3	1.4	4.2	7.3	10.6	12.3	12	10.2	6.1	2.8	-0.2	2.6	3.7	6.7	9.6	12.9	16.4	18.5	18.1	15.9	11.2	6.6	3.1	58	58	56	55
Qpe	T-FR-011	4002029	8	281.842	19	21	46.4607	2.89067	270	6.1	7.8	12	15.1	18.5	22.2	24.7	24.1	21.7	16.3	10.3	6.4	-1	-0.3	1.4	4.2	7.3	10.6	12.3	12	10.2	6.1	2.8	-0.2	2.6	3.7	6.7	9.6	12.9	16.4	18.5	18.1	15.9	11.2	6.6	3.1	58	58	56	55
Qpe	T-FR-011	4003049	8	262.586	19	21	46.4607	2.89067	270	6.1	7.8	12	15.1	18.5	22.2	24.7	24.1	21.7	16.3	10.3	6.4	-1	-0.3	1.4	4.2	7.3	10.6	12.3	12	10.2	6.1	2.8	-0.2	2.6	3.7	6.7	9.6	12.9	16.4	18.5	18.1	15.9	11.2	6.6	3.1	58	58	56	55
Qpe	T-FR-011	4003054	8	270.841	18	21	46.4607	2.89067	270	6.1	7.8	12	15.1	18.5	22.2	24.7	24.1	21.7	16.3	10.3	6.4	-1	-0.3	1.4	4.2	7.3	10.6	12.3	12	10.2	6.1	2.8	-0.2	2.6	3.7	6.7	9.6	12.9	16.4	18.5	18.1	15.9	11.2	6.6	3.1	58	58	56	55
Qpe	T-FR-011	4003056	8	247.491	16	21	46.4607	2.89067	270	6.1	7.8	12	15.1	18.5	22.2	24.7	24.1	21.7	16.3	10.3	6.4	-1	-0.3	1.4	4.2	7.3	10.6	12.3	12	10.2	6.1	2.8	-0.2	2.6	3.7	6.7	9.6	12.9	16.4	18.5	18.1	15.9	11.2	6.6	3.1	58	58	56	55
Qpe	T-FR-011	4004070	8	277.625	16	21	46.4607	2.89067	270	6.1	7.8	12	15.1	18.5	22.2	24.7	24.1	21.7	16.3	10.3	6.4	-1	-0.3	1.4	4.2	7.3	10.6	12.3	12	10.2	6.1	2.8	-0.2	2.6	3.7	6.7	9.6	12.9	16.4	18.5	18.1	15.9	11.2	6.6	3.1	58	58	56	55
Qpe	T-FR-011	4004074	8	313.088	21	21	46.4607	2.89067	270	6.1	7.8	12	15.1	18.5	22.2	24.7	24.1	21.7	16.3	10.3	6.4	-1	-0.3	1.4	4.2	7.3	10.6	12.3	12	10.2	6.1	2.8	-0.2	2.6	3.7	6.7	9.6	12.9	16.4	18.5	18.1	15.9	11.2	6.6	3.1	58	58	56	55
Qpe	T-FR-011	4004076	8	280.935	22	21	46.4607	2.89067	270	6.1	7.8	12	15.1	18.5	22.2	24.7	24.1	21.7	16.3	10.3	6.4	-1	-0.3	1.4	4.2	7.3	10.6	12.3	12	10.2	6.1	2.8	-0.2	2.6	3.7	6.7	9.6	12.9	16.4	18.5	18.1	15.9	11.2	6.6	3.1	58	58	56	55
Qpe	T-FR-011	4005079	8	306.048	18	21	46.4607	2.89067	270	6.1	7.8	12	15.1	18.5	22.2	24.7	24.1	21.7	16.3	10.3	6.4	-1	-0.3	1.4	4.2	7.3	10.6	12.3	12	10.2	6.1	2.8	-0.2	2.6	3.7	6.7	9.6	12.9	16.4	18.5	18.1	15.9	11.2	6.6	3.1	58	58	56	55
Qpe	T-FR-011	4005095	8	245.381	21	21	46.4607	2.89067	270	6.1	7.8	12	15.1	18.5	22.2	24.7	24.1	21.7	16.3	10.3	6.4	-1	-0.3	1.4	4.2	7.3	10.6	12.3	12	10.2	6.1	2.8	-0.2	2.6	3.7	6.7	9.6	12.9	16.4	18.5	18.1	15.9	11.2	6.6	3.1	58	58	56	55
Qpe	T-FR-011	4005096	8	298.088	21	21	46.4607	2.89067	270	6.1	7.8	12	15.1	18.5	22.2	24.7	24.1	21.7	16.3	10.3	6.4	-1	-0.3	1.4	4.2	7.3	10.6	12.3	12	10.2	6.1	2.8	-0.2	2.6	3.7	6.7	9.6	12.9	16.4	18.5	18.1	15.9	11.2	6.6	3.1	58	58	56	55
Qpe	T-FR-011	2001003	8	261.035	19	26	51.948	-2.45	70	6.5	6.8	9.1	12.2	15.5	18.9	20.3	19.9	17.6	14.2	9.5	7.4	1.2	1.1	2.2	4.5	7.2	10.3	11.8	11.6	9.6	7.3	3.6	2.1	3.9	4	5.6	8.3	11.3	14.6	16.1	15.7	13.6	10.7	6.5	4.8	69	48	55	49
Qpe	T-FR-011	2002012	8	313.762	14	26	51.948	-2.45	70	6.5	6.8	9.1	12.2	15.5	18.9	20.3	19.9	17.6	14.2	9.5	7.4	1.2	1.1	2.2	4.5	7.2	10.3	11.8	11.6	9.6	7.3	3.6	2.1	3.9	4	5.6	8.3	11.3	14.6	16.1	15.7	13.6	10.7	6.5	4.8	69	48	55	49
Qpe	T-FR-011	2003013	8	285.667	13	26	51.948	-2.45	70	6.5	6.8	9.1	12.2	15.5	18.9	20.3	19.9	17.6	14.2	9.5	7.4	1.2	1.1	2.2	4.5	7.2	10.3	11.8	11.6	9.6	7.3	3.6	2.1	3.9	4	5.6	8.3	11.3	14.6	16.1	15.7	13.6	10.7	6.5	4.8	69	48	55	49
Qpe	T-FR-011	2004021	8	228.5	12	26	51.948	-2.45	70	6.5	6.8	9.1	12.2	15.5	18.9	20.3	19.9	17.6	14.2	9.5	7.4	1.2	1.1	2.2	4.5	7.2	10.3	11.8	11.6	9.6	7.3	3.6	2.1	3.9	4	5.6	8.3	11.3	14.6	16.1	15.7	13.6	10.7	6.5	4.8	69	48	55	49
Qpe	T-FR-011	2005025	8	251.133	15	26	51.948	-2.45	70	6.5	6.8	9.1	12.2	15.5	18.9	20.3	19.9	17.6	14.2	9.5	7.4	1.2	1.1	2.2	4.5	7.2	10.3	11.8	11.6	9.6	7.3	3.6	2.1	3.9	4	5.6	8.3	11.3	14.6	16.1	15.7	13.6	10.7	6.5	4.8	69	48	55	49
Qpe	T-FR-011	2006033	8	242.4	20	26	51.948	-2.45	70	6.5	6.8	9.1	12.2	15.5	18.9	20.3	19.9	17.6	14.2	9.5	7.4	1.2	1.1	2.2	4.5	7.2	10.3	11.8	11.6	9.6	7.3	3.6	2.1	3.9	4	5.6	8.3	11.3	14.6	16.1	15.7	13.6	10.7	6.5	4.8	69	48	55	49
Qpe	T-FR-011	2008042	8	285.316	19	26	51.948	-2.45	70	6.5	6.8	9.1	12.2	15.5	18.9	20.3	19.9	17.6	14.2	9.5	7.4	1.2	1.1	2.2	4.5	7.2	10.3	11.8	11.6	9.6	7.3	3.6	2.1	3.9	4	5.6	8.3	11.3	14.6	16.1	15.7	13.6	10.7	6.5	4.8	69	48	55	49
Qpe	T-FR-011	2009049	8	265.229	16	26	51.948	-2.45	70	6.5	6.8	9.1	12.2	15.5	18.9	20.3	19.9	17.6	14.2	9.5	7.4	1.2	1.1	2.2	4.5	7.2	10.3	11.8	11.6	9.6	7.3	3.6	2.1	3.9	4	5.6	8.3	11.3	14.6	16.1	15.7	13.6	10.7	6.5	4.8	69	48	55	49
Qpe	T-FR-011	2010055	8	259.963	9	26	51.948	-2.45	70	6.5	6.8	9.1	12.2	15.5	18.9	20.3	19.9	17.6	14.2	9.5	7.4	1.2	1.1	2.2	4.5	7.2	10.3	11.8	11.6	9.6	7.3	3.6	2.1	3.9	4	5.6	8.3	11.3	14.6	16.1	15.7	13.6	10.7	6.5	4.8	69	48	55	49
Qpe	T-FR-011	4002027	8	291.279	22	26	51.948	-2.45	70	6.5	6.8	9.1	12.2	15.5	18.9	20.3	19.9	17.6	14.2	9.5	7.4	1.2	1.1	2.2	4.5	7.2	10.3	11.8	11.6	9.6	7.3	3.6	2.1	3.9	4	5.6	8.3	11.3	14.6	16.1	15.7	13.6	10.7	6.5	4.8	69	48	55	49
Qpe	T-FR-011	4002038	8	275.81	15	26	51.948	-2.45	70	6.5	6.8	9.1	12.2	15.5	18.9	20.3	19.9	17.6	14.2	9.5	7.4	1.2	1.1	2.2	4.5	7.2	10.3	11.8	11.6	9.6	7.3	3.6	2.1	3.9	4	5.6	8.3	11.3	14.6	16.1	15.7	13.6	10.7	6.5	4.8	69	48	55	49
Qpe	T-FR-011	4003041	8	279.463	21	26	51.948	-2.45	70	6.5	6.8	9.1	12.2	15.5	18.9	20.3	19.9	17.6	14.2	9.5	7.4	1.2	1.1	2.2	4.5	7.2	10.3	11.8	11.6	9.6	7.3	3.6	2.1	3.9	4	5.6	8.3	11.3	14.6	16.1	15.7	13.6	10.7	6.5	4.8	69	48	55	49
Qpe	T-FR-011	4003047	8	273.248	23	26	51.948	-2.45	70	6.5	6.8	9.1	12.2	15.5	18.9	20.3	19.9	17.6	14.2	9.5	7.4	1.2	1.1	2.2	4.5	7.2	10.3	11.8	11.6	9.6	7.3	3.6	2.1	3.9	4	5.6	8.3	11.3	14.6	16.1	15.7	13.6	10.7	6.5	4.8	69	48	55	49
Qpe	T-FR-011	4004064	8	279.081	23	26	51.948	-2.45	70	6.5	6.8	9.1	12.2	15.5	18.9	20.3	19.9	17.6	14.2	9.5	7.4	1.2	1.1	2.2	4.5	7.2	10.3	11.8	11.6	9.6	7.3	3.6	2.1	3.9	4	5.6	8.3	11.3	14.6	16.1	15.7	13.6	10.7	6.5	4.8	69	48	55	49
Qpe	T-FR-011	4004070	8	305.435	21	26	51.948	-2.45	70	6.5	6.8	9.1	12.2	15.5	18.9	20.3	19.9	17.6	14.2	9.5	7.4	1.2	1.1	2.2	4.5	7.2	10.3	11.8	11.6	9.6	7.3	3.6	2.1	3.9	4	5.6	8.3	11.3	14.6	16.1	15.7	13.6	10.7	6.5	4.8	69	48	55	49
Qpe	T-FR-011	4005089	8	310.238	18	26	51.948	-2.45	70	6.5	6.8	9.1	12.2	15.5	18.9	20.3	19.9	17.6	14.2	9.5	7.4	1.2	1.1	2.2	4.5	7.2	10.3	11.8	11.6	9.6	7.3	3.6	2.1	3.9	4	5.6	8.3	11.3	14.6	16.1	15.7	13.6	10.7	6.5	4.8	69	48	55	49
Qpe	T-FR-011	4005090	8	241.056	18	26	51.948	-2.45	70	6.5	6.8	9.1	12.2	15.5	18.9	20.3	19.9	17.6	14.2	9.5	7.4	1.2	1.1	2.2	4.5	7.2	10.3	11.8	11.6	9.6	7.3	3.6	2.1	3.9	4	5.6	8.3	11.3	14.6	16.1	15.7	13.6	10.7	6.5	4.8	69	48	55	49
Qpe	T-FR-011	4002022	8	257.694	21	260	56.071	9.597	25	2.7	3.3	5.4	9.2	14.7	18	19.3	19.1	15.9	11.6	7.3	4.3	-5.4	-5.4	-2	2.8	7.6	11	12.9	11.7	9.3	5.6	1.1	0.2	-1.3	-1	1.7	6	11.1	14.5	16.1	15.4	12.6	8.6	4.2	2.2	59	41	47	43
Qpe	T-FR-011	4002036	8	231.421	18	260	56.071	9.597	25	2.7	3.3	5.4	9.2	14.7	18	19.3	19.1	15.9	11.6	7.3	4.3	-5.4	-5.4	-2	2.8	7.6	11	12.9	11.7	9.3	5.6	1.1	0.2	-1.3	-1	1.7	6	11.1	14.5	16.1	15.4	12.6	8.6	4.2	2.2	59	41	47	43
Qpe	T-FR-011	4003048	8	220.469	21	260	56.071	9.597	25	2.7	3.3	5.4	9.2	14.7	18	19.3	19.1	15.9	11.6	7.3	4.3	-5.4	-5.4	-2	2.8	7.6	11	12.9	11.7	9.3	5.6	1.1	0.2	-1.3	-1	1.7	6	11.1	14.5	16.1	15.4	12.6	8.6	4.2	2.2	59	41	47	43
Qpe	T-FR-011	4003056	8	223.901	23	260	56.071	9.597	25	2.7	3.3	5.4	9.2	14.7	18	19.3	19.1	15.9	11.6	7.3	4.3	-5.4	-5.4	-2	2.8	7.6	11	12.9	11.7	9.3	5.6	1.1	0.2	-1.3	-1	1.7	6	11.1	14.5	16.1	15.4	12.6	8.6	4.2	2.2	59	41	47	43
Qpe	T-FR-011	4004065	8	217.921	18	260	56.071	9.597	25	2.7	3.3	5.4	9.2	14.7	18	19.3	19.1	15.9	11.6	7.3	4.3	-5.4	-5.4	-2	2.8	7.6	11	12.9	11.7	9.3	5.6	1.1	0.2	-1.3	-1	1.7	6	11.1	14.5	16.1	15.4	12.6	8.6	4.2	2.2	59	41	47	43
Qpe	T-FR-011	4004073	8	245.064	20	260	56.071	9.597	25	2.7	3.3	5.4	9.2	14.7	18	19.3	19.1	15.9	11.6	7.3	4.3	-5.4	-5.4	-2	2.8	7.6	11	12.9	11.7	9.3	5.6	1.1	0.2	-1.3	-1	1.7	6	11.1	14.5	16.1	15.4	12.6	8.6	4.2	2.2	59	41	47	43
Qpe	T-FR-011	4005088	8	234.736	13	260	56.071	9.597	25	2.7	3.3	5.4	9.2	14.7	18	19.3	19.1	15.9	11.6	7.3	4.3	-5.4	-5.4	-2	2.8	7.6	11	12.9	11.7	9.3	5.6	1.1	0.2	-1.3	-1	1.7	6	11.1	14.5	16.1	15.4	12.6	8.6	4.2	2.2	59	41	47	43
Qpe	T-FR-011	4005095	8	308.416	22	260	56.071	9.597	25	2.7	3.3	5.4	9.2	14.7	18	19.3	19.1	15.9	11.6	7.3	4.3	-5.4	-5.4	-2	2.8	7.6	11	12.9	11.7	9.3	5.6	1.1	0.2	-1.3	-1	1.7	6	11.1	14.5	16.1	15.4	12.6	8.6	4.2	2.2	59	41	47	43
Qpe	T-FR-011	4002021	8	256.344	22	277	40.917	31.667	1200	2.1	3.8	8.1	12.7	17.1	20.7	22.8	23	20.4	14.9	10.3	4.2	-4.5	-3.4	-1.1	2.7	6.5	9.2	11.4	11.1	8.7	5	1.6	-2	-1.2	0.2	3.5	7.7	11.8	14.9	17.1	17	14.6	10	6	1.1	87	69	68	67
Qpe	T-FR-011	4002029	8	260.85	21	277	40.917	31.667	1200	2.1	3.8	8.1	12.7	17.1	20.7	22.8	23	20.4	14.9	10.3	4.2	-4.5	-3.4	-1.1	2.7	6.5	9.2	11.4	11.1	8.7	5	1.6	-2	-1.2	0.2	3.5	7.7	11.8	14.9	17.1	17	14.6	10	6	1.1	87	69	68	67
Qpe	T-FR-011	4003050	8	226.175	22	277	40.917	31.667	1200	2.1	3.8	8.1	12.7	17.1	20.7	22.8	23	20.4	14.9	10.3	4.2	-4.5	-3.4	-1.1	2.7	6.5	9.2	11.4	11.1	8.7	5	1.6	-2	-1.2	0.2	3.5	7.7	11.8	14.9	17.1	17	14.6	10	6	1.1	87	69	68	67
Qpe	T-FR-011	4003051	8	250.762	18	277	40.917	31.667	1200	2.1	3.8	8.1	12.7	17.1	20.7	22.8	23	20.4	14.9	10.3	4.2	-4.5	-3.4	-1.1	2.7	6.5	9.2	11.4	11.1	8.7	5	1.6	-2	-1.2	0.2	3.5	7.7	11.8	14.9	17.1	17	14.6	10	6	1.1	87	69	68	67
Qpe	T-FR-011	4004071	8	232.8	20	277	40.917	31.667	1200	2.1	3.8	8.1	12.7	17.1	20.7	22.8	23	20.4	14.9	10.3	4.2	-4.5	-3.4	-1.1	2.7	6.5	9.2	11.4	11.1	8.7	5	1.6	-2	-1.2	0.2	3.5	7.7	11.8	14.9	17.1	17	14.6	10	6	1.1	87	69	68	67
Qpe	T-FR-011	4004076	8	258.55	20	277	40.917	31.667	1200	2.1	3.8	8.1	12.7	17.1	20.7	22.8	23	20.4	14.9	10.3	4.2	-4.5	-3.4	-1.1	2.7	6.5	9.2	11.4	11.1	8.7	5	1.6	-2	-1.2	0.2	3.5	7.7	11.8	14.9	17.1	17	14.6	10	6	1.1	87	69	68	67
Qpe	T-FR-011	4005080	8	217.96	18	277	40.917	31.667	1200	2.1	3.8	8.1	12.7	17.1	20.7	22.8	23	20.4	14.9	10.3	4.2	-4.5	-3.4	-1.1	2.7	6.5	9.2	11.4	11.1	8.7	5	1.6	-2	-1.2	0.2	3.5	7.7	11.8	14.9	17.1	17	14.6	10	6	1.1	87	69	68	67
Qpe	T-FR-011	4005091	8	257.814	10	277	40.917	31.667	1200	2.1	3.8	8.1	12.7	17.1	20.7	22.8	23	20.4	14.9	10.3	4.2	-4.5	-3.4	-1.1	2.7	6.5	9.2	11.4	11.1	8.7	5	1.6	-2	-1.2	0.2	3.5	7.7	11.8	14.9	17.1	17	14.6	10	6	1.1	87	69	68	67
Qpe	T-FR-011	4002020	8	268.1	20	33	51.1827	17.9313	210	-0.2	1.5	6.7	13	18.2	21.7	22.8	22.6	18.6	13.6	6.9	2.1	-5.7	-4.5	-0.9	3	7.4	10.9	12	11.6	8.8	4.7	1	-3.1	-3	-1.5	2.9	8	12.8	16.3	17.4	17.1	13.7	9.1	4	-0.5	31	28	29	37
Qpe	T-FR-011	4002025	8	261.476	21	33	51.1827	17.9313	210	-0.2	1.5	6.7	13	18.2	21.7	22.8	22.6	18.6	13.6	6.9	2.1	-5.7	-4.5	-0.9	3	7.4	10.9	12	11.6	8.8	4.7	1	-3.1	-3	-1.5	2.9	8	12.8	16.3	17.4	17.1	13.7	9.1	4	-0.5	31	28	29	37
Qpe	T-FR-011	4003045	8	257.095	24	33	51.1827	17.9313	210	-0.2	1.5	6.7	13	18.2	21.7	22.8	22.6	18.6	13.6	6.9	2.1	-5.7	-4.5	-0.9	3	7.4	10.9	12	11.6	8.8	4.7	1	-3.1	-3	-1.5	2.9	8	12.8	16.3	17.4	17.1	13.7	9.1	4	-0.5	31	28	29	37
Qpe	T-FR-011	4003051	8	257.383	22	33	51.1827	17.9313	210	-0.2	1.5	6.7	13	18.2	21.7	22.8	22.6	18.6	13.6	6.9	2.1	-5.7	-4.5	-0.9	3	7.4	10.9	12	11.6	8.8	4.7	1	-3.1	-3	-1.5	2.9	8	12.8	16.3	17.4	17.1	13.7	9.1	4	-0.5	31	28	29	37
Qpe	T-FR-011	4004067	8	271.286	23	33	51.1827	17.9313	210	-0.2	1.5	6.7	13	18.2	21.7	22.8	22.6	18.6	13.6	6.9	2.1	-5.7	-4.5	-0.9	3	7.4	10.9	12	11.6	8.8	4.7	1	-3.1	-3	-1.5	2.9	8	12.8	16.3	17.4	17.1	13.7	9.1	4	-0.5	31	28	29	37
Qpe	T-FR-011	4004077	8	272.556	19	33	51.1827	17.9313	210	-0.2	1.5	6.7	13	18.2	21.7	22.8	22.6	18.6	13.6	6.9	2.1	-5.7	-4.5	-0.9	3	7.4	10.9	12	11.6	8.8	4.7	1	-3.1	-3	-1.5	2.9	8	12.8	16.3	17.4	17.1	13.7	9.1	4	-0.5	31	28	29	37
Qpe	T-FR-011	4005079	8	304.391	23	33	51.1827	17.9313	210	-0.2	1.5	6.7	13	18.2	21.7	22.8	22.6	18.6	13.6	6.9	2.1	-5.7	-4.5	-0.9	3	7.4	10.9	12	11.6	8.8	4.7	1	-3.1	-3	-1.5	2.9	8	12.8	16.3	17.4	17.1	13.7	9.1	4	-0.5	31	28	29	37
Qpe	T-FR-011	4005085	8	300.194	14	33	51.1827	17.9313	210	-0.2	1.5	6.7	13	18.2	21.7	22.8	22.6	18.6	13.6	6.9	2.1	-5.7	-4.5	-0.9	3	7.4	10.9	12	11.6	8.8	4.7	1	-3.1	-3	-1.5	2.9	8	12.8	16.3	17.4	17.1	13.7	9.1	4	-0.5	31	28	29	37
Qpe	T-FR-011	1001002	8	311.306	38	4	47.8091	0.390286	156.75	6.2	7.6	11.4	14.8	18.1	21.9	24.1	23.6	20.9	15.8	10.1	6.5	0.1	0.6	2.2	4.7	7.6	10.8	12.6	12.3	10.3	6.8	3.5	0.9	3.1	4.1	6.8	9.8	12.8	16.3	18.3	17.9	15.6	11.3	6.8	3.7	68	61	57	53
Qpe	T-FR-011	1001003	8	316.345	23	4	47.8091	0.390286	156.75	6.2	7.6	11.4	14.8	18.1	21.9	24.1	23.6	20.9	15.8	10.1	6.5	0.1	0.6	2.2	4.7	7.6	10.8	12.6	12.3	10.3	6.8	3.5	0.9	3.1	4.1	6.8	9.8	12.8	16.3	18.3	17.9	15.6	11.3	6.8	3.7	68	61	57	53
Qpe	T-FR-011	1001004	8	307.116	24	4	47.8091	0.390286	156.75	6.2	7.6	11.4	14.8	18.1	21.9	24.1	23.6	20.9	15.8	10.1	6.5	0.1	0.6	2.2	4.7	7.6	10.8	12.6	12.3	10.3	6.8	3.5	0.9	3.1	4.1	6.8	9.8	12.8	16.3	18.3	17.9	15.6	11.3	6.8	3.7	68	61	57	53
Qpe	T-FR-011	1002007	8	273.731	23	4	47.8091	0.390286	156.75	6.2	7.6	11.4	14.8	18.1	21.9	24.1	23.6	20.9	15.8	10.1	6.5	0.1	0.6	2.2	4.7	7.6	10.8	12.6	12.3	10.3	6.8	3.5	0.9	3.1	4.1	6.8	9.8	12.8	16.3	18.3	17.9	15.6	11.3	6.8	3.7	68	61	57	53
Qpe	T-FR-011	1002009	8	279.681	22	4	47.8091	0.390286	156.75	6.2	7.6	11.4	14.8	18.1	21.9	24.1	23.6	20.9	15.8	10.1	6.5	0.1	0.6	2.2	4.7	7.6	10.8	12.6	12.3	10.3	6.8	3.5	0.9	3.1	4.1	6.8	9.8	12.8	16.3	18.3	17.9	15.6	11.3	6.8	3.7	68	61	57	53
Qpe	T-FR-011	1002011	8	265.121	23	4	47.8091	0.390286	156.75	6.2	7.6	11.4	14.8	18.1	21.9	24.1	23.6	20.9	15.8	10.1	6.5	0.1	0.6	2.2	4.7	7.6	10.8	12.6	12.3	10.3	6.8	3.5	0.9	3.1	4.1	6.8	9.8	12.8	16.3	18.3	17.9	15.6	11.3	6.8	3.7	68	61	57	53
Qpe	T-FR-011	1002012	8	337.82	23	4	47.8091	0.390286	156.75	6.2	7.6	11.4	14.8	18.1	21.9	24.1	23.6	20.9	15.8	10.1	6.5	0.1	0.6	2.2	4.7	7.6	10.8	12.6	12.3	10.3	6.8	3.5	0.9	3.1	4.1	6.8	9.8	12.8	16.3	18.3	17.9	15.6	11.3	6.8	3.7	68	61	57	53
Qpe	T-FR-011	1003013	8	241.692	42	4	47.8091	0.390286	156.75	6.2	7.6	11.4	14.8	18.1	21.9	24.1	23.6	20.9	15.8	10.1	6.5	0.1	0.6	2.2	4.7	7.6	10.8	12.6	12.3	10.3	6.8	3.5	0.9	3.1	4.1	6.8	9.8	12.8	16.3	18.3	17.9	15.6	11.3	6.8	3.7	68	61	57	53
Qpe	T-FR-011	1003014	8	315.839	44	4	47.8091	0.390286	156.75	6.2	7.6	11.4	14.8	18.1	21.9	24.1	23.6	20.9	15.8	10.1	6.5	0.1	0.6	2.2	4.7	7.6	10.8	12.6	12.3	10.3	6.8	3.5	0.9	3.1	4.1	6.8	9.8	12.8	16.3	18.3	17.9	15.6	11.3	6.8	3.7	68	61	57	53
Qpe	T-FR-011	1003018	8	284.935	22	4	47.8091	0.390286	156.75	6.2	7.6	11.4	14.8	18.1	21.9	24.1	23.6	20.9	15.8	10.1	6.5	0.1	0.6	2.2	4.7	7.6	10.8	12.6	12.3	10.3	6.8	3.5	0.9	3.1	4.1	6.8	9.8	12.8	16.3	18.3	17.9	15.6	11.3	6.8	3.7	68	61	57	53
Qpe	T-FR-011	1004019	8	270.124	22	4	47.8091	0.390286	156.75	6.2	7.6	11.4	14.8	18.1	21.9	24.1	23.6	20.9	15.8	10.1	6.5	0.1	0.6	2.2	4.7	7.6	10.8	12.6	12.3	10.3	6.8	3.5	0.9	3.1	4.1	6.8	9.8	12.8	16.3	18.3	17.9	15.6	11.3	6.8	3.7	68	61	57	53
Qpe	T-FR-011	1004021	8	317.997	35	4	47.8091	0.390286	156.75	6.2	7.6	11.4	14.8	18.1	21.9	24.1	23.6	20.9	15.8	10.1	6.5	0.1	0.6	2.2	4.7	7.6	10.8	12.6	12.3	10.3	6.8	3.5	0.9	3.1	4.1	6.8	9.8	12.8	16.3	18.3	17.9	15.6	11.3	6.8	3.7	68	61	57	53
Qpe	T-FR-011	1004024	8	298.163	22	4	47.8091	0.390286	156.75	6.2	7.6	11.4	14.8	18.1	21.9	24.1	23.6	20.9	15.8	10.1	6.5	0.1	0.6	2.2	4.7	7.6	10.8	12.6	12.3	10.3	6.8	3.5	0.9	3.1	4.1	6.8	9.8	12.8	16.3	18.3	17.9	15.6	11.3	6.8	3.7	68	61	57	53
Qpe	T-FR-011	1005026	8	250.36	20	4	47.8091	0.390286	156.75	6.2	7.6	11.4	14.8	18.1	21.9	24.1	23.6	20.9	15.8	10.1	6.5	0.1	0.6	2.2	4.7	7.6	10.8	12.6	12.3	10.3	6.8	3.5	0.9	3.1	4.1	6.8	9.8	12.8	16.3	18.3	17.9	15.6	11.3	6.8	3.7	68	61	57	53
Qpe	T-FR-011	1005027	8	225.504	19	4	47.8091	0.390286	156.75	6.2	7.6	11.4	14.8	18.1	21.9	24.1	23.6	20.9	15.8	10.1	6.5	0.1	0.6	2.2	4.7	7.6	10.8	12.6	12.3	10.3	6.8	3.5	0.9	3.1	4.1	6.8	9.8	12.8	16.3	18.3	17.9	15.6	11.3	6.8	3.7	68	61	57	53
Qpe	T-FR-011	1005028	8	227.013	20	4	47.8091	0.390286	156.75	6.2	7.6	11.4	14.8	18.1	21.9	24.1	23.6	20.9	15.8	10.1	6.5	0.1	0.6	2.2	4.7	7.6	10.8	12.6	12.3	10.3	6.8	3.5	0.9	3.1	4.1	6.8	9.8	12.8	16.3	18.3	17.9	15.6	11.3	6.8	3.7	68	61	57	53
Qpe	T-FR-011	1005030	8	278.659	18	4	47.8091	0.390286	156.75	6.2	7.6	11.4	14.8	18.1	21.9	24.1	23.6	20.9	15.8	10.1	6.5	0.1	0.6	2.2	4.7	7.6	10.8	12.6	12.3	10.3	6.8	3.5	0.9	3.1	4.1	6.8	9.8	12.8	16.3	18.3	17.9	15.6	11.3	6.8	3.7	68	61	57	53
Qpe	T-FR-011	2001002	8	291.089	30	4	47.8091	0.390286	156.75	6.2	7.6	11.4	14.8	18.1	21.9	24.1	23.6	20.9	15.8	10.1	6.5	0.1	0.6	2.2	4.7	7.6	10.8	12.6	12.3	10.3	6.8	3.5	0.9	3.1	4.1	6.8	9.8	12.8	16.3	18.3	17.9	15.6	11.3	6.8	3.7	68	61	57	53
Qpe	T-FR-011	2001005	8	312.394	33	4	47.8091	0.390286	156.75	6.2	7.6	11.4	14.8	18.1	21.9	24.1	23.6	20.9	15.8	10.1	6.5	0.1	0.6	2.2	4.7	7.6	10.8	12.6	12.3	10.3	6.8	3.5	0.9	3.1	4.1	6.8	9.8	12.8	16.3	18.3	17.9	15.6	11.3	6.8	3.7	68	61	57	53
Qpe	T-FR-011	2002009	8	247.519	18	4	47.8091	0.390286	156.75	6.2	7.6	11.4	14.8	18.1	21.9	24.1	23.6	20.9	15.8	10.1	6.5	0.1	0.6	2.2	4.7	7.6	10.8	12.6	12.3	10.3	6.8	3.5	0.9	3.1	4.1	6.8	9.8	12.8	16.3	18.3	17.9	15.6	11.3	6.8	3.7	68	61	57	53
Qpe	T-FR-011	2002010	8	316.8	15	4	47.8091	0.390286	156.75	6.2	7.6	11.4	14.8	18.1	21.9	24.1	23.6	20.9	15.8	10.1	6.5	0.1	0.6	2.2	4.7	7.6	10.8	12.6	12.3	10.3	6.8	3.5	0.9	3.1	4.1	6.8	9.8	12.8	16.3	18.3	17.9	15.6	11.3	6.8	3.7	68	61	57	53
Qpe	T-FR-011	2003014	8	277.97	22	4	47.8091	0.390286	156.75	6.2	7.6	11.4	14.8	18.1	21.9	24.1	23.6	20.9	15.8	10.1	6.5	0.1	0.6	2.2	4.7	7.6	10.8	12.6	12.3	10.3	6.8	3.5	0.9	3.1	4.1	6.8	9.8	12.8	16.3	18.3	17.9	15.6	11.3	6.8	3.7	68	61	57	53
Qpe	T-FR-011	2003015	8	270.125	24	4	47.8091	0.390286	156.75	6.2	7.6	11.4	14.8	18.1	21.9	24.1	23.6	20.9	15.8	10.1	6.5	0.1	0.6	2.2	4.7	7.6	10.8	12.6	12.3	10.3	6.8	3.5	0.9	3.1	4.1	6.8	9.8	12.8	16.3	18.3	17.9	15.6	11.3	6.8	3.7	68	61	57	53
Qpe	T-FR-011	2003016	8	219.6	15	4	47.8091	0.390286	156.75	6.2	7.6	11.4	14.8	18.1	21.9	24.1	23.6	20.9	15.8	10.1	6.5	0.1	0.6	2.2	4.7	7.6	10.8	12.6	12.3	10.3	6.8	3.5	0.9	3.1	4.1	6.8	9.8	12.8	16.3	18.3	17.9	15.6	11.3	6.8	3.7	68	61	57	53
Qpe	T-FR-011	2004020	8	247.241	18	4	47.8091	0.390286	156.75	6.2	7.6	11.4	14.8	18.1	21.9	24.1	23.6	20.9	15.8	10.1	6.5	0.1	0.6	2.2	4.7	7.6	10.8	12.6	12.3	10.3	6.8	3.5	0.9	3.1	4.1	6.8	9.8	12.8	16.3	18.3	17.9	15.6	11.3	6.8	3.7	68	61	57	53
Qpe	T-FR-011	2004023	8	241.573	39	4	47.8091	0.390286	156.75	6.2	7.6	11.4	14.8	18.1	21.9	24.1	23.6	20.9	15.8	10.1	6.5	0.1	0.6	2.2	4.7	7.6	10.8	12.6	12.3	10.3	6.8	3.5	0.9	3.1	4.1	6.8	9.8	12.8	16.3	18.3	17.9	15.6	11.3	6.8	3.7	68	61	57	53
Qpe	T-FR-011	2005025	8	224.786	14	4	47.8091	0.390286	156.75	6.2	7.6	11.4	14.8	18.1	21.9	24.1	23.6	20.9	15.8	10.1	6.5	0.1	0.6	2.2	4.7	7.6	10.8	12.6	12.3	10.3	6.8	3.5	0.9	3.1	4.1	6.8	9.8	12.8	16.3	18.3	17.9	15.6	11.3	6.8	3.7	68	61	57	53
Qpe	T-FR-011	2005028	8	275.972	12	4	47.8091	0.390286	156.75	6.2	7.6	11.4	14.8	18.1	21.9	24.1	23.6	20.9	15.8	10.1	6.5	0.1	0.6	2.2	4.7	7.6	10.8	12.6	12.3	10.3	6.8	3.5	0.9	3.1	4.1	6.8	9.8	12.8	16.3	18.3	17.9	15.6	11.3	6.8	3.7	68	61	57	53
Qpe	T-FR-011	2006029	8	279.214	14	4	47.8091	0.390286	156.75	6.2	7.6	11.4	14.8	18.1	21.9	24.1	23.6	20.9	15.8	10.1	6.5	0.1	0.6	2.2	4.7	7.6	10.8	12.6	12.3	10.3	6.8	3.5	0.9	3.1	4.1	6.8	9.8	12.8	16.3	18.3	17.9	15.6	11.3	6.8	3.7	68	61	57	53
Qpe	T-FR-011	2006030	8	266.1	10	4	47.8091	0.390286	156.75	6.2	7.6	11.4	14.8	18.1	21.9	24.1	23.6	20.9	15.8	10.1	6.5	0.1	0.6	2.2	4.7	7.6	10.8	12.6	12.3	10.3	6.8	3.5	0.9	3.1	4.1	6.8	9.8	12.8	16.3	18.3	17.9	15.6	11.3	6.8	3.7	68	61	57	53
Qpe	T-FR-011	2006033	8	306	14	4	47.8091	0.390286	156.75	6.2	7.6	11.4	14.8	18.1	21.9	24.1	23.6	20.9	15.8	10.1	6.5	0.1	0.6	2.2	4.7	7.6	10.8	12.6	12.3	10.3	6.8	3.5	0.9	3.1	4.1	6.8	9.8	12.8	16.3	18.3	17.9	15.6	11.3	6.8	3.7	68	61	57	53
Qpe	T-FR-011	2006034	8	298.593	18	4	47.8091	0.390286	156.75	6.2	7.6	11.4	14.8	18.1	21.9	24.1	23.6	20.9	15.8	10.1	6.5	0.1	0.6	2.2	4.7	7.6	10.8	12.6	12.3	10.3	6.8	3.5	0.9	3.1	4.1	6.8	9.8	12.8	16.3	18.3	17.9	15.6	11.3	6.8	3.7	68	61	57	53
Qpe	T-FR-011	2007035	8	232.117	20	4	47.8091	0.390286	156.75	6.2	7.6	11.4	14.8	18.1	21.9	24.1	23.6	20.9	15.8	10.1	6.5	0.1	0.6	2.2	4.7	7.6	10.8	12.6	12.3	10.3	6.8	3.5	0.9	3.1	4.1	6.8	9.8	12.8	16.3	18.3	17.9	15.6	11.3	6.8	3.7	68	61	57	53
Qpe	T-FR-011	2007036	8	212.133	15	4	47.8091	0.390286	156.75	6.2	7.6	11.4	14.8	18.1	21.9	24.1	23.6	20.9	15.8	10.1	6.5	0.1	0.6	2.2	4.7	7.6	10.8	12.6	12.3	10.3	6.8	3.5	0.9	3.1	4.1	6.8	9.8	12.8	16.3	18.3	17.9	15.6	11.3	6.8	3.7	68	61	57	53
Qpe	T-FR-011	2008040	8	257.841	21	4	47.8091	0.390286	156.75	6.2	7.6	11.4	14.8	18.1	21.9	24.1	23.6	20.9	15.8	10.1	6.5	0.1	0.6	2.2	4.7	7.6	10.8	12.6	12.3	10.3	6.8	3.5	0.9	3.1	4.1	6.8	9.8	12.8	16.3	18.3	17.9	15.6	11.3	6.8	3.7	68	61	57	53
Qpe	T-FR-011	2008041	8	206.19	14	4	47.8091	0.390286	156.75	6.2	7.6	11.4	14.8	18.1	21.9	24.1	23.6	20.9	15.8	10.1	6.5	0.1	0.6	2.2	4.7	7.6	10.8	12.6	12.3	10.3	6.8	3.5	0.9	3.1	4.1	6.8	9.8	12.8	16.3	18.3	17.9	15.6	11.3	6.8	3.7	68	61	57	53
Qpe	T-FR-011	2009049	8	293.729	16	4	47.8091	0.390286	156.75	6.2	7.6	11.4	14.8	18.1	21.9	24.1	23.6	20.9	15.8	10.1	6.5	0.1	0.6	2.2	4.7	7.6	10.8	12.6	12.3	10.3	6.8	3.5	0.9	3.1	4.1	6.8	9.8	12.8	16.3	18.3	17.9	15.6	11.3	6.8	3.7	68	61	57	53
Qpe	T-FR-011	2009050	8	262.244	15	4	47.8091	0.390286	156.75	6.2	7.6	11.4	14.8	18.1	21.9	24.1	23.6	20.9	15.8	10.1	6.5	0.1	0.6	2.2	4.7	7.6	10.8	12.6	12.3	10.3	6.8	3.5	0.9	3.1	4.1	6.8	9.8	12.8	16.3	18.3	17.9	15.6	11.3	6.8	3.7	68	61	57	53
Qpe	T-FR-011	2010055	8	226.54	29	4	47.8091	0.390286	156.75	6.2	7.6	11.4	14.8	18.1	21.9	24.1	23.6	20.9	15.8	10.1	6.5	0.1	0.6	2.2	4.7	7.6	10.8	12.6	12.3	10.3	6.8	3.5	0.9	3.1	4.1	6.8	9.8	12.8	16.3	18.3	17.9	15.6	11.3	6.8	3.7	68	61	57	53
Qpe	T-FR-011	2010056	8	191.762	14	4	47.8091	0.390286	156.75	6.2	7.6	11.4	14.8	18.1	21.9	24.1	23.6	20.9	15.8	10.1	6.5	0.1	0.6	2.2	4.7	7.6	10.8	12.6	12.3	10.3	6.8	3.5	0.9	3.1	4.1	6.8	9.8	12.8	16.3	18.3	17.9	15.6	11.3	6.8	3.7	68	61	57	53
Qpe	T-FR-011	4002024	8	279.373	23	4	47.8091	0.390286	156.75	6.2	7.6	11.4	14.8	18.1	21.9	24.1	23.6	20.9	15.8	10.1	6.5	0.1	0.6	2.2	4.7	7.6	10.8	12.6	12.3	10.3	6.8	3.5	0.9	3.1	4.1	6.8	9.8	12.8	16.3	18.3	17.9	15.6	11.3	6.8	3.7	68	61	57	53
Qpe	T-FR-011	4002031	8	306.986	20	4	47.8091	0.390286	156.75	6.2	7.6	11.4	14.8	18.1	21.9	24.1	23.6	20.9	15.8	10.1	6.5	0.1	0.6	2.2	4.7	7.6	10.8	12.6	12.3	10.3	6.8	3.5	0.9	3.1	4.1	6.8	9.8	12.8	16.3	18.3	17.9	15.6	11.3	6.8	3.7	68	61	57	53
Qpe	T-FR-011	4002032	8	275.149	23	4	47.8091	0.390286	156.75	6.2	7.6	11.4	14.8	18.1	21.9	24.1	23.6	20.9	15.8	10.1	6.5	0.1	0.6	2.2	4.7	7.6	10.8	12.6	12.3	10.3	6.8	3.5	0.9	3.1	4.1	6.8	9.8	12.8	16.3	18.3	17.9	15.6	11.3	6.8	3.7	68	61	57	53
Qpe	T-FR-011	4003040	8	258.518	24	4	47.8091	0.390286	156.75	6.2	7.6	11.4	14.8	18.1	21.9	24.1	23.6	20.9	15.8	10.1	6.5	0.1	0.6	2.2	4.7	7.6	10.8	12.6	12.3	10.3	6.8	3.5	0.9	3.1	4.1	6.8	9.8	12.8	16.3	18.3	17.9	15.6	11.3	6.8	3.7	68	61	57	53
Qpe	T-FR-011	4003050	8	275.671	20	4	47.8091	0.390286	156.75	6.2	7.6	11.4	14.8	18.1	21.9	24.1	23.6	20.9	15.8	10.1	6.5	0.1	0.6	2.2	4.7	7.6	10.8	12.6	12.3	10.3	6.8	3.5	0.9	3.1	4.1	6.8	9.8	12.8	16.3	18.3	17.9	15.6	11.3	6.8	3.7	68	61	57	53
Qpe	T-FR-011	4003058	8	305.758	23	4	47.8091	0.390286	156.75	6.2	7.6	11.4	14.8	18.1	21.9	24.1	23.6	20.9	15.8	10.1	6.5	0.1	0.6	2.2	4.7	7.6	10.8	12.6	12.3	10.3	6.8	3.5	0.9	3.1	4.1	6.8	9.8	12.8	16.3	18.3	17.9	15.6	11.3	6.8	3.7	68	61	57	53
Qpe	T-FR-011	4004066	8	269.652	23	4	47.8091	0.390286	156.75	6.2	7.6	11.4	14.8	18.1	21.9	24.1	23.6	20.9	15.8	10.1	6.5	0.1	0.6	2.2	4.7	7.6	10.8	12.6	12.3	10.3	6.8	3.5	0.9	3.1	4.1	6.8	9.8	12.8	16.3	18.3	17.9	15.6	11.3	6.8	3.7	68	61	57	53
Qpe	T-FR-011	4004067	8	268.4	20	4	47.8091	0.390286	156.75	6.2	7.6	11.4	14.8	18.1	21.9	24.1	23.6	20.9	15.8	10.1	6.5	0.1	0.6	2.2	4.7	7.6	10.8	12.6	12.3	10.3	6.8	3.5	0.9	3.1	4.1	6.8	9.8	12.8	16.3	18.3	17.9	15.6	11.3	6.8	3.7	68	61	57	53
Qpe	T-FR-011	4004069	8	291.126	17	4	47.8091	0.390286	156.75	6.2	7.6	11.4	14.8	18.1	21.9	24.1	23.6	20.9	15.8	10.1	6.5	0.1	0.6	2.2	4.7	7.6	10.8	12.6	12.3	10.3	6.8	3.5	0.9	3.1	4.1	6.8	9.8	12.8	16.3	18.3	17.9	15.6	11.3	6.8	3.7	68	61	57	53
Qpe	T-FR-011	4005078	8	317.243	20	4	47.8091	0.390286	156.75	6.2	7.6	11.4	14.8	18.1	21.9	24.1	23.6	20.9	15.8	10.1	6.5	0.1	0.6	2.2	4.7	7.6	10.8	12.6	12.3	10.3	6.8	3.5	0.9	3.1	4.1	6.8	9.8	12.8	16.3	18.3	17.9	15.6	11.3	6.8	3.7	68	61	57	53
Qpe	T-FR-011	4005085	8	285.241	16	4	47.8091	0.390286	156.75	6.2	7.6	11.4	14.8	18.1	21.9	24.1	23.6	20.9	15.8	10.1	6.5	0.1	0.6	2.2	4.7	7.6	10.8	12.6	12.3	10.3	6.8	3.5	0.9	3.1	4.1	6.8	9.8	12.8	16.3	18.3	17.9	15.6	11.3	6.8	3.7	68	61	57	53
Qpe	T-FR-011	4005090	8	273.37	22	4	47.8091	0.390286	156.75	6.2	7.6	11.4	14.8	18.1	21.9	24.1	23.6	20.9	15.8	10.1	6.5	0.1	0.6	2.2	4.7	7.6	10.8	12.6	12.3	10.3	6.8	3.5	0.9	3.1	4.1	6.8	9.8	12.8	16.3	18.3	17.9	15.6	11.3	6.8	3.7	68	61	57	53
Qpe	T-FR-011	5001001	8	348.319	24	4	47.8091	0.390286	156.75	6.2	7.6	11.4	14.8	18.1	21.9	24.1	23.6	20.9	15.8	10.1	6.5	0.1	0.6	2.2	4.7	7.6	10.8	12.6	12.3	10.3	6.8	3.5	0.9	3.1	4.1	6.8	9.8	12.8	16.3	18.3	17.9	15.6	11.3	6.8	3.7	68	61	57	53
Qpe	T-FR-011	5001002	8	305.907	18	4	47.8091	0.390286	156.75	6.2	7.6	11.4	14.8	18.1	21.9	24.1	23.6	20.9	15.8	10.1	6.5	0.1	0.6	2.2	4.7	7.6	10.8	12.6	12.3	10.3	6.8	3.5	0.9	3.1	4.1	6.8	9.8	12.8	16.3	18.3	17.9	15.6	11.3	6.8	3.7	68	61	57	53
Qpe	T-FR-011	5001008	8	275.449	23	4	47.8091	0.390286	156.75	6.2	7.6	11.4	14.8	18.1	21.9	24.1	23.6	20.9	15.8	10.1	6.5	0.1	0.6	2.2	4.7	7.6	10.8	12.6	12.3	10.3	6.8	3.5	0.9	3.1	4.1	6.8	9.8	12.8	16.3	18.3	17.9	15.6	11.3	6.8	3.7	68	61	57	53
Qpe	T-FR-011	5002010	8	335.159	23	4	47.8091	0.390286	156.75	6.2	7.6	11.4	14.8	18.1	21.9	24.1	23.6	20.9	15.8	10.1	6.5	0.1	0.6	2.2	4.7	7.6	10.8	12.6	12.3	10.3	6.8	3.5	0.9	3.1	4.1	6.8	9.8	12.8	16.3	18.3	17.9	15.6	11.3	6.8	3.7	68	61	57	53
Qpe	T-FR-011	5002011	8	280.063	21	4	47.8091	0.390286	156.75	6.2	7.6	11.4	14.8	18.1	21.9	24.1	23.6	20.9	15.8	10.1	6.5	0.1	0.6	2.2	4.7	7.6	10.8	12.6	12.3	10.3	6.8	3.5	0.9	3.1	4.1	6.8	9.8	12.8	16.3	18.3	17.9	15.6	11.3	6.8	3.7	68	61	57	53
Qpe	T-FR-011	5002012	8	282.117	20	4	47.8091	0.390286	156.75	6.2	7.6	11.4	14.8	18.1	21.9	24.1	23.6	20.9	15.8	10.1	6.5	0.1	0.6	2.2	4.7	7.6	10.8	12.6	12.3	10.3	6.8	3.5	0.9	3.1	4.1	6.8	9.8	12.8	16.3	18.3	17.9	15.6	11.3	6.8	3.7	68	61	57	53
Qpe	T-FR-011	5003021	8	257.961	17	4	47.8091	0.390286	156.75	6.2	7.6	11.4	14.8	18.1	21.9	24.1	23.6	20.9	15.8	10.1	6.5	0.1	0.6	2.2	4.7	7.6	10.8	12.6	12.3	10.3	6.8	3.5	0.9	3.1	4.1	6.8	9.8	12.8	16.3	18.3	17.9	15.6	11.3	6.8	3.7	68	61	57	53
Qpe	T-FR-011	5003023	8	306.591	22	4	47.8091	0.390286	156.75	6.2	7.6	11.4	14.8	18.1	21.9	24.1	23.6	20.9	15.8	10.1	6.5	0.1	0.6	2.2	4.7	7.6	10.8	12.6	12.3	10.3	6.8	3.5	0.9	3.1	4.1	6.8	9.8	12.8	16.3	18.3	17.9	15.6	11.3	6.8	3.7	68	61	57	53
Qpe	T-FR-011	5003024	8	304.211	19	4	47.8091	0.390286	156.75	6.2	7.6	11.4	14.8	18.1	21.9	24.1	23.6	20.9	15.8	10.1	6.5	0.1	0.6	2.2	4.7	7.6	10.8	12.6	12.3	10.3	6.8	3.5	0.9	3.1	4.1	6.8	9.8	12.8	16.3	18.3	17.9	15.6	11.3	6.8	3.7	68	61	57	53
Qpe	T-FR-011	5004025	8	319.758	22	4	47.8091	0.390286	156.75	6.2	7.6	11.4	14.8	18.1	21.9	24.1	23.6	20.9	15.8	10.1	6.5	0.1	0.6	2.2	4.7	7.6	10.8	12.6	12.3	10.3	6.8	3.5	0.9	3.1	4.1	6.8	9.8	12.8	16.3	18.3	17.9	15.6	11.3	6.8	3.7	68	61	57	53
Qpe	T-FR-011	5004027	8	262.019	18	4	47.8091	0.390286	156.75	6.2	7.6	11.4	14.8	18.1	21.9	24.1	23.6	20.9	15.8	10.1	6.5	0.1	0.6	2.2	4.7	7.6	10.8	12.6	12.3	10.3	6.8	3.5	0.9	3.1	4.1	6.8	9.8	12.8	16.3	18.3	17.9	15.6	11.3	6.8	3.7	68	61	57	53
Qpe	T-FR-011	5004031	8	319.431	24	4	47.8091	0.390286	156.75	6.2	7.6	11.4	14.8	18.1	21.9	24.1	23.6	20.9	15.8	10.1	6.5	0.1	0.6	2.2	4.7	7.6	10.8	12.6	12.3	10.3	6.8	3.5	0.9	3.1	4.1	6.8	9.8	12.8	16.3	18.3	17.9	15.6	11.3	6.8	3.7	68	61	57	53
Qpe	T-FR-011	5005033	8	239.29	23	4	47.8091	0.390286	156.75	6.2	7.6	11.4	14.8	18.1	21.9	24.1	23.6	20.9	15.8	10.1	6.5	0.1	0.6	2.2	4.7	7.6	10.8	12.6	12.3	10.3	6.8	3.5	0.9	3.1	4.1	6.8	9.8	12.8	16.3	18.3	17.9	15.6	11.3	6.8	3.7	68	61	57	53
Qpe	T-FR-011	5005035	8	244.826	23	4	47.8091	0.390286	156.75	6.2	7.6	11.4	14.8	18.1	21.9	24.1	23.6	20.9	15.8	10.1	6.5	0.1	0.6	2.2	4.7	7.6	10.8	12.6	12.3	10.3	6.8	3.5	0.9	3.1	4.1	6.8	9.8	12.8	16.3	18.3	17.9	15.6	11.3	6.8	3.7	68	61	57	53
Qpe	T-FR-011	5005036	8	256.208	24	4	47.8091	0.390286	156.75	6.2	7.6	11.4	14.8	18.1	21.9	24.1	23.6	20.9	15.8	10.1	6.5	0.1	0.6	2.2	4.7	7.6	10.8	12.6	12.3	10.3	6.8	3.5	0.9	3.1	4.1	6.8	9.8	12.8	16.3	18.3	17.9	15.6	11.3	6.8	3.7	68	61	57	53
Qpe	T-FR-011	4002026	8	235.896	22	41	56.1315	9.396	250	1.3	1.9	4.1	7.8	13.6	16.9	17.9	18.1	14.6	10.5	6	2.9	-6	-6	-2.9	1.3	6.1	9.4	11	10.2	7.8	4.5	-0.4	-0.8	-2.4	-2	0.6	4.6	9.8	13.1	14.5	14.1	11.2	7.5	2.8	1.1	61	42	47	47
Qpe	T-FR-011	4002035	8	219.469	21	41	56.1315	9.396	250	1.3	1.9	4.1	7.8	13.6	16.9	17.9	18.1	14.6	10.5	6	2.9	-6	-6	-2.9	1.3	6.1	9.4	11	10.2	7.8	4.5	-0.4	-0.8	-2.4	-2	0.6	4.6	9.8	13.1	14.5	14.1	11.2	7.5	2.8	1.1	61	42	47	47
Qpe	T-FR-011	4003043	8	255.61	22	41	56.1315	9.396	250	1.3	1.9	4.1	7.8	13.6	16.9	17.9	18.1	14.6	10.5	6	2.9	-6	-6	-2.9	1.3	6.1	9.4	11	10.2	7.8	4.5	-0.4	-0.8	-2.4	-2	0.6	4.6	9.8	13.1	14.5	14.1	11.2	7.5	2.8	1.1	61	42	47	47
Qpe	T-FR-011	4003052	8	252.286	18	41	56.1315	9.396	250	1.3	1.9	4.1	7.8	13.6	16.9	17.9	18.1	14.6	10.5	6	2.9	-6	-6	-2.9	1.3	6.1	9.4	11	10.2	7.8	4.5	-0.4	-0.8	-2.4	-2	0.6	4.6	9.8	13.1	14.5	14.1	11.2	7.5	2.8	1.1	61	42	47	47
Qpe	T-FR-011	4004064	8	233.333	24	41	56.1315	9.396	250	1.3	1.9	4.1	7.8	13.6	16.9	17.9	18.1	14.6	10.5	6	2.9	-6	-6	-2.9	1.3	6.1	9.4	11	10.2	7.8	4.5	-0.4	-0.8	-2.4	-2	0.6	4.6	9.8	13.1	14.5	14.1	11.2	7.5	2.8	1.1	61	42	47	47
Qpe	T-FR-011	4004066	8	202.446	24	41	56.1315	9.396	250	1.3	1.9	4.1	7.8	13.6	16.9	17.9	18.1	14.6	10.5	6	2.9	-6	-6	-2.9	1.3	6.1	9.4	11	10.2	7.8	4.5	-0.4	-0.8	-2.4	-2	0.6	4.6	9.8	13.1	14.5	14.1	11.2	7.5	2.8	1.1	61	42	47	47
Qpe	T-FR-011	4005081	8	276.429	16	41	56.1315	9.396	250	1.3	1.9	4.1	7.8	13.6	16.9	17.9	18.1	14.6	10.5	6	2.9	-6	-6	-2.9	1.3	6.1	9.4	11	10.2	7.8	4.5	-0.4	-0.8	-2.4	-2	0.6	4.6	9.8	13.1	14.5	14.1	11.2	7.5	2.8	1.1	61	42	47	47
Qpe	T-FR-011	4005095	8	256.054	21	41	56.1315	9.396	250	1.3	1.9	4.1	7.8	13.6	16.9	17.9	18.1	14.6	10.5	6	2.9	-6	-6	-2.9	1.3	6.1	9.4	11	10.2	7.8	4.5	-0.4	-0.8	-2.4	-2	0.6	4.6	9.8	13.1	14.5	14.1	11.2	7.5	2.8	1.1	61	42	47	47
Qpe	T-FR-011	1001003	8	287.276	23	50	46.604	0.178	130	6.9	8.3	12.3	15.4	18.5	22.5	24.6	24.1	21.8	16.6	11	7.3	0.6	1.2	2.8	5.3	8	11.4	13.2	12.8	11.1	7.4	4.1	1.3	3.7	4.7	7.5	10.3	13.2	16.9	18.9	18.5	16.4	12	7.5	4.3	70	62	57	53
Qpe	T-FR-011	1001006	8	240.49	15	50	46.604	0.178	130	6.9	8.3	12.3	15.4	18.5	22.5	24.6	24.1	21.8	16.6	11	7.3	0.6	1.2	2.8	5.3	8	11.4	13.2	12.8	11.1	7.4	4.1	1.3	3.7	4.7	7.5	10.3	13.2	16.9	18.9	18.5	16.4	12	7.5	4.3	70	62	57	53
Qpe	T-FR-011	1002007	8	231.365	18	50	46.604	0.178	130	6.9	8.3	12.3	15.4	18.5	22.5	24.6	24.1	21.8	16.6	11	7.3	0.6	1.2	2.8	5.3	8	11.4	13.2	12.8	11.1	7.4	4.1	1.3	3.7	4.7	7.5	10.3	13.2	16.9	18.9	18.5	16.4	12	7.5	4.3	70	62	57	53
Qpe	T-FR-011	1002010	8	257.969	14	50	46.604	0.178	130	6.9	8.3	12.3	15.4	18.5	22.5	24.6	24.1	21.8	16.6	11	7.3	0.6	1.2	2.8	5.3	8	11.4	13.2	12.8	11.1	7.4	4.1	1.3	3.7	4.7	7.5	10.3	13.2	16.9	18.9	18.5	16.4	12	7.5	4.3	70	62	57	53
Qpe	T-FR-011	1003015	8	242.119	21	50	46.604	0.178	130	6.9	8.3	12.3	15.4	18.5	22.5	24.6	24.1	21.8	16.6	11	7.3	0.6	1.2	2.8	5.3	8	11.4	13.2	12.8	11.1	7.4	4.1	1.3	3.7	4.7	7.5	10.3	13.2	16.9	18.9	18.5	16.4	12	7.5	4.3	70	62	57	53
Qpe	T-FR-011	1003018	8	243.083	24	50	46.604	0.178	130	6.9	8.3	12.3	15.4	18.5	22.5	24.6	24.1	21.8	16.6	11	7.3	0.6	1.2	2.8	5.3	8	11.4	13.2	12.8	11.1	7.4	4.1	1.3	3.7	4.7	7.5	10.3	13.2	16.9	18.9	18.5	16.4	12	7.5	4.3	70	62	57	53
Qpe	T-FR-011	1004024	8	228.925	19	50	46.604	0.178	130	6.9	8.3	12.3	15.4	18.5	22.5	24.6	24.1	21.8	16.6	11	7.3	0.6	1.2	2.8	5.3	8	11.4	13.2	12.8	11.1	7.4	4.1	1.3	3.7	4.7	7.5	10.3	13.2	16.9	18.9	18.5	16.4	12	7.5	4.3	70	62	57	53
Qpe	T-FR-011	1005027	8	174.233	19	50	46.604	0.178	130	6.9	8.3	12.3	15.4	18.5	22.5	24.6	24.1	21.8	16.6	11	7.3	0.6	1.2	2.8	5.3	8	11.4	13.2	12.8	11.1	7.4	4.1	1.3	3.7	4.7	7.5	10.3	13.2	16.9	18.9	18.5	16.4	12	7.5	4.3	70	62	57	53
Qpe	T-FR-011	1005028	8	209.962	20	50	46.604	0.178	130	6.9	8.3	12.3	15.4	18.5	22.5	24.6	24.1	21.8	16.6	11	7.3	0.6	1.2	2.8	5.3	8	11.4	13.2	12.8	11.1	7.4	4.1	1.3	3.7	4.7	7.5	10.3	13.2	16.9	18.9	18.5	16.4	12	7.5	4.3	70	62	57	53
Qpe	T-FR-011	4002020	8	288.706	18	61	51.769	7.174	75	3.9	5	8.3	12.8	17.4	20.5	21.9	21.5	18.9	14.4	7.9	4.9	-0.9	-0.6	1.6	4.1	7.9	10.8	12.5	12	9.7	6.8	2.8	0.2	1.5	2.2	5	8.5	12.7	15.7	17.2	16.7	14.3	10.6	5.4	2.5	71	49	64	55
Qpe	T-FR-011	4002034	8	288.758	23	61	51.769	7.174	75	3.9	5	8.3	12.8	17.4	20.5	21.9	21.5	18.9	14.4	7.9	4.9	-0.9	-0.6	1.6	4.1	7.9	10.8	12.5	12	9.7	6.8	2.8	0.2	1.5	2.2	5	8.5	12.7	15.7	17.2	16.7	14.3	10.6	5.4	2.5	71	49	64	55
Qpe	T-FR-011	4003042	8	277.157	20	61	51.769	7.174	75	3.9	5	8.3	12.8	17.4	20.5	21.9	21.5	18.9	14.4	7.9	4.9	-0.9	-0.6	1.6	4.1	7.9	10.8	12.5	12	9.7	6.8	2.8	0.2	1.5	2.2	5	8.5	12.7	15.7	17.2	16.7	14.3	10.6	5.4	2.5	71	49	64	55
Qpe	T-FR-011	4003055	8	265.621	23	61	51.769	7.174	75	3.9	5	8.3	12.8	17.4	20.5	21.9	21.5	18.9	14.4	7.9	4.9	-0.9	-0.6	1.6	4.1	7.9	10.8	12.5	12	9.7	6.8	2.8	0.2	1.5	2.2	5	8.5	12.7	15.7	17.2	16.7	14.3	10.6	5.4	2.5	71	49	64	55
Qpe	T-FR-011	4004075	8	267.202	24	61	51.769	7.174	75	3.9	5	8.3	12.8	17.4	20.5	21.9	21.5	18.9	14.4	7.9	4.9	-0.9	-0.6	1.6	4.1	7.9	10.8	12.5	12	9.7	6.8	2.8	0.2	1.5	2.2	5	8.5	12.7	15.7	17.2	16.7	14.3	10.6	5.4	2.5	71	49	64	55
Qpe	T-FR-011	4004077	8	315.907	23	61	51.769	7.174	75	3.9	5	8.3	12.8	17.4	20.5	21.9	21.5	18.9	14.4	7.9	4.9	-0.9	-0.6	1.6	4.1	7.9	10.8	12.5	12	9.7	6.8	2.8	0.2	1.5	2.2	5	8.5	12.7	15.7	17.2	16.7	14.3	10.6	5.4	2.5	71	49	64	55
Qpe	T-FR-011	4005079	8	288.378	17	61	51.769	7.174	75	3.9	5	8.3	12.8	17.4	20.5	21.9	21.5	18.9	14.4	7.9	4.9	-0.9	-0.6	1.6	4.1	7.9	10.8	12.5	12	9.7	6.8	2.8	0.2	1.5	2.2	5	8.5	12.7	15.7	17.2	16.7	14.3	10.6	5.4	2.5	71	49	64	55
Qpe	T-FR-011	4005095	8	297	20	61	51.769	7.174	75	3.9	5	8.3	12.8	17.4	20.5	21.9	21.5	18.9	14.4	7.9	4.9	-0.9	-0.6	1.6	4.1	7.9	10.8	12.5	12	9.7	6.8	2.8	0.2	1.5	2.2	5	8.5	12.7	15.7	17.2	16.7	14.3	10.6	5.4	2.5	71	49	64	55
Qpe	T-FR-011	2001006	8	324.37	18	77	47.761	5.487	330	3.4	5.3	10	14.1	17.8	21.1	23.4	22.9	20.1	14.5	8.2	3.9	-1.8	-1.3	1.3	4.4	7.7	11.1	12.9	12.5	10.4	6.2	2	-0.9	0.8	2	5.6	9.2	12.7	16.1	18.1	17.7	15.3	10.4	5.1	1.5	83	71	72	56
Qpe	T-FR-011	2002009	8	256.974	13	77	47.761	5.487	330	3.4	5.3	10	14.1	17.8	21.1	23.4	22.9	20.1	14.5	8.2	3.9	-1.8	-1.3	1.3	4.4	7.7	11.1	12.9	12.5	10.4	6.2	2	-0.9	0.8	2	5.6	9.2	12.7	16.1	18.1	17.7	15.3	10.4	5.1	1.5	83	71	72	56
Qpe	T-FR-011	2003014	8	235.767	20	77	47.761	5.487	330	3.4	5.3	10	14.1	17.8	21.1	23.4	22.9	20.1	14.5	8.2	3.9	-1.8	-1.3	1.3	4.4	7.7	11.1	12.9	12.5	10.4	6.2	2	-0.9	0.8	2	5.6	9.2	12.7	16.1	18.1	17.7	15.3	10.4	5.1	1.5	83	71	72	56
Qpe	T-FR-011	2004020	8	257.8	15	77	47.761	5.487	330	3.4	5.3	10	14.1	17.8	21.1	23.4	22.9	20.1	14.5	8.2	3.9	-1.8	-1.3	1.3	4.4	7.7	11.1	12.9	12.5	10.4	6.2	2	-0.9	0.8	2	5.6	9.2	12.7	16.1	18.1	17.7	15.3	10.4	5.1	1.5	83	71	72	56
Qpe	T-FR-011	2005025	8	192.633	10	77	47.761	5.487	330	3.4	5.3	10	14.1	17.8	21.1	23.4	22.9	20.1	14.5	8.2	3.9	-1.8	-1.3	1.3	4.4	7.7	11.1	12.9	12.5	10.4	6.2	2	-0.9	0.8	2	5.6	9.2	12.7	16.1	18.1	17.7	15.3	10.4	5.1	1.5	83	71	72	56
Qpe	T-FR-011	2006032	8	284.754	19	77	47.761	5.487	330	3.4	5.3	10	14.1	17.8	21.1	23.4	22.9	20.1	14.5	8.2	3.9	-1.8	-1.3	1.3	4.4	7.7	11.1	12.9	12.5	10.4	6.2	2	-0.9	0.8	2	5.6	9.2	12.7	16.1	18.1	17.7	15.3	10.4	5.1	1.5	83	71	72	56
Qpe	T-FR-011	2007037	8	204.185	9	77	47.761	5.487	330	3.4	5.3	10	14.1	17.8	21.1	23.4	22.9	20.1	14.5	8.2	3.9	-1.8	-1.3	1.3	4.4	7.7	11.1	12.9	12.5	10.4	6.2	2	-0.9	0.8	2	5.6	9.2	12.7	16.1	18.1	17.7	15.3	10.4	5.1	1.5	83	71	72	56
Qpe	T-FR-011	2008044	8	343.315	18	77	47.761	5.487	330	3.4	5.3	10	14.1	17.8	21.1	23.4	22.9	20.1	14.5	8.2	3.9	-1.8	-1.3	1.3	4.4	7.7	11.1	12.9	12.5	10.4	6.2	2	-0.9	0.8	2	5.6	9.2	12.7	16.1	18.1	17.7	15.3	10.4	5.1	1.5	83	71	72	56
Qpe	T-FR-011	2009051	8	272.636	22	77	47.761	5.487	330	3.4	5.3	10	14.1	17.8	21.1	23.4	22.9	20.1	14.5	8.2	3.9	-1.8	-1.3	1.3	4.4	7.7	11.1	12.9	12.5	10.4	6.2	2	-0.9	0.8	2	5.6	9.2	12.7	16.1	18.1	17.7	15.3	10.4	5.1	1.5	83	71	72	56
Qpe	T-FR-011	2010053	8	203.889	9	77	47.761	5.487	330	3.4	5.3	10	14.1	17.8	21.1	23.4	22.9	20.1	14.5	8.2	3.9	-1.8	-1.3	1.3	4.4	7.7	11.1	12.9	12.5	10.4	6.2	2	-0.9	0.8	2	5.6	9.2	12.7	16.1	18.1	17.7	15.3	10.4	5.1	1.5	83	71	72	56
Qpe	T-FR-011	4002032	8	235.15	19	77	47.761	5.487	330	3.4	5.3	10	14.1	17.8	21.1	23.4	22.9	20.1	14.5	8.2	3.9	-1.8	-1.3	1.3	4.4	7.7	11.1	12.9	12.5	10.4	6.2	2	-0.9	0.8	2	5.6	9.2	12.7	16.1	18.1	17.7	15.3	10.4	5.1	1.5	83	71	72	56
Qpe	T-FR-011	4002036	8	273.469	21	77	47.761	5.487	330	3.4	5.3	10	14.1	17.8	21.1	23.4	22.9	20.1	14.5	8.2	3.9	-1.8	-1.3	1.3	4.4	7.7	11.1	12.9	12.5	10.4	6.2	2	-0.9	0.8	2	5.6	9.2	12.7	16.1	18.1	17.7	15.3	10.4	5.1	1.5	83	71	72	56
Qpe	T-FR-011	4002038	8	310.464	16	77	47.761	5.487	330	3.4	5.3	10	14.1	17.8	21.1	23.4	22.9	20.1	14.5	8.2	3.9	-1.8	-1.3	1.3	4.4	7.7	11.1	12.9	12.5	10.4	6.2	2	-0.9	0.8	2	5.6	9.2	12.7	16.1	18.1	17.7	15.3	10.4	5.1	1.5	83	71	72	56
Qpe	T-FR-011	4003042	8	281.079	18	77	47.761	5.487	330	3.4	5.3	10	14.1	17.8	21.1	23.4	22.9	20.1	14.5	8.2	3.9	-1.8	-1.3	1.3	4.4	7.7	11.1	12.9	12.5	10.4	6.2	2	-0.9	0.8	2	5.6	9.2	12.7	16.1	18.1	17.7	15.3	10.4	5.1	1.5	83	71	72	56
Qpe	T-FR-011	4003052	8	313.95	20	77	47.761	5.487	330	3.4	5.3	10	14.1	17.8	21.1	23.4	22.9	20.1	14.5	8.2	3.9	-1.8	-1.3	1.3	4.4	7.7	11.1	12.9	12.5	10.4	6.2	2	-0.9	0.8	2	5.6	9.2	12.7	16.1	18.1	17.7	15.3	10.4	5.1	1.5	83	71	72	56
Qpe	T-FR-011	4003057	8	268.023	19	77	47.761	5.487	330	3.4	5.3	10	14.1	17.8	21.1	23.4	22.9	20.1	14.5	8.2	3.9	-1.8	-1.3	1.3	4.4	7.7	11.1	12.9	12.5	10.4	6.2	2	-0.9	0.8	2	5.6	9.2	12.7	16.1	18.1	17.7	15.3	10.4	5.1	1.5	83	71	72	56
Qpe	T-FR-011	4004062	8	299.807	20	77	47.761	5.487	330	3.4	5.3	10	14.1	17.8	21.1	23.4	22.9	20.1	14.5	8.2	3.9	-1.8	-1.3	1.3	4.4	7.7	11.1	12.9	12.5	10.4	6.2	2	-0.9	0.8	2	5.6	9.2	12.7	16.1	18.1	17.7	15.3	10.4	5.1	1.5	83	71	72	56
Qpe	T-FR-011	4004070	8	303.112	23	77	47.761	5.487	330	3.4	5.3	10	14.1	17.8	21.1	23.4	22.9	20.1	14.5	8.2	3.9	-1.8	-1.3	1.3	4.4	7.7	11.1	12.9	12.5	10.4	6.2	2	-0.9	0.8	2	5.6	9.2	12.7	16.1	18.1	17.7	15.3	10.4	5.1	1.5	83	71	72	56
Qpe	T-FR-011	4004076	8	270.214	20	77	47.761	5.487	330	3.4	5.3	10	14.1	17.8	21.1	23.4	22.9	20.1	14.5	8.2	3.9	-1.8	-1.3	1.3	4.4	7.7	11.1	12.9	12.5	10.4	6.2	2	-0.9	0.8	2	5.6	9.2	12.7	16.1	18.1	17.7	15.3	10.4	5.1	1.5	83	71	72	56
Qpe	T-FR-011	4005079	8	274.955	19	77	47.761	5.487	330	3.4	5.3	10	14.1	17.8	21.1	23.4	22.9	20.1	14.5	8.2	3.9	-1.8	-1.3	1.3	4.4	7.7	11.1	12.9	12.5	10.4	6.2	2	-0.9	0.8	2	5.6	9.2	12.7	16.1	18.1	17.7	15.3	10.4	5.1	1.5	83	71	72	56
Qpe	T-FR-011	4005087	8	335.636	22	77	47.761	5.487	330	3.4	5.3	10	14.1	17.8	21.1	23.4	22.9	20.1	14.5	8.2	3.9	-1.8	-1.3	1.3	4.4	7.7	11.1	12.9	12.5	10.4	6.2	2	-0.9	0.8	2	5.6	9.2	12.7	16.1	18.1	17.7	15.3	10.4	5.1	1.5	83	71	72	56
Qpe	T-FR-011	4005090	8	301.688	22	77	47.761	5.487	330	3.4	5.3	10	14.1	17.8	21.1	23.4	22.9	20.1	14.5	8.2	3.9	-1.8	-1.3	1.3	4.4	7.7	11.1	12.9	12.5	10.4	6.2	2	-0.9	0.8	2	5.6	9.2	12.7	16.1	18.1	17.7	15.3	10.4	5.1	1.5	83	71	72	56
Qpe	T-FR-011	4002024	8	267.112	46	87	49.361	7.872	470	1.1	3.3	7.3	12	16.1	19.9	21.3	20.4	18.6	13	6.2	3	-3.8	-3.2	-0.9	2.4	5.9	9.4	10.9	10.5	8.2	4.6	0.4	-2.2	-1.4	0	3.2	7.2	11	14.6	16.1	15.4	13.4	8.8	3.3	0.4	63	54	51	52
Qpe	T-FR-011	4002027	8	292.623	22	87	49.361	7.872	470	1.1	3.3	7.3	12	16.1	19.9	21.3	20.4	18.6	13	6.2	3	-3.8	-3.2	-0.9	2.4	5.9	9.4	10.9	10.5	8.2	4.6	0.4	-2.2	-1.4	0	3.2	7.2	11	14.6	16.1	15.4	13.4	8.8	3.3	0.4	63	54	51	52
Qpe	T-FR-011	4002028	8	297.09	19	87	49.361	7.872	470	1.1	3.3	7.3	12	16.1	19.9	21.3	20.4	18.6	13	6.2	3	-3.8	-3.2	-0.9	2.4	5.9	9.4	10.9	10.5	8.2	4.6	0.4	-2.2	-1.4	0	3.2	7.2	11	14.6	16.1	15.4	13.4	8.8	3.3	0.4	63	54	51	52
Qpe	T-FR-011	4003049	8	301.609	23	87	49.361	7.872	470	1.1	3.3	7.3	12	16.1	19.9	21.3	20.4	18.6	13	6.2	3	-3.8	-3.2	-0.9	2.4	5.9	9.4	10.9	10.5	8.2	4.6	0.4	-2.2	-1.4	0	3.2	7.2	11	14.6	16.1	15.4	13.4	8.8	3.3	0.4	63	54	51	52
Qpe	T-FR-011	4003050	8	271.491	23	87	49.361	7.872	470	1.1	3.3	7.3	12	16.1	19.9	21.3	20.4	18.6	13	6.2	3	-3.8	-3.2	-0.9	2.4	5.9	9.4	10.9	10.5	8.2	4.6	0.4	-2.2	-1.4	0	3.2	7.2	11	14.6	16.1	15.4	13.4	8.8	3.3	0.4	63	54	51	52
Qpe	T-FR-011	4003053	8	373.336	20	87	49.361	7.872	470	1.1	3.3	7.3	12	16.1	19.9	21.3	20.4	18.6	13	6.2	3	-3.8	-3.2	-0.9	2.4	5.9	9.4	10.9	10.5	8.2	4.6	0.4	-2.2	-1.4	0	3.2	7.2	11	14.6	16.1	15.4	13.4	8.8	3.3	0.4	63	54	51	52
Qpe	T-FR-011	4003054	8	311.421	20	87	49.361	7.872	470	1.1	3.3	7.3	12	16.1	19.9	21.3	20.4	18.6	13	6.2	3	-3.8	-3.2	-0.9	2.4	5.9	9.4	10.9	10.5	8.2	4.6	0.4	-2.2	-1.4	0	3.2	7.2	11	14.6	16.1	15.4	13.4	8.8	3.3	0.4	63	54	51	52
Qpe	T-FR-011	4004059	8	276.958	17	87	49.361	7.872	470	1.1	3.3	7.3	12	16.1	19.9	21.3	20.4	18.6	13	6.2	3	-3.8	-3.2	-0.9	2.4	5.9	9.4	10.9	10.5	8.2	4.6	0.4	-2.2	-1.4	0	3.2	7.2	11	14.6	16.1	15.4	13.4	8.8	3.3	0.4	63	54	51	52
Qpe	T-FR-011	4004064	8	300.596	23	87	49.361	7.872	470	1.1	3.3	7.3	12	16.1	19.9	21.3	20.4	18.6	13	6.2	3	-3.8	-3.2	-0.9	2.4	5.9	9.4	10.9	10.5	8.2	4.6	0.4	-2.2	-1.4	0	3.2	7.2	11	14.6	16.1	15.4	13.4	8.8	3.3	0.4	63	54	51	52
Qpe	T-FR-011	4004066	8	317.49	21	87	49.361	7.872	470	1.1	3.3	7.3	12	16.1	19.9	21.3	20.4	18.6	13	6.2	3	-3.8	-3.2	-0.9	2.4	5.9	9.4	10.9	10.5	8.2	4.6	0.4	-2.2	-1.4	0	3.2	7.2	11	14.6	16.1	15.4	13.4	8.8	3.3	0.4	63	54	51	52
Qpe	T-FR-011	4004074	8	266.451	19	87	49.361	7.872	470	1.1	3.3	7.3	12	16.1	19.9	21.3	20.4	18.6	13	6.2	3	-3.8	-3.2	-0.9	2.4	5.9	9.4	10.9	10.5	8.2	4.6	0.4	-2.2	-1.4	0	3.2	7.2	11	14.6	16.1	15.4	13.4	8.8	3.3	0.4	63	54	51	52
Qpe	T-FR-011	4005078	8	352.614	20	87	49.361	7.872	470	1.1	3.3	7.3	12	16.1	19.9	21.3	20.4	18.6	13	6.2	3	-3.8	-3.2	-0.9	2.4	5.9	9.4	10.9	10.5	8.2	4.6	0.4	-2.2	-1.4	0	3.2	7.2	11	14.6	16.1	15.4	13.4	8.8	3.3	0.4	63	54	51	52
Qpe	T-FR-011	4005092	8	235.913	18	87	49.361	7.872	470	1.1	3.3	7.3	12	16.1	19.9	21.3	20.4	18.6	13	6.2	3	-3.8	-3.2	-0.9	2.4	5.9	9.4	10.9	10.5	8.2	4.6	0.4	-2.2	-1.4	0	3.2	7.2	11	14.6	16.1	15.4	13.4	8.8	3.3	0.4	63	54	51	52
Qpe	T-FR-011	4005093	8	311.396	22	87	49.361	7.872	470	1.1	3.3	7.3	12	16.1	19.9	21.3	20.4	18.6	13	6.2	3	-3.8	-3.2	-0.9	2.4	5.9	9.4	10.9	10.5	8.2	4.6	0.4	-2.2	-1.4	0	3.2	7.2	11	14.6	16.1	15.4	13.4	8.8	3.3	0.4	63	54	51	52
Qpe	T-FR-011	4005094	8	290.802	18	87	49.361	7.872	470	1.1	3.3	7.3	12	16.1	19.9	21.3	20.4	18.6	13	6.2	3	-3.8	-3.2	-0.9	2.4	5.9	9.4	10.9	10.5	8.2	4.6	0.4	-2.2	-1.4	0	3.2	7.2	11	14.6	16.1	15.4	13.4	8.8	3.3	0.4	63	54	51	52
Qpe	T-FR-012	2001002	8	311.292	16	1	51.7942	-2.4895	90.6667	6.4	6.6	8.9	12.2	15.4	18.9	20.4	19.9	17.5	13.9	9.3	7.3	1.1	1	2	4.4	7.1	10.3	11.8	11.6	9.5	7.1	3.4	1.9	3.8	3.8	5.5	8.3	11.3	14.6	16.1	15.7	13.5	10.5	6.4	4.6	81	56	64	54
Qpe	T-FR-012	2001004	8	250.487	13	1	51.7942	-2.4895	90.6667	6.4	6.6	8.9	12.2	15.4	18.9	20.4	19.9	17.5	13.9	9.3	7.3	1.1	1	2	4.4	7.1	10.3	11.8	11.6	9.5	7.1	3.4	1.9	3.8	3.8	5.5	8.3	11.3	14.6	16.1	15.7	13.5	10.5	6.4	4.6	81	56	64	54
Qpe	T-FR-012	2002008	8	292.879	11	1	51.7942	-2.4895	90.6667	6.4	6.6	8.9	12.2	15.4	18.9	20.4	19.9	17.5	13.9	9.3	7.3	1.1	1	2	4.4	7.1	10.3	11.8	11.6	9.5	7.1	3.4	1.9	3.8	3.8	5.5	8.3	11.3	14.6	16.1	15.7	13.5	10.5	6.4	4.6	81	56	64	54
Qpe	T-FR-012	2002009	8	342.093	18	1	51.7942	-2.4895	90.6667	6.4	6.6	8.9	12.2	15.4	18.9	20.4	19.9	17.5	13.9	9.3	7.3	1.1	1	2	4.4	7.1	10.3	11.8	11.6	9.5	7.1	3.4	1.9	3.8	3.8	5.5	8.3	11.3	14.6	16.1	15.7	13.5	10.5	6.4	4.6	81	56	64	54
Qpe	T-FR-012	2003017	8	341.667	13	1	51.7942	-2.4895	90.6667	6.4	6.6	8.9	12.2	15.4	18.9	20.4	19.9	17.5	13.9	9.3	7.3	1.1	1	2	4.4	7.1	10.3	11.8	11.6	9.5	7.1	3.4	1.9	3.8	3.8	5.5	8.3	11.3	14.6	16.1	15.7	13.5	10.5	6.4	4.6	81	56	64	54
Qpe	T-FR-012	2003018	8	296.833	12	1	51.7942	-2.4895	90.6667	6.4	6.6	8.9	12.2	15.4	18.9	20.4	19.9	17.5	13.9	9.3	7.3	1.1	1	2	4.4	7.1	10.3	11.8	11.6	9.5	7.1	3.4	1.9	3.8	3.8	5.5	8.3	11.3	14.6	16.1	15.7	13.5	10.5	6.4	4.6	81	56	64	54
Qpe	T-FR-012	2004020	8	344.65	20	1	51.7942	-2.4895	90.6667	6.4	6.6	8.9	12.2	15.4	18.9	20.4	19.9	17.5	13.9	9.3	7.3	1.1	1	2	4.4	7.1	10.3	11.8	11.6	9.5	7.1	3.4	1.9	3.8	3.8	5.5	8.3	11.3	14.6	16.1	15.7	13.5	10.5	6.4	4.6	81	56	64	54
Qpe	T-FR-012	2004021	8	331.683	21	1	51.7942	-2.4895	90.6667	6.4	6.6	8.9	12.2	15.4	18.9	20.4	19.9	17.5	13.9	9.3	7.3	1.1	1	2	4.4	7.1	10.3	11.8	11.6	9.5	7.1	3.4	1.9	3.8	3.8	5.5	8.3	11.3	14.6	16.1	15.7	13.5	10.5	6.4	4.6	81	56	64	54
Qpe	T-FR-012	2005026	8	338.141	45	1	51.7942	-2.4895	90.6667	6.4	6.6	8.9	12.2	15.4	18.9	20.4	19.9	17.5	13.9	9.3	7.3	1.1	1	2	4.4	7.1	10.3	11.8	11.6	9.5	7.1	3.4	1.9	3.8	3.8	5.5	8.3	11.3	14.6	16.1	15.7	13.5	10.5	6.4	4.6	81	56	64	54
Qpe	T-FR-012	2006031	8	316.667	17	1	51.7942	-2.4895	90.6667	6.4	6.6	8.9	12.2	15.4	18.9	20.4	19.9	17.5	13.9	9.3	7.3	1.1	1	2	4.4	7.1	10.3	11.8	11.6	9.5	7.1	3.4	1.9	3.8	3.8	5.5	8.3	11.3	14.6	16.1	15.7	13.5	10.5	6.4	4.6	81	56	64	54
Qpe	T-FR-012	2006036	8	337.571	14	1	51.7942	-2.4895	90.6667	6.4	6.6	8.9	12.2	15.4	18.9	20.4	19.9	17.5	13.9	9.3	7.3	1.1	1	2	4.4	7.1	10.3	11.8	11.6	9.5	7.1	3.4	1.9	3.8	3.8	5.5	8.3	11.3	14.6	16.1	15.7	13.5	10.5	6.4	4.6	81	56	64	54
Qpe	T-FR-012	2007037	8	337.692	13	1	51.7942	-2.4895	90.6667	6.4	6.6	8.9	12.2	15.4	18.9	20.4	19.9	17.5	13.9	9.3	7.3	1.1	1	2	4.4	7.1	10.3	11.8	11.6	9.5	7.1	3.4	1.9	3.8	3.8	5.5	8.3	11.3	14.6	16.1	15.7	13.5	10.5	6.4	4.6	81	56	64	54
Qpe	T-FR-012	2007042	8	307.833	12	1	51.7942	-2.4895	90.6667	6.4	6.6	8.9	12.2	15.4	18.9	20.4	19.9	17.5	13.9	9.3	7.3	1.1	1	2	4.4	7.1	10.3	11.8	11.6	9.5	7.1	3.4	1.9	3.8	3.8	5.5	8.3	11.3	14.6	16.1	15.7	13.5	10.5	6.4	4.6	81	56	64	54
Qpe	T-FR-012	2008046	8	313.944	30	1	51.7942	-2.4895	90.6667	6.4	6.6	8.9	12.2	15.4	18.9	20.4	19.9	17.5	13.9	9.3	7.3	1.1	1	2	4.4	7.1	10.3	11.8	11.6	9.5	7.1	3.4	1.9	3.8	3.8	5.5	8.3	11.3	14.6	16.1	15.7	13.5	10.5	6.4	4.6	81	56	64	54
Qpe	T-FR-012	2009053	8	299.325	40	1	51.7942	-2.4895	90.6667	6.4	6.6	8.9	12.2	15.4	18.9	20.4	19.9	17.5	13.9	9.3	7.3	1.1	1	2	4.4	7.1	10.3	11.8	11.6	9.5	7.1	3.4	1.9	3.8	3.8	5.5	8.3	11.3	14.6	16.1	15.7	13.5	10.5	6.4	4.6	81	56	64	54
Qpe	T-FR-012	2010058	8	320.487	13	1	51.7942	-2.4895	90.6667	6.4	6.6	8.9	12.2	15.4	18.9	20.4	19.9	17.5	13.9	9.3	7.3	1.1	1	2	4.4	7.1	10.3	11.8	11.6	9.5	7.1	3.4	1.9	3.8	3.8	5.5	8.3	11.3	14.6	16.1	15.7	13.5	10.5	6.4	4.6	81	56	64	54
Qpe	T-FR-012	2010060	8	349.686	17	1	51.7942	-2.4895	90.6667	6.4	6.6	8.9	12.2	15.4	18.9	20.4	19.9	17.5	13.9	9.3	7.3	1.1	1	2	4.4	7.1	10.3	11.8	11.6	9.5	7.1	3.4	1.9	3.8	3.8	5.5	8.3	11.3	14.6	16.1	15.7	13.5	10.5	6.4	4.6	81	56	64	54
Qpe	T-FR-012	4002014	8	221.75	16	1	51.7942	-2.4895	90.6667	6.4	6.6	8.9	12.2	15.4	18.9	20.4	19.9	17.5	13.9	9.3	7.3	1.1	1	2	4.4	7.1	10.3	11.8	11.6	9.5	7.1	3.4	1.9	3.8	3.8	5.5	8.3	11.3	14.6	16.1	15.7	13.5	10.5	6.4	4.6	81	56	64	54
Qpe	T-FR-012	4002018	8	197.188	16	1	51.7942	-2.4895	90.6667	6.4	6.6	8.9	12.2	15.4	18.9	20.4	19.9	17.5	13.9	9.3	7.3	1.1	1	2	4.4	7.1	10.3	11.8	11.6	9.5	7.1	3.4	1.9	3.8	3.8	5.5	8.3	11.3	14.6	16.1	15.7	13.5	10.5	6.4	4.6	81	56	64	54
Qpe	T-FR-012	4003025	8	227.441	17	1	51.7942	-2.4895	90.6667	6.4	6.6	8.9	12.2	15.4	18.9	20.4	19.9	17.5	13.9	9.3	7.3	1.1	1	2	4.4	7.1	10.3	11.8	11.6	9.5	7.1	3.4	1.9	3.8	3.8	5.5	8.3	11.3	14.6	16.1	15.7	13.5	10.5	6.4	4.6	81	56	64	54
Qpe	T-FR-012	4003029	8	233.35	20	1	51.7942	-2.4895	90.6667	6.4	6.6	8.9	12.2	15.4	18.9	20.4	19.9	17.5	13.9	9.3	7.3	1.1	1	2	4.4	7.1	10.3	11.8	11.6	9.5	7.1	3.4	1.9	3.8	3.8	5.5	8.3	11.3	14.6	16.1	15.7	13.5	10.5	6.4	4.6	81	56	64	54
Qpe	T-FR-012	4004040	8	211.263	19	1	51.7942	-2.4895	90.6667	6.4	6.6	8.9	12.2	15.4	18.9	20.4	19.9	17.5	13.9	9.3	7.3	1.1	1	2	4.4	7.1	10.3	11.8	11.6	9.5	7.1	3.4	1.9	3.8	3.8	5.5	8.3	11.3	14.6	16.1	15.7	13.5	10.5	6.4	4.6	81	56	64	54
Qpe	T-FR-012	4005046	8	265.042	12	1	51.7942	-2.4895	90.6667	6.4	6.6	8.9	12.2	15.4	18.9	20.4	19.9	17.5	13.9	9.3	7.3	1.1	1	2	4.4	7.1	10.3	11.8	11.6	9.5	7.1	3.4	1.9	3.8	3.8	5.5	8.3	11.3	14.6	16.1	15.7	13.5	10.5	6.4	4.6	81	56	64	54
Qpe	T-FR-012	4007066	8	247.763	19	1	51.7942	-2.4895	90.6667	6.4	6.6	8.9	12.2	15.4	18.9	20.4	19.9	17.5	13.9	9.3	7.3	1.1	1	2	4.4	7.1	10.3	11.8	11.6	9.5	7.1	3.4	1.9	3.8	3.8	5.5	8.3	11.3	14.6	16.1	15.7	13.5	10.5	6.4	4.6	81	56	64	54
Qpe	T-FR-012	4007070	8	238.972	18	1	51.7942	-2.4895	90.6667	6.4	6.6	8.9	12.2	15.4	18.9	20.4	19.9	17.5	13.9	9.3	7.3	1.1	1	2	4.4	7.1	10.3	11.8	11.6	9.5	7.1	3.4	1.9	3.8	3.8	5.5	8.3	11.3	14.6	16.1	15.7	13.5	10.5	6.4	4.6	81	56	64	54
Qpe	T-FR-012	4009086	8	275.921	19	1	51.7942	-2.4895	90.6667	6.4	6.6	8.9	12.2	15.4	18.9	20.4	19.9	17.5	13.9	9.3	7.3	1.1	1	2	4.4	7.1	10.3	11.8	11.6	9.5	7.1	3.4	1.9	3.8	3.8	5.5	8.3	11.3	14.6	16.1	15.7	13.5	10.5	6.4	4.6	81	56	64	54
Qpe	T-FR-012	2001001	8	312.278	12	21	46.4607	2.89067	270	6.1	7.8	12	15.1	18.5	22.2	24.7	24.1	21.7	16.3	10.3	6.4	-1	-0.3	1.4	4.2	7.3	10.6	12.3	12	10.2	6.1	2.8	-0.2	2.6	3.7	6.7	9.6	12.9	16.4	18.5	18.1	15.9	11.2	6.6	3.1	58	58	56	55
Qpe	T-FR-012	2002008	8	256.722	6	21	46.4607	2.89067	270	6.1	7.8	12	15.1	18.5	22.2	24.7	24.1	21.7	16.3	10.3	6.4	-1	-0.3	1.4	4.2	7.3	10.6	12.3	12	10.2	6.1	2.8	-0.2	2.6	3.7	6.7	9.6	12.9	16.4	18.5	18.1	15.9	11.2	6.6	3.1	58	58	56	55
Qpe	T-FR-012	2003015	8	274.508	21	21	46.4607	2.89067	270	6.1	7.8	12	15.1	18.5	22.2	24.7	24.1	21.7	16.3	10.3	6.4	-1	-0.3	1.4	4.2	7.3	10.6	12.3	12	10.2	6.1	2.8	-0.2	2.6	3.7	6.7	9.6	12.9	16.4	18.5	18.1	15.9	11.2	6.6	3.1	58	58	56	55
Qpe	T-FR-012	2004021	8	305.117	20	21	46.4607	2.89067	270	6.1	7.8	12	15.1	18.5	22.2	24.7	24.1	21.7	16.3	10.3	6.4	-1	-0.3	1.4	4.2	7.3	10.6	12.3	12	10.2	6.1	2.8	-0.2	2.6	3.7	6.7	9.6	12.9	16.4	18.5	18.1	15.9	11.2	6.6	3.1	58	58	56	55
Qpe	T-FR-012	2005027	8	328.368	19	21	46.4607	2.89067	270	6.1	7.8	12	15.1	18.5	22.2	24.7	24.1	21.7	16.3	10.3	6.4	-1	-0.3	1.4	4.2	7.3	10.6	12.3	12	10.2	6.1	2.8	-0.2	2.6	3.7	6.7	9.6	12.9	16.4	18.5	18.1	15.9	11.2	6.6	3.1	58	58	56	55
Qpe	T-FR-012	2006035	8	321.392	17	21	46.4607	2.89067	270	6.1	7.8	12	15.1	18.5	22.2	24.7	24.1	21.7	16.3	10.3	6.4	-1	-0.3	1.4	4.2	7.3	10.6	12.3	12	10.2	6.1	2.8	-0.2	2.6	3.7	6.7	9.6	12.9	16.4	18.5	18.1	15.9	11.2	6.6	3.1	58	58	56	55
Qpe	T-FR-012	2007041	8	294.882	17	21	46.4607	2.89067	270	6.1	7.8	12	15.1	18.5	22.2	24.7	24.1	21.7	16.3	10.3	6.4	-1	-0.3	1.4	4.2	7.3	10.6	12.3	12	10.2	6.1	2.8	-0.2	2.6	3.7	6.7	9.6	12.9	16.4	18.5	18.1	15.9	11.2	6.6	3.1	58	58	56	55
Qpe	T-FR-012	2008045	8	347.241	18	21	46.4607	2.89067	270	6.1	7.8	12	15.1	18.5	22.2	24.7	24.1	21.7	16.3	10.3	6.4	-1	-0.3	1.4	4.2	7.3	10.6	12.3	12	10.2	6.1	2.8	-0.2	2.6	3.7	6.7	9.6	12.9	16.4	18.5	18.1	15.9	11.2	6.6	3.1	58	58	56	55
Qpe	T-FR-012	2009054	8	332.392	17	21	46.4607	2.89067	270	6.1	7.8	12	15.1	18.5	22.2	24.7	24.1	21.7	16.3	10.3	6.4	-1	-0.3	1.4	4.2	7.3	10.6	12.3	12	10.2	6.1	2.8	-0.2	2.6	3.7	6.7	9.6	12.9	16.4	18.5	18.1	15.9	11.2	6.6	3.1	58	58	56	55
Qpe	T-FR-012	2010056	8	293.667	11	21	46.4607	2.89067	270	6.1	7.8	12	15.1	18.5	22.2	24.7	24.1	21.7	16.3	10.3	6.4	-1	-0.3	1.4	4.2	7.3	10.6	12.3	12	10.2	6.1	2.8	-0.2	2.6	3.7	6.7	9.6	12.9	16.4	18.5	18.1	15.9	11.2	6.6	3.1	58	58	56	55
Qpe	T-FR-012	4001003	8	184.111	18	21	46.4607	2.89067	270	6.1	7.8	12	15.1	18.5	22.2	24.7	24.1	21.7	16.3	10.3	6.4	-1	-0.3	1.4	4.2	7.3	10.6	12.3	12	10.2	6.1	2.8	-0.2	2.6	3.7	6.7	9.6	12.9	16.4	18.5	18.1	15.9	11.2	6.6	3.1	58	58	56	55
Qpe	T-FR-012	4001007	8	225.235	17	21	46.4607	2.89067	270	6.1	7.8	12	15.1	18.5	22.2	24.7	24.1	21.7	16.3	10.3	6.4	-1	-0.3	1.4	4.2	7.3	10.6	12.3	12	10.2	6.1	2.8	-0.2	2.6	3.7	6.7	9.6	12.9	16.4	18.5	18.1	15.9	11.2	6.6	3.1	58	58	56	55
Qpe	T-FR-012	4001008	8	228.412	17	21	46.4607	2.89067	270	6.1	7.8	12	15.1	18.5	22.2	24.7	24.1	21.7	16.3	10.3	6.4	-1	-0.3	1.4	4.2	7.3	10.6	12.3	12	10.2	6.1	2.8	-0.2	2.6	3.7	6.7	9.6	12.9	16.4	18.5	18.1	15.9	11.2	6.6	3.1	58	58	56	55
Qpe	T-FR-012	4003022	8	233.577	13	21	46.4607	2.89067	270	6.1	7.8	12	15.1	18.5	22.2	24.7	24.1	21.7	16.3	10.3	6.4	-1	-0.3	1.4	4.2	7.3	10.6	12.3	12	10.2	6.1	2.8	-0.2	2.6	3.7	6.7	9.6	12.9	16.4	18.5	18.1	15.9	11.2	6.6	3.1	58	58	56	55
Qpe	T-FR-012	4003027	8	237.719	16	21	46.4607	2.89067	270	6.1	7.8	12	15.1	18.5	22.2	24.7	24.1	21.7	16.3	10.3	6.4	-1	-0.3	1.4	4.2	7.3	10.6	12.3	12	10.2	6.1	2.8	-0.2	2.6	3.7	6.7	9.6	12.9	16.4	18.5	18.1	15.9	11.2	6.6	3.1	58	58	56	55
Qpe	T-FR-012	4004031	8	230.4	10	21	46.4607	2.89067	270	6.1	7.8	12	15.1	18.5	22.2	24.7	24.1	21.7	16.3	10.3	6.4	-1	-0.3	1.4	4.2	7.3	10.6	12.3	12	10.2	6.1	2.8	-0.2	2.6	3.7	6.7	9.6	12.9	16.4	18.5	18.1	15.9	11.2	6.6	3.1	58	58	56	55
Qpe	T-FR-012	4005042	8	212.423	13	21	46.4607	2.89067	270	6.1	7.8	12	15.1	18.5	22.2	24.7	24.1	21.7	16.3	10.3	6.4	-1	-0.3	1.4	4.2	7.3	10.6	12.3	12	10.2	6.1	2.8	-0.2	2.6	3.7	6.7	9.6	12.9	16.4	18.5	18.1	15.9	11.2	6.6	3.1	58	58	56	55
Qpe	T-FR-012	4005045	8	177.808	13	21	46.4607	2.89067	270	6.1	7.8	12	15.1	18.5	22.2	24.7	24.1	21.7	16.3	10.3	6.4	-1	-0.3	1.4	4.2	7.3	10.6	12.3	12	10.2	6.1	2.8	-0.2	2.6	3.7	6.7	9.6	12.9	16.4	18.5	18.1	15.9	11.2	6.6	3.1	58	58	56	55
Qpe	T-FR-012	4005050	8	168.5	17	21	46.4607	2.89067	270	6.1	7.8	12	15.1	18.5	22.2	24.7	24.1	21.7	16.3	10.3	6.4	-1	-0.3	1.4	4.2	7.3	10.6	12.3	12	10.2	6.1	2.8	-0.2	2.6	3.7	6.7	9.6	12.9	16.4	18.5	18.1	15.9	11.2	6.6	3.1	58	58	56	55
Qpe	T-FR-012	4006057	8	212.406	16	21	46.4607	2.89067	270	6.1	7.8	12	15.1	18.5	22.2	24.7	24.1	21.7	16.3	10.3	6.4	-1	-0.3	1.4	4.2	7.3	10.6	12.3	12	10.2	6.1	2.8	-0.2	2.6	3.7	6.7	9.6	12.9	16.4	18.5	18.1	15.9	11.2	6.6	3.1	58	58	56	55
Qpe	T-FR-012	4007062	8	233.775	20	21	46.4607	2.89067	270	6.1	7.8	12	15.1	18.5	22.2	24.7	24.1	21.7	16.3	10.3	6.4	-1	-0.3	1.4	4.2	7.3	10.6	12.3	12	10.2	6.1	2.8	-0.2	2.6	3.7	6.7	9.6	12.9	16.4	18.5	18.1	15.9	11.2	6.6	3.1	58	58	56	55
Qpe	T-FR-012	4008071	8	215.875	16	21	46.4607	2.89067	270	6.1	7.8	12	15.1	18.5	22.2	24.7	24.1	21.7	16.3	10.3	6.4	-1	-0.3	1.4	4.2	7.3	10.6	12.3	12	10.2	6.1	2.8	-0.2	2.6	3.7	6.7	9.6	12.9	16.4	18.5	18.1	15.9	11.2	6.6	3.1	58	58	56	55
Qpe	T-FR-012	4008073	8	232.559	17	21	46.4607	2.89067	270	6.1	7.8	12	15.1	18.5	22.2	24.7	24.1	21.7	16.3	10.3	6.4	-1	-0.3	1.4	4.2	7.3	10.6	12.3	12	10.2	6.1	2.8	-0.2	2.6	3.7	6.7	9.6	12.9	16.4	18.5	18.1	15.9	11.2	6.6	3.1	58	58	56	55
Qpe	T-FR-012	4009088	8	240.562	16	21	46.4607	2.89067	270	6.1	7.8	12	15.1	18.5	22.2	24.7	24.1	21.7	16.3	10.3	6.4	-1	-0.3	1.4	4.2	7.3	10.6	12.3	12	10.2	6.1	2.8	-0.2	2.6	3.7	6.7	9.6	12.9	16.4	18.5	18.1	15.9	11.2	6.6	3.1	58	58	56	55
Qpe	T-FR-012	4009090	8	282.625	12	21	46.4607	2.89067	270	6.1	7.8	12	15.1	18.5	22.2	24.7	24.1	21.7	16.3	10.3	6.4	-1	-0.3	1.4	4.2	7.3	10.6	12.3	12	10.2	6.1	2.8	-0.2	2.6	3.7	6.7	9.6	12.9	16.4	18.5	18.1	15.9	11.2	6.6	3.1	58	58	56	55
Qpe	T-FR-012	2001004	8	309.044	15	26	51.948	-2.45	70	6.5	6.8	9.1	12.2	15.5	18.9	20.3	19.9	17.6	14.2	9.5	7.4	1.2	1.1	2.2	4.5	7.2	10.3	11.8	11.6	9.6	7.3	3.6	2.1	3.9	4	5.6	8.3	11.3	14.6	16.1	15.7	13.6	10.7	6.5	4.8	69	48	55	49
Qpe	T-FR-012	2002012	8	300.074	9	26	51.948	-2.45	70	6.5	6.8	9.1	12.2	15.5	18.9	20.3	19.9	17.6	14.2	9.5	7.4	1.2	1.1	2.2	4.5	7.2	10.3	11.8	11.6	9.6	7.3	3.6	2.1	3.9	4	5.6	8.3	11.3	14.6	16.1	15.7	13.6	10.7	6.5	4.8	69	48	55	49
Qpe	T-FR-012	2003017	8	303.636	11	26	51.948	-2.45	70	6.5	6.8	9.1	12.2	15.5	18.9	20.3	19.9	17.6	14.2	9.5	7.4	1.2	1.1	2.2	4.5	7.2	10.3	11.8	11.6	9.6	7.3	3.6	2.1	3.9	4	5.6	8.3	11.3	14.6	16.1	15.7	13.6	10.7	6.5	4.8	69	48	55	49
Qpe	T-FR-012	2004022	8	273.754	19	26	51.948	-2.45	70	6.5	6.8	9.1	12.2	15.5	18.9	20.3	19.9	17.6	14.2	9.5	7.4	1.2	1.1	2.2	4.5	7.2	10.3	11.8	11.6	9.6	7.3	3.6	2.1	3.9	4	5.6	8.3	11.3	14.6	16.1	15.7	13.6	10.7	6.5	4.8	69	48	55	49
Qpe	T-FR-012	2005027	8	321.429	14	26	51.948	-2.45	70	6.5	6.8	9.1	12.2	15.5	18.9	20.3	19.9	17.6	14.2	9.5	7.4	1.2	1.1	2.2	4.5	7.2	10.3	11.8	11.6	9.6	7.3	3.6	2.1	3.9	4	5.6	8.3	11.3	14.6	16.1	15.7	13.6	10.7	6.5	4.8	69	48	55	49
Qpe	T-FR-012	2006036	8	289.182	11	26	51.948	-2.45	70	6.5	6.8	9.1	12.2	15.5	18.9	20.3	19.9	17.6	14.2	9.5	7.4	1.2	1.1	2.2	4.5	7.2	10.3	11.8	11.6	9.6	7.3	3.6	2.1	3.9	4	5.6	8.3	11.3	14.6	16.1	15.7	13.6	10.7	6.5	4.8	69	48	55	49
Qpe	T-FR-012	2007037	8	294.548	14	26	51.948	-2.45	70	6.5	6.8	9.1	12.2	15.5	18.9	20.3	19.9	17.6	14.2	9.5	7.4	1.2	1.1	2.2	4.5	7.2	10.3	11.8	11.6	9.6	7.3	3.6	2.1	3.9	4	5.6	8.3	11.3	14.6	16.1	15.7	13.6	10.7	6.5	4.8	69	48	55	49
Qpe	T-FR-012	2008044	8	269.744	13	26	51.948	-2.45	70	6.5	6.8	9.1	12.2	15.5	18.9	20.3	19.9	17.6	14.2	9.5	7.4	1.2	1.1	2.2	4.5	7.2	10.3	11.8	11.6	9.6	7.3	3.6	2.1	3.9	4	5.6	8.3	11.3	14.6	16.1	15.7	13.6	10.7	6.5	4.8	69	48	55	49
Qpe	T-FR-012	2009054	8	276.714	21	26	51.948	-2.45	70	6.5	6.8	9.1	12.2	15.5	18.9	20.3	19.9	17.6	14.2	9.5	7.4	1.2	1.1	2.2	4.5	7.2	10.3	11.8	11.6	9.6	7.3	3.6	2.1	3.9	4	5.6	8.3	11.3	14.6	16.1	15.7	13.6	10.7	6.5	4.8	69	48	55	49
Qpe	T-FR-012	2010059	8	317.54	21	26	51.948	-2.45	70	6.5	6.8	9.1	12.2	15.5	18.9	20.3	19.9	17.6	14.2	9.5	7.4	1.2	1.1	2.2	4.5	7.2	10.3	11.8	11.6	9.6	7.3	3.6	2.1	3.9	4	5.6	8.3	11.3	14.6	16.1	15.7	13.6	10.7	6.5	4.8	69	48	55	49
Qpe	T-FR-012	4001002	8	197.406	16	260	56.071	9.597	25	2.7	3.3	5.4	9.2	14.7	18	19.3	19.1	15.9	11.6	7.3	4.3	-5.4	-5.4	-2	2.8	7.6	11	12.9	11.7	9.3	5.6	1.1	0.2	-1.3	-1	1.7	6	11.1	14.5	16.1	15.4	12.6	8.6	4.2	2.2	59	41	47	43
Qpe	T-FR-012	4001005	8	194.955	11	260	56.071	9.597	25	2.7	3.3	5.4	9.2	14.7	18	19.3	19.1	15.9	11.6	7.3	4.3	-5.4	-5.4	-2	2.8	7.6	11	12.9	11.7	9.3	5.6	1.1	0.2	-1.3	-1	1.7	6	11.1	14.5	16.1	15.4	12.6	8.6	4.2	2.2	59	41	47	43
Qpe	T-FR-012	4002020	8	197.381	21	260	56.071	9.597	25	2.7	3.3	5.4	9.2	14.7	18	19.3	19.1	15.9	11.6	7.3	4.3	-5.4	-5.4	-2	2.8	7.6	11	12.9	11.7	9.3	5.6	1.1	0.2	-1.3	-1	1.7	6	11.1	14.5	16.1	15.4	12.6	8.6	4.2	2.2	59	41	47	43
Qpe	T-FR-012	4003026	8	162.062	16	260	56.071	9.597	25	2.7	3.3	5.4	9.2	14.7	18	19.3	19.1	15.9	11.6	7.3	4.3	-5.4	-5.4	-2	2.8	7.6	11	12.9	11.7	9.3	5.6	1.1	0.2	-1.3	-1	1.7	6	11.1	14.5	16.1	15.4	12.6	8.6	4.2	2.2	59	41	47	43
Qpe	T-FR-012	4005045	8	187.385	13	260	56.071	9.597	25	2.7	3.3	5.4	9.2	14.7	18	19.3	19.1	15.9	11.6	7.3	4.3	-5.4	-5.4	-2	2.8	7.6	11	12.9	11.7	9.3	5.6	1.1	0.2	-1.3	-1	1.7	6	11.1	14.5	16.1	15.4	12.6	8.6	4.2	2.2	59	41	47	43
Qpe	T-FR-012	4006052	8	205.778	18	260	56.071	9.597	25	2.7	3.3	5.4	9.2	14.7	18	19.3	19.1	15.9	11.6	7.3	4.3	-5.4	-5.4	-2	2.8	7.6	11	12.9	11.7	9.3	5.6	1.1	0.2	-1.3	-1	1.7	6	11.1	14.5	16.1	15.4	12.6	8.6	4.2	2.2	59	41	47	43
Qpe	T-FR-012	4007063	8	153.067	15	260	56.071	9.597	25	2.7	3.3	5.4	9.2	14.7	18	19.3	19.1	15.9	11.6	7.3	4.3	-5.4	-5.4	-2	2.8	7.6	11	12.9	11.7	9.3	5.6	1.1	0.2	-1.3	-1	1.7	6	11.1	14.5	16.1	15.4	12.6	8.6	4.2	2.2	59	41	47	43
Qpe	T-FR-012	4008075	8	196.735	17	260	56.071	9.597	25	2.7	3.3	5.4	9.2	14.7	18	19.3	19.1	15.9	11.6	7.3	4.3	-5.4	-5.4	-2	2.8	7.6	11	12.9	11.7	9.3	5.6	1.1	0.2	-1.3	-1	1.7	6	11.1	14.5	16.1	15.4	12.6	8.6	4.2	2.2	59	41	47	43
Qpe	T-FR-012	4008079	8	221.719	16	260	56.071	9.597	25	2.7	3.3	5.4	9.2	14.7	18	19.3	19.1	15.9	11.6	7.3	4.3	-5.4	-5.4	-2	2.8	7.6	11	12.9	11.7	9.3	5.6	1.1	0.2	-1.3	-1	1.7	6	11.1	14.5	16.1	15.4	12.6	8.6	4.2	2.2	59	41	47	43
Qpe	T-FR-012	4002013	8	254.947	19	263	53.707	9.762	10	2	3.1	6.7	11.8	17	20.3	21.5	21.4	18.6	13	7.3	3.7	-2.6	-2.5	-0.3	2.7	6.6	9.9	11.9	11.5	9	5.8	2.3	-0.8	-0.3	0.3	3.2	7.3	11.8	15.1	16.7	16.4	13.8	9.4	4.8	1.5	62	44	52	47
Qpe	T-FR-012	4002015	8	195.658	19	263	53.707	9.762	10	2	3.1	6.7	11.8	17	20.3	21.5	21.4	18.6	13	7.3	3.7	-2.6	-2.5	-0.3	2.7	6.6	9.9	11.9	11.5	9	5.8	2.3	-0.8	-0.3	0.3	3.2	7.3	11.8	15.1	16.7	16.4	13.8	9.4	4.8	1.5	62	44	52	47
Qpe	T-FR-012	4003022	8	205.324	17	263	53.707	9.762	10	2	3.1	6.7	11.8	17	20.3	21.5	21.4	18.6	13	7.3	3.7	-2.6	-2.5	-0.3	2.7	6.6	9.9	11.9	11.5	9	5.8	2.3	-0.8	-0.3	0.3	3.2	7.3	11.8	15.1	16.7	16.4	13.8	9.4	4.8	1.5	62	44	52	47
Qpe	T-FR-012	4003025	8	223.088	17	263	53.707	9.762	10	2	3.1	6.7	11.8	17	20.3	21.5	21.4	18.6	13	7.3	3.7	-2.6	-2.5	-0.3	2.7	6.6	9.9	11.9	11.5	9	5.8	2.3	-0.8	-0.3	0.3	3.2	7.3	11.8	15.1	16.7	16.4	13.8	9.4	4.8	1.5	62	44	52	47
Qpe	T-FR-012	4004040	8	181.906	16	263	53.707	9.762	10	2	3.1	6.7	11.8	17	20.3	21.5	21.4	18.6	13	7.3	3.7	-2.6	-2.5	-0.3	2.7	6.6	9.9	11.9	11.5	9	5.8	2.3	-0.8	-0.3	0.3	3.2	7.3	11.8	15.1	16.7	16.4	13.8	9.4	4.8	1.5	62	44	52	47
Qpe	T-FR-012	4006055	8	182.531	16	263	53.707	9.762	10	2	3.1	6.7	11.8	17	20.3	21.5	21.4	18.6	13	7.3	3.7	-2.6	-2.5	-0.3	2.7	6.6	9.9	11.9	11.5	9	5.8	2.3	-0.8	-0.3	0.3	3.2	7.3	11.8	15.1	16.7	16.4	13.8	9.4	4.8	1.5	62	44	52	47
Qpe	T-FR-012	4007061	8	177.944	18	263	53.707	9.762	10	2	3.1	6.7	11.8	17	20.3	21.5	21.4	18.6	13	7.3	3.7	-2.6	-2.5	-0.3	2.7	6.6	9.9	11.9	11.5	9	5.8	2.3	-0.8	-0.3	0.3	3.2	7.3	11.8	15.1	16.7	16.4	13.8	9.4	4.8	1.5	62	44	52	47
Qpe	T-FR-012	4008074	8	164.531	16	263	53.707	9.762	10	2	3.1	6.7	11.8	17	20.3	21.5	21.4	18.6	13	7.3	3.7	-2.6	-2.5	-0.3	2.7	6.6	9.9	11.9	11.5	9	5.8	2.3	-0.8	-0.3	0.3	3.2	7.3	11.8	15.1	16.7	16.4	13.8	9.4	4.8	1.5	62	44	52	47
Qpe	T-FR-012	4009092	8	253.615	13	263	53.707	9.762	10	2	3.1	6.7	11.8	17	20.3	21.5	21.4	18.6	13	7.3	3.7	-2.6	-2.5	-0.3	2.7	6.6	9.9	11.9	11.5	9	5.8	2.3	-0.8	-0.3	0.3	3.2	7.3	11.8	15.1	16.7	16.4	13.8	9.4	4.8	1.5	62	44	52	47
Qpe	T-FR-012	4001009	8	157.679	14	277	40.917	31.667	1200	2.1	3.8	8.1	12.7	17.1	20.7	22.8	23	20.4	14.9	10.3	4.2	-4.5	-3.4	-1.1	2.7	6.5	9.2	11.4	11.1	8.7	5	1.6	-2	-1.2	0.2	3.5	7.7	11.8	14.9	17.1	17	14.6	10	6	1.1	87	69	68	67
Qpe	T-FR-012	4002014	8	221.605	19	277	40.917	31.667	1200	2.1	3.8	8.1	12.7	17.1	20.7	22.8	23	20.4	14.9	10.3	4.2	-4.5	-3.4	-1.1	2.7	6.5	9.2	11.4	11.1	8.7	5	1.6	-2	-1.2	0.2	3.5	7.7	11.8	14.9	17.1	17	14.6	10	6	1.1	87	69	68	67
Qpe	T-FR-012	4003029	8	195.528	18	277	40.917	31.667	1200	2.1	3.8	8.1	12.7	17.1	20.7	22.8	23	20.4	14.9	10.3	4.2	-4.5	-3.4	-1.1	2.7	6.5	9.2	11.4	11.1	8.7	5	1.6	-2	-1.2	0.2	3.5	7.7	11.8	14.9	17.1	17	14.6	10	6	1.1	87	69	68	67
Qpe	T-FR-012	4005042	8	187.6	15	277	40.917	31.667	1200	2.1	3.8	8.1	12.7	17.1	20.7	22.8	23	20.4	14.9	10.3	4.2	-4.5	-3.4	-1.1	2.7	6.5	9.2	11.4	11.1	8.7	5	1.6	-2	-1.2	0.2	3.5	7.7	11.8	14.9	17.1	17	14.6	10	6	1.1	87	69	68	67
Qpe	T-FR-012	4006056	8	195.5	14	277	40.917	31.667	1200	2.1	3.8	8.1	12.7	17.1	20.7	22.8	23	20.4	14.9	10.3	4.2	-4.5	-3.4	-1.1	2.7	6.5	9.2	11.4	11.1	8.7	5	1.6	-2	-1.2	0.2	3.5	7.7	11.8	14.9	17.1	17	14.6	10	6	1.1	87	69	68	67
Qpe	T-FR-012	4007062	8	212.792	12	277	40.917	31.667	1200	2.1	3.8	8.1	12.7	17.1	20.7	22.8	23	20.4	14.9	10.3	4.2	-4.5	-3.4	-1.1	2.7	6.5	9.2	11.4	11.1	8.7	5	1.6	-2	-1.2	0.2	3.5	7.7	11.8	14.9	17.1	17	14.6	10	6	1.1	87	69	68	67
Qpe	T-FR-012	4008071	8	213.5	17	277	40.917	31.667	1200	2.1	3.8	8.1	12.7	17.1	20.7	22.8	23	20.4	14.9	10.3	4.2	-4.5	-3.4	-1.1	2.7	6.5	9.2	11.4	11.1	8.7	5	1.6	-2	-1.2	0.2	3.5	7.7	11.8	14.9	17.1	17	14.6	10	6	1.1	87	69	68	67
Qpe	T-FR-012	4009083	8	288.6	15	277	40.917	31.667	1200	2.1	3.8	8.1	12.7	17.1	20.7	22.8	23	20.4	14.9	10.3	4.2	-4.5	-3.4	-1.1	2.7	6.5	9.2	11.4	11.1	8.7	5	1.6	-2	-1.2	0.2	3.5	7.7	11.8	14.9	17.1	17	14.6	10	6	1.1	87	69	68	67
Qpe	T-FR-012	4009092	8	223.4	15	277	40.917	31.667	1200	2.1	3.8	8.1	12.7	17.1	20.7	22.8	23	20.4	14.9	10.3	4.2	-4.5	-3.4	-1.1	2.7	6.5	9.2	11.4	11.1	8.7	5	1.6	-2	-1.2	0.2	3.5	7.7	11.8	14.9	17.1	17	14.6	10	6	1.1	87	69	68	67
Qpe	T-FR-012	4001001	8	195.5	19	31	52.8327	10.317	110	2	3.1	7.1	12.2	17.7	21	22.3	22	18.5	13	7	3.3	-3.1	-3	-0.8	2.4	6.3	9.6	11.7	11.2	8.5	5.2	1.8	-1.6	-0.6	0	3.1	7.3	12	15.3	17	16.6	13.5	9.1	4.4	0.8	53	42	47	50
Qpe	T-FR-012	4001008	8	237.367	15	31	52.8327	10.317	110	2	3.1	7.1	12.2	17.7	21	22.3	22	18.5	13	7	3.3	-3.1	-3	-0.8	2.4	6.3	9.6	11.7	11.2	8.5	5.2	1.8	-1.6	-0.6	0	3.1	7.3	12	15.3	17	16.6	13.5	9.1	4.4	0.8	53	42	47	50
Qpe	T-FR-012	4003025	8	246.132	19	31	52.8327	10.317	110	2	3.1	7.1	12.2	17.7	21	22.3	22	18.5	13	7	3.3	-3.1	-3	-0.8	2.4	6.3	9.6	11.7	11.2	8.5	5.2	1.8	-1.6	-0.6	0	3.1	7.3	12	15.3	17	16.6	13.5	9.1	4.4	0.8	53	42	47	50
Qpe	T-FR-012	4003030	8	224.765	17	31	52.8327	10.317	110	2	3.1	7.1	12.2	17.7	21	22.3	22	18.5	13	7	3.3	-3.1	-3	-0.8	2.4	6.3	9.6	11.7	11.2	8.5	5.2	1.8	-1.6	-0.6	0	3.1	7.3	12	15.3	17	16.6	13.5	9.1	4.4	0.8	53	42	47	50
Qpe	T-FR-012	4005044	8	263.725	20	31	52.8327	10.317	110	2	3.1	7.1	12.2	17.7	21	22.3	22	18.5	13	7	3.3	-3.1	-3	-0.8	2.4	6.3	9.6	11.7	11.2	8.5	5.2	1.8	-1.6	-0.6	0	3.1	7.3	12	15.3	17	16.6	13.5	9.1	4.4	0.8	53	42	47	50
Qpe	T-FR-012	4006057	8	203.619	21	31	52.8327	10.317	110	2	3.1	7.1	12.2	17.7	21	22.3	22	18.5	13	7	3.3	-3.1	-3	-0.8	2.4	6.3	9.6	11.7	11.2	8.5	5.2	1.8	-1.6	-0.6	0	3.1	7.3	12	15.3	17	16.6	13.5	9.1	4.4	0.8	53	42	47	50
Qpe	T-FR-012	4006059	8	229.6	5	31	52.8327	10.317	110	2	3.1	7.1	12.2	17.7	21	22.3	22	18.5	13	7	3.3	-3.1	-3	-0.8	2.4	6.3	9.6	11.7	11.2	8.5	5.2	1.8	-1.6	-0.6	0	3.1	7.3	12	15.3	17	16.6	13.5	9.1	4.4	0.8	53	42	47	50
Qpe	T-FR-012	4007065	8	225.5	23	31	52.8327	10.317	110	2	3.1	7.1	12.2	17.7	21	22.3	22	18.5	13	7	3.3	-3.1	-3	-0.8	2.4	6.3	9.6	11.7	11.2	8.5	5.2	1.8	-1.6	-0.6	0	3.1	7.3	12	15.3	17	16.6	13.5	9.1	4.4	0.8	53	42	47	50
Qpe	T-FR-012	4008080	8	217.688	16	31	52.8327	10.317	110	2	3.1	7.1	12.2	17.7	21	22.3	22	18.5	13	7	3.3	-3.1	-3	-0.8	2.4	6.3	9.6	11.7	11.2	8.5	5.2	1.8	-1.6	-0.6	0	3.1	7.3	12	15.3	17	16.6	13.5	9.1	4.4	0.8	53	42	47	50
Qpe	T-FR-012	4009091	8	183.5	1	31	52.8327	10.317	110	2	3.1	7.1	12.2	17.7	21	22.3	22	18.5	13	7	3.3	-3.1	-3	-0.8	2.4	6.3	9.6	11.7	11.2	8.5	5.2	1.8	-1.6	-0.6	0	3.1	7.3	12	15.3	17	16.6	13.5	9.1	4.4	0.8	53	42	47	50
Qpe	T-FR-012	4002013	8	202.647	17	33	51.1827	17.9313	210	-0.2	1.5	6.7	13	18.2	21.7	22.8	22.6	18.6	13.6	6.9	2.1	-5.7	-4.5	-0.9	3	7.4	10.9	12	11.6	8.8	4.7	1	-3.1	-3	-1.5	2.9	8	12.8	16.3	17.4	17.1	13.7	9.1	4	-0.5	31	28	29	37
Qpe	T-FR-012	4002017	8	183.423	13	33	51.1827	17.9313	210	-0.2	1.5	6.7	13	18.2	21.7	22.8	22.6	18.6	13.6	6.9	2.1	-5.7	-4.5	-0.9	3	7.4	10.9	12	11.6	8.8	4.7	1	-3.1	-3	-1.5	2.9	8	12.8	16.3	17.4	17.1	13.7	9.1	4	-0.5	31	28	29	37
Qpe	T-FR-012	4004035	8	220.941	17	33	51.1827	17.9313	210	-0.2	1.5	6.7	13	18.2	21.7	22.8	22.6	18.6	13.6	6.9	2.1	-5.7	-4.5	-0.9	3	7.4	10.9	12	11.6	8.8	4.7	1	-3.1	-3	-1.5	2.9	8	12.8	16.3	17.4	17.1	13.7	9.1	4	-0.5	31	28	29	37
Qpe	T-FR-012	4004036	8	218.545	22	33	51.1827	17.9313	210	-0.2	1.5	6.7	13	18.2	21.7	22.8	22.6	18.6	13.6	6.9	2.1	-5.7	-4.5	-0.9	3	7.4	10.9	12	11.6	8.8	4.7	1	-3.1	-3	-1.5	2.9	8	12.8	16.3	17.4	17.1	13.7	9.1	4	-0.5	31	28	29	37
Qpe	T-FR-012	4005049	8	220.441	17	33	51.1827	17.9313	210	-0.2	1.5	6.7	13	18.2	21.7	22.8	22.6	18.6	13.6	6.9	2.1	-5.7	-4.5	-0.9	3	7.4	10.9	12	11.6	8.8	4.7	1	-3.1	-3	-1.5	2.9	8	12.8	16.3	17.4	17.1	13.7	9.1	4	-0.5	31	28	29	37
Qpe	T-FR-012	4005050	8	209.588	17	33	51.1827	17.9313	210	-0.2	1.5	6.7	13	18.2	21.7	22.8	22.6	18.6	13.6	6.9	2.1	-5.7	-4.5	-0.9	3	7.4	10.9	12	11.6	8.8	4.7	1	-3.1	-3	-1.5	2.9	8	12.8	16.3	17.4	17.1	13.7	9.1	4	-0.5	31	28	29	37
Qpe	T-FR-012	4008075	8	232.607	14	33	51.1827	17.9313	210	-0.2	1.5	6.7	13	18.2	21.7	22.8	22.6	18.6	13.6	6.9	2.1	-5.7	-4.5	-0.9	3	7.4	10.9	12	11.6	8.8	4.7	1	-3.1	-3	-1.5	2.9	8	12.8	16.3	17.4	17.1	13.7	9.1	4	-0.5	31	28	29	37
Qpe	T-FR-012	4008076	8	195.675	20	33	51.1827	17.9313	210	-0.2	1.5	6.7	13	18.2	21.7	22.8	22.6	18.6	13.6	6.9	2.1	-5.7	-4.5	-0.9	3	7.4	10.9	12	11.6	8.8	4.7	1	-3.1	-3	-1.5	2.9	8	12.8	16.3	17.4	17.1	13.7	9.1	4	-0.5	31	28	29	37
Qpe	T-FR-012	4009082	8	248.812	8	33	51.1827	17.9313	210	-0.2	1.5	6.7	13	18.2	21.7	22.8	22.6	18.6	13.6	6.9	2.1	-5.7	-4.5	-0.9	3	7.4	10.9	12	11.6	8.8	4.7	1	-3.1	-3	-1.5	2.9	8	12.8	16.3	17.4	17.1	13.7	9.1	4	-0.5	31	28	29	37
Qpe	T-FR-012	4009091	8	262.588	17	33	51.1827	17.9313	210	-0.2	1.5	6.7	13	18.2	21.7	22.8	22.6	18.6	13.6	6.9	2.1	-5.7	-4.5	-0.9	3	7.4	10.9	12	11.6	8.8	4.7	1	-3.1	-3	-1.5	2.9	8	12.8	16.3	17.4	17.1	13.7	9.1	4	-0.5	31	28	29	37
Qpe	T-FR-012	1001002	8	379.245	48	4	47.8091	0.390286	156.75	6.2	7.6	11.4	14.8	18.1	21.9	24.1	23.6	20.9	15.8	10.1	6.5	0.1	0.6	2.2	4.7	7.6	10.8	12.6	12.3	10.3	6.8	3.5	0.9	3.1	4.1	6.8	9.8	12.8	16.3	18.3	17.9	15.6	11.3	6.8	3.7	68	61	57	53
Qpe	T-FR-012	1001003	8	353.583	18	4	47.8091	0.390286	156.75	6.2	7.6	11.4	14.8	18.1	21.9	24.1	23.6	20.9	15.8	10.1	6.5	0.1	0.6	2.2	4.7	7.6	10.8	12.6	12.3	10.3	6.8	3.5	0.9	3.1	4.1	6.8	9.8	12.8	16.3	18.3	17.9	15.6	11.3	6.8	3.7	68	61	57	53
Qpe	T-FR-012	1001004	8	351.941	21	4	47.8091	0.390286	156.75	6.2	7.6	11.4	14.8	18.1	21.9	24.1	23.6	20.9	15.8	10.1	6.5	0.1	0.6	2.2	4.7	7.6	10.8	12.6	12.3	10.3	6.8	3.5	0.9	3.1	4.1	6.8	9.8	12.8	16.3	18.3	17.9	15.6	11.3	6.8	3.7	68	61	57	53
Qpe	T-FR-012	1001007	8	327.054	19	4	47.8091	0.390286	156.75	6.2	7.6	11.4	14.8	18.1	21.9	24.1	23.6	20.9	15.8	10.1	6.5	0.1	0.6	2.2	4.7	7.6	10.8	12.6	12.3	10.3	6.8	3.5	0.9	3.1	4.1	6.8	9.8	12.8	16.3	18.3	17.9	15.6	11.3	6.8	3.7	68	61	57	53
Qpe	T-FR-012	1002009	8	357.462	21	4	47.8091	0.390286	156.75	6.2	7.6	11.4	14.8	18.1	21.9	24.1	23.6	20.9	15.8	10.1	6.5	0.1	0.6	2.2	4.7	7.6	10.8	12.6	12.3	10.3	6.8	3.5	0.9	3.1	4.1	6.8	9.8	12.8	16.3	18.3	17.9	15.6	11.3	6.8	3.7	68	61	57	53
Qpe	T-FR-012	1002011	8	296.301	17	4	47.8091	0.390286	156.75	6.2	7.6	11.4	14.8	18.1	21.9	24.1	23.6	20.9	15.8	10.1	6.5	0.1	0.6	2.2	4.7	7.6	10.8	12.6	12.3	10.3	6.8	3.5	0.9	3.1	4.1	6.8	9.8	12.8	16.3	18.3	17.9	15.6	11.3	6.8	3.7	68	61	57	53
Qpe	T-FR-012	1002012	8	267.249	23	4	47.8091	0.390286	156.75	6.2	7.6	11.4	14.8	18.1	21.9	24.1	23.6	20.9	15.8	10.1	6.5	0.1	0.6	2.2	4.7	7.6	10.8	12.6	12.3	10.3	6.8	3.5	0.9	3.1	4.1	6.8	9.8	12.8	16.3	18.3	17.9	15.6	11.3	6.8	3.7	68	61	57	53
Qpe	T-FR-012	1003013	8	326.316	44	4	47.8091	0.390286	156.75	6.2	7.6	11.4	14.8	18.1	21.9	24.1	23.6	20.9	15.8	10.1	6.5	0.1	0.6	2.2	4.7	7.6	10.8	12.6	12.3	10.3	6.8	3.5	0.9	3.1	4.1	6.8	9.8	12.8	16.3	18.3	17.9	15.6	11.3	6.8	3.7	68	61	57	53
Qpe	T-FR-012	1003014	8	310.996	35	4	47.8091	0.390286	156.75	6.2	7.6	11.4	14.8	18.1	21.9	24.1	23.6	20.9	15.8	10.1	6.5	0.1	0.6	2.2	4.7	7.6	10.8	12.6	12.3	10.3	6.8	3.5	0.9	3.1	4.1	6.8	9.8	12.8	16.3	18.3	17.9	15.6	11.3	6.8	3.7	68	61	57	53
Qpe	T-FR-012	1003018	8	298.013	18	4	47.8091	0.390286	156.75	6.2	7.6	11.4	14.8	18.1	21.9	24.1	23.6	20.9	15.8	10.1	6.5	0.1	0.6	2.2	4.7	7.6	10.8	12.6	12.3	10.3	6.8	3.5	0.9	3.1	4.1	6.8	9.8	12.8	16.3	18.3	17.9	15.6	11.3	6.8	3.7	68	61	57	53
Qpe	T-FR-012	1004019	8	341.749	21	4	47.8091	0.390286	156.75	6.2	7.6	11.4	14.8	18.1	21.9	24.1	23.6	20.9	15.8	10.1	6.5	0.1	0.6	2.2	4.7	7.6	10.8	12.6	12.3	10.3	6.8	3.5	0.9	3.1	4.1	6.8	9.8	12.8	16.3	18.3	17.9	15.6	11.3	6.8	3.7	68	61	57	53
Qpe	T-FR-012	1004021	8	324.119	38	4	47.8091	0.390286	156.75	6.2	7.6	11.4	14.8	18.1	21.9	24.1	23.6	20.9	15.8	10.1	6.5	0.1	0.6	2.2	4.7	7.6	10.8	12.6	12.3	10.3	6.8	3.5	0.9	3.1	4.1	6.8	9.8	12.8	16.3	18.3	17.9	15.6	11.3	6.8	3.7	68	61	57	53
Qpe	T-FR-012	1004024	8	280.075	22	4	47.8091	0.390286	156.75	6.2	7.6	11.4	14.8	18.1	21.9	24.1	23.6	20.9	15.8	10.1	6.5	0.1	0.6	2.2	4.7	7.6	10.8	12.6	12.3	10.3	6.8	3.5	0.9	3.1	4.1	6.8	9.8	12.8	16.3	18.3	17.9	15.6	11.3	6.8	3.7	68	61	57	53
Qpe	T-FR-012	1005026	8	364.129	23	4	47.8091	0.390286	156.75	6.2	7.6	11.4	14.8	18.1	21.9	24.1	23.6	20.9	15.8	10.1	6.5	0.1	0.6	2.2	4.7	7.6	10.8	12.6	12.3	10.3	6.8	3.5	0.9	3.1	4.1	6.8	9.8	12.8	16.3	18.3	17.9	15.6	11.3	6.8	3.7	68	61	57	53
Qpe	T-FR-012	1005027	8	376.689	24	4	47.8091	0.390286	156.75	6.2	7.6	11.4	14.8	18.1	21.9	24.1	23.6	20.9	15.8	10.1	6.5	0.1	0.6	2.2	4.7	7.6	10.8	12.6	12.3	10.3	6.8	3.5	0.9	3.1	4.1	6.8	9.8	12.8	16.3	18.3	17.9	15.6	11.3	6.8	3.7	68	61	57	53
Qpe	T-FR-012	1005028	8	345.347	23	4	47.8091	0.390286	156.75	6.2	7.6	11.4	14.8	18.1	21.9	24.1	23.6	20.9	15.8	10.1	6.5	0.1	0.6	2.2	4.7	7.6	10.8	12.6	12.3	10.3	6.8	3.5	0.9	3.1	4.1	6.8	9.8	12.8	16.3	18.3	17.9	15.6	11.3	6.8	3.7	68	61	57	53
Qpe	T-FR-012	1005030	8	357.184	22	4	47.8091	0.390286	156.75	6.2	7.6	11.4	14.8	18.1	21.9	24.1	23.6	20.9	15.8	10.1	6.5	0.1	0.6	2.2	4.7	7.6	10.8	12.6	12.3	10.3	6.8	3.5	0.9	3.1	4.1	6.8	9.8	12.8	16.3	18.3	17.9	15.6	11.3	6.8	3.7	68	61	57	53
Qpe	T-FR-012	2001001	8	299.125	8	4	47.8091	0.390286	156.75	6.2	7.6	11.4	14.8	18.1	21.9	24.1	23.6	20.9	15.8	10.1	6.5	0.1	0.6	2.2	4.7	7.6	10.8	12.6	12.3	10.3	6.8	3.5	0.9	3.1	4.1	6.8	9.8	12.8	16.3	18.3	17.9	15.6	11.3	6.8	3.7	68	61	57	53
Qpe	T-FR-012	2001002	8	290.485	11	4	47.8091	0.390286	156.75	6.2	7.6	11.4	14.8	18.1	21.9	24.1	23.6	20.9	15.8	10.1	6.5	0.1	0.6	2.2	4.7	7.6	10.8	12.6	12.3	10.3	6.8	3.5	0.9	3.1	4.1	6.8	9.8	12.8	16.3	18.3	17.9	15.6	11.3	6.8	3.7	68	61	57	53
Qpe	T-FR-012	2001005	8	201.4	5	4	47.8091	0.390286	156.75	6.2	7.6	11.4	14.8	18.1	21.9	24.1	23.6	20.9	15.8	10.1	6.5	0.1	0.6	2.2	4.7	7.6	10.8	12.6	12.3	10.3	6.8	3.5	0.9	3.1	4.1	6.8	9.8	12.8	16.3	18.3	17.9	15.6	11.3	6.8	3.7	68	61	57	53
Qpe	T-FR-012	2001006	8	304.711	15	4	47.8091	0.390286	156.75	6.2	7.6	11.4	14.8	18.1	21.9	24.1	23.6	20.9	15.8	10.1	6.5	0.1	0.6	2.2	4.7	7.6	10.8	12.6	12.3	10.3	6.8	3.5	0.9	3.1	4.1	6.8	9.8	12.8	16.3	18.3	17.9	15.6	11.3	6.8	3.7	68	61	57	53
Qpe	T-FR-012	2002010	8	267.5	6	4	47.8091	0.390286	156.75	6.2	7.6	11.4	14.8	18.1	21.9	24.1	23.6	20.9	15.8	10.1	6.5	0.1	0.6	2.2	4.7	7.6	10.8	12.6	12.3	10.3	6.8	3.5	0.9	3.1	4.1	6.8	9.8	12.8	16.3	18.3	17.9	15.6	11.3	6.8	3.7	68	61	57	53
Qpe	T-FR-012	2002011	8	207.25	4	4	47.8091	0.390286	156.75	6.2	7.6	11.4	14.8	18.1	21.9	24.1	23.6	20.9	15.8	10.1	6.5	0.1	0.6	2.2	4.7	7.6	10.8	12.6	12.3	10.3	6.8	3.5	0.9	3.1	4.1	6.8	9.8	12.8	16.3	18.3	17.9	15.6	11.3	6.8	3.7	68	61	57	53
Qpe	T-FR-012	2003015	8	278.444	9	4	47.8091	0.390286	156.75	6.2	7.6	11.4	14.8	18.1	21.9	24.1	23.6	20.9	15.8	10.1	6.5	0.1	0.6	2.2	4.7	7.6	10.8	12.6	12.3	10.3	6.8	3.5	0.9	3.1	4.1	6.8	9.8	12.8	16.3	18.3	17.9	15.6	11.3	6.8	3.7	68	61	57	53
Qpe	T-FR-012	2003018	8	314.909	11	4	47.8091	0.390286	156.75	6.2	7.6	11.4	14.8	18.1	21.9	24.1	23.6	20.9	15.8	10.1	6.5	0.1	0.6	2.2	4.7	7.6	10.8	12.6	12.3	10.3	6.8	3.5	0.9	3.1	4.1	6.8	9.8	12.8	16.3	18.3	17.9	15.6	11.3	6.8	3.7	68	61	57	53
Qpe	T-FR-012	2004020	8	302.825	19	4	47.8091	0.390286	156.75	6.2	7.6	11.4	14.8	18.1	21.9	24.1	23.6	20.9	15.8	10.1	6.5	0.1	0.6	2.2	4.7	7.6	10.8	12.6	12.3	10.3	6.8	3.5	0.9	3.1	4.1	6.8	9.8	12.8	16.3	18.3	17.9	15.6	11.3	6.8	3.7	68	61	57	53
Qpe	T-FR-012	2004022	8	345.231	13	4	47.8091	0.390286	156.75	6.2	7.6	11.4	14.8	18.1	21.9	24.1	23.6	20.9	15.8	10.1	6.5	0.1	0.6	2.2	4.7	7.6	10.8	12.6	12.3	10.3	6.8	3.5	0.9	3.1	4.1	6.8	9.8	12.8	16.3	18.3	17.9	15.6	11.3	6.8	3.7	68	61	57	53
Qpe	T-FR-012	2004024	8	309.137	17	4	47.8091	0.390286	156.75	6.2	7.6	11.4	14.8	18.1	21.9	24.1	23.6	20.9	15.8	10.1	6.5	0.1	0.6	2.2	4.7	7.6	10.8	12.6	12.3	10.3	6.8	3.5	0.9	3.1	4.1	6.8	9.8	12.8	16.3	18.3	17.9	15.6	11.3	6.8	3.7	68	61	57	53
Qpe	T-FR-012	2005026	8	338.412	17	4	47.8091	0.390286	156.75	6.2	7.6	11.4	14.8	18.1	21.9	24.1	23.6	20.9	15.8	10.1	6.5	0.1	0.6	2.2	4.7	7.6	10.8	12.6	12.3	10.3	6.8	3.5	0.9	3.1	4.1	6.8	9.8	12.8	16.3	18.3	17.9	15.6	11.3	6.8	3.7	68	61	57	53
Qpe	T-FR-012	2005027	8	307.333	14	4	47.8091	0.390286	156.75	6.2	7.6	11.4	14.8	18.1	21.9	24.1	23.6	20.9	15.8	10.1	6.5	0.1	0.6	2.2	4.7	7.6	10.8	12.6	12.3	10.3	6.8	3.5	0.9	3.1	4.1	6.8	9.8	12.8	16.3	18.3	17.9	15.6	11.3	6.8	3.7	68	61	57	53
Qpe	T-FR-012	2005028	8	290.314	17	4	47.8091	0.390286	156.75	6.2	7.6	11.4	14.8	18.1	21.9	24.1	23.6	20.9	15.8	10.1	6.5	0.1	0.6	2.2	4.7	7.6	10.8	12.6	12.3	10.3	6.8	3.5	0.9	3.1	4.1	6.8	9.8	12.8	16.3	18.3	17.9	15.6	11.3	6.8	3.7	68	61	57	53
Qpe	T-FR-012	2006031	8	323.519	9	4	47.8091	0.390286	156.75	6.2	7.6	11.4	14.8	18.1	21.9	24.1	23.6	20.9	15.8	10.1	6.5	0.1	0.6	2.2	4.7	7.6	10.8	12.6	12.3	10.3	6.8	3.5	0.9	3.1	4.1	6.8	9.8	12.8	16.3	18.3	17.9	15.6	11.3	6.8	3.7	68	61	57	53
Qpe	T-FR-012	2006034	8	288.872	13	4	47.8091	0.390286	156.75	6.2	7.6	11.4	14.8	18.1	21.9	24.1	23.6	20.9	15.8	10.1	6.5	0.1	0.6	2.2	4.7	7.6	10.8	12.6	12.3	10.3	6.8	3.5	0.9	3.1	4.1	6.8	9.8	12.8	16.3	18.3	17.9	15.6	11.3	6.8	3.7	68	61	57	53
Qpe	T-FR-012	2007039	8	326.75	12	4	47.8091	0.390286	156.75	6.2	7.6	11.4	14.8	18.1	21.9	24.1	23.6	20.9	15.8	10.1	6.5	0.1	0.6	2.2	4.7	7.6	10.8	12.6	12.3	10.3	6.8	3.5	0.9	3.1	4.1	6.8	9.8	12.8	16.3	18.3	17.9	15.6	11.3	6.8	3.7	68	61	57	53
Qpe	T-FR-012	2007040	8	298.685	18	4	47.8091	0.390286	156.75	6.2	7.6	11.4	14.8	18.1	21.9	24.1	23.6	20.9	15.8	10.1	6.5	0.1	0.6	2.2	4.7	7.6	10.8	12.6	12.3	10.3	6.8	3.5	0.9	3.1	4.1	6.8	9.8	12.8	16.3	18.3	17.9	15.6	11.3	6.8	3.7	68	61	57	53
Qpe	T-FR-012	2008044	8	264.946	31	4	47.8091	0.390286	156.75	6.2	7.6	11.4	14.8	18.1	21.9	24.1	23.6	20.9	15.8	10.1	6.5	0.1	0.6	2.2	4.7	7.6	10.8	12.6	12.3	10.3	6.8	3.5	0.9	3.1	4.1	6.8	9.8	12.8	16.3	18.3	17.9	15.6	11.3	6.8	3.7	68	61	57	53
Qpe	T-FR-012	2008048	8	290.354	16	4	47.8091	0.390286	156.75	6.2	7.6	11.4	14.8	18.1	21.9	24.1	23.6	20.9	15.8	10.1	6.5	0.1	0.6	2.2	4.7	7.6	10.8	12.6	12.3	10.3	6.8	3.5	0.9	3.1	4.1	6.8	9.8	12.8	16.3	18.3	17.9	15.6	11.3	6.8	3.7	68	61	57	53
Qpe	T-FR-012	2009051	8	284.84	25	4	47.8091	0.390286	156.75	6.2	7.6	11.4	14.8	18.1	21.9	24.1	23.6	20.9	15.8	10.1	6.5	0.1	0.6	2.2	4.7	7.6	10.8	12.6	12.3	10.3	6.8	3.5	0.9	3.1	4.1	6.8	9.8	12.8	16.3	18.3	17.9	15.6	11.3	6.8	3.7	68	61	57	53
Qpe	T-FR-012	2009052	8	301.907	18	4	47.8091	0.390286	156.75	6.2	7.6	11.4	14.8	18.1	21.9	24.1	23.6	20.9	15.8	10.1	6.5	0.1	0.6	2.2	4.7	7.6	10.8	12.6	12.3	10.3	6.8	3.5	0.9	3.1	4.1	6.8	9.8	12.8	16.3	18.3	17.9	15.6	11.3	6.8	3.7	68	61	57	53
Qpe	T-FR-012	2010055	8	321.708	16	4	47.8091	0.390286	156.75	6.2	7.6	11.4	14.8	18.1	21.9	24.1	23.6	20.9	15.8	10.1	6.5	0.1	0.6	2.2	4.7	7.6	10.8	12.6	12.3	10.3	6.8	3.5	0.9	3.1	4.1	6.8	9.8	12.8	16.3	18.3	17.9	15.6	11.3	6.8	3.7	68	61	57	53
Qpe	T-FR-012	2010058	8	308.022	15	4	47.8091	0.390286	156.75	6.2	7.6	11.4	14.8	18.1	21.9	24.1	23.6	20.9	15.8	10.1	6.5	0.1	0.6	2.2	4.7	7.6	10.8	12.6	12.3	10.3	6.8	3.5	0.9	3.1	4.1	6.8	9.8	12.8	16.3	18.3	17.9	15.6	11.3	6.8	3.7	68	61	57	53
Qpe	T-FR-012	2010059	8	311.242	33	4	47.8091	0.390286	156.75	6.2	7.6	11.4	14.8	18.1	21.9	24.1	23.6	20.9	15.8	10.1	6.5	0.1	0.6	2.2	4.7	7.6	10.8	12.6	12.3	10.3	6.8	3.5	0.9	3.1	4.1	6.8	9.8	12.8	16.3	18.3	17.9	15.6	11.3	6.8	3.7	68	61	57	53
Qpe	T-FR-012	4001009	8	215	18	4	47.8091	0.390286	156.75	6.2	7.6	11.4	14.8	18.1	21.9	24.1	23.6	20.9	15.8	10.1	6.5	0.1	0.6	2.2	4.7	7.6	10.8	12.6	12.3	10.3	6.8	3.5	0.9	3.1	4.1	6.8	9.8	12.8	16.3	18.3	17.9	15.6	11.3	6.8	3.7	68	61	57	53
Qpe	T-FR-012	4002011	8	285.618	17	4	47.8091	0.390286	156.75	6.2	7.6	11.4	14.8	18.1	21.9	24.1	23.6	20.9	15.8	10.1	6.5	0.1	0.6	2.2	4.7	7.6	10.8	12.6	12.3	10.3	6.8	3.5	0.9	3.1	4.1	6.8	9.8	12.8	16.3	18.3	17.9	15.6	11.3	6.8	3.7	68	61	57	53
Qpe	T-FR-012	4002014	8	250.167	15	4	47.8091	0.390286	156.75	6.2	7.6	11.4	14.8	18.1	21.9	24.1	23.6	20.9	15.8	10.1	6.5	0.1	0.6	2.2	4.7	7.6	10.8	12.6	12.3	10.3	6.8	3.5	0.9	3.1	4.1	6.8	9.8	12.8	16.3	18.3	17.9	15.6	11.3	6.8	3.7	68	61	57	53
Qpe	T-FR-012	4003022	8	202.432	22	4	47.8091	0.390286	156.75	6.2	7.6	11.4	14.8	18.1	21.9	24.1	23.6	20.9	15.8	10.1	6.5	0.1	0.6	2.2	4.7	7.6	10.8	12.6	12.3	10.3	6.8	3.5	0.9	3.1	4.1	6.8	9.8	12.8	16.3	18.3	17.9	15.6	11.3	6.8	3.7	68	61	57	53
Qpe	T-FR-012	4004035	8	227.263	19	4	47.8091	0.390286	156.75	6.2	7.6	11.4	14.8	18.1	21.9	24.1	23.6	20.9	15.8	10.1	6.5	0.1	0.6	2.2	4.7	7.6	10.8	12.6	12.3	10.3	6.8	3.5	0.9	3.1	4.1	6.8	9.8	12.8	16.3	18.3	17.9	15.6	11.3	6.8	3.7	68	61	57	53
Qpe	T-FR-012	4004038	8	219.094	16	4	47.8091	0.390286	156.75	6.2	7.6	11.4	14.8	18.1	21.9	24.1	23.6	20.9	15.8	10.1	6.5	0.1	0.6	2.2	4.7	7.6	10.8	12.6	12.3	10.3	6.8	3.5	0.9	3.1	4.1	6.8	9.8	12.8	16.3	18.3	17.9	15.6	11.3	6.8	3.7	68	61	57	53
Qpe	T-FR-012	4004039	8	244.031	16	4	47.8091	0.390286	156.75	6.2	7.6	11.4	14.8	18.1	21.9	24.1	23.6	20.9	15.8	10.1	6.5	0.1	0.6	2.2	4.7	7.6	10.8	12.6	12.3	10.3	6.8	3.5	0.9	3.1	4.1	6.8	9.8	12.8	16.3	18.3	17.9	15.6	11.3	6.8	3.7	68	61	57	53
Qpe	T-FR-012	4006053	8	205.5	18	4	47.8091	0.390286	156.75	6.2	7.6	11.4	14.8	18.1	21.9	24.1	23.6	20.9	15.8	10.1	6.5	0.1	0.6	2.2	4.7	7.6	10.8	12.6	12.3	10.3	6.8	3.5	0.9	3.1	4.1	6.8	9.8	12.8	16.3	18.3	17.9	15.6	11.3	6.8	3.7	68	61	57	53
Qpe	T-FR-012	4006055	8	218.75	18	4	47.8091	0.390286	156.75	6.2	7.6	11.4	14.8	18.1	21.9	24.1	23.6	20.9	15.8	10.1	6.5	0.1	0.6	2.2	4.7	7.6	10.8	12.6	12.3	10.3	6.8	3.5	0.9	3.1	4.1	6.8	9.8	12.8	16.3	18.3	17.9	15.6	11.3	6.8	3.7	68	61	57	53
Qpe	T-FR-012	4007065	8	270.444	9	4	47.8091	0.390286	156.75	6.2	7.6	11.4	14.8	18.1	21.9	24.1	23.6	20.9	15.8	10.1	6.5	0.1	0.6	2.2	4.7	7.6	10.8	12.6	12.3	10.3	6.8	3.5	0.9	3.1	4.1	6.8	9.8	12.8	16.3	18.3	17.9	15.6	11.3	6.8	3.7	68	61	57	53
Qpe	T-FR-012	4007066	8	245.156	16	4	47.8091	0.390286	156.75	6.2	7.6	11.4	14.8	18.1	21.9	24.1	23.6	20.9	15.8	10.1	6.5	0.1	0.6	2.2	4.7	7.6	10.8	12.6	12.3	10.3	6.8	3.5	0.9	3.1	4.1	6.8	9.8	12.8	16.3	18.3	17.9	15.6	11.3	6.8	3.7	68	61	57	53
Qpe	T-FR-012	4008072	8	235.154	13	4	47.8091	0.390286	156.75	6.2	7.6	11.4	14.8	18.1	21.9	24.1	23.6	20.9	15.8	10.1	6.5	0.1	0.6	2.2	4.7	7.6	10.8	12.6	12.3	10.3	6.8	3.5	0.9	3.1	4.1	6.8	9.8	12.8	16.3	18.3	17.9	15.6	11.3	6.8	3.7	68	61	57	53
Qpe	T-FR-012	4009081	8	262.389	18	4	47.8091	0.390286	156.75	6.2	7.6	11.4	14.8	18.1	21.9	24.1	23.6	20.9	15.8	10.1	6.5	0.1	0.6	2.2	4.7	7.6	10.8	12.6	12.3	10.3	6.8	3.5	0.9	3.1	4.1	6.8	9.8	12.8	16.3	18.3	17.9	15.6	11.3	6.8	3.7	68	61	57	53
Qpe	T-FR-012	4009084	8	251.5	18	4	47.8091	0.390286	156.75	6.2	7.6	11.4	14.8	18.1	21.9	24.1	23.6	20.9	15.8	10.1	6.5	0.1	0.6	2.2	4.7	7.6	10.8	12.6	12.3	10.3	6.8	3.5	0.9	3.1	4.1	6.8	9.8	12.8	16.3	18.3	17.9	15.6	11.3	6.8	3.7	68	61	57	53
Qpe	T-FR-012	4009088	8	243.219	16	4	47.8091	0.390286	156.75	6.2	7.6	11.4	14.8	18.1	21.9	24.1	23.6	20.9	15.8	10.1	6.5	0.1	0.6	2.2	4.7	7.6	10.8	12.6	12.3	10.3	6.8	3.5	0.9	3.1	4.1	6.8	9.8	12.8	16.3	18.3	17.9	15.6	11.3	6.8	3.7	68	61	57	53
Qpe	T-FR-012	5000002	8	334.667	21	4	47.8091	0.390286	156.75	6.2	7.6	11.4	14.8	18.1	21.9	24.1	23.6	20.9	15.8	10.1	6.5	0.1	0.6	2.2	4.7	7.6	10.8	12.6	12.3	10.3	6.8	3.5	0.9	3.1	4.1	6.8	9.8	12.8	16.3	18.3	17.9	15.6	11.3	6.8	3.7	68	61	57	53
Qpe	T-FR-012	5000004	8	329.977	22	4	47.8091	0.390286	156.75	6.2	7.6	11.4	14.8	18.1	21.9	24.1	23.6	20.9	15.8	10.1	6.5	0.1	0.6	2.2	4.7	7.6	10.8	12.6	12.3	10.3	6.8	3.5	0.9	3.1	4.1	6.8	9.8	12.8	16.3	18.3	17.9	15.6	11.3	6.8	3.7	68	61	57	53
Qpe	T-FR-012	5000005	8	328.604	24	4	47.8091	0.390286	156.75	6.2	7.6	11.4	14.8	18.1	21.9	24.1	23.6	20.9	15.8	10.1	6.5	0.1	0.6	2.2	4.7	7.6	10.8	12.6	12.3	10.3	6.8	3.5	0.9	3.1	4.1	6.8	9.8	12.8	16.3	18.3	17.9	15.6	11.3	6.8	3.7	68	61	57	53
Qpe	T-FR-012	5001008	8	311.283	23	4	47.8091	0.390286	156.75	6.2	7.6	11.4	14.8	18.1	21.9	24.1	23.6	20.9	15.8	10.1	6.5	0.1	0.6	2.2	4.7	7.6	10.8	12.6	12.3	10.3	6.8	3.5	0.9	3.1	4.1	6.8	9.8	12.8	16.3	18.3	17.9	15.6	11.3	6.8	3.7	68	61	57	53
Qpe	T-FR-012	5001010	8	300	23	4	47.8091	0.390286	156.75	6.2	7.6	11.4	14.8	18.1	21.9	24.1	23.6	20.9	15.8	10.1	6.5	0.1	0.6	2.2	4.7	7.6	10.8	12.6	12.3	10.3	6.8	3.5	0.9	3.1	4.1	6.8	9.8	12.8	16.3	18.3	17.9	15.6	11.3	6.8	3.7	68	61	57	53
Qpe	T-FR-012	5001012	8	371.737	19	4	47.8091	0.390286	156.75	6.2	7.6	11.4	14.8	18.1	21.9	24.1	23.6	20.9	15.8	10.1	6.5	0.1	0.6	2.2	4.7	7.6	10.8	12.6	12.3	10.3	6.8	3.5	0.9	3.1	4.1	6.8	9.8	12.8	16.3	18.3	17.9	15.6	11.3	6.8	3.7	68	61	57	53
Qpe	T-FR-012	5002015	8	326.932	22	4	47.8091	0.390286	156.75	6.2	7.6	11.4	14.8	18.1	21.9	24.1	23.6	20.9	15.8	10.1	6.5	0.1	0.6	2.2	4.7	7.6	10.8	12.6	12.3	10.3	6.8	3.5	0.9	3.1	4.1	6.8	9.8	12.8	16.3	18.3	17.9	15.6	11.3	6.8	3.7	68	61	57	53
Qpe	T-FR-012	5002017	8	345.214	21	4	47.8091	0.390286	156.75	6.2	7.6	11.4	14.8	18.1	21.9	24.1	23.6	20.9	15.8	10.1	6.5	0.1	0.6	2.2	4.7	7.6	10.8	12.6	12.3	10.3	6.8	3.5	0.9	3.1	4.1	6.8	9.8	12.8	16.3	18.3	17.9	15.6	11.3	6.8	3.7	68	61	57	53
Qpe	T-FR-012	5003021	8	345.065	23	4	47.8091	0.390286	156.75	6.2	7.6	11.4	14.8	18.1	21.9	24.1	23.6	20.9	15.8	10.1	6.5	0.1	0.6	2.2	4.7	7.6	10.8	12.6	12.3	10.3	6.8	3.5	0.9	3.1	4.1	6.8	9.8	12.8	16.3	18.3	17.9	15.6	11.3	6.8	3.7	68	61	57	53
Qpe	T-FR-012	5003023	8	273.842	19	4	47.8091	0.390286	156.75	6.2	7.6	11.4	14.8	18.1	21.9	24.1	23.6	20.9	15.8	10.1	6.5	0.1	0.6	2.2	4.7	7.6	10.8	12.6	12.3	10.3	6.8	3.5	0.9	3.1	4.1	6.8	9.8	12.8	16.3	18.3	17.9	15.6	11.3	6.8	3.7	68	61	57	53
Qpe	T-FR-012	5003025	8	322.222	18	4	47.8091	0.390286	156.75	6.2	7.6	11.4	14.8	18.1	21.9	24.1	23.6	20.9	15.8	10.1	6.5	0.1	0.6	2.2	4.7	7.6	10.8	12.6	12.3	10.3	6.8	3.5	0.9	3.1	4.1	6.8	9.8	12.8	16.3	18.3	17.9	15.6	11.3	6.8	3.7	68	61	57	53
Qpe	T-FR-012	5003026	8	319.233	15	4	47.8091	0.390286	156.75	6.2	7.6	11.4	14.8	18.1	21.9	24.1	23.6	20.9	15.8	10.1	6.5	0.1	0.6	2.2	4.7	7.6	10.8	12.6	12.3	10.3	6.8	3.5	0.9	3.1	4.1	6.8	9.8	12.8	16.3	18.3	17.9	15.6	11.3	6.8	3.7	68	61	57	53
Qpe	T-FR-012	5004030	8	304.6	20	4	47.8091	0.390286	156.75	6.2	7.6	11.4	14.8	18.1	21.9	24.1	23.6	20.9	15.8	10.1	6.5	0.1	0.6	2.2	4.7	7.6	10.8	12.6	12.3	10.3	6.8	3.5	0.9	3.1	4.1	6.8	9.8	12.8	16.3	18.3	17.9	15.6	11.3	6.8	3.7	68	61	57	53
Qpe	T-FR-012	5004033	8	275.632	19	4	47.8091	0.390286	156.75	6.2	7.6	11.4	14.8	18.1	21.9	24.1	23.6	20.9	15.8	10.1	6.5	0.1	0.6	2.2	4.7	7.6	10.8	12.6	12.3	10.3	6.8	3.5	0.9	3.1	4.1	6.8	9.8	12.8	16.3	18.3	17.9	15.6	11.3	6.8	3.7	68	61	57	53
Qpe	T-FR-012	5005035	8	310.105	19	4	47.8091	0.390286	156.75	6.2	7.6	11.4	14.8	18.1	21.9	24.1	23.6	20.9	15.8	10.1	6.5	0.1	0.6	2.2	4.7	7.6	10.8	12.6	12.3	10.3	6.8	3.5	0.9	3.1	4.1	6.8	9.8	12.8	16.3	18.3	17.9	15.6	11.3	6.8	3.7	68	61	57	53
Qpe	T-FR-012	6001001	8	279.568	22	4	47.8091	0.390286	156.75	6.2	7.6	11.4	14.8	18.1	21.9	24.1	23.6	20.9	15.8	10.1	6.5	0.1	0.6	2.2	4.7	7.6	10.8	12.6	12.3	10.3	6.8	3.5	0.9	3.1	4.1	6.8	9.8	12.8	16.3	18.3	17.9	15.6	11.3	6.8	3.7	68	61	57	53
Qpe	T-FR-012	6001002	8	284.2	20	4	47.8091	0.390286	156.75	6.2	7.6	11.4	14.8	18.1	21.9	24.1	23.6	20.9	15.8	10.1	6.5	0.1	0.6	2.2	4.7	7.6	10.8	12.6	12.3	10.3	6.8	3.5	0.9	3.1	4.1	6.8	9.8	12.8	16.3	18.3	17.9	15.6	11.3	6.8	3.7	68	61	57	53
Qpe	T-FR-012	6001010	8	267.211	19	4	47.8091	0.390286	156.75	6.2	7.6	11.4	14.8	18.1	21.9	24.1	23.6	20.9	15.8	10.1	6.5	0.1	0.6	2.2	4.7	7.6	10.8	12.6	12.3	10.3	6.8	3.5	0.9	3.1	4.1	6.8	9.8	12.8	16.3	18.3	17.9	15.6	11.3	6.8	3.7	68	61	57	53
Qpe	T-FR-012	6002012	8	295.696	23	4	47.8091	0.390286	156.75	6.2	7.6	11.4	14.8	18.1	21.9	24.1	23.6	20.9	15.8	10.1	6.5	0.1	0.6	2.2	4.7	7.6	10.8	12.6	12.3	10.3	6.8	3.5	0.9	3.1	4.1	6.8	9.8	12.8	16.3	18.3	17.9	15.6	11.3	6.8	3.7	68	61	57	53
Qpe	T-FR-012	6002013	8	263.174	23	4	47.8091	0.390286	156.75	6.2	7.6	11.4	14.8	18.1	21.9	24.1	23.6	20.9	15.8	10.1	6.5	0.1	0.6	2.2	4.7	7.6	10.8	12.6	12.3	10.3	6.8	3.5	0.9	3.1	4.1	6.8	9.8	12.8	16.3	18.3	17.9	15.6	11.3	6.8	3.7	68	61	57	53
Qpe	T-FR-012	6002014	8	253.045	22	4	47.8091	0.390286	156.75	6.2	7.6	11.4	14.8	18.1	21.9	24.1	23.6	20.9	15.8	10.1	6.5	0.1	0.6	2.2	4.7	7.6	10.8	12.6	12.3	10.3	6.8	3.5	0.9	3.1	4.1	6.8	9.8	12.8	16.3	18.3	17.9	15.6	11.3	6.8	3.7	68	61	57	53
Qpe	T-FR-012	6002015	8	273.45	20	4	47.8091	0.390286	156.75	6.2	7.6	11.4	14.8	18.1	21.9	24.1	23.6	20.9	15.8	10.1	6.5	0.1	0.6	2.2	4.7	7.6	10.8	12.6	12.3	10.3	6.8	3.5	0.9	3.1	4.1	6.8	9.8	12.8	16.3	18.3	17.9	15.6	11.3	6.8	3.7	68	61	57	53
Qpe	T-FR-012	6002016	8	284.435	23	4	47.8091	0.390286	156.75	6.2	7.6	11.4	14.8	18.1	21.9	24.1	23.6	20.9	15.8	10.1	6.5	0.1	0.6	2.2	4.7	7.6	10.8	12.6	12.3	10.3	6.8	3.5	0.9	3.1	4.1	6.8	9.8	12.8	16.3	18.3	17.9	15.6	11.3	6.8	3.7	68	61	57	53
Qpe	T-FR-012	6002017	8	234.45	10	4	47.8091	0.390286	156.75	6.2	7.6	11.4	14.8	18.1	21.9	24.1	23.6	20.9	15.8	10.1	6.5	0.1	0.6	2.2	4.7	7.6	10.8	12.6	12.3	10.3	6.8	3.5	0.9	3.1	4.1	6.8	9.8	12.8	16.3	18.3	17.9	15.6	11.3	6.8	3.7	68	61	57	53
Qpe	T-FR-012	6002019	8	241.708	12	4	47.8091	0.390286	156.75	6.2	7.6	11.4	14.8	18.1	21.9	24.1	23.6	20.9	15.8	10.1	6.5	0.1	0.6	2.2	4.7	7.6	10.8	12.6	12.3	10.3	6.8	3.5	0.9	3.1	4.1	6.8	9.8	12.8	16.3	18.3	17.9	15.6	11.3	6.8	3.7	68	61	57	53
Qpe	T-FR-012	4001004	8	119.071	7	41	56.1315	9.396	250	1.3	1.9	4.1	7.8	13.6	16.9	17.9	18.1	14.6	10.5	6	2.9	-6	-6	-2.9	1.3	6.1	9.4	11	10.2	7.8	4.5	-0.4	-0.8	-2.4	-2	0.6	4.6	9.8	13.1	14.5	14.1	11.2	7.5	2.8	1.1	61	42	47	47
Qpe	T-FR-012	4002017	8	150.1	10	41	56.1315	9.396	250	1.3	1.9	4.1	7.8	13.6	16.9	17.9	18.1	14.6	10.5	6	2.9	-6	-6	-2.9	1.3	6.1	9.4	11	10.2	7.8	4.5	-0.4	-0.8	-2.4	-2	0.6	4.6	9.8	13.1	14.5	14.1	11.2	7.5	2.8	1.1	61	42	47	47
Qpe	T-FR-012	4003022	8	190.031	16	41	56.1315	9.396	250	1.3	1.9	4.1	7.8	13.6	16.9	17.9	18.1	14.6	10.5	6	2.9	-6	-6	-2.9	1.3	6.1	9.4	11	10.2	7.8	4.5	-0.4	-0.8	-2.4	-2	0.6	4.6	9.8	13.1	14.5	14.1	11.2	7.5	2.8	1.1	61	42	47	47
Qpe	T-FR-012	4003030	8	196.441	17	41	56.1315	9.396	250	1.3	1.9	4.1	7.8	13.6	16.9	17.9	18.1	14.6	10.5	6	2.9	-6	-6	-2.9	1.3	6.1	9.4	11	10.2	7.8	4.5	-0.4	-0.8	-2.4	-2	0.6	4.6	9.8	13.1	14.5	14.1	11.2	7.5	2.8	1.1	61	42	47	47
Qpe	T-FR-012	4006052	8	197.643	14	41	56.1315	9.396	250	1.3	1.9	4.1	7.8	13.6	16.9	17.9	18.1	14.6	10.5	6	2.9	-6	-6	-2.9	1.3	6.1	9.4	11	10.2	7.8	4.5	-0.4	-0.8	-2.4	-2	0.6	4.6	9.8	13.1	14.5	14.1	11.2	7.5	2.8	1.1	61	42	47	47
Qpe	T-FR-012	4006054	8	173.143	14	41	56.1315	9.396	250	1.3	1.9	4.1	7.8	13.6	16.9	17.9	18.1	14.6	10.5	6	2.9	-6	-6	-2.9	1.3	6.1	9.4	11	10.2	7.8	4.5	-0.4	-0.8	-2.4	-2	0.6	4.6	9.8	13.1	14.5	14.1	11.2	7.5	2.8	1.1	61	42	47	47
Qpe	T-FR-012	4006060	8	215.881	21	41	56.1315	9.396	250	1.3	1.9	4.1	7.8	13.6	16.9	17.9	18.1	14.6	10.5	6	2.9	-6	-6	-2.9	1.3	6.1	9.4	11	10.2	7.8	4.5	-0.4	-0.8	-2.4	-2	0.6	4.6	9.8	13.1	14.5	14.1	11.2	7.5	2.8	1.1	61	42	47	47
Qpe	T-FR-012	4007064	8	169.889	18	41	56.1315	9.396	250	1.3	1.9	4.1	7.8	13.6	16.9	17.9	18.1	14.6	10.5	6	2.9	-6	-6	-2.9	1.3	6.1	9.4	11	10.2	7.8	4.5	-0.4	-0.8	-2.4	-2	0.6	4.6	9.8	13.1	14.5	14.1	11.2	7.5	2.8	1.1	61	42	47	47
Qpe	T-FR-012	4009082	8	210.026	19	41	56.1315	9.396	250	1.3	1.9	4.1	7.8	13.6	16.9	17.9	18.1	14.6	10.5	6	2.9	-6	-6	-2.9	1.3	6.1	9.4	11	10.2	7.8	4.5	-0.4	-0.8	-2.4	-2	0.6	4.6	9.8	13.1	14.5	14.1	11.2	7.5	2.8	1.1	61	42	47	47
Qpe	T-FR-012	4009086	8	213.786	21	41	56.1315	9.396	250	1.3	1.9	4.1	7.8	13.6	16.9	17.9	18.1	14.6	10.5	6	2.9	-6	-6	-2.9	1.3	6.1	9.4	11	10.2	7.8	4.5	-0.4	-0.8	-2.4	-2	0.6	4.6	9.8	13.1	14.5	14.1	11.2	7.5	2.8	1.1	61	42	47	47
Qpe	T-FR-012	1001003	8	311.553	17	50	46.604	0.178	130	6.9	8.3	12.3	15.4	18.5	22.5	24.6	24.1	21.8	16.6	11	7.3	0.6	1.2	2.8	5.3	8	11.4	13.2	12.8	11.1	7.4	4.1	1.3	3.7	4.7	7.5	10.3	13.2	16.9	18.9	18.5	16.4	12	7.5	4.3	70	62	57	53
Qpe	T-FR-012	1001006	8	310.806	16	50	46.604	0.178	130	6.9	8.3	12.3	15.4	18.5	22.5	24.6	24.1	21.8	16.6	11	7.3	0.6	1.2	2.8	5.3	8	11.4	13.2	12.8	11.1	7.4	4.1	1.3	3.7	4.7	7.5	10.3	13.2	16.9	18.9	18.5	16.4	12	7.5	4.3	70	62	57	53
Qpe	T-FR-012	1001007	8	303.488	19	50	46.604	0.178	130	6.9	8.3	12.3	15.4	18.5	22.5	24.6	24.1	21.8	16.6	11	7.3	0.6	1.2	2.8	5.3	8	11.4	13.2	12.8	11.1	7.4	4.1	1.3	3.7	4.7	7.5	10.3	13.2	16.9	18.9	18.5	16.4	12	7.5	4.3	70	62	57	53
Qpe	T-FR-012	1002010	8	281.808	19	50	46.604	0.178	130	6.9	8.3	12.3	15.4	18.5	22.5	24.6	24.1	21.8	16.6	11	7.3	0.6	1.2	2.8	5.3	8	11.4	13.2	12.8	11.1	7.4	4.1	1.3	3.7	4.7	7.5	10.3	13.2	16.9	18.9	18.5	16.4	12	7.5	4.3	70	62	57	53
Qpe	T-FR-012	1003015	8	246.587	18	50	46.604	0.178	130	6.9	8.3	12.3	15.4	18.5	22.5	24.6	24.1	21.8	16.6	11	7.3	0.6	1.2	2.8	5.3	8	11.4	13.2	12.8	11.1	7.4	4.1	1.3	3.7	4.7	7.5	10.3	13.2	16.9	18.9	18.5	16.4	12	7.5	4.3	70	62	57	53
Qpe	T-FR-012	1003018	8	278.109	18	50	46.604	0.178	130	6.9	8.3	12.3	15.4	18.5	22.5	24.6	24.1	21.8	16.6	11	7.3	0.6	1.2	2.8	5.3	8	11.4	13.2	12.8	11.1	7.4	4.1	1.3	3.7	4.7	7.5	10.3	13.2	16.9	18.9	18.5	16.4	12	7.5	4.3	70	62	57	53
Qpe	T-FR-012	1004022	8	314.734	15	50	46.604	0.178	130	6.9	8.3	12.3	15.4	18.5	22.5	24.6	24.1	21.8	16.6	11	7.3	0.6	1.2	2.8	5.3	8	11.4	13.2	12.8	11.1	7.4	4.1	1.3	3.7	4.7	7.5	10.3	13.2	16.9	18.9	18.5	16.4	12	7.5	4.3	70	62	57	53
Qpe	T-FR-012	1004024	8	257.706	18	50	46.604	0.178	130	6.9	8.3	12.3	15.4	18.5	22.5	24.6	24.1	21.8	16.6	11	7.3	0.6	1.2	2.8	5.3	8	11.4	13.2	12.8	11.1	7.4	4.1	1.3	3.7	4.7	7.5	10.3	13.2	16.9	18.9	18.5	16.4	12	7.5	4.3	70	62	57	53
Qpe	T-FR-012	1005027	8	300.641	19	50	46.604	0.178	130	6.9	8.3	12.3	15.4	18.5	22.5	24.6	24.1	21.8	16.6	11	7.3	0.6	1.2	2.8	5.3	8	11.4	13.2	12.8	11.1	7.4	4.1	1.3	3.7	4.7	7.5	10.3	13.2	16.9	18.9	18.5	16.4	12	7.5	4.3	70	62	57	53
Qpe	T-FR-012	1005028	8	287.3	21	50	46.604	0.178	130	6.9	8.3	12.3	15.4	18.5	22.5	24.6	24.1	21.8	16.6	11	7.3	0.6	1.2	2.8	5.3	8	11.4	13.2	12.8	11.1	7.4	4.1	1.3	3.7	4.7	7.5	10.3	13.2	16.9	18.9	18.5	16.4	12	7.5	4.3	70	62	57	53
Qpe	T-FR-012	4002012	8	182.067	15	61	51.769	7.174	75	3.9	5	8.3	12.8	17.4	20.5	21.9	21.5	18.9	14.4	7.9	4.9	-0.9	-0.6	1.6	4.1	7.9	10.8	12.5	12	9.7	6.8	2.8	0.2	1.5	2.2	5	8.5	12.7	15.7	17.2	16.7	14.3	10.6	5.4	2.5	71	49	64	55
Qpe	T-FR-012	4002019	8	142.923	13	61	51.769	7.174	75	3.9	5	8.3	12.8	17.4	20.5	21.9	21.5	18.9	14.4	7.9	4.9	-0.9	-0.6	1.6	4.1	7.9	10.8	12.5	12	9.7	6.8	2.8	0.2	1.5	2.2	5	8.5	12.7	15.7	17.2	16.7	14.3	10.6	5.4	2.5	71	49	64	55
Qpe	T-FR-012	4003022	8	167.962	13	61	51.769	7.174	75	3.9	5	8.3	12.8	17.4	20.5	21.9	21.5	18.9	14.4	7.9	4.9	-0.9	-0.6	1.6	4.1	7.9	10.8	12.5	12	9.7	6.8	2.8	0.2	1.5	2.2	5	8.5	12.7	15.7	17.2	16.7	14.3	10.6	5.4	2.5	71	49	64	55
Qpe	T-FR-012	4004035	8	226.154	13	61	51.769	7.174	75	3.9	5	8.3	12.8	17.4	20.5	21.9	21.5	18.9	14.4	7.9	4.9	-0.9	-0.6	1.6	4.1	7.9	10.8	12.5	12	9.7	6.8	2.8	0.2	1.5	2.2	5	8.5	12.7	15.7	17.2	16.7	14.3	10.6	5.4	2.5	71	49	64	55
Qpe	T-FR-012	4005046	8	209.036	14	61	51.769	7.174	75	3.9	5	8.3	12.8	17.4	20.5	21.9	21.5	18.9	14.4	7.9	4.9	-0.9	-0.6	1.6	4.1	7.9	10.8	12.5	12	9.7	6.8	2.8	0.2	1.5	2.2	5	8.5	12.7	15.7	17.2	16.7	14.3	10.6	5.4	2.5	71	49	64	55
Qpe	T-FR-012	4005049	8	194.705	22	61	51.769	7.174	75	3.9	5	8.3	12.8	17.4	20.5	21.9	21.5	18.9	14.4	7.9	4.9	-0.9	-0.6	1.6	4.1	7.9	10.8	12.5	12	9.7	6.8	2.8	0.2	1.5	2.2	5	8.5	12.7	15.7	17.2	16.7	14.3	10.6	5.4	2.5	71	49	64	55
Qpe	T-FR-012	4007062	8	208.136	11	61	51.769	7.174	75	3.9	5	8.3	12.8	17.4	20.5	21.9	21.5	18.9	14.4	7.9	4.9	-0.9	-0.6	1.6	4.1	7.9	10.8	12.5	12	9.7	6.8	2.8	0.2	1.5	2.2	5	8.5	12.7	15.7	17.2	16.7	14.3	10.6	5.4	2.5	71	49	64	55
Qpe	T-FR-012	4008072	8	213.375	12	61	51.769	7.174	75	3.9	5	8.3	12.8	17.4	20.5	21.9	21.5	18.9	14.4	7.9	4.9	-0.9	-0.6	1.6	4.1	7.9	10.8	12.5	12	9.7	6.8	2.8	0.2	1.5	2.2	5	8.5	12.7	15.7	17.2	16.7	14.3	10.6	5.4	2.5	71	49	64	55
Qpe	T-FR-012	4008079	8	251.05	20	61	51.769	7.174	75	3.9	5	8.3	12.8	17.4	20.5	21.9	21.5	18.9	14.4	7.9	4.9	-0.9	-0.6	1.6	4.1	7.9	10.8	12.5	12	9.7	6.8	2.8	0.2	1.5	2.2	5	8.5	12.7	15.7	17.2	16.7	14.3	10.6	5.4	2.5	71	49	64	55
Qpe	T-FR-012	4009090	8	251.447	19	61	51.769	7.174	75	3.9	5	8.3	12.8	17.4	20.5	21.9	21.5	18.9	14.4	7.9	4.9	-0.9	-0.6	1.6	4.1	7.9	10.8	12.5	12	9.7	6.8	2.8	0.2	1.5	2.2	5	8.5	12.7	15.7	17.2	16.7	14.3	10.6	5.4	2.5	71	49	64	55
Qpe	T-FR-012	2001003	8	287.375	8	77	47.761	5.487	330	3.4	5.3	10	14.1	17.8	21.1	23.4	22.9	20.1	14.5	8.2	3.9	-1.8	-1.3	1.3	4.4	7.7	11.1	12.9	12.5	10.4	6.2	2	-0.9	0.8	2	5.6	9.2	12.7	16.1	18.1	17.7	15.3	10.4	5.1	1.5	83	71	72	56
Qpe	T-FR-012	2002009	8	244.333	3	77	47.761	5.487	330	3.4	5.3	10	14.1	17.8	21.1	23.4	22.9	20.1	14.5	8.2	3.9	-1.8	-1.3	1.3	4.4	7.7	11.1	12.9	12.5	10.4	6.2	2	-0.9	0.8	2	5.6	9.2	12.7	16.1	18.1	17.7	15.3	10.4	5.1	1.5	83	71	72	56
Qpe	T-FR-012	2003016	8	345.294	17	77	47.761	5.487	330	3.4	5.3	10	14.1	17.8	21.1	23.4	22.9	20.1	14.5	8.2	3.9	-1.8	-1.3	1.3	4.4	7.7	11.1	12.9	12.5	10.4	6.2	2	-0.9	0.8	2	5.6	9.2	12.7	16.1	18.1	17.7	15.3	10.4	5.1	1.5	83	71	72	56
Qpe	T-FR-012	2004023	8	340.431	17	77	47.761	5.487	330	3.4	5.3	10	14.1	17.8	21.1	23.4	22.9	20.1	14.5	8.2	3.9	-1.8	-1.3	1.3	4.4	7.7	11.1	12.9	12.5	10.4	6.2	2	-0.9	0.8	2	5.6	9.2	12.7	16.1	18.1	17.7	15.3	10.4	5.1	1.5	83	71	72	56
Qpe	T-FR-012	2005028	8	296.071	14	77	47.761	5.487	330	3.4	5.3	10	14.1	17.8	21.1	23.4	22.9	20.1	14.5	8.2	3.9	-1.8	-1.3	1.3	4.4	7.7	11.1	12.9	12.5	10.4	6.2	2	-0.9	0.8	2	5.6	9.2	12.7	16.1	18.1	17.7	15.3	10.4	5.1	1.5	83	71	72	56
Qpe	T-FR-012	2006034	8	312.25	12	77	47.761	5.487	330	3.4	5.3	10	14.1	17.8	21.1	23.4	22.9	20.1	14.5	8.2	3.9	-1.8	-1.3	1.3	4.4	7.7	11.1	12.9	12.5	10.4	6.2	2	-0.9	0.8	2	5.6	9.2	12.7	16.1	18.1	17.7	15.3	10.4	5.1	1.5	83	71	72	56
Qpe	T-FR-012	2007039	8	324.556	15	77	47.761	5.487	330	3.4	5.3	10	14.1	17.8	21.1	23.4	22.9	20.1	14.5	8.2	3.9	-1.8	-1.3	1.3	4.4	7.7	11.1	12.9	12.5	10.4	6.2	2	-0.9	0.8	2	5.6	9.2	12.7	16.1	18.1	17.7	15.3	10.4	5.1	1.5	83	71	72	56
Qpe	T-FR-012	2008046	8	314.952	14	77	47.761	5.487	330	3.4	5.3	10	14.1	17.8	21.1	23.4	22.9	20.1	14.5	8.2	3.9	-1.8	-1.3	1.3	4.4	7.7	11.1	12.9	12.5	10.4	6.2	2	-0.9	0.8	2	5.6	9.2	12.7	16.1	18.1	17.7	15.3	10.4	5.1	1.5	83	71	72	56
Qpe	T-FR-012	2009052	8	266.722	12	77	47.761	5.487	330	3.4	5.3	10	14.1	17.8	21.1	23.4	22.9	20.1	14.5	8.2	3.9	-1.8	-1.3	1.3	4.4	7.7	11.1	12.9	12.5	10.4	6.2	2	-0.9	0.8	2	5.6	9.2	12.7	16.1	18.1	17.7	15.3	10.4	5.1	1.5	83	71	72	56
Qpe	T-FR-012	2010058	8	330.923	13	77	47.761	5.487	330	3.4	5.3	10	14.1	17.8	21.1	23.4	22.9	20.1	14.5	8.2	3.9	-1.8	-1.3	1.3	4.4	7.7	11.1	12.9	12.5	10.4	6.2	2	-0.9	0.8	2	5.6	9.2	12.7	16.1	18.1	17.7	15.3	10.4	5.1	1.5	83	71	72	56
Qpe	T-FR-012	4001004	8	171.318	11	77	47.761	5.487	330	3.4	5.3	10	14.1	17.8	21.1	23.4	22.9	20.1	14.5	8.2	3.9	-1.8	-1.3	1.3	4.4	7.7	11.1	12.9	12.5	10.4	6.2	2	-0.9	0.8	2	5.6	9.2	12.7	16.1	18.1	17.7	15.3	10.4	5.1	1.5	83	71	72	56
Qpe	T-FR-012	4002016	8	238.868	19	77	47.761	5.487	330	3.4	5.3	10	14.1	17.8	21.1	23.4	22.9	20.1	14.5	8.2	3.9	-1.8	-1.3	1.3	4.4	7.7	11.1	12.9	12.5	10.4	6.2	2	-0.9	0.8	2	5.6	9.2	12.7	16.1	18.1	17.7	15.3	10.4	5.1	1.5	83	71	72	56
Qpe	T-FR-012	4002019	8	136.458	12	77	47.761	5.487	330	3.4	5.3	10	14.1	17.8	21.1	23.4	22.9	20.1	14.5	8.2	3.9	-1.8	-1.3	1.3	4.4	7.7	11.1	12.9	12.5	10.4	6.2	2	-0.9	0.8	2	5.6	9.2	12.7	16.1	18.1	17.7	15.3	10.4	5.1	1.5	83	71	72	56
Qpe	T-FR-012	4004033	8	269.45	10	77	47.761	5.487	330	3.4	5.3	10	14.1	17.8	21.1	23.4	22.9	20.1	14.5	8.2	3.9	-1.8	-1.3	1.3	4.4	7.7	11.1	12.9	12.5	10.4	6.2	2	-0.9	0.8	2	5.6	9.2	12.7	16.1	18.1	17.7	15.3	10.4	5.1	1.5	83	71	72	56
Qpe	T-FR-012	4004036	8	234.812	16	77	47.761	5.487	330	3.4	5.3	10	14.1	17.8	21.1	23.4	22.9	20.1	14.5	8.2	3.9	-1.8	-1.3	1.3	4.4	7.7	11.1	12.9	12.5	10.4	6.2	2	-0.9	0.8	2	5.6	9.2	12.7	16.1	18.1	17.7	15.3	10.4	5.1	1.5	83	71	72	56
Qpe	T-FR-012	4004037	8	221.647	17	77	47.761	5.487	330	3.4	5.3	10	14.1	17.8	21.1	23.4	22.9	20.1	14.5	8.2	3.9	-1.8	-1.3	1.3	4.4	7.7	11.1	12.9	12.5	10.4	6.2	2	-0.9	0.8	2	5.6	9.2	12.7	16.1	18.1	17.7	15.3	10.4	5.1	1.5	83	71	72	56
Qpe	T-FR-012	4005043	8	228.395	19	77	47.761	5.487	330	3.4	5.3	10	14.1	17.8	21.1	23.4	22.9	20.1	14.5	8.2	3.9	-1.8	-1.3	1.3	4.4	7.7	11.1	12.9	12.5	10.4	6.2	2	-0.9	0.8	2	5.6	9.2	12.7	16.1	18.1	17.7	15.3	10.4	5.1	1.5	83	71	72	56
Qpe	T-FR-012	4006053	8	215.357	21	77	47.761	5.487	330	3.4	5.3	10	14.1	17.8	21.1	23.4	22.9	20.1	14.5	8.2	3.9	-1.8	-1.3	1.3	4.4	7.7	11.1	12.9	12.5	10.4	6.2	2	-0.9	0.8	2	5.6	9.2	12.7	16.1	18.1	17.7	15.3	10.4	5.1	1.5	83	71	72	56
Qpe	T-FR-012	4006057	8	203.821	14	77	47.761	5.487	330	3.4	5.3	10	14.1	17.8	21.1	23.4	22.9	20.1	14.5	8.2	3.9	-1.8	-1.3	1.3	4.4	7.7	11.1	12.9	12.5	10.4	6.2	2	-0.9	0.8	2	5.6	9.2	12.7	16.1	18.1	17.7	15.3	10.4	5.1	1.5	83	71	72	56
Qpe	T-FR-012	4007061	8	229.528	18	77	47.761	5.487	330	3.4	5.3	10	14.1	17.8	21.1	23.4	22.9	20.1	14.5	8.2	3.9	-1.8	-1.3	1.3	4.4	7.7	11.1	12.9	12.5	10.4	6.2	2	-0.9	0.8	2	5.6	9.2	12.7	16.1	18.1	17.7	15.3	10.4	5.1	1.5	83	71	72	56
Qpe	T-FR-012	4008072	8	287.5	18	77	47.761	5.487	330	3.4	5.3	10	14.1	17.8	21.1	23.4	22.9	20.1	14.5	8.2	3.9	-1.8	-1.3	1.3	4.4	7.7	11.1	12.9	12.5	10.4	6.2	2	-0.9	0.8	2	5.6	9.2	12.7	16.1	18.1	17.7	15.3	10.4	5.1	1.5	83	71	72	56
Qpe	T-FR-012	4008076	8	195.05	20	77	47.761	5.487	330	3.4	5.3	10	14.1	17.8	21.1	23.4	22.9	20.1	14.5	8.2	3.9	-1.8	-1.3	1.3	4.4	7.7	11.1	12.9	12.5	10.4	6.2	2	-0.9	0.8	2	5.6	9.2	12.7	16.1	18.1	17.7	15.3	10.4	5.1	1.5	83	71	72	56
Qpe	T-FR-012	4008077	8	274.562	16	77	47.761	5.487	330	3.4	5.3	10	14.1	17.8	21.1	23.4	22.9	20.1	14.5	8.2	3.9	-1.8	-1.3	1.3	4.4	7.7	11.1	12.9	12.5	10.4	6.2	2	-0.9	0.8	2	5.6	9.2	12.7	16.1	18.1	17.7	15.3	10.4	5.1	1.5	83	71	72	56
Qpe	T-FR-012	4008080	8	278.885	13	77	47.761	5.487	330	3.4	5.3	10	14.1	17.8	21.1	23.4	22.9	20.1	14.5	8.2	3.9	-1.8	-1.3	1.3	4.4	7.7	11.1	12.9	12.5	10.4	6.2	2	-0.9	0.8	2	5.6	9.2	12.7	16.1	18.1	17.7	15.3	10.4	5.1	1.5	83	71	72	56
Qpe	T-FR-012	4009086	8	265.625	20	77	47.761	5.487	330	3.4	5.3	10	14.1	17.8	21.1	23.4	22.9	20.1	14.5	8.2	3.9	-1.8	-1.3	1.3	4.4	7.7	11.1	12.9	12.5	10.4	6.2	2	-0.9	0.8	2	5.6	9.2	12.7	16.1	18.1	17.7	15.3	10.4	5.1	1.5	83	71	72	56
Qpe	T-FR-012	4001007	8	140.5	4	87	49.361	7.872	470	1.1	3.3	7.3	12	16.1	19.9	21.3	20.4	18.6	13	6.2	3	-3.8	-3.2	-0.9	2.4	5.9	9.4	10.9	10.5	8.2	4.6	0.4	-2.2	-1.4	0	3.2	7.2	11	14.6	16.1	15.4	13.4	8.8	3.3	0.4	63	54	51	52
Qpe	T-FR-012	4002012	8	230.364	11	87	49.361	7.872	470	1.1	3.3	7.3	12	16.1	19.9	21.3	20.4	18.6	13	6.2	3	-3.8	-3.2	-0.9	2.4	5.9	9.4	10.9	10.5	8.2	4.6	0.4	-2.2	-1.4	0	3.2	7.2	11	14.6	16.1	15.4	13.4	8.8	3.3	0.4	63	54	51	52
Qpe	T-FR-012	4002014	8	231	20	87	49.361	7.872	470	1.1	3.3	7.3	12	16.1	19.9	21.3	20.4	18.6	13	6.2	3	-3.8	-3.2	-0.9	2.4	5.9	9.4	10.9	10.5	8.2	4.6	0.4	-2.2	-1.4	0	3.2	7.2	11	14.6	16.1	15.4	13.4	8.8	3.3	0.4	63	54	51	52
Qpe	T-FR-012	4002019	8	197.062	16	87	49.361	7.872	470	1.1	3.3	7.3	12	16.1	19.9	21.3	20.4	18.6	13	6.2	3	-3.8	-3.2	-0.9	2.4	5.9	9.4	10.9	10.5	8.2	4.6	0.4	-2.2	-1.4	0	3.2	7.2	11	14.6	16.1	15.4	13.4	8.8	3.3	0.4	63	54	51	52
Qpe	T-FR-012	4003024	8	255.773	11	87	49.361	7.872	470	1.1	3.3	7.3	12	16.1	19.9	21.3	20.4	18.6	13	6.2	3	-3.8	-3.2	-0.9	2.4	5.9	9.4	10.9	10.5	8.2	4.6	0.4	-2.2	-1.4	0	3.2	7.2	11	14.6	16.1	15.4	13.4	8.8	3.3	0.4	63	54	51	52
Qpe	T-FR-012	4004031	8	218.133	30	87	49.361	7.872	470	1.1	3.3	7.3	12	16.1	19.9	21.3	20.4	18.6	13	6.2	3	-3.8	-3.2	-0.9	2.4	5.9	9.4	10.9	10.5	8.2	4.6	0.4	-2.2	-1.4	0	3.2	7.2	11	14.6	16.1	15.4	13.4	8.8	3.3	0.4	63	54	51	52
Qpe	T-FR-012	4004033	8	258.923	13	87	49.361	7.872	470	1.1	3.3	7.3	12	16.1	19.9	21.3	20.4	18.6	13	6.2	3	-3.8	-3.2	-0.9	2.4	5.9	9.4	10.9	10.5	8.2	4.6	0.4	-2.2	-1.4	0	3.2	7.2	11	14.6	16.1	15.4	13.4	8.8	3.3	0.4	63	54	51	52
Qpe	T-FR-012	4005042	8	232.5	18	87	49.361	7.872	470	1.1	3.3	7.3	12	16.1	19.9	21.3	20.4	18.6	13	6.2	3	-3.8	-3.2	-0.9	2.4	5.9	9.4	10.9	10.5	8.2	4.6	0.4	-2.2	-1.4	0	3.2	7.2	11	14.6	16.1	15.4	13.4	8.8	3.3	0.4	63	54	51	52
Qpe	T-FR-012	4005044	8	260.344	16	87	49.361	7.872	470	1.1	3.3	7.3	12	16.1	19.9	21.3	20.4	18.6	13	6.2	3	-3.8	-3.2	-0.9	2.4	5.9	9.4	10.9	10.5	8.2	4.6	0.4	-2.2	-1.4	0	3.2	7.2	11	14.6	16.1	15.4	13.4	8.8	3.3	0.4	63	54	51	52
Qpe	T-FR-012	4005048	8	236.226	42	87	49.361	7.872	470	1.1	3.3	7.3	12	16.1	19.9	21.3	20.4	18.6	13	6.2	3	-3.8	-3.2	-0.9	2.4	5.9	9.4	10.9	10.5	8.2	4.6	0.4	-2.2	-1.4	0	3.2	7.2	11	14.6	16.1	15.4	13.4	8.8	3.3	0.4	63	54	51	52
Qpe	T-FR-012	4007066	8	214.643	14	87	49.361	7.872	470	1.1	3.3	7.3	12	16.1	19.9	21.3	20.4	18.6	13	6.2	3	-3.8	-3.2	-0.9	2.4	5.9	9.4	10.9	10.5	8.2	4.6	0.4	-2.2	-1.4	0	3.2	7.2	11	14.6	16.1	15.4	13.4	8.8	3.3	0.4	63	54	51	52
Qpe	T-FR-012	4007067	8	190.125	16	87	49.361	7.872	470	1.1	3.3	7.3	12	16.1	19.9	21.3	20.4	18.6	13	6.2	3	-3.8	-3.2	-0.9	2.4	5.9	9.4	10.9	10.5	8.2	4.6	0.4	-2.2	-1.4	0	3.2	7.2	11	14.6	16.1	15.4	13.4	8.8	3.3	0.4	63	54	51	52
Qpe	T-FR-012	4007068	8	234.111	18	87	49.361	7.872	470	1.1	3.3	7.3	12	16.1	19.9	21.3	20.4	18.6	13	6.2	3	-3.8	-3.2	-0.9	2.4	5.9	9.4	10.9	10.5	8.2	4.6	0.4	-2.2	-1.4	0	3.2	7.2	11	14.6	16.1	15.4	13.4	8.8	3.3	0.4	63	54	51	52
Qpe	T-FR-012	4008074	8	219.719	16	87	49.361	7.872	470	1.1	3.3	7.3	12	16.1	19.9	21.3	20.4	18.6	13	6.2	3	-3.8	-3.2	-0.9	2.4	5.9	9.4	10.9	10.5	8.2	4.6	0.4	-2.2	-1.4	0	3.2	7.2	11	14.6	16.1	15.4	13.4	8.8	3.3	0.4	63	54	51	52
Qpe	T-FR-012	4009084	8	265.477	22	87	49.361	7.872	470	1.1	3.3	7.3	12	16.1	19.9	21.3	20.4	18.6	13	6.2	3	-3.8	-3.2	-0.9	2.4	5.9	9.4	10.9	10.5	8.2	4.6	0.4	-2.2	-1.4	0	3.2	7.2	11	14.6	16.1	15.4	13.4	8.8	3.3	0.4	63	54	51	52
Qpe	T-FR-012	4009086	8	278.206	17	87	49.361	7.872	470	1.1	3.3	7.3	12	16.1	19.9	21.3	20.4	18.6	13	6.2	3	-3.8	-3.2	-0.9	2.4	5.9	9.4	10.9	10.5	8.2	4.6	0.4	-2.2	-1.4	0	3.2	7.2	11	14.6	16.1	15.4	13.4	8.8	3.3	0.4	63	54	51	52
Qpe	T-FR-012	4009089	8	267.433	15	87	49.361	7.872	470	1.1	3.3	7.3	12	16.1	19.9	21.3	20.4	18.6	13	6.2	3	-3.8	-3.2	-0.9	2.4	5.9	9.4	10.9	10.5	8.2	4.6	0.4	-2.2	-1.4	0	3.2	7.2	11	14.6	16.1	15.4	13.4	8.8	3.3	0.4	63	54	51	52
Qpe	T-GB-001	1	8	223.437	141	1	51.7942	-2.4895	90.6667	6.4	6.6	8.9	12.2	15.4	18.9	20.4	19.9	17.5	13.9	9.3	7.3	1.1	1	2	4.4	7.1	10.3	11.8	11.6	9.5	7.1	3.4	1.9	3.8	3.8	5.5	8.3	11.3	14.6	16.1	15.7	13.5	10.5	6.4	4.6	81	56	64	54
Qpe	T-GB-001	2	8	226.15	143	1	51.7942	-2.4895	90.6667	6.4	6.6	8.9	12.2	15.4	18.9	20.4	19.9	17.5	13.9	9.3	7.3	1.1	1	2	4.4	7.1	10.3	11.8	11.6	9.5	7.1	3.4	1.9	3.8	3.8	5.5	8.3	11.3	14.6	16.1	15.7	13.5	10.5	6.4	4.6	81	56	64	54
Qpe	T-GB-001	3	8	225.751	144	1	51.7942	-2.4895	90.6667	6.4	6.6	8.9	12.2	15.4	18.9	20.4	19.9	17.5	13.9	9.3	7.3	1.1	1	2	4.4	7.1	10.3	11.8	11.6	9.5	7.1	3.4	1.9	3.8	3.8	5.5	8.3	11.3	14.6	16.1	15.7	13.5	10.5	6.4	4.6	81	56	64	54
Qpe	T-GB-001	1	8	163.711	36	21	46.4607	2.89067	270	6.1	7.8	12	15.1	18.5	22.2	24.7	24.1	21.7	16.3	10.3	6.4	-1	-0.3	1.4	4.2	7.3	10.6	12.3	12	10.2	6.1	2.8	-0.2	2.6	3.7	6.7	9.6	12.9	16.4	18.5	18.1	15.9	11.2	6.6	3.1	58	58	56	55
Qpe	T-GB-001	2	8	175.295	36	21	46.4607	2.89067	270	6.1	7.8	12	15.1	18.5	22.2	24.7	24.1	21.7	16.3	10.3	6.4	-1	-0.3	1.4	4.2	7.3	10.6	12.3	12	10.2	6.1	2.8	-0.2	2.6	3.7	6.7	9.6	12.9	16.4	18.5	18.1	15.9	11.2	6.6	3.1	58	58	56	55
Qpe	T-GB-001	3	8	202.448	36	21	46.4607	2.89067	270	6.1	7.8	12	15.1	18.5	22.2	24.7	24.1	21.7	16.3	10.3	6.4	-1	-0.3	1.4	4.2	7.3	10.6	12.3	12	10.2	6.1	2.8	-0.2	2.6	3.7	6.7	9.6	12.9	16.4	18.5	18.1	15.9	11.2	6.6	3.1	58	58	56	55
Qpe	T-GB-001	1	8	208.806	36	26	51.948	-2.45	70	6.5	6.8	9.1	12.2	15.5	18.9	20.3	19.9	17.6	14.2	9.5	7.4	1.2	1.1	2.2	4.5	7.2	10.3	11.8	11.6	9.6	7.3	3.6	2.1	3.9	4	5.6	8.3	11.3	14.6	16.1	15.7	13.6	10.7	6.5	4.8	69	48	55	49
Qpe	T-GB-001	2	8	237.108	36	26	51.948	-2.45	70	6.5	6.8	9.1	12.2	15.5	18.9	20.3	19.9	17.6	14.2	9.5	7.4	1.2	1.1	2.2	4.5	7.2	10.3	11.8	11.6	9.6	7.3	3.6	2.1	3.9	4	5.6	8.3	11.3	14.6	16.1	15.7	13.6	10.7	6.5	4.8	69	48	55	49
Qpe	T-GB-001	3	8	202.885	36	26	51.948	-2.45	70	6.5	6.8	9.1	12.2	15.5	18.9	20.3	19.9	17.6	14.2	9.5	7.4	1.2	1.1	2.2	4.5	7.2	10.3	11.8	11.6	9.6	7.3	3.6	2.1	3.9	4	5.6	8.3	11.3	14.6	16.1	15.7	13.6	10.7	6.5	4.8	69	48	55	49
Qpe	T-GB-001	1	8	207.836	36	260	56.071	9.597	25	2.7	3.3	5.4	9.2	14.7	18	19.3	19.1	15.9	11.6	7.3	4.3	-5.4	-5.4	-2	2.8	7.6	11	12.9	11.7	9.3	5.6	1.1	0.2	-1.3	-1	1.7	6	11.1	14.5	16.1	15.4	12.6	8.6	4.2	2.2	59	41	47	43
Qpe	T-GB-001	2	8	157.028	36	260	56.071	9.597	25	2.7	3.3	5.4	9.2	14.7	18	19.3	19.1	15.9	11.6	7.3	4.3	-5.4	-5.4	-2	2.8	7.6	11	12.9	11.7	9.3	5.6	1.1	0.2	-1.3	-1	1.7	6	11.1	14.5	16.1	15.4	12.6	8.6	4.2	2.2	59	41	47	43
Qpe	T-GB-001	3	8	222.988	36	260	56.071	9.597	25	2.7	3.3	5.4	9.2	14.7	18	19.3	19.1	15.9	11.6	7.3	4.3	-5.4	-5.4	-2	2.8	7.6	11	12.9	11.7	9.3	5.6	1.1	0.2	-1.3	-1	1.7	6	11.1	14.5	16.1	15.4	12.6	8.6	4.2	2.2	59	41	47	43
Qpe	T-GB-001	1	8	248.245	36	263	53.707	9.762	10	2	3.1	6.7	11.8	17	20.3	21.5	21.4	18.6	13	7.3	3.7	-2.6	-2.5	-0.3	2.7	6.6	9.9	11.9	11.5	9	5.8	2.3	-0.8	-0.3	0.3	3.2	7.3	11.8	15.1	16.7	16.4	13.8	9.4	4.8	1.5	62	44	52	47
Qpe	T-GB-001	2	8	199.364	36	263	53.707	9.762	10	2	3.1	6.7	11.8	17	20.3	21.5	21.4	18.6	13	7.3	3.7	-2.6	-2.5	-0.3	2.7	6.6	9.9	11.9	11.5	9	5.8	2.3	-0.8	-0.3	0.3	3.2	7.3	11.8	15.1	16.7	16.4	13.8	9.4	4.8	1.5	62	44	52	47
Qpe	T-GB-001	3	8	217.243	36	263	53.707	9.762	10	2	3.1	6.7	11.8	17	20.3	21.5	21.4	18.6	13	7.3	3.7	-2.6	-2.5	-0.3	2.7	6.6	9.9	11.9	11.5	9	5.8	2.3	-0.8	-0.3	0.3	3.2	7.3	11.8	15.1	16.7	16.4	13.8	9.4	4.8	1.5	62	44	52	47
Qpe	T-GB-001	1	8	151.2	36	277	40.917	31.667	1200	2.1	3.8	8.1	12.7	17.1	20.7	22.8	23	20.4	14.9	10.3	4.2	-4.5	-3.4	-1.1	2.7	6.5	9.2	11.4	11.1	8.7	5	1.6	-2	-1.2	0.2	3.5	7.7	11.8	14.9	17.1	17	14.6	10	6	1.1	87	69	68	67
Qpe	T-GB-001	2	8	175.777	36	277	40.917	31.667	1200	2.1	3.8	8.1	12.7	17.1	20.7	22.8	23	20.4	14.9	10.3	4.2	-4.5	-3.4	-1.1	2.7	6.5	9.2	11.4	11.1	8.7	5	1.6	-2	-1.2	0.2	3.5	7.7	11.8	14.9	17.1	17	14.6	10	6	1.1	87	69	68	67
Qpe	T-GB-001	3	8	179.708	36	277	40.917	31.667	1200	2.1	3.8	8.1	12.7	17.1	20.7	22.8	23	20.4	14.9	10.3	4.2	-4.5	-3.4	-1.1	2.7	6.5	9.2	11.4	11.1	8.7	5	1.6	-2	-1.2	0.2	3.5	7.7	11.8	14.9	17.1	17	14.6	10	6	1.1	87	69	68	67
Qpe	T-GB-001	1	8	187.314	36	31	52.8327	10.317	110	2	3.1	7.1	12.2	17.7	21	22.3	22	18.5	13	7	3.3	-3.1	-3	-0.8	2.4	6.3	9.6	11.7	11.2	8.5	5.2	1.8	-1.6	-0.6	0	3.1	7.3	12	15.3	17	16.6	13.5	9.1	4.4	0.8	53	42	47	50
Qpe	T-GB-001	2	8	162.719	36	31	52.8327	10.317	110	2	3.1	7.1	12.2	17.7	21	22.3	22	18.5	13	7	3.3	-3.1	-3	-0.8	2.4	6.3	9.6	11.7	11.2	8.5	5.2	1.8	-1.6	-0.6	0	3.1	7.3	12	15.3	17	16.6	13.5	9.1	4.4	0.8	53	42	47	50
Qpe	T-GB-001	3	8	175.333	36	31	52.8327	10.317	110	2	3.1	7.1	12.2	17.7	21	22.3	22	18.5	13	7	3.3	-3.1	-3	-0.8	2.4	6.3	9.6	11.7	11.2	8.5	5.2	1.8	-1.6	-0.6	0	3.1	7.3	12	15.3	17	16.6	13.5	9.1	4.4	0.8	53	42	47	50
Qpe	T-GB-001	1	8	194.314	35	33	51.1827	17.9313	210	-0.2	1.5	6.7	13	18.2	21.7	22.8	22.6	18.6	13.6	6.9	2.1	-5.7	-4.5	-0.9	3	7.4	10.9	12	11.6	8.8	4.7	1	-3.1	-3	-1.5	2.9	8	12.8	16.3	17.4	17.1	13.7	9.1	4	-0.5	31	28	29	37
Qpe	T-GB-001	2	8	204.212	36	33	51.1827	17.9313	210	-0.2	1.5	6.7	13	18.2	21.7	22.8	22.6	18.6	13.6	6.9	2.1	-5.7	-4.5	-0.9	3	7.4	10.9	12	11.6	8.8	4.7	1	-3.1	-3	-1.5	2.9	8	12.8	16.3	17.4	17.1	13.7	9.1	4	-0.5	31	28	29	37
Qpe	T-GB-001	3	8	249.302	36	33	51.1827	17.9313	210	-0.2	1.5	6.7	13	18.2	21.7	22.8	22.6	18.6	13.6	6.9	2.1	-5.7	-4.5	-0.9	3	7.4	10.9	12	11.6	8.8	4.7	1	-3.1	-3	-1.5	2.9	8	12.8	16.3	17.4	17.1	13.7	9.1	4	-0.5	31	28	29	37
Qpe	T-GB-001	1	8	261.633	36	4	47.8091	0.390286	156.75	6.2	7.6	11.4	14.8	18.1	21.9	24.1	23.6	20.9	15.8	10.1	6.5	0.1	0.6	2.2	4.7	7.6	10.8	12.6	12.3	10.3	6.8	3.5	0.9	3.1	4.1	6.8	9.8	12.8	16.3	18.3	17.9	15.6	11.3	6.8	3.7	68	61	57	53
Qpe	T-GB-001	2	8	267.132	36	4	47.8091	0.390286	156.75	6.2	7.6	11.4	14.8	18.1	21.9	24.1	23.6	20.9	15.8	10.1	6.5	0.1	0.6	2.2	4.7	7.6	10.8	12.6	12.3	10.3	6.8	3.5	0.9	3.1	4.1	6.8	9.8	12.8	16.3	18.3	17.9	15.6	11.3	6.8	3.7	68	61	57	53
Qpe	T-GB-001	3	8	306.569	36	4	47.8091	0.390286	156.75	6.2	7.6	11.4	14.8	18.1	21.9	24.1	23.6	20.9	15.8	10.1	6.5	0.1	0.6	2.2	4.7	7.6	10.8	12.6	12.3	10.3	6.8	3.5	0.9	3.1	4.1	6.8	9.8	12.8	16.3	18.3	17.9	15.6	11.3	6.8	3.7	68	61	57	53
Qpe	T-GB-001	1	8	216.666	36	41	56.1315	9.396	250	1.3	1.9	4.1	7.8	13.6	16.9	17.9	18.1	14.6	10.5	6	2.9	-6	-6	-2.9	1.3	6.1	9.4	11	10.2	7.8	4.5	-0.4	-0.8	-2.4	-2	0.6	4.6	9.8	13.1	14.5	14.1	11.2	7.5	2.8	1.1	61	42	47	47
Qpe	T-GB-001	2	8	174.346	36	41	56.1315	9.396	250	1.3	1.9	4.1	7.8	13.6	16.9	17.9	18.1	14.6	10.5	6	2.9	-6	-6	-2.9	1.3	6.1	9.4	11	10.2	7.8	4.5	-0.4	-0.8	-2.4	-2	0.6	4.6	9.8	13.1	14.5	14.1	11.2	7.5	2.8	1.1	61	42	47	47
Qpe	T-GB-001	3	8	174.527	36	41	56.1315	9.396	250	1.3	1.9	4.1	7.8	13.6	16.9	17.9	18.1	14.6	10.5	6	2.9	-6	-6	-2.9	1.3	6.1	9.4	11	10.2	7.8	4.5	-0.4	-0.8	-2.4	-2	0.6	4.6	9.8	13.1	14.5	14.1	11.2	7.5	2.8	1.1	61	42	47	47
Qpe	T-GB-001	1	8	227.713	36	50	46.604	0.178	130	6.9	8.3	12.3	15.4	18.5	22.5	24.6	24.1	21.8	16.6	11	7.3	0.6	1.2	2.8	5.3	8	11.4	13.2	12.8	11.1	7.4	4.1	1.3	3.7	4.7	7.5	10.3	13.2	16.9	18.9	18.5	16.4	12	7.5	4.3	70	62	57	53
Qpe	T-GB-001	2	8	183.363	36	50	46.604	0.178	130	6.9	8.3	12.3	15.4	18.5	22.5	24.6	24.1	21.8	16.6	11	7.3	0.6	1.2	2.8	5.3	8	11.4	13.2	12.8	11.1	7.4	4.1	1.3	3.7	4.7	7.5	10.3	13.2	16.9	18.9	18.5	16.4	12	7.5	4.3	70	62	57	53
Qpe	T-GB-001	3	8	166.515	36	50	46.604	0.178	130	6.9	8.3	12.3	15.4	18.5	22.5	24.6	24.1	21.8	16.6	11	7.3	0.6	1.2	2.8	5.3	8	11.4	13.2	12.8	11.1	7.4	4.1	1.3	3.7	4.7	7.5	10.3	13.2	16.9	18.9	18.5	16.4	12	7.5	4.3	70	62	57	53
Qpe	T-GB-001	1	8	239.921	36	61	51.769	7.174	75	3.9	5	8.3	12.8	17.4	20.5	21.9	21.5	18.9	14.4	7.9	4.9	-0.9	-0.6	1.6	4.1	7.9	10.8	12.5	12	9.7	6.8	2.8	0.2	1.5	2.2	5	8.5	12.7	15.7	17.2	16.7	14.3	10.6	5.4	2.5	71	49	64	55
Qpe	T-GB-001	2	8	174.686	36	61	51.769	7.174	75	3.9	5	8.3	12.8	17.4	20.5	21.9	21.5	18.9	14.4	7.9	4.9	-0.9	-0.6	1.6	4.1	7.9	10.8	12.5	12	9.7	6.8	2.8	0.2	1.5	2.2	5	8.5	12.7	15.7	17.2	16.7	14.3	10.6	5.4	2.5	71	49	64	55
Qpe	T-GB-001	3	8	209.506	36	61	51.769	7.174	75	3.9	5	8.3	12.8	17.4	20.5	21.9	21.5	18.9	14.4	7.9	4.9	-0.9	-0.6	1.6	4.1	7.9	10.8	12.5	12	9.7	6.8	2.8	0.2	1.5	2.2	5	8.5	12.7	15.7	17.2	16.7	14.3	10.6	5.4	2.5	71	49	64	55
Qpe	T-GB-001	1	8	183.512	36	77	47.761	5.487	330	3.4	5.3	10	14.1	17.8	21.1	23.4	22.9	20.1	14.5	8.2	3.9	-1.8	-1.3	1.3	4.4	7.7	11.1	12.9	12.5	10.4	6.2	2	-0.9	0.8	2	5.6	9.2	12.7	16.1	18.1	17.7	15.3	10.4	5.1	1.5	83	71	72	56
Qpe	T-GB-001	2	8	213.075	36	77	47.761	5.487	330	3.4	5.3	10	14.1	17.8	21.1	23.4	22.9	20.1	14.5	8.2	3.9	-1.8	-1.3	1.3	4.4	7.7	11.1	12.9	12.5	10.4	6.2	2	-0.9	0.8	2	5.6	9.2	12.7	16.1	18.1	17.7	15.3	10.4	5.1	1.5	83	71	72	56
Qpe	T-GB-001	3	8	235.215	36	77	47.761	5.487	330	3.4	5.3	10	14.1	17.8	21.1	23.4	22.9	20.1	14.5	8.2	3.9	-1.8	-1.3	1.3	4.4	7.7	11.1	12.9	12.5	10.4	6.2	2	-0.9	0.8	2	5.6	9.2	12.7	16.1	18.1	17.7	15.3	10.4	5.1	1.5	83	71	72	56
Qpe	T-GB-001	1	8	203.543	36	87	49.361	7.872	470	1.1	3.3	7.3	12	16.1	19.9	21.3	20.4	18.6	13	6.2	3	-3.8	-3.2	-0.9	2.4	5.9	9.4	10.9	10.5	8.2	4.6	0.4	-2.2	-1.4	0	3.2	7.2	11	14.6	16.1	15.4	13.4	8.8	3.3	0.4	63	54	51	52
Qpe	T-GB-001	2	8	200.667	35	87	49.361	7.872	470	1.1	3.3	7.3	12	16.1	19.9	21.3	20.4	18.6	13	6.2	3	-3.8	-3.2	-0.9	2.4	5.9	9.4	10.9	10.5	8.2	4.6	0.4	-2.2	-1.4	0	3.2	7.2	11	14.6	16.1	15.4	13.4	8.8	3.3	0.4	63	54	51	52
Qpe	T-GB-001	3	8	192.695	36	87	49.361	7.872	470	1.1	3.3	7.3	12	16.1	19.9	21.3	20.4	18.6	13	6.2	3	-3.8	-3.2	-0.9	2.4	5.9	9.4	10.9	10.5	8.2	4.6	0.4	-2.2	-1.4	0	3.2	7.2	11	14.6	16.1	15.4	13.4	8.8	3.3	0.4	63	54	51	52
Qpe	T-GB-002	1	8	282.143	232	1	51.7942	-2.4895	90.6667	6.4	6.6	8.9	12.2	15.4	18.9	20.4	19.9	17.5	13.9	9.3	7.3	1.1	1	2	4.4	7.1	10.3	11.8	11.6	9.5	7.1	3.4	1.9	3.8	3.8	5.5	8.3	11.3	14.6	16.1	15.7	13.5	10.5	6.4	4.6	81	56	64	54
Qpe	T-GB-002	2	8	257.776	235	1	51.7942	-2.4895	90.6667	6.4	6.6	8.9	12.2	15.4	18.9	20.4	19.9	17.5	13.9	9.3	7.3	1.1	1	2	4.4	7.1	10.3	11.8	11.6	9.5	7.1	3.4	1.9	3.8	3.8	5.5	8.3	11.3	14.6	16.1	15.7	13.5	10.5	6.4	4.6	81	56	64	54
Qpe	T-GB-002	3	8	306.479	241	1	51.7942	-2.4895	90.6667	6.4	6.6	8.9	12.2	15.4	18.9	20.4	19.9	17.5	13.9	9.3	7.3	1.1	1	2	4.4	7.1	10.3	11.8	11.6	9.5	7.1	3.4	1.9	3.8	3.8	5.5	8.3	11.3	14.6	16.1	15.7	13.5	10.5	6.4	4.6	81	56	64	54
Qpe	T-GB-002	1	8	247.945	44	26	51.948	-2.45	70	6.5	6.8	9.1	12.2	15.5	18.9	20.3	19.9	17.6	14.2	9.5	7.4	1.2	1.1	2.2	4.5	7.2	10.3	11.8	11.6	9.6	7.3	3.6	2.1	3.9	4	5.6	8.3	11.3	14.6	16.1	15.7	13.6	10.7	6.5	4.8	69	48	55	49
Qpe	T-GB-002	2	8	281.407	58	26	51.948	-2.45	70	6.5	6.8	9.1	12.2	15.5	18.9	20.3	19.9	17.6	14.2	9.5	7.4	1.2	1.1	2.2	4.5	7.2	10.3	11.8	11.6	9.6	7.3	3.6	2.1	3.9	4	5.6	8.3	11.3	14.6	16.1	15.7	13.6	10.7	6.5	4.8	69	48	55	49
Qpe	T-GB-002	3	8	273.063	57	26	51.948	-2.45	70	6.5	6.8	9.1	12.2	15.5	18.9	20.3	19.9	17.6	14.2	9.5	7.4	1.2	1.1	2.2	4.5	7.2	10.3	11.8	11.6	9.6	7.3	3.6	2.1	3.9	4	5.6	8.3	11.3	14.6	16.1	15.7	13.6	10.7	6.5	4.8	69	48	55	49
Qpe	T-GB-002	1	8	181.357	37	260	56.071	9.597	25	2.7	3.3	5.4	9.2	14.7	18	19.3	19.1	15.9	11.6	7.3	4.3	-5.4	-5.4	-2	2.8	7.6	11	12.9	11.7	9.3	5.6	1.1	0.2	-1.3	-1	1.7	6	11.1	14.5	16.1	15.4	12.6	8.6	4.2	2.2	59	41	47	43
Qpe	T-GB-002	2	8	174.533	30	260	56.071	9.597	25	2.7	3.3	5.4	9.2	14.7	18	19.3	19.1	15.9	11.6	7.3	4.3	-5.4	-5.4	-2	2.8	7.6	11	12.9	11.7	9.3	5.6	1.1	0.2	-1.3	-1	1.7	6	11.1	14.5	16.1	15.4	12.6	8.6	4.2	2.2	59	41	47	43
Qpe	T-GB-002	2	8	176.526	38	263	53.707	9.762	10	2	3.1	6.7	11.8	17	20.3	21.5	21.4	18.6	13	7.3	3.7	-2.6	-2.5	-0.3	2.7	6.6	9.9	11.9	11.5	9	5.8	2.3	-0.8	-0.3	0.3	3.2	7.3	11.8	15.1	16.7	16.4	13.8	9.4	4.8	1.5	62	44	52	47
Qpe	T-GB-002	1	8	211.533	45	277	40.917	31.667	1200	2.1	3.8	8.1	12.7	17.1	20.7	22.8	23	20.4	14.9	10.3	4.2	-4.5	-3.4	-1.1	2.7	6.5	9.2	11.4	11.1	8.7	5	1.6	-2	-1.2	0.2	3.5	7.7	11.8	14.9	17.1	17	14.6	10	6	1.1	87	69	68	67
Qpe	T-GB-002	2	8	264.537	57	277	40.917	31.667	1200	2.1	3.8	8.1	12.7	17.1	20.7	22.8	23	20.4	14.9	10.3	4.2	-4.5	-3.4	-1.1	2.7	6.5	9.2	11.4	11.1	8.7	5	1.6	-2	-1.2	0.2	3.5	7.7	11.8	14.9	17.1	17	14.6	10	6	1.1	87	69	68	67
Qpe	T-GB-002	3	8	266.041	63	277	40.917	31.667	1200	2.1	3.8	8.1	12.7	17.1	20.7	22.8	23	20.4	14.9	10.3	4.2	-4.5	-3.4	-1.1	2.7	6.5	9.2	11.4	11.1	8.7	5	1.6	-2	-1.2	0.2	3.5	7.7	11.8	14.9	17.1	17	14.6	10	6	1.1	87	69	68	67
Qpe	T-GB-002	1	8	185.177	43	31	52.8327	10.317	110	2	3.1	7.1	12.2	17.7	21	22.3	22	18.5	13	7	3.3	-3.1	-3	-0.8	2.4	6.3	9.6	11.7	11.2	8.5	5.2	1.8	-1.6	-0.6	0	3.1	7.3	12	15.3	17	16.6	13.5	9.1	4.4	0.8	53	42	47	50
Qpe	T-GB-002	2	8	169.723	31	31	52.8327	10.317	110	2	3.1	7.1	12.2	17.7	21	22.3	22	18.5	13	7	3.3	-3.1	-3	-0.8	2.4	6.3	9.6	11.7	11.2	8.5	5.2	1.8	-1.6	-0.6	0	3.1	7.3	12	15.3	17	16.6	13.5	9.1	4.4	0.8	53	42	47	50
[truncated: 279 more rows]
[truncated: 207 more columns]
